# Supplementary material for: Temporal Expression Profiles Reveal Potential Targets during Postembryonic Development of Forensically Important Sarcophaga peregrina (Diptera: Sarcophagidae)
Source: Insects. 2022 May 12;13(5):453. doi: 10.3390/insects13050453 (PMC9143129; doi:10.3390/insects13050453)
Supplement: Supplementary file 1 [file insects-13-00453-s001.zip › Supplementary Tables.xls]

## Sheet: Table S1
Table S1. The purity and integrity of all RNA samples were assessed.
Samples	C(μg/μl)	A260/A280	A260/A230	V(μl)	M(μg)	RIN
B2-1	0.3584	2.27	2.33	70	25.09	8.7
B2-2	0.9146	2.32	2.33	70	64.02	8.8
B2-3	0.7705	2.35	2.2	70	53.94	8.6
B3-1	1.1775	2.32	2.33	70	82.43	10
B3-2	0.8847	2.31	2.32	70	61.93	10
B3-3	0.8059	2.32	2.34	70	56.41	10
B4-1	0.5106	2.37	2.29	70	35.74	10
B4-2	0.5837	2.34	2.3	70	40.86	10
B4-3	0.7479	2.35	2.25	70	52.35	10
B5-1	0.8749	2.33	2.27	70	61.24	9.9
B5-2	0.857	2.33	2.31	70	59.99	9.9
B5-3	0.635	2.35	2.31	70	44.45	9.6
O1	0.7123	2.12	2.14	60	54.85	7.5
O2	0.6179	2.13	2.13	60	37.07	7.1
O3	0.9141	2.14	2.19	60	54.85	7

## Sheet: Table S2
Table S2. Summary statistics of raw transcriptome data during developmental stages.
Sample	RawReads	RawBases	CleanReads	CleanBases	ValidBases	Q30	GC
O1	49.50M	7.42G	47.91M	6.94G	0.9342	0.9418	0.4194
O2	58.67M	8.80G	57.37M	8.26G	0.9388	0.9548	0.4177
O3	54.59M	8.19G	52.39M	7.54G	0.9212	0.9332	0.4217
B2_1	48.30M	7.25G	47.37M	6.71G	0.9264	0.934	0.4195
B2_2	48.29M	7.24G	47.28M	6.66G	0.9193	0.9322	0.4181
B2_3	47.72M	7.16G	46.74M	6.61G	0.923	0.9326	0.4196
B3_1	48.87M	7.33G	48.07M	6.91G	0.9433	0.9375	0.4293
B3_2	48.71M	7.31G	47.86M	6.91G	0.9455	0.9371	0.4311
B3_3	50.29M	7.54G	49.46M	7.14G	0.9471	0.9371	0.4309
B4_1	50.05M	7.51G	49.17M	7.07G	0.942	0.9369	0.4105
B4_2	49.06M	7.36G	48.20M	6.94G	0.9426	0.9376	0.42
B4_3	47.69M	7.15G	46.87M	6.73G	0.9414	0.937	0.4107
B5_1	49.45M	7.42G	48.56M	6.98G	0.9408	0.9367	0.4091
B5_2	48.32M	7.25G	47.44M	6.83G	0.943	0.937	0.4091
B5_3	48.76M	7.31G	47.97M	6.90G	0.9435	0.9376	0.4091

## Sheet: Table S3
Table S3. Data statistic of original transcripts aligned with genome assembly.
Sample	Total reads	Total mapped reads	Multiple mapped	Uniquely mapped	Reads mapped in proper pairs
B2_1	47371242	44954922(94.90%)	6126982(12.93%)	38827940(81.97%)	37456676(79.07%)
B2_2	47278346	45042063(95.27%)	6246692(13.21%)	38795371(82.06%)	37489958(79.30%)
B2_3	46735542	44385454(94.97%)	6249189(13.37%)	38136265(81.60%)	36760970(78.66%)
B3_1	48067184	45690196(95.05%)	3699961(7.70%)	41990235(87.36%)	40548994(84.36%)
B3_2	47858674	45508696(95.09%)	3037922(6.35%)	42470774(88.74%)	41055198(85.78%)
B3_3	49456880	47036457(95.11%)	3465119(7.01%)	43571338(88.10%)	42100174(85.13%)
B4_1	49171576	45728760(93.00%)	3460474(7.04%)	42268286(85.96%)	40583778(82.54%)
B4_2	48204724	45492651(94.37%)	4741808(9.84%)	40750843(84.54%)	39250080(81.42%)
B4_3	46868120	43522536(92.86%)	3979404(8.49%)	39543132(84.37%)	37863392(80.79%)
B5_1	48559412	44332047(91.29%)	3018287(6.22%)	41313760(85.08%)	39406126(81.15%)
B5_2	47441524	42906521(90.44%)	3103588(6.54%)	39802933(83.90%)	37851772(79.79%)
B5_3	47972212	43490513(90.66%)	3021635(6.30%)	40468878(84.36%)	38505210(80.27%)
O1	47906164	46220241(96.48%)	3507297(7.32%)	42712944(89.16%)	41525460(86.68%)
O2	57370338	55213228(96.24%)	4532590(7.90%)	50680638(88.34%)	49020404(85.45%)
O3	52393194	50406034(96.21%)	3054245(5.83%)	47351789(90.38%)	45977324(87.75%)

## Sheet: Table S4
Table S4. Statistic and annotation of gene expression profiles (FPKM).
gene_id	O_1	O_2	O_3	B2_1	B2_2	B2_3	B3_1	B3_2	B3_3	B4_1	B4_2	B4_3	B5_1	B5_2	B5_3	Symbol	SwissProt_ID	SwissProt_Function	Trembl_DatabaseID	Trembl_Description	InterProAccession_InterProDescription	GO_id	GO_term	pathwy	pathway_description
evm.model.Contig76.72	21.3151	0.619181	23.6392	16.5766	34.6646	32.797	29.4727	0.285997	0.90799	17811.8	8529.56	21958.1	42768.6	46188.8	45622.9	Fbp1	FBP1_DROME	Fat-body protein 1 OS=Drosophila melanogaster GN=Fbp1 PE=2 SV=2	tr|Q26654|Q26654_SARPE	Storage protein-binding protein OS=Sarcophaga peregrina PE=2 SV=1	IPR013788:Hemocyanin/hexamerin
evm.model.Contig76.74	13.1835	0.184675	15.2425	10.6218	22.0476	23.4882	15.5367	0.370869	0.071731	12688.8	5977.68	16116.9	28473.9	34338.5	25608.6	Fbp1	FBP1_DROME	Fat-body protein 1 OS=Drosophila melanogaster GN=Fbp1 PE=2 SV=2	tr|Q26654|Q26654_SARPE	Storage protein-binding protein OS=Sarcophaga peregrina PE=2 SV=1	IPR013788:Hemocyanin/hexamerin
evm.model.Contig23.150	10.2479	0.487006	14.5058	17.8144	14.9991	17.2014	28.5356	4.60451	5.93175	15448	6621.72	17621.8	19008.4	19387.3	22026.8	Obp99b	OB99B_DROME	General odorant-binding protein 99b OS=Drosophila melanogaster GN=Obp99b PE=2 SV=1	tr|A0A0L0CEI4|A0A0L0CEI4_LUCCU	General odorant-binding protein 99b OS=Lucilia cuprina GN=FF38_11692 PE=4 SV=1	IPR006170:Pheromone/general odorant binding protein	GO:0005549	odorant binding
evm.model.Contig1.1028	7.23522	0.519102	9.70442	6.92469	6.79592	7.52627	6.78459	2.78127	0	6749.18	2300.39	7352.02	13837.2	14442.4	12999.8	mariner\T	ANTF_SARPE	Antifungal protein OS=Sarcophaga peregrina PE=1 SV=1
evm.model.Contig23.256	7.72117	0.122214	9.5301	18.9685	9.22054	10.1335	7.55749	0.174681	0.503661	20972.4	9493.53	26118.4	12636.7	10287.9	12291.5	Lsp2	LSP2_DROME	Larval serum protein 2 OS=Drosophila melanogaster GN=Lsp2 PE=1 SV=2	tr|P91922|P91922_CALVI	Hexamerin LSP-2 OS=Calliphora vicina PE=2 SV=1	IPR013788:Hemocyanin/hexamerin
evm.model.Contig114.56	3.79244	1.52729	6.85755	1.59039	10.5443	8.73037	9.48097	2.05642	2.82267	217.256	67.0934	71.859	14501.3	10495.3	10567.6	btbd11a	CUD9_SCHGR	Endocuticle structural glycoprotein SgAbd-9 OS=Schistocerca gregaria PE=1 SV=1	tr|A0A0L0CAM9|A0A0L0CAM9_LUCCU	Uncharacterized protein OS=Lucilia cuprina GN=FF38_05678 PE=4 SV=1	IPR000618:Insect cuticle protein	GO:0042302	structural constituent of cuticle
evm.model.Contig113.18	0.565858	0	3.09026	0	3.13081	3.13082	2.79165	0	0.543401	191.689	139.058	318.078	7343.78	6531.49	6901.74				tr|A0A1I8P6K5|A0A1I8P6K5_STOCA	Uncharacterized protein OS=Stomoxys calcitrans GN=106086016 PE=4 SV=1	IPR029277:Single domain Von Willebrand factor type C domain
evm.model.Contig50.132	1.91788	0	1.84005	0.0328137	5.23205	2.73902	2.63738	0	0	12.9	14.2814	11.8256	6432.48	4339.26	5866.17				tr|A0A0L0C1E3|A0A0L0C1E3_LUCCU	Uncharacterized protein OS=Lucilia cuprina GN=FF38_11017 PE=4 SV=1
evm.model.Contig33.144	3.90223	0	5.49041	0	5.93016	4.00059	2.57822	0	0	2.99056	3.57916	3.78519	5321.54	5038.63	4369.46	At5g06550	VASOT_HYBBI	Vasotab OS=Hybomitra bimaculata PE=1 SV=1	tr|A0A0L0BW52|A0A0L0BW52_LUCCU	Uncharacterized protein OS=Lucilia cuprina GN=FF38_02051 PE=4 SV=1	IPR002350:Kazal domain	GO:0005515	protein binding
evm.model.Contig8.273	89.8846	73.4029	53.7209	90.5815	97.9226	75.0778	375.473	432.922	452.91	4695.97	2323.94	4811.83	3356.57	3802.83	4235.63	Pde6	CYTA_SARPE	Sarcocystatin-A OS=Sarcophaga peregrina PE=1 SV=1	tr|Q8T0Y2|Q8T0Y2_SARCR	Sarcocystatin A (Fragment) OS=Sarcophaga crassipalpis GN=Scys-A PE=2 SV=1	IPR000010:Cystatin domain	GO:0004869	cysteine-type endopeptidase inhibitor activity
evm.model.Contig23.145	187.808	183.471	139.127	146.723	217.234	218.536	2515.95	2685.33	3267.14	5063.04	3413.22	5259.09	3765.4	3082.89	4118.46	Obp99a	OB99A_DROME	General odorant-binding protein 99a OS=Drosophila melanogaster GN=Obp99a PE=1 SV=2	tr|A0A068F4Z1|A0A068F4Z1_CALSG	Odorant binding protein OS=Calliphora stygia GN=OBP25 PE=2 SV=1	IPR006170:Pheromone/general odorant binding protein	GO:0005549	odorant binding
evm.model.Contig16.231	2.63862	0.392918	2.72125	8.56533	3.2823	2.84958	2.36043	0.156783	0.446327	7954.31	4684.29	9626.05	4352.83	3625.55	3943.12	ADH	25KD_SARPE	Development-specific 25 kDa protein OS=Sarcophaga peregrina PE=2 SV=1	tr|I6R9A2|I6R9A2_9MUSC	15-hydroxyprostaglandin dehydrogenase OS=Delia antiqua PE=2 SV=1	IPR002347:Short-chain dehydrogenase/reductase SDR	GO:0004022	alcohol dehydrogenase (NAD activity)
evm.model.Contig29.35	4.41486	2.0552	3.56852	4.86524	9.08864	8.37147	5.70024	0.380059	3.90952	121.474	90.0202	31.9017	5390.88	6450.97	3894.86	Hsp23	HSP23_DROME	Heat shock protein 23 OS=Drosophila melanogaster GN=Hsp23 PE=2 SV=2	tr|A0A0L0CQ23|A0A0L0CQ23_LUCCU	Heat shock protein 23 OS=Lucilia cuprina GN=FF38_06006 PE=3 SV=1	IPR001436:Alpha crystallin/Heat shock protein
evm.model.Contig5.255	42.697	25.5668	29.3356	359.34	225.276	224.014	501.484	290.705	245.782	673.713	385.11	581.529	2671.38	2660.17	3620.55				tr|A0A0L0BZW5|A0A0L0BZW5_LUCCU	Uncharacterized protein OS=Lucilia cuprina GN=FF38_12960 PE=4 SV=1
evm.model.Contig19.37	1.46365	0	3.07823	4.90687	3.5909	2.98104	2.43528	0.229834	0.60256	7295.59	3780.94	5799.25	4102.49	3673.97	3572.04	VG1-GAMMA	VIT1_CERCA	Vitellogenin-1 OS=Ceratitis capitata GN=VG1-GAMMA PE=2 SV=1	tr|A0A0L0CNW5|A0A0L0CNW5_LUCCU	Vitellogenin-2 OS=Lucilia cuprina GN=FF38_05365 PE=3 SV=1	IPR000734:Triacylglycerol lipase family	GO:0052689	carboxylic ester hydrolase activity
evm.model.Contig6.822	9932.03	10490.3	11587.4	4815.58	5409.46	4897.65	6670.11	7401.1	6926.38	3820.37	3057.19	3638.42	3644.1	3526.72	3415.03	Ef1alpha48D	EF1A1_DROME	Elongation factor 1-alpha 1 OS=Drosophila melanogaster GN=Ef1alpha48D PE=1 SV=2	tr|A0A1L8EHJ9|A0A1L8EHJ9_HAEIR	Elongation factor 1-alpha OS=Haematobia irritans PE=3 SV=1	IPR000795:Transcription factor, GTP-binding domain	GO:0003924	GTPase activity	path:ko03013,path:ko05134	RNA transport|Legionellosis
evm.model.Contig37.82	1515.35	1348.74	1739.34	828.05	860.778	842.751	1704.48	2635.3	2277.79	1930.3	1356.63	1819.09	3660.04	3503.53	3314.25	Act5C	ACT5C_ANOGA	Actin-5C OS=Anopheles gambiae GN=Act5C PE=2 SV=1	tr|A0A1L8ECP3|A0A1L8ECP3_HAEIR	Putative actin-related protein (Fragment) OS=Haematobia irritans PE=3 SV=1	IPR004000:Actin family			path:ko04015,path:ko04145,path:ko04210,path:ko04390,path:ko04391,path:ko04510,path:ko04520,path:ko04530,path:ko04611,path:ko04670,path:ko04714,path:ko04745,path:ko04810,path:ko04919,path:ko04921,path:ko05100,path:ko05110,path:ko05130,path:ko05131,path:ko05132,path:ko05164,path:ko05205,path:ko05225,path:ko05410,path:ko05412,path:ko05414,path:ko05416,path:ko05418	Rap1 signaling pathway|Phagosome|Apoptosis|Hippo signaling pathway|Hippo signaling pathway - fly|Focal adhesion|Adherens junction|Tight junction|Platelet activation|Leukocyte transendothelial migration|Thermogenesis|Phototransduction - fly|Regulation of actin cytoskeleton|Thyroid hormone signaling pathway|Oxytocin signaling pathway|Bacterial invasion of epithelial cells|Vibrio cholerae infection|…
evm.model.Contig101.72	17879	16642.1	17499.2	8029.01	8262.96	8540.65	5517.18	5564.47	5087.17	2989.47	1839.67	2643.19	3450.52	3073.33	3159.35	RpL29	RL29_DROME	60S ribosomal protein L29 OS=Drosophila melanogaster GN=RpL29 PE=1 SV=1	tr|A0A0L0BLG9|A0A0L0BLG9_LUCCU	60S ribosomal protein L29 OS=Lucilia cuprina GN=FF38_00322 PE=3 SV=1	IPR002673:Ribosomal protein L29e	GO:0003735	structural constituent of ribosome	path:ko03010	Ribosome
evm.model.Contig33.134	123.426	137.417	145.408	225.79	71.2882	114.326	399.548	155.286	268.457	80.9724	37.8267	349.318	3265.58	2617.08	2678.22				tr|A0A0L0BNB8|A0A0L0BNB8_LUCCU	Uncharacterized protein OS=Lucilia cuprina GN=FF38_12618 PE=4 SV=1
evm.model.Contig1.749	5.10448	3.90269	4.30001	5.26986	4.92075	2.9936	1.85535	0.531406	0.227646	1.92998	1.32327	1.35727	655.739	1795.55	2647.97	Tmprss3	TMPS3_MOUSE	Transmembrane protease serine 3 OS=Mus musculus GN=Tmprss3 PE=1 SV=2	tr|O15944|O15944_SARPE	26kDa protease OS=Sarcophaga peregrina PE=2 SV=1	IPR001254:Serine proteases, trypsin domain	GO:0004252	serine-type endopeptidase activity
evm.model.Contig11.411	10373.3	9905.5	10057.4	5674.41	6292.59	5916.09	4866.24	4940.53	4672.61	2361.24	1946.11	2181.89	2799.67	2475.47	2633.53	RpS8	RS8_DROME	40S ribosomal protein S8 OS=Drosophila melanogaster GN=RpS8 PE=1 SV=1	tr|A0A0L0C2Q3|A0A0L0C2Q3_LUCCU	40S ribosomal protein S8 OS=Lucilia cuprina GN=FF38_01355 PE=3 SV=1	IPR022309:Ribosomal protein S8e/ribosomal biogenesis NSA2	GO:0003735	structural constituent of ribosome	path:ko03010	Ribosome
evm.model.Contig34.231	0	0	1.48641	1.43684	1.84623	2.26602	28.6476	18.0922	26.5359	69.5533	253.908	261.456	898.885	1133.63	2580.46	Obp56a	OB56A_DROME	General odorant-binding protein 56a OS=Drosophila melanogaster GN=Obp56a PE=1 SV=1	tr|L8B8J6|L8B8J6_9MUSC	Odorant-binding protein OS=Phormia regina GN=PregOBP56a PE=1 SV=1	IPR006170:Pheromone/general odorant binding protein	GO:0005549	odorant binding
evm.model.Contig24.44	11263	10423	10622.1	5320.83	5676.21	5758.14	4770.89	4716	4615.65	2377.12	1927.71	2147.99	2686.64	2487.56	2553.73	RpS3A	RS3A_DROPS	40S ribosomal protein S3a OS=Drosophila pseudoobscura pseudoobscura GN=RpS3A PE=3 SV=1	tr|A0A0L0CQ70|A0A0L0CQ70_LUCCU	40S ribosomal protein S3a OS=Lucilia cuprina GN=FF38_05923 PE=3 SV=1	IPR001593:Ribosomal protein S3Ae	GO:0003735	structural constituent of ribosome	path:ko03010	Ribosome
evm.model.Contig94.18	8902.42	7369.54	7514.67	5141.24	6106.32	5837.42	4110.43	3727.25	3769.19	2376.81	1698.81	2204.99	2726.26	2506.1	2509.7	RpS25	RS25_DROME	40S ribosomal protein S25 OS=Drosophila melanogaster GN=RpS25 PE=1 SV=3	tr|A0A1L8E8R8|A0A1L8E8R8_HAEIR	Putative 40s ribosomal protein s25 (Fragment) OS=Haematobia irritans PE=4 SV=1	IPR004977:Ribosomal protein S25			path:ko03010	Ribosome
evm.model.Contig1.924	98.8008	120.852	130.507	75.965	30.6339	47.735	619.932	136.37	304.945	3997.59	2248.07	4495.79	1920.58	2334.11	2465.95	Nupr1	NUPR1_RAT	Nuclear protein 1 OS=Rattus norvegicus GN=Nupr1 PE=2 SV=1	tr|A0A0L0C6D1|A0A0L0C6D1_LUCCU	Uncharacterized protein OS=Lucilia cuprina GN=FF38_12511 PE=4 SV=1	IPR018792:Nuclear protein 1-like
evm.model.Contig8.284	46.4697	42.4376	39.1561	44.8458	46.7131	42.7598	117.173	69.0066	100.922	1064.11	380.408	867.011	2338.49	2180.61	2297.84	OSBPL8	CYTA_SARPE	Sarcocystatin-A OS=Sarcophaga peregrina PE=1 SV=1	tr|Q8T0Y1|Q8T0Y1_SARCR	Sarcocystatin B (Fragment) OS=Sarcophaga crassipalpis GN=Scys-B PE=2 SV=1	IPR000010:Cystatin domain	GO:0004869	cysteine-type endopeptidase inhibitor activity
evm.model.Contig21.67	8399.33	8576.67	8770.44	4375.31	4652.98	4637.31	3774.04	3885.65	3541.56	2001.71	1466.72	1847.06	2443.74	2095.31	2293.11	RpL7A	RL7A_DROME	60S ribosomal protein L7a OS=Drosophila melanogaster GN=RpL7A PE=1 SV=2	tr|A0A0L0BZW6|A0A0L0BZW6_LUCCU	60S ribosomal protein L7a OS=Lucilia cuprina GN=FF38_04861 PE=4 SV=1	IPR001921:Ribosomal protein L7A/L8			path:ko03010	Ribosome
evm.model.Contig114.31	10956.7	10174	10779.5	4855.06	4967.71	5097.55	4037.69	3950.77	3709.27	2043.69	1614.3	1941.87	2431.45	2096.73	2282.2	Rpl26	RL26_MOUSE	60S ribosomal protein L26 OS=Mus musculus GN=Rpl26 PE=1 SV=1	tr|A0A0L0CCS8|A0A0L0CCS8_LUCCU	Uncharacterized protein OS=Lucilia cuprina GN=FF38_07003 PE=3 SV=1	IPR005756:Ribosomal protein L26/L24, eukaryotic/archaeal	GO:0003735	structural constituent of ribosome	path:ko03010	Ribosome
evm.model.Contig1.853	9390.53	7582.29	7684.78	4374.74	5356.94	5011.37	4091.72	3708.02	3839.75	2060.3	1457.03	1817.5	2407.78	2204.16	2260.56	RpL27A	RL27A_DROME	60S ribosomal protein L27a OS=Drosophila melanogaster GN=RpL27A PE=1 SV=2	tr|T1P926|T1P926_MUSDO	Ribosomal protein L18e/L15 OS=Musca domestica GN=101898357 PE=2 SV=1	IPR021131:Ribosomal protein L18e/L15P			path:ko03010	Ribosome
evm.model.Contig37.97	10059.3	8414.36	9095.67	4838.82	5186.29	5095.06	4243.73	4318.3	4069.4	1944.58	1509.16	1730.45	2456.74	2142.39	2205.38	RpS15Aa	RS15A_DROYA	40S ribosomal protein S15a OS=Drosophila yakuba GN=RpS15Aa PE=2 SV=3	tr|A0A1L8EI27|A0A1L8EI27_HAEIR	Putative 40s ribosomal protein s15a OS=Haematobia irritans PE=3 SV=1	IPR000630:Ribosomal protein S8	GO:0003735	structural constituent of ribosome	path:ko03010	Ribosome
evm.model.Contig2.186	9595.68	8454.74	8582.95	4577.91	5160.96	4953.61	3761.96	3669.03	3479.66	1855.88	1542.73	1737.86	2236.16	2073.23	2174.54	RpL10	RL10_DROME	60S ribosomal protein L10 OS=Drosophila melanogaster GN=RpL10 PE=1 SV=1	tr|A0A0L0BXQ3|A0A0L0BXQ3_LUCCU	60S ribosomal protein L10 OS=Lucilia cuprina GN=FF38_03363 PE=4 SV=1	IPR016180:Ribosomal protein L10e/L16	GO:0003735	structural constituent of ribosome	path:ko03010	Ribosome
evm.model.Contig7.50	8747.4	8018.66	7606.76	4335.96	5004.13	4637.27	3926.26	4023.89	3802.3	1972.37	1505.56	1774.95	2226.48	2071.86	2161.15	RpS11	RS11_DROPS	40S ribosomal protein S11 OS=Drosophila pseudoobscura pseudoobscura GN=RpS11 PE=3 SV=2	tr|A0A1L8EFK6|A0A1L8EFK6_HAEIR	Putative 40s ribosomal protein s11 isoform x1 OS=Haematobia irritans PE=3 SV=1	IPR000266:Ribosomal protein S17/S11	GO:0003735	structural constituent of ribosome	path:ko03010	Ribosome
evm.model.Contig15.126	9102.27	7758.49	7953.84	3957.09	4311.41	4196.3	3685.92	3755.71	3522.61	1963.14	1431.46	1719.55	2255.33	1981.26	2127.3	rpl27	RL27_DANRE	60S ribosomal protein L27 OS=Danio rerio GN=rpl27 PE=2 SV=3	tr|A0A1L8ECE5|A0A1L8ECE5_HAEIR	60S ribosomal protein L27 (Fragment) OS=Haematobia irritans PE=3 SV=1	IPR001141:Ribosomal protein L27e	GO:0003735	structural constituent of ribosome	path:ko03010	Ribosome
evm.model.Contig137.42	26.5375	31.088	29.1073	413.016	153.635	440.96	24.4527	25.2821	12.7755	4.41705	4.16222	4.20862	1887.49	2241.35	2058.08	ple	TY3H_DROME	Tyrosine 3-monooxygenase OS=Drosophila melanogaster GN=ple PE=2 SV=2	tr|A0A0L0CQQ4|A0A0L0CQQ4_LUCCU	Tyrosine 3-monooxygenase OS=Lucilia cuprina GN=FF38_09167 PE=4 SV=1	IPR001273:Aromatic amino acid hydroxylase	GO:0016714	oxidoreductase activity, acting on paired donors, with incorporation or reduction of molecular oxygen, reduced pteridine as one donor, and incorporation of one atom of oxygen	path:ko00350,path:ko00790,path:ko00950,path:ko04728,path:ko04917,path:ko05012,path:ko05030,path:ko05031,path:ko05034	Tyrosine metabolism|Folate biosynthesis|Isoquinoline alkaloid biosynthesis|Dopaminergic synapse|Prolactin signaling pathway|Parkinson's disease|Cocaine addiction|Amphetamine addiction|Alcoholism
evm.model.Contig25.54	8589.37	6777.02	6995.4	4427.8	4724.97	4870.57	3254.35	3014.63	2819.9	1781.19	1364.47	1568.94	2193.5	1994.06	2030.05	RpL40	RL40_DROME	Ubiquitin-60S ribosomal protein L40 OS=Drosophila melanogaster GN=RpL40 PE=1 SV=2	tr|B4KFP9|B4KFP9_DROMO	Uncharacterized protein OS=Drosophila mojavensis GN=Dmoj\GI16482 PE=4 SV=1	IPR001975:Ribosomal protein L40e	GO:0003735	structural constituent of ribosome	path:ko03010	Ribosome
evm.model.Contig21.282	7601.08	6438.6	6616.54	3351.57	4509.65	4400.9	3128.02	3559.02	3225.02	1698.9	1310.73	1628.93	2091.53	1888.59	2028.44	RpL37a	RL371_DROME	Probable 60S ribosomal protein L37-A OS=Drosophila melanogaster GN=RpL37a PE=1 SV=1	tr|B3MR67|B3MR67_DROAN	Ribosomal protein L37 OS=Drosophila ananassae GN=Dana\GF21054 PE=3 SV=2	IPR001569:Ribosomal protein L37e	GO:0003735	structural constituent of ribosome	path:ko03010	Ribosome
evm.model.Contig101.78	7835.3	7272.04	7277.18	3597.49	3809.24	3815.9	3252.73	3150.08	3205.9	1794.99	1322.12	1667.38	2131.94	1939.46	2023.39	RPS15	RS15_ELAOL	40S ribosomal protein S15 OS=Elaeis oleifera GN=RPS15 PE=2 SV=1	tr|A0A0L0BLJ4|A0A0L0BLJ4_LUCCU	Uncharacterized protein OS=Lucilia cuprina GN=FF38_00314 PE=3 SV=1	IPR002222:Ribosomal protein S19/S15	GO:0003735	structural constituent of ribosome	path:ko03010	Ribosome
evm.model.Contig2.891	8788.19	8736.61	8918.45	4202.12	4450.85	4402.13	3556.15	3460.87	3323.19	1721.23	1537.21	1688.02	2049.8	1752.84	2008.78	RpS7	RS7_DROYA	40S ribosomal protein S7 OS=Drosophila yakuba GN=RpS7 PE=2 SV=1	tr|A0A0L0BZE9|A0A0L0BZE9_LUCCU	Uncharacterized protein OS=Lucilia cuprina GN=FF38_02137 PE=4 SV=1	IPR000554:Ribosomal protein S7e	GO:0003735	structural constituent of ribosome	path:ko03010	Ribosome
evm.model.Contig60.80	9237.31	8035.13	8173.66	4603.53	5061.34	4990.17	3359.35	3000.85	3058.63	1690.41	1274.93	1530.69	2076.84	1653.85	1947.95	RpL36	RL36_DROME	60S ribosomal protein L36 OS=Drosophila melanogaster GN=RpL36 PE=1 SV=1	tr|W8C7S2|W8C7S2_CERCA	60S ribosomal protein L36 OS=Ceratitis capitata GN=RL36 PE=2 SV=1	IPR000509:Ribosomal protein L36e	GO:0003735	structural constituent of ribosome	path:ko03010	Ribosome
evm.model.Contig5.123	9846.19	9483.12	9765.64	4718.79	5220.58	5085.09	4232.55	4109.92	3799.13	1727.58	1399.77	1567.85	2125.51	1763.26	1946.48	RpL13A	RL13A_DROME	60S ribosomal protein L13a OS=Drosophila melanogaster GN=RpL13A PE=1 SV=1	tr|A0A0L0CSY1|A0A0L0CSY1_LUCCU	60S ribosomal protein L13a OS=Lucilia cuprina GN=FF38_10303 PE=3 SV=1	IPR005755:Ribosomal protein L13, eukaryotic/archaeal	GO:0003735	structural constituent of ribosome	path:ko03010	Ribosome
evm.model.Contig3.449	9941.1	9314.18	9529.77	4858.06	5403.53	5102.14	3619.58	3407.99	3266.25	1837.41	1468.11	1635.35	1989.73	1708.22	1913.5	RpS27A	RS27A_DROME	Ubiquitin-40S ribosomal protein S27a OS=Drosophila melanogaster GN=RpS27A PE=1 SV=2	tr|A0A1B0BD35|A0A1B0BD35_9MUSC	Uncharacterized protein OS=Glossina palpalis gambiensis PE=4 SV=1	IPR000626:Ubiquitin domain	GO:0003735	structural constituent of ribosome	path:ko03010	Ribosome
evm.model.Contig3.682	8634.02	8087.19	7789.07	4712.19	5227.12	5087.97	3560.21	3117.68	3200.1	1666.21	1349.77	1486.81	1897.15	1645.96	1815.5	RpL9	RL9_DROME	60S ribosomal protein L9 OS=Drosophila melanogaster GN=RpL9 PE=1 SV=2	tr|A0A0L0C7R5|A0A0L0C7R5_LUCCU	60S ribosomal protein L9 OS=Lucilia cuprina GN=FF38_13997 PE=4 SV=1	IPR020040:Ribosomal protein L6, alpha-beta domain	GO:0003735	structural constituent of ribosome	path:ko03010	Ribosome
evm.model.Contig64.104	8345.91	8069.92	8266.25	4653.62	4940.9	4787.62	3306.29	3270.37	3220.31	1813.85	1326.14	1579.99	2018.91	1629.56	1806.2	RpL28	RL28_DROME	60S ribosomal protein L28 OS=Drosophila melanogaster GN=RpL28 PE=1 SV=1	tr|T1PFD4|T1PFD4_MUSDO	Ribosomal L28e protein OS=Musca domestica GN=101893218 PE=2 SV=1	IPR029004:Ribosomal L28e/Mak16	GO:0003735	structural constituent of ribosome	path:ko03010	Ribosome
evm.model.Contig10.197	7853.92	7259.98	7261.36	4530.93	4871.09	4891.19	3473	3192.51	3172.7	1671.95	1273.69	1605.73	1897.89	1652.74	1803.99	RpS19a	RS19A_DROME	40S ribosomal protein S19a OS=Drosophila melanogaster GN=RpS19a PE=1 SV=3	tr|A0A0L0CHT1|A0A0L0CHT1_LUCCU	40S ribosomal protein S19a OS=Lucilia cuprina GN=FF38_03762 PE=4 SV=1	IPR001266:Ribosomal protein S19e	GO:0003735	structural constituent of ribosome	path:ko03010	Ribosome
evm.model.Contig9.268	7231.35	7196.97	7428.75	3587.05	3890.25	3799.96	3350.17	3367.71	3093.22	1619.06	1392.45	1518.92	1917.58	1668.38	1800.05	RpS3	RS3_DROME	40S ribosomal protein S3 OS=Drosophila melanogaster GN=RpS3 PE=1 SV=1	tr|A0A0G4AJS3|A0A0G4AJS3_LUCSE	40S ribosomal protein S3 OS=Lucilia sericata PE=2 SV=1	IPR001351:Ribosomal protein S3, C-terminal	GO:0003723	RNA binding	path:ko03010	Ribosome
evm.model.Contig524.2	1.4745	0	0.659096	0	4.62906	0	0.719913	0	0	0.684692	1.44366	0.750184	1014.12	801.998	1795.01	tycC	VKT39_HAPSC	U15-theraphotoxin-Hs1a OS=Haplopelma schmidti PE=2 SV=1	tr|A0A0L0BRU8|A0A0L0BRU8_LUCCU	Uncharacterized protein OS=Lucilia cuprina GN=FF38_12133 PE=4 SV=1	IPR002223:Pancreatic trypsin inhibitor Kunitz domain	GO:0004867	serine-type endopeptidase inhibitor activity
evm.model.Contig63.34	1481.45	1661.57	1681.42	2173.13	2310.78	2234.4	2399.02	2151.43	2378.37	1601.54	1718.75	1383.12	2082.14	2612.01	1785.62	alphaTub84B	TBA1_DROME	Tubulin alpha-1 chain OS=Drosophila melanogaster GN=alphaTub84B PE=2 SV=1	tr|A0A1S3KF99|A0A1S3KF99_LINUN	Tubulin alpha chain OS=Lingula unguis GN=LOC106181475 PE=3 SV=1	IPR000217:Tubulin	GO:0003924	GTPase activity	path:ko04145,path:ko04210,path:ko04530,path:ko04540,path:ko05130	Phagosome|Apoptosis|Tight junction|Gap junction|Pathogenic Escherichia coli infection
evm.model.Contig9.205	10045.1	8992.18	9521.26	4917.87	5389.09	5445.36	3544.87	3590.35	3271.69	1590.21	1191.65	1392.42	1916.31	1619.74	1782.47	RpS13	RS13_DROME	40S ribosomal protein S13 OS=Drosophila melanogaster GN=RpS13 PE=1 SV=3	tr|A0A1A9Y8I1|A0A1A9Y8I1_GLOFF	Uncharacterized protein OS=Glossina fuscipes fuscipes PE=3 SV=1	IPR023029:Ribosomal protein S15P	GO:0003735	structural constituent of ribosome	path:ko03010	Ribosome
evm.model.Contig108.68	213.672	200.777	190.839	85.9107	144.287	104.66	590.471	832.265	709.723	1521.23	866.815	1488.87	2086.76	2905.97	1767.69	SLC26A11	ML1P_MANSE	MD-2-related lipid-recognition protein OS=Manduca sexta PE=1 SV=1	tr|A0A0L0CFN3|A0A0L0CFN3_LUCCU	Uncharacterized protein OS=Lucilia cuprina GN=FF38_00563 PE=4 SV=1	IPR003172:MD-2-related lipid-recognition domain			path:ko04142,path:ko04979	Lysosome|Cholesterol metabolism
evm.model.Contig50.133	0.558442	0	0	0	0	1.5195	1.08467	0	0	1.06068	1.61732	0.569467	930.983	2158	1752.45				tr|A0A0L0C1E8|A0A0L0C1E8_LUCCU	Uncharacterized protein OS=Lucilia cuprina GN=FF38_11012 PE=4 SV=1
evm.model.Contig10.377	6960.54	6568.18	6705.75	3974.19	4135.1	4285.82	3029.4	3008.02	2841.18	1534.68	1184.26	1393.9	1774.29	1550.82	1731.55				tr|A0A1A9XRQ5|A0A1A9XRQ5_GLOFF	Uncharacterized protein OS=Glossina fuscipes fuscipes PE=3 SV=1	IPR001971:Ribosomal protein S11	GO:0003735	structural constituent of ribosome	path:ko03010	Ribosome
evm.model.Contig98.17	14.9408	9.82024	6.95553	7.27637	40.4371	27.3804	49.4436	296.321	649.233	2.34488	1913.75	1405.98	219.415	184.791	1730.53				tr|A0A0L0C4F9|A0A0L0C4F9_LUCCU	Uncharacterized protein OS=Lucilia cuprina GN=FF38_12671 PE=4 SV=1
evm.model.Contig27.249	8566.07	7757.21	8091.97	4245.7	4685.35	4564.55	3247.49	3158.47	3054.74	1567.82	1113.69	1437.11	1851.04	1611.84	1720.69	RpL14	RL14_DROVI	60S ribosomal protein L14 OS=Drosophila virilis GN=RpL14 PE=3 SV=1	tr|A0A0K8V2L1|A0A0K8V2L1_BACLA	60S ribosomal protein L14 OS=Bactrocera latifrons GN=RpL14_0 PE=4 SV=1	IPR002784:Ribosomal protein L14e domain	GO:0003735	structural constituent of ribosome	path:ko03010	Ribosome
evm.model.Contig6.559	8689.6	8826.7	8540.48	4273.53	4503.04	4331.33	2926.97	2921.59	2834.66	1569.49	1229.32	1424.9	1864.96	1631.6	1717.74	RpL19	RL19_DROME	60S ribosomal protein L19 OS=Drosophila melanogaster GN=RpL19 PE=1 SV=2	tr|A0A1B0BQW2|A0A1B0BQW2_9MUSC	Ribosomal protein L19 OS=Glossina palpalis gambiensis PE=3 SV=1	IPR000196:Ribosomal protein L19/L19e	GO:0003735	structural constituent of ribosome	path:ko03010	Ribosome
evm.model.Contig11.191	7190.79	6769.37	6447.56	4432.73	4817.16	4679.17	3203.53	2803.41	2769.5	1577.28	1209.37	1478.69	1854.52	1648.06	1689.34	RpL24	RL24_DROME	60S ribosomal protein L24 OS=Drosophila melanogaster GN=RpL24 PE=1 SV=1	tr|W8B8G9|W8B8G9_CERCA	60S ribosomal protein L24 (Fragment) OS=Ceratitis capitata GN=RL24 PE=2 SV=1	IPR000988:Ribosomal protein L24e-related			path:ko03010	Ribosome
evm.model.Contig59.24	7166.93	7076.98	6941.3	3860.9	4263.76	4174.09	3269.66	2986.23	2871.51	1413.26	1045.15	1275.41	1703.53	1352.79	1660.15	RpL10Ab	R10AB_DROME	60S ribosomal protein L10a-2 OS=Drosophila melanogaster GN=RpL10Ab PE=1 SV=2	tr|A0A034WXR5|A0A034WXR5_BACDO	Ribosomal protein OS=Bactrocera dorsalis GN=R10AB PE=3 SV=1	IPR028364:Ribosomal protein L1/ribosomal biogenesis protein			path:ko03010	Ribosome
evm.model.Contig5.579	4628.8	4334.26	4448	4045.36	4996.43	5169.4	2893.07	3795.56	3453.01	1345.52	1293.31	1342.12	1734.79	1622.58	1631.01	awd	NDKA_DROME	Nucleoside diphosphate kinase OS=Drosophila melanogaster GN=awd PE=1 SV=3	tr|A0A0L0CMX9|A0A0L0CMX9_LUCCU	Nucleoside diphosphate kinase OS=Lucilia cuprina GN=FF38_00252 PE=3 SV=1	IPR034907:Nucleoside diphosphate kinase-like domain	GO:0004550	nucleoside diphosphate kinase activity	path:ko00230,path:ko00240,path:ko00983,path:ko04016	Purine metabolism|Pyrimidine metabolism|Drug metabolism - other enzymes|MAPK signaling pathway - plant
evm.model.Contig32.202	5540.55	5101.71	5144.4	3691.5	4044.76	3801.51	2948.22	2754.53	2756.91	1388.03	1187.81	1436.82	1784.8	1611.08	1625.96	RpS12	RS12_DROME	40S ribosomal protein S12 OS=Drosophila melanogaster GN=RpS12 PE=1 SV=2	tr|A0A1L8EHI8|A0A1L8EHI8_HAEIR	40S ribosomal protein S12 OS=Haematobia irritans PE=3 SV=1	IPR000530:Ribosomal protein S12e	GO:0003735	structural constituent of ribosome	path:ko03010	Ribosome
evm.model.Contig37.138	3.31429	2.14727	4.97743	11.8527	10.63	8.77294	149.203	55.082	301.337	2706.24	2981.62	3080.69	1428.82	1730.15	1619.85	nt5c2	TRF_SARPE	Transferrin OS=Sarcophaga peregrina PE=1 SV=1	tr|A0A0L0C0K4|A0A0L0C0K4_LUCCU	Transferrin OS=Lucilia cuprina GN=FF38_08124 PE=3 SV=1	IPR001156:Transferrin-like domain
evm.model.Contig1274.2	1.1053	0.0168902	1.94502	3.07096	1.24333	1.18816	4.22331	47.9591	277.352	3098.09	2923.35	4230.54	1081.23	1177.33	1611.29	rcc2	ARY1_CALVI	Arylphorin subunit A4 OS=Calliphora vicina PE=2 SV=1	tr|O18321|O18321_CALVI	Arylphorin OS=Calliphora vicina PE=2 SV=1	IPR013788:Hemocyanin/hexamerin
evm.model.Contig11.389	4070.68	4433.73	4809.91	2108.45	2297.19	2109.22	2508.8	2686.06	2520.59	1624.88	1203.9	1499.62	1609.56	1479.96	1602.84	EF2	EF2_DROME	Elongation factor 2 OS=Drosophila melanogaster GN=EF2 PE=1 SV=4	tr|A0A0L0C5C9|A0A0L0C5C9_LUCCU	Elongation factor 2 OS=Lucilia cuprina GN=FF38_01361 PE=4 SV=1	IPR000640:Elongation factor EFG, domain V-like	GO:0005525	GTP binding	path:ko04152,path:ko04921	AMPK signaling pathway|Oxytocin signaling pathway
evm.model.Contig61.65	7078.1	6574.92	6707.63	3642.49	3883.23	3845.99	2922.62	2815.14	2711.45	1455.95	1195.2	1401.52	1687.57	1463.1	1602.46	RpL11	RL11_DROME	60S ribosomal protein L11 OS=Drosophila melanogaster GN=RpL11 PE=1 SV=2	tr|A0A1L8EF71|A0A1L8EF71_HAEIR	Putative 60s ribosomal protein l11 OS=Haematobia irritans PE=3 SV=1	IPR031309:Ribosomal protein L5, C-terminal			path:ko03010	Ribosome
evm.model.Contig106.64	7531.43	6987.02	7011.27	3649.74	3877.25	3958.58	2843.33	2920.01	2793.06	1592.38	1147.09	1415.05	1776.96	1569.7	1593.52	RpS24	RS24_SPOFR	40S ribosomal protein S24 OS=Spodoptera frugiperda GN=RpS24 PE=2 SV=1	tr|A0A0L0C4J2|A0A0L0C4J2_LUCCU	40S ribosomal protein S24 OS=Lucilia cuprina GN=FF38_02649 PE=3 SV=1	IPR001976:Ribosomal protein S24e	GO:0003735	structural constituent of ribosome	path:ko03010	Ribosome
evm.model.Contig37.85	380.647	365.024	360.169	122.211	181.322	159.161	225.879	325.198	294.855	225.359	94.95	265.182	1578.75	1471.23	1584.43	SHM2	GLYM2_ARATH	Serine hydroxymethyltransferase 2, mitochondrial OS=Arabidopsis thaliana GN=SHM2 PE=2 SV=2	tr|A0A0L0C8L3|A0A0L0C8L3_LUCCU	Serine hydroxymethyltransferase (Fragment) OS=Lucilia cuprina GN=FF38_04911 PE=3 SV=1	IPR001085:Serine hydroxymethyltransferase	GO:0004372	glycine hydroxymethyltransferase activity	path:ko00260,path:ko00460,path:ko00630,path:ko00670,path:ko00680,path:ko01523	Glycine, serine and threonine metabolism|Cyanoamino acid metabolism|Glyoxylate and dicarboxylate metabolism|One carbon pool by folate|Methane metabolism|Antifolate resistance
evm.model.Contig34.11	5262.82	5273.46	4700.22	3358.87	3768	3761.91	2782.93	2506.6	2422.88	1417.6	1048.85	1303.52	1645.72	1418.36	1584.16	RpS16	RS16_DROME	40S ribosomal protein S16 OS=Drosophila melanogaster GN=RpS16 PE=1 SV=1	tr|A0A0L0CIW2|A0A0L0CIW2_LUCCU	40S ribosomal protein S16 OS=Lucilia cuprina GN=FF38_12472 PE=3 SV=1	IPR000754:Ribosomal protein S9	GO:0003735	structural constituent of ribosome	path:ko03010	Ribosome
evm.model.Contig31.201	5729.44	5462.37	5740.28	3084.13	3377.4	3340.54	2690.27	2616.37	2436.9	1269.03	1009.54	1266.69	1633.83	1468.35	1567.44	RpL17	RL17_DROME	60S ribosomal protein L17 OS=Drosophila melanogaster GN=RpL17 PE=1 SV=1	tr|A0A0L0BPJ7|A0A0L0BPJ7_LUCCU	60S ribosomal protein L17 OS=Lucilia cuprina GN=FF38_08357 PE=3 SV=1	IPR001063:Ribosomal protein L22/L17	GO:0003735	structural constituent of ribosome	path:ko03010	Ribosome
evm.model.Contig195.2	7911.8	7200.6	7023.5	3309.71	3663.37	3487.88	2772.26	2690.93	2637.06	1428.97	1020.35	1312.72	1612.35	1495.61	1542.85	RpLP2	RLA2_DROME	60S acidic ribosomal protein P2 OS=Drosophila melanogaster GN=RpLP2 PE=1 SV=1	tr|A0A1L8E9A7|A0A1L8E9A7_HAEIR	Putative acidic ribosomal protein (Fragment) OS=Haematobia irritans PE=3 SV=1				path:ko03010	Ribosome
evm.model.Contig99.36	5356.45	5238.82	5126.78	3645.42	3844.01	3933.05	2685.47	2637.2	2550.58	1392.26	1102.07	1226.92	1616.68	1383.69	1533.06	RpS10b	RS10B_DROME	40S ribosomal protein S10b OS=Drosophila melanogaster GN=RpS10b PE=1 SV=2	tr|A0A0L0BT67|A0A0L0BT67_LUCCU	40S ribosomal protein S10b OS=Lucilia cuprina GN=FF38_01057 PE=4 SV=1	IPR005326:Plectin/S10, N-terminal			path:ko03010	Ribosome
evm.model.Contig53.30	420.244	468.206	468.62	145.348	166.44	242.598	153.574	178.045	295.956	313.296	1478.28	207.069	1523.21	1501.4	1519.71	RGN	RGN_BOVIN	Regucalcin OS=Bos taurus GN=RGN PE=2 SV=1	tr|Q9NDP1|Q9NDP1_SARPE	Anterior fat body protein OS=Sarcophaga peregrina GN=AFP PE=2 SV=1	IPR013658:SMP-30/Gluconolactonase/LRE-like region
evm.model.Contig11.180	6666.25	6533.71	6532.82	3228.52	3653.66	3440.08	2855.77	2867.01	2740.57	1380.67	1197.07	1287.71	1605.62	1354.21	1500.36	RpL7	RL7_DROME	60S ribosomal protein L7 OS=Drosophila melanogaster GN=RpL7 PE=1 SV=2	tr|A0A0L0CE16|A0A0L0CE16_LUCCU	60S ribosomal protein L7 OS=Lucilia cuprina GN=FF38_07455 PE=4 SV=1	IPR016082:Ribosomal protein L30, ferredoxin-like fold domain			path:ko03010	Ribosome
evm.model.Contig25.104	7336.99	6921.5	6844.61	3476.59	3836.81	3899.99	2803.96	2734.13	2566.69	1374.62	1019.13	1176.65	1574.1	1354.67	1499.87	RpL34	RL34_AEDAL	60S ribosomal protein L34 OS=Aedes albopictus GN=RpL34 PE=2 SV=2	tr|A0A1A9WW85|A0A1A9WW85_9MUSC	Uncharacterized protein OS=Glossina brevipalpis PE=3 SV=1	IPR008195:Ribosomal protein L34Ae	GO:0003735	structural constituent of ribosome	path:ko03010	Ribosome
evm.model.Contig134.16	6026.23	6069.32	5874.86	3709.25	4202.82	3985.03	2883.76	2870.05	2845.5	1328.76	970.544	1215.16	1594.62	1406.28	1490.98	RpS17	RS17_DROME	40S ribosomal protein S17 OS=Drosophila melanogaster GN=RpS17 PE=1 SV=2	tr|A0A0L0CDR8|A0A0L0CDR8_LUCCU	40S ribosomal protein S17 OS=Lucilia cuprina GN=FF38_02680 PE=3 SV=1	IPR001210:Ribosomal protein S17e	GO:0003735	structural constituent of ribosome	path:ko03010	Ribosome
evm.model.Contig61.23	6001.55	5108.94	4834.23	3680.22	4119.31	4020.83	2751.57	2614.3	2493.25	1473.45	1082.14	1377.39	1551.82	1396.53	1490.92	RpS26	RS26_DROME	40S ribosomal protein S26 OS=Drosophila melanogaster GN=RpS26 PE=1 SV=1	tr|A0A0L0CIN7|A0A0L0CIN7_LUCCU	40S ribosomal protein S26 OS=Lucilia cuprina GN=FF38_08211 PE=3 SV=1	IPR000892:Ribosomal protein S26e	GO:0003735	structural constituent of ribosome	path:ko03010	Ribosome
evm.model.Contig37.50	7971.2	7819.71	7830.07	4328.63	5033.41	4865.96	3332.39	3533.87	3258.55	1171.72	855.314	983.469	1668.62	1441.04	1449.11	sta	RSSA_DROWI	40S ribosomal protein SA OS=Drosophila willistoni GN=sta PE=3 SV=1	tr|A0A0L0CAX2|A0A0L0CAX2_LUCCU	40S ribosomal protein SA OS=Lucilia cuprina GN=FF38_04894 PE=3 SV=1	IPR032281:40S ribosomal protein SA, C-terminal domain	GO:0003735	structural constituent of ribosome	path:ko03010	Ribosome
evm.model.Contig152.4	7364.81	6413.76	6769.97	2912.64	3154.94	3166.62	2293.72	2406.17	2315.29	1281.02	924.625	1146.11	1563.57	1348.89	1443.34	Fau	RS30_RAT	40S ribosomal protein S30 OS=Rattus norvegicus GN=Fau PE=1 SV=1	tr|A0A0L0BXS6|A0A0L0BXS6_LUCCU	40S ribosomal protein S30 OS=Lucilia cuprina GN=FF38_07880 PE=3 SV=1	IPR006846:Ribosomal protein S30	GO:0003735	structural constituent of ribosome	path:ko03010	Ribosome
evm.model.Contig119.55	5509.11	5506.88	5639.1	3186.61	3458.33	3405.46	2563.67	2423.81	2355.26	1341.83	1022.85	1268.72	1548.06	1356.34	1428.64	RpL13	RL13_DROME	60S ribosomal protein L13 OS=Drosophila melanogaster GN=RpL13 PE=1 SV=1	tr|T1P7X9|T1P7X9_MUSDO	60S ribosomal protein L13 OS=Musca domestica GN=101889549 PE=2 SV=1	IPR001380:Ribosomal protein L13e	GO:0003735	structural constituent of ribosome	path:ko03010	Ribosome
evm.model.Contig6.609	7128.7	5676.33	6145.27	3064.58	3332.86	3181.42	2631.43	2777.87	2550.38	1269.66	942.471	1001.56	1557.23	1464.37	1426.49	RpS23	RS23_DROME	40S ribosomal protein S23 OS=Drosophila melanogaster GN=RpS23 PE=1 SV=1	tr|W8C1M7|W8C1M7_CERCA	40S ribosomal protein S23 (Fragment) OS=Ceratitis capitata GN=RS23 PE=2 SV=1	IPR005680:Ribosomal protein S23, eukaryotic/archaeal	GO:0003735	structural constituent of ribosome	path:ko03010	Ribosome
evm.model.Contig44.39	4935.13	5299.61	5859.08	1804.39	2309.68	1841.02	2158.28	2364.11	2043.85	2216.35	976.637	1937.8	1617.04	1507.06	1414.25	Hsc70-4	HSP7D_DROME	Heat shock 70 kDa protein cognate 4 OS=Drosophila melanogaster GN=Hsc70-4 PE=1 SV=3	tr|A0A0L0BPQ0|A0A0L0BPQ0_LUCCU	Heat shock 70 kDa protein cognate 4 OS=Lucilia cuprina GN=FF38_14242 PE=3 SV=1	IPR013126:Heat shock protein 70 family			path:ko03040,path:ko04010,path:ko04141,path:ko04144,path:ko04213,path:ko04612,path:ko04915,path:ko05134,path:ko05145,path:ko05162,path:ko05164,path:ko05169	Spliceosome|MAPK signaling pathway|Protein processing in endoplasmic reticulum|Endocytosis|Longevity regulating pathway - multiple species|Antigen processing and presentation|Estrogen signaling pathway|Legionellosis|Toxoplasmosis|Measles|Influenza A|Epstein-Barr virus infection
evm.model.Contig28.182	5366.55	5379.26	5599.15	2900.84	3178.47	3096.11	2404.36	2426.1	2271.19	1177.37	899.433	1087.31	1479.96	1305.21	1393.86	RpS4	RS4_DROME	40S ribosomal protein S4 OS=Drosophila melanogaster GN=RpS4 PE=1 SV=2	tr|A0A0L0CHG6|A0A0L0CHG6_LUCCU	40S ribosomal protein S4 OS=Lucilia cuprina GN=FF38_09303 PE=3 SV=1	IPR013843:Ribosomal protein S4e, N-terminal	GO:0003723	RNA binding	path:ko03010	Ribosome
evm.model.Contig6.338	287.155	292.255	264.838	613.685	480.284	373.702	476.461	587.78	680.404	673.899	1286.38	913.569	1747.52	888.148	1372.2				tr|A0A1L8EFN8|A0A1L8EFN8_HAEIR	Putative retrotransposon gag protein OS=Haematobia irritans PE=4 SV=1
evm.model.Contig35.111	8603.79	8052.43	8325.65	3193.54	3516.02	3444.63	2617.63	2606.01	2580.38	1296.46	1044.19	1213.16	1609.28	1369.06	1361.02	RpLP1	RLA1_DROME	60S acidic ribosomal protein P1 OS=Drosophila melanogaster GN=RpLP1 PE=1 SV=2	tr|B4KFI9|B4KFI9_DROMO	Uncharacterized protein OS=Drosophila mojavensis GN=Dmoj\GI21657 PE=3 SV=1				path:ko03010	Ribosome
evm.model.Contig61.62	1286.36	1551.77	1440.19	2319.85	2387.56	2259.41	2323.26	1999.41	2273.93	1567.92	1702.8	1307.48	1417.01	1631.39	1350.21	DHX35	TBB1_GLOMM	Tubulin beta-1 chain OS=Glossina morsitans morsitans PE=2 SV=1	tr|T1DI49|T1DI49_9DIPT	Tubulin beta chain OS=Psorophora albipes PE=2 SV=1	IPR000217:Tubulin	GO:0005874	microtubule	path:ko04145,path:ko04540,path:ko05130	Phagosome|Gap junction|Pathogenic Escherichia coli infection
evm.model.Contig61.78	1159.13	1140.33	1329.82	481.777	530.425	494.353	691.98	800.763	751.388	797.353	518.101	813.53	1312.24	1247.59	1324.45	pAbp	PABP_DROME	Polyadenylate-binding protein OS=Drosophila melanogaster GN=pAbp PE=1 SV=3	tr|B4P4R4|B4P4R4_DROYA	Polyadenylate-binding protein OS=Drosophila yakuba GN=Dyak\GE11925 PE=3 SV=1	IPR002343:Paraneoplastic encephalomyelitis antigen	GO:0003676	nucleic acid binding	path:ko03013,path:ko03015,path:ko03018	RNA transport|mRNA surveillance pathway|RNA degradation
evm.model.Contig15.109	6056.21	5998.85	5946.75	3085.75	3312.47	3163.5	2469.95	2497.27	2329.37	1162.01	868.686	1061.78	1414.53	1206.91	1323.45	RPL6	RL6_CHILA	60S ribosomal protein L6 OS=Chinchilla lanigera GN=RPL6 PE=2 SV=3	tr|A0A1L8EHS8|A0A1L8EHS8_HAEIR	Putative 60s ribosomal protein l6 (Fragment) OS=Haematobia irritans PE=4 SV=1	IPR000915:60S ribosomal protein L6E	GO:0003735	structural constituent of ribosome	path:ko03010	Ribosome
evm.model.Contig24.163	4204.59	3811.26	4123.51	3036.83	3776.89	3976.99	2059.45	1545.9	2174.46	1167.21	946.66	1141.23	1191.74	1048.93	1301.91				tr|B4MMU2|B4MMU2_DROWI	Uncharacterized protein OS=Drosophila willistoni GN=Dwil\GK17575 PE=3 SV=1	IPR022801:Ribosomal protein S4/S9	GO:0003723	RNA binding	path:ko03010	Ribosome
evm.model.Contig34.186	5736.93	5612.55	5533.07	3125.89	3275.55	3358.07	2415.82	2389.29	2266.86	1310.4	953.852	1210	1481.91	1256.64	1301.45	RpL31	RL31_DROVI	60S ribosomal protein L31 OS=Drosophila virilis GN=RpL31 PE=3 SV=1	tr|B4LJ22|B4LJ22_DROVI	Ribosomal protein L31 OS=Drosophila virilis GN=RpL31 PE=4 SV=1	IPR000054:Ribosomal protein L31e	GO:0003735	structural constituent of ribosome	path:ko03010	Ribosome
evm.model.Contig108.69	154.702	147.088	135.021	71.0386	112.879	80.7647	409.122	566.662	512.878	1068.33	556.752	1125.41	1479.78	1864.22	1283.87	SLC26A11	ML1P_MANSE	MD-2-related lipid-recognition protein OS=Manduca sexta PE=1 SV=1	tr|A0A0L0CFN3|A0A0L0CFN3_LUCCU	Uncharacterized protein OS=Lucilia cuprina GN=FF38_00563 PE=4 SV=1	IPR003172:MD-2-related lipid-recognition domain			path:ko04142,path:ko04979	Lysosome|Cholesterol metabolism
evm.model.Contig7.457	5399.25	5892.98	5942.41	2958.94	3183.14	2981.38	2620.36	2650.88	2581.18	1122.84	876.869	1054.9	1426.18	1124.59	1282.41	Rack1	GBLP_DROME	Guanine nucleotide-binding protein subunit beta-like protein OS=Drosophila melanogaster GN=Rack1 PE=1 SV=2	tr|A0A1A9X8A0|A0A1A9X8A0_GLOFF	Uncharacterized protein OS=Glossina fuscipes fuscipes PE=4 SV=1	IPR020472:G-protein beta WD-40 repeat	GO:0005515	protein binding	path:ko05162	Measles
evm.model.Contig15.188	2885.78	2910.85	3217.63	1358.4	1529.8	1414.9	1834.87	1860.35	1804.78	1245.01	885.004	1182.74	1331.89	1197.4	1271.42	Ef1gamma	EF1G_DROME	Elongation factor 1-gamma OS=Drosophila melanogaster GN=Ef1gamma PE=2 SV=2	tr|A0A0L0CHP6|A0A0L0CHP6_LUCCU	Elongation factor 1-gamma OS=Lucilia cuprina GN=FF38_14147 PE=4 SV=1	IPR001662:Translation elongation factor EF1B, gamma chain, conserved	GO:0005515	protein binding	path:ko05134	Legionellosis
evm.model.Contig48.105	4887.62	5281.74	5359.36	2744.19	2961.88	2836.4	2304.85	2282.19	2151.93	1124.06	896.525	1012.64	1410.06	1231.37	1268.31	RpL4	RL4_DROME	60S ribosomal protein L4 OS=Drosophila melanogaster GN=RpL4 PE=1 SV=2	tr|A0A1L8EF74|A0A1L8EF74_HAEIR	Putative 60s ribosomal protein l4 OS=Haematobia irritans PE=4 SV=1	IPR025755:60S ribosomal protein L4, C-terminal domain	GO:0003735	structural constituent of ribosome	path:ko03010	Ribosome
evm.model.Contig45.192	5620.31	4992.76	4765.9	2846.8	3301.07	3136.48	2280.29	2320.91	2179.4	1027.2	846.296	923.204	1278.3	1107.55	1217.97	RpL15	RL15_DROME	60S ribosomal protein L15 OS=Drosophila melanogaster GN=RpL15 PE=1 SV=1	tr|A0A0L0BYX6|A0A0L0BYX6_LUCCU	Ribosomal protein L15 OS=Lucilia cuprina GN=FF38_04232 PE=3 SV=1	IPR000439:Ribosomal protein L15e	GO:0003735	structural constituent of ribosome	path:ko03010	Ribosome
evm.model.Contig29.37	10.8388	11.4863	8.25174	12.5204	12.7777	8.41103	4.62662	0.845639	2.08702	115.834	94.6143	71.4834	2115.65	1830.75	1217.63	Hsp27	HSP27_DROME	Heat shock protein 27 OS=Drosophila melanogaster GN=Hsp27 PE=1 SV=2	tr|A1E385|A1E385_SARCR	25 kDa small heat shock protein OS=Sarcophaga crassipalpis PE=2 SV=1	IPR001436:Alpha crystallin/Heat shock protein
evm.model.Contig44.193	5018.45	4892.16	4895.76	2781.75	2892.88	2932.29	2063.69	1975.82	1918.19	1055.93	755.621	944.031	1226.14	1077.77	1193.45	RPL35A	RL35A_PONAB	60S ribosomal protein L35a OS=Pongo abelii GN=RPL35A PE=3 SV=1	tr|A0A0L0BYR2|A0A0L0BYR2_LUCCU	Uncharacterized protein (Fragment) OS=Lucilia cuprina GN=FF38_04636 PE=4 SV=1	IPR001780:Ribosomal protein L35A	GO:0003735	structural constituent of ribosome	path:ko03010	Ribosome
evm.model.Contig6.789	392.948	378.941	347.723	290.904	328.997	331.322	513.666	625.814	705.158	398.543	357.773	431.51	1309.4	1473.82	1167.26	cyn-5	CYP5_CAEEL	Peptidyl-prolyl cis-trans isomerase 5 OS=Caenorhabditis elegans GN=cyn-5 PE=1 SV=2	tr|A0A0L0BPH9|A0A0L0BPH9_LUCCU	Peptidyl-prolyl cis-trans isomerase OS=Lucilia cuprina GN=FF38_03167 PE=3 SV=1	IPR002130:Cyclophilin-type peptidyl-prolyl cis-trans isomerase domain	GO:0000413	protein peptidyl-prolyl isomerization
evm.model.Contig137.9	4698.78	4706.64	5184.39	2349.04	2591.6	2457.99	1952.35	1973.39	1862.54	1036.66	756.13	972.579	1270.41	1123.91	1166.35	Rpl23a	RL23A_RAT	60S ribosomal protein L23a OS=Rattus norvegicus GN=Rpl23a PE=2 SV=1	tr|A0A0L0BTA7|A0A0L0BTA7_LUCCU	Uncharacterized protein OS=Lucilia cuprina GN=FF38_10722 PE=3 SV=1	IPR013025:Ribosomal protein L25/L23	GO:0003735	structural constituent of ribosome	path:ko03010	Ribosome
evm.model.Contig3.1167	4660.13	3974.98	4004.55	2671.52	3035.68	2906.4	2061.43	2087.24	1974.11	1046.6	825.1	1026.58	1342.28	1130.53	1157.63	RpL37A	RL37A_DROME	60S ribosomal protein L37a OS=Drosophila melanogaster GN=RpL37A PE=1 SV=3	tr|A0A1L8EHP1|A0A1L8EHP1_HAEIR	Putative 60s ribosomal protein l37a OS=Haematobia irritans PE=3 SV=1	IPR002674:Ribosomal protein L37ae	GO:0003735	structural constituent of ribosome	path:ko03010	Ribosome
evm.model.Contig58.154	5007.61	4700.62	4751.59	3041.55	3243.99	3124	2276.98	2208.7	2150.09	1100.88	864.536	967.345	1293.15	1077.46	1149.87	RpL8	RL8_DROME	60S ribosomal protein L8 OS=Drosophila melanogaster GN=RpL8 PE=1 SV=1	tr|A0A1L8EHM7|A0A1L8EHM7_HAEIR	Putative 60s ribosomal protein l8 (Fragment) OS=Haematobia irritans PE=4 SV=1	IPR022669:Ribosomal protein L2, C-terminal	GO:0003735	structural constituent of ribosome	path:ko03010	Ribosome
evm.model.Contig8.272	1.38371	0.179537	0.207731	2.44093	0.439756	1.99628	0	0.227901	0.871135	2958.47	970.437	2892.87	1172.68	1140.36	1145.24	Pde6	CYTA_SARPE	Sarcocystatin-A OS=Sarcophaga peregrina PE=1 SV=1	tr|B4NAL9|B4NAL9_DROWI	Uncharacterized protein OS=Drosophila willistoni GN=Dwil\GK11352 PE=4 SV=1	IPR000010:Cystatin domain	GO:0004869	cysteine-type endopeptidase inhibitor activity
evm.model.Contig18.128	1.55682	0	0	0.70621	0.69688	0.700753	0	0	0	0.725234	0	0	737.818	700.858	1143.15	mig-6	VKT39_HAPSC	U15-theraphotoxin-Hs1a OS=Haplopelma schmidti PE=2 SV=1	tr|A0A0L0BRU8|A0A0L0BRU8_LUCCU	Uncharacterized protein OS=Lucilia cuprina GN=FF38_12133 PE=4 SV=1	IPR002223:Pancreatic trypsin inhibitor Kunitz domain	GO:0004867	serine-type endopeptidase inhibitor activity
evm.model.Contig60.75	4296.89	4330.1	4425.32	2790.78	2845.63	2794.86	2076.21	2008.19	1890.76	1010.27	766.617	921.891	1223.47	1080.99	1129.49	RpS6	RS6_DROME	40S ribosomal protein S6 OS=Drosophila melanogaster GN=RpS6 PE=1 SV=1	tr|A0A0L0BU24|A0A0L0BU24_LUCCU	40S ribosomal protein S6 OS=Lucilia cuprina GN=FF38_02829 PE=3 SV=1	IPR001377:Ribosomal protein S6e	GO:0003735	structural constituent of ribosome	path:ko01521,path:ko03010,path:ko04066,path:ko04150,path:ko04151,path:ko04371,path:ko04714,path:ko04910,path:ko05205	EGFR tyrosine kinase inhibitor resistance|Ribosome|HIF-1 signaling pathway|mTOR signaling pathway|PI3K-Akt signaling pathway|Apelin signaling pathway|Thermogenesis|Insulin signaling pathway|Proteoglycans in cancer
evm.model.Contig11.249	4172.62	4160.21	4188.62	2135.16	2309.77	2145.11	2061.84	2146.51	2011.91	918.441	774.845	860.296	1190.11	1053.88	1129.19	RpL5	RL5_DROME	60S ribosomal protein L5 OS=Drosophila melanogaster GN=RpL5 PE=1 SV=2	tr|A0A0L0C424|A0A0L0C424_LUCCU	60S ribosomal protein L5 OS=Lucilia cuprina GN=FF38_02344 PE=3 SV=1	IPR025607:Ribosomal protein L5 eukaryotic/L18 archaeal, C-terminal	GO:0003735	structural constituent of ribosome	path:ko03010	Ribosome
evm.model.Contig1.180	41.4696	25.1889	35.7096	1.73534	4.53103	3.81315	1.94972	8.60279	3.17296	284.863	65.8637	204.412	968.19	1224.28	1127.35	Phgdh	SERA_RAT	D-3-phosphoglycerate dehydrogenase OS=Rattus norvegicus GN=Phgdh PE=1 SV=3	tr|A0A0L0BZ96|A0A0L0BZ96_LUCCU	Uncharacterized protein OS=Lucilia cuprina GN=FF38_07585 PE=3 SV=1	IPR006140:D-isomer specific 2-hydroxyacid dehydrogenase, NAD-binding domain	GO:0008152	metabolic process	path:ko00260,path:ko00680	Glycine, serine and threonine metabolism|Methane metabolism
evm.model.Contig45.179	77.6526	66.0657	67.9502	77.5379	69.1691	63.5387	255.258	207.176	198.736	1279.47	485.479	1201.28	1172.05	1502.15	1086.5	CG44239	CATL_SARPE	Cathepsin L OS=Sarcophaga peregrina PE=1 SV=1	tr|A0A0N9ZTP4|A0A0N9ZTP4_SARPE	Cathepsin L (Fragment) OS=Sarcophaga peregrina GN=CathL PE=2 SV=1	IPR013128:Peptidase C1A	GO:0006508	proteolysis
evm.model.Contig5.234	24.7708	27.35	23.5989	38.1618	32.0406	19.4021	41.1896	38.8135	62.5984	146.686	125.514	116.046	1115.37	1185.83	1083.99	Tgfbi	BGH3_MOUSE	Transforming growth factor-beta-induced protein ig-h3 OS=Mus musculus GN=Tgfbi PE=1 SV=1	tr|A0A0L0BZY8|A0A0L0BZY8_LUCCU	Uncharacterized protein OS=Lucilia cuprina GN=FF38_12951 PE=4 SV=1	IPR011489:EMI domain	GO:0005515	protein binding
evm.model.Contig31.22	59.2788	78.0511	61.5112	70.8663	60.9046	65.7818	142.067	105.443	115.171	151.73	164.554	119.206	1264.23	1123.13	1058.81	LysD	SCP_PERVT	Sarcoplasmic calcium-binding protein OS=Perinereis vancaurica tetradentata PE=1 SV=1	tr|A0A0L0CP19|A0A0L0CP19_LUCCU	Uncharacterized protein OS=Lucilia cuprina GN=FF38_06461 PE=4 SV=1	IPR002048:EF-hand domain	GO:0005509	calcium ion binding
evm.model.Contig36.28	6324.53	5400.87	5382.52	3276.79	3600.61	3551.98	2205.59	2072.77	1999.15	968.645	740.68	914.592	1179.45	1000.12	1053.23	RpL30	RL30_SPOFR	60S ribosomal protein L30 OS=Spodoptera frugiperda GN=RpL30 PE=3 SV=1	tr|A0A0L0BZ76|A0A0L0BZ76_LUCCU	Uncharacterized protein OS=Lucilia cuprina GN=FF38_13711 PE=3 SV=1	IPR000231:Ribosomal protein L30e	GO:0003735	structural constituent of ribosome	path:ko03010	Ribosome
evm.model.Contig5.353	3723.32	4048.96	3996.92	2421.22	2685.76	2502.45	2110.94	2074.06	1931.12	961.617	751.948	824.904	1114.38	973.17	1037.23	RpL3	RL3_DROME	60S ribosomal protein L3 OS=Drosophila melanogaster GN=RpL3 PE=1 SV=3	tr|A0A1L8EHJ6|A0A1L8EHJ6_HAEIR	Putative 60s ribosomal protein l3 OS=Haematobia irritans PE=3 SV=1	IPR000597:Ribosomal protein L3	GO:0003735	structural constituent of ribosome	path:ko03010	Ribosome
evm.model.Contig34.204	1.3246	0	0.346037	0	0.614248	1.21961	0.821839	0	0	82.2383	15.3692	20.6868	822.643	967.98	1036.12	Fmnl1	LYS1_MUSDO	Lysozyme 1 OS=Musca domestica PE=1 SV=1	tr|A0A0L0BNQ5|A0A0L0BNQ5_LUCCU	Lysozyme OS=Lucilia cuprina GN=FF38_09812 PE=3 SV=1	IPR001916:Glycoside hydrolase, family 22	GO:0003796	lysozyme activity	path:ko04970	Salivary secretion
evm.model.Contig7.116	1385.54	1295.45	1145.65	656.119	976.743	815.506	4815.18	5196.17	5765.54	534.831	988.167	674.467	1095.86	1254.11	1033.37				tr|A0A0L0CG38|A0A0L0CG38_LUCCU	Uncharacterized protein OS=Lucilia cuprina GN=FF38_14353 PE=4 SV=1
evm.model.Contig6.591	5998.72	5901.91	5816.71	2743	3007.83	2942.93	2107.69	1987.08	1927.95	919.411	767.426	879.634	1126.67	944.259	1028.09	RpL23	RL23_DROME	60S ribosomal protein L23 OS=Drosophila melanogaster GN=RpL23 PE=1 SV=2	tr|A0A1W4VDN2|A0A1W4VDN2_DROFC	60S ribosomal protein L23 OS=Drosophila ficusphila GN=LOC108096887 PE=3 SV=1	IPR000218:Ribosomal protein L14P	GO:0003735	structural constituent of ribosome	path:ko03010	Ribosome
evm.model.Contig52.59	0.59104	0.290209	0.88705	0.262382	0.664947	0.526622	0.817797	0.202198	0.0643233	1.72599	2.56427	1.35747	682.793	659.706	1010.48	CSAD	CSAD_HUMAN	Cysteine sulfinic acid decarboxylase OS=Homo sapiens GN=CSAD PE=1 SV=2	tr|A0A0L0CK42|A0A0L0CK42_LUCCU	Uncharacterized protein OS=Lucilia cuprina GN=FF38_04533 PE=4 SV=1	IPR002129:Pyridoxal phosphate-dependent decarboxylase	GO:0016831	carboxy-lyase activity
evm.model.Contig2.946	507.185	281.528	429.395	102.923	117.37	89.4083	760.917	1145.4	1242.48	1041.21	399.899	1240.69	874.283	742.31	979.102	FERH	FRIH_ECHGR	Ferritin heavy chain OS=Echinococcus granulosus PE=2 SV=1	tr|A0A1L8EFK1|A0A1L8EFK1_HAEIR	Ferritin OS=Haematobia irritans PE=3 SV=1	IPR008331:Ferritin/DPS protein domain	GO:0006879	cellular iron ion homeostasis
evm.model.Contig7.607	292.997	330.304	289.867	80.4135	78.8013	123.365	182.808	199.143	312.822	95.983	132.706	96.2995	1075.29	1178.86	977.472	otsB	OTSB_MYCTU	Trehalose-phosphate phosphatase OS=Mycobacterium tuberculosis (strain ATCC 25618 / H37Rv) GN=otsB PE=1 SV=1	tr|X2J105|X2J105_9MUSC	Trehalose 6-phosphate phosphatase OS=Delia antiqua PE=2 SV=1	IPR003337:Trehalose-phosphatase	GO:0003824	catalytic activity	path:ko00500	Starch and sucrose metabolism
evm.model.Contig31.72	22.3222	22.1299	21.9508	77.5977	38.5686	62.2363	32.4312	20.9298	19.9985	15.1719	15.3073	9.63075	1008.3	513.086	975.988	spns1	SPNS1_DANRE	Protein spinster homolog 1 OS=Danio rerio GN=spns1 PE=2 SV=1	tr|A0A0L0CKV0|A0A0L0CKV0_LUCCU	Uncharacterized protein (Fragment) OS=Lucilia cuprina GN=FF38_08100 PE=3 SV=1	IPR011701:Major facilitator superfamily	GO:0016021	integral component of membrane
evm.model.Contig1.480	667.958	636.512	536.909	717	715.265	621.943	584.858	689.86	911.819	427.8	742.245	269.582	1215.41	1196.88	964.895	Eno	ENO_DROME	Enolase OS=Drosophila melanogaster GN=Eno PE=1 SV=2	tr|A0A1I8NCM7|A0A1I8NCM7_MUSDO	Uncharacterized protein OS=Musca domestica GN=101894089 PE=3 SV=1	IPR020811:Enolase, N-terminal	GO:0000015	phosphopyruvate hydratase complex	path:ko00010,path:ko00680,path:ko03018,path:ko04066	Glycolysis / Gluconeogenesis|Methane metabolism|RNA degradation|HIF-1 signaling pathway
evm.model.Contig60.132	2995.27	2540.89	2468.23	3037.79	3296.15	2995.58	3475.41	3208.44	3239.52	1399.35	2417.79	1069.03	1011.84	1002.47	946.233	cox12	COX12_SCHPO	Cytochrome c oxidase subunit 6B OS=Schizosaccharomyces pombe (strain 972 / ATCC 24843) GN=cox12 PE=3 SV=2	tr|B4L6V0|B4L6V0_DROMO	Cytochrome c oxidase subunit OS=Drosophila mojavensis GN=Dmoj\GI16427 PE=3 SV=1	IPR003213:Cytochrome c oxidase, subunit VIb	GO:0005739	mitochondrion	path:ko00190,path:ko04260,path:ko04714,path:ko04932,path:ko05010,path:ko05012,path:ko05016	Oxidative phosphorylation|Cardiac muscle contraction|Thermogenesis|Non-alcoholic fatty liver disease (NAFLD)|Alzheimer's disease|Parkinson's disease|Huntington's disease
evm.model.Contig28.7	4207.55	4472.86	4522.73	2178.88	2517.33	2539	1925.87	2105.63	1982.6	941.515	692.814	792.252	1065	874.01	945.943	RpLP0	RLA0_CERCA	60S acidic ribosomal protein P0 OS=Ceratitis capitata GN=RpLP0 PE=3 SV=1	tr|Q9NHP0|Q9NHP0_SARCR	60S acidic ribosomal protein P0 OS=Sarcophaga crassipalpis PE=2 SV=1	IPR001790:Ribosomal protein L10P	GO:0005622	intracellular	path:ko03010	Ribosome
evm.model.Contig2.945	429.128	222.543	344.296	81.1227	83.238	62.6929	643.692	945.004	889.218	949.433	307.043	1199.79	865.943	829.623	905.784	FERH	FRI_AEDAE	Ferritin subunit OS=Aedes aegypti GN=FERH PE=1 SV=2	tr|A0A1L8EHV5|A0A1L8EHV5_HAEIR	Ferritin OS=Haematobia irritans PE=3 SV=1	IPR008331:Ferritin/DPS protein domain	GO:0006826	iron ion transport	path:ko04216,path:ko04217,path:ko04978	Ferroptosis|Necroptosis|Mineral absorption
evm.model.Contig40.192	319.215	288.97	281.458	186.557	169.774	174.916	218.874	204.249	217.037	538.775	257.068	453.513	790.899	751.844	895.77	ATFC	ATFC_BOMMO	Activating transcription factor of chaperone OS=Bombyx mori GN=ATFC PE=2 SV=1	tr|A0A0L0C4W8|A0A0L0C4W8_LUCCU	Uncharacterized protein OS=Lucilia cuprina GN=FF38_13296 PE=4 SV=1	IPR004827:Basic-leucine zipper domain	GO:0003700	transcription factor activity, sequence-specific DNA binding	path:ko04010,path:ko04022,path:ko04137,path:ko04141,path:ko04151,path:ko04210,path:ko04211,path:ko04212,path:ko04214,path:ko04261,path:ko04668,path:ko04720,path:ko04722,path:ko04725,path:ko04728,path:ko04911,path:ko04912,path:ko04915,path:ko04918,path:ko04922,path:ko04925,path:ko04926,path:ko04927,path:ko04932,path:ko04934,path:ko05030,path:ko05031,path:ko05034,path:ko05161,path:ko05166,path:ko05…	MAPK signaling pathway|cGMP-PKG signaling pathway|Mitophagy - animal|Protein processing in endoplasmic reticulum|PI3K-Akt signaling pathway|Apoptosis|Longevity regulating pathway|Longevity regulating pathway - worm|Apoptosis - fly|Adrenergic signaling in cardiomyocytes|TNF signaling pathway|Long-term potentiation|Neurotrophin signaling pathway|Cholinergic synapse|Dopaminergic synapse|Insulin secr…
evm.model.Contig82.29	239.553	229.457	252.681	87.2828	120.768	107.418	23.8354	50.4481	33.6321	258.024	132.867	355.459	935.812	731.993	894.138	ATIC	PUR9_HUMAN	Bifunctional purine biosynthesis protein PURH OS=Homo sapiens GN=ATIC PE=1 SV=3	tr|T1PF22|T1PF22_MUSDO	AICARFT/IMPCHase bienzyme OS=Musca domestica PE=2 SV=1	IPR002695:AICARFT/IMPCHase bienzyme	GO:0003937	IMP cyclohydrolase activity	path:ko00230,path:ko00670,path:ko01523	Purine metabolism|One carbon pool by folate|Antifolate resistance
evm.model.Contig9.366	197.37	156.796	174.431	469.663	430.309	265.933	1784.15	1811.54	2409.52	1636.84	1688.12	1098.13	811.802	1073.8	885.676	ENSANGG00000000821	FABP_ANOGA	Probable fatty acid-binding protein OS=Anopheles gambiae GN=ENSANGG00000000821 PE=3 SV=2	tr|A0A1I8MQH5|A0A1I8MQH5_MUSDO	Uncharacterized protein OS=Musca domestica GN=101888140 PE=3 SV=1	IPR031259:Intracellular lipid binding protein	GO:0005215	transporter activity
evm.model.Contig6.375	2342.49	2757.67	2108.48	2526.39	3088.62	2389.77	3381.85	2187.16	3150.39	2633.79	4168.65	1737.33	1042.9	1052.89	883.873	Mp20	MP20_DROME	Muscle-specific protein 20 OS=Drosophila melanogaster GN=Mp20 PE=2 SV=2	tr|A0A0L0C0X0|A0A0L0C0X0_LUCCU	Transgelin OS=Lucilia cuprina GN=FF38_07800 PE=3 SV=1	IPR001715:Calponin homology domain	GO:0005515	protein binding
evm.model.Contig6.540	163.366	170.858	137.301	928.331	773.251	1533.99	594.984	679.039	576.545	46.7783	53.8213	36.987	1218.93	79.8753	876.113	PebIII	PEB3_DROME	Ejaculatory bulb-specific protein 3 OS=Drosophila melanogaster GN=PebIII PE=1 SV=2	tr|A0A0L0BQK0|A0A0L0BQK0_LUCCU	Ejaculatory bulb-specific protein 3 OS=Lucilia cuprina GN=FF38_12914 PE=4 SV=1	IPR005055:Insect odorant-binding protein A10/Ejaculatory bulb-specific protein 3
evm.model.Contig61.19	823.04	910.344	814.173	1521.43	1571.96	1408.86	1159.48	1014.7	1012.82	1209.44	1215.21	905.166	962.315	974.343	873.986	tsr	CADF_DROME	Cofilin/actin-depolymerizing factor homolog OS=Drosophila melanogaster GN=tsr PE=1 SV=1	tr|A0A1A9WF25|A0A1A9WF25_9MUSC	Uncharacterized protein OS=Glossina brevipalpis PE=3 SV=1	IPR002108:Actin-depolymerising factor homology domain	GO:0003779	actin binding	path:ko04360,path:ko04666,path:ko04810,path:ko05133	Axon guidance|Fc gamma R-mediated phagocytosis|Regulation of actin cytoskeleton|Pertussis
evm.model.Contig5.322	2900.89	2249.61	2705.74	1052.1	1245.87	1170.31	1154.96	1241.77	1179.57	841.028	655.499	723.709	839.14	730.228	870.335	Tctp	TCTP_BOMMO	Translationally-controlled tumor protein homolog OS=Bombyx mori GN=Tctp PE=2 SV=1	tr|A0A0L0BZH6|A0A0L0BZH6_LUCCU	Uncharacterized protein OS=Lucilia cuprina GN=FF38_13553 PE=3 SV=1	IPR034737:Translationally controlled tumor protein (TCTP) domain
evm.model.Contig84.59	0.985602	0	1.05462	1.10072	0.795927	0.316775	35.2225	199.883	341.579	640.054	37.1922	461.533	723.634	279.867	869.409	Sema-1a	ARY1_CALVI	Arylphorin subunit A4 OS=Calliphora vicina PE=2 SV=1	tr|O18321|O18321_CALVI	Arylphorin OS=Calliphora vicina PE=2 SV=1	IPR013788:Hemocyanin/hexamerin
evm.model.Contig82.32	0	0.22635	0.258499	0.275028	0.544959	0.825064	0.542605	0	0	4.76827	0.265889	16.8327	832.766	696.003	863.652				tr|A0A0L0CQ46|A0A0L0CQ46_LUCCU	Uncharacterized protein OS=Lucilia cuprina GN=FF38_02764 PE=4 SV=1
evm.model.Contig11.330	299.504	270.948	273.032	569.659	589.135	509.886	491.939	563.231	532.876	774.564	763.887	629.344	951.469	863.575	848.84	chic	PROF_DROME	Profilin OS=Drosophila melanogaster GN=chic PE=1 SV=1	tr|A0A0L0C5L6|A0A0L0C5L6_LUCCU	Profilin (Fragment) OS=Lucilia cuprina GN=FF38_08084 PE=3 SV=1	IPR005455:Profilin			path:ko04013,path:ko04015,path:ko04810,path:ko05131,path:ko05132	MAPK signaling pathway - fly|Rap1 signaling pathway|Regulation of actin cytoskeleton|Shigellosis|Salmonella infection
evm.model.Contig5.306	3644.09	3644.23	3008.21	2373.8	2143	2004.18	2040.34	2173.87	1483.45	725.286	577.158	507.731	1036.14	765.463	831.369				tr|B4MMU2|B4MMU2_DROWI	Uncharacterized protein OS=Drosophila willistoni GN=Dwil\GK17575 PE=3 SV=1	IPR022801:Ribosomal protein S4/S9	GO:0005622	intracellular	path:ko03010	Ribosome
evm.model.Contig80.97	0.208289	0	0.567437	0	1.20725	0.200112	0.402233	0	0	61.4857	7.41903	8.79172	830.187	551.347	829.032				tr|A0A1I8NK04|A0A1I8NK04_MUSDO	Uncharacterized protein OS=Musca domestica GN=105262063 PE=4 SV=1	IPR000618:Insect cuticle protein	GO:0042302	structural constituent of cuticle
evm.model.Contig8.186	2.19263	1.65067	1.5931	22.2366	24.5713	10.873	2.84088	4.32044	3.34367	7.41988	9.43076	7.54457	251.787	421.049	821.468	thbs3b	CHIT_MANSE	Endochitinase OS=Manduca sexta PE=2 SV=1	tr|A0A0L0BN03|A0A0L0BN03_LUCCU	Uncharacterized protein (Fragment) OS=Lucilia cuprina GN=FF38_12552 PE=3 SV=1	IPR011583:Chitinase II	GO:0005576	extracellular region	path:ko00520	Amino sugar and nucleotide sugar metabolism
evm.model.Contig18.122	0.584848	0	0	0	0.525118	2.65075	1.12847	0	0	1.66442	2.27369	1.80958	376.095	4244.51	819.141	COL28A1	VKTD_ANEVI	U-actitoxin-Avd3p OS=Anemonia viridis PE=3 SV=1	tr|A0A0L0BRU8|A0A0L0BRU8_LUCCU	Uncharacterized protein OS=Lucilia cuprina GN=FF38_12133 PE=4 SV=1	IPR002223:Pancreatic trypsin inhibitor Kunitz domain	GO:0004867	serine-type endopeptidase inhibitor activity
evm.model.Contig10.151	1338.36	1300.73	1213.67	1141.38	1495.14	1434.82	1153	1452.38	1356.76	822.046	815.638	780.221	780.12	698.82	818.468	Cyp1	PPIA_DROME	Peptidyl-prolyl cis-trans isomerase OS=Drosophila melanogaster GN=Cyp1 PE=1 SV=2	tr|D3TMT7|D3TMT7_GLOMM	Peptidyl-prolyl cis-trans isomerase OS=Glossina morsitans morsitans PE=2 SV=1	IPR002130:Cyclophilin-type peptidyl-prolyl cis-trans isomerase domain	GO:0000413	protein peptidyl-prolyl isomerization	path:ko04020,path:ko04022,path:ko05012,path:ko05016,path:ko05145	Calcium signaling pathway|cGMP-PKG signaling pathway|Parkinson's disease|Huntington's disease|Toxoplasmosis
evm.model.Contig68.107	68.9588	59.1612	59.602	61.7801	55.5952	43.3149	122.295	95.0826	113.075	1234.93	753.765	1356.53	900.862	921.148	797.193	AAEL006169	ASPP_AEDAE	Lysosomal aspartic protease OS=Aedes aegypti GN=AAEL006169 PE=1 SV=2	tr|A0A0L0BPP9|A0A0L0BPP9_LUCCU	Uncharacterized protein OS=Lucilia cuprina GN=FF38_12118 PE=3 SV=1	IPR033144:Cathepsin D	GO:0004190	aspartic-type endopeptidase activity	path:ko04071,path:ko04140,path:ko04142,path:ko04210,path:ko04915,path:ko05152	Sphingolipid signaling pathway|Autophagy - animal|Lysosome|Apoptosis|Estrogen signaling pathway|Tuberculosis
evm.model.Contig45.180	0.261119	0	0.471033	0	0.260483	0.434792	0.425644	0	0	0.391923	1.02497	1.23672	891.408	628.816	793.54	Cp1	CATL_DROME	Cathepsin L OS=Drosophila melanogaster GN=Cp1 PE=2 SV=2	tr|A0A0L0BYU3|A0A0L0BYU3_LUCCU	Uncharacterized protein (Fragment) OS=Lucilia cuprina GN=FF38_04243 PE=3 SV=1	IPR013128:Peptidase C1A	GO:0008234	cysteine-type peptidase activity
evm.model.Contig144.33	68.265	60.5788	65.5205	44.5547	41.3108	26.6621	102.084	89.4262	87.4947	1544.88	616.392	1639.41	706.247	779.888	790.358	CTSB	CATB_HUMAN	Cathepsin B OS=Homo sapiens GN=CTSB PE=1 SV=3	tr|Q26655|Q26655_SARPE	Sarcophaga pro-cathepsin B OS=Sarcophaga peregrina PE=2 SV=1	IPR013128:Peptidase C1A	GO:0006508	proteolysis	path:ko04140,path:ko04142,path:ko04210,path:ko04612,path:ko04621,path:ko04924	Autophagy - animal|Lysosome|Apoptosis|Antigen processing and presentation|NOD-like receptor signaling pathway|Renin secretion
evm.model.Contig8.143	2749.07	2903.68	2511.58	2377.38	2657.89	2580.5	1611.67	1398.31	1505.66	644.828	494.082	577.986	816.173	701.25	778.986	RpS20	RS20_DROME	40S ribosomal protein S20 OS=Drosophila melanogaster GN=RpS20 PE=1 SV=1	tr|A0A0L0CLX0|A0A0L0CLX0_LUCCU	40S ribosomal protein S20 OS=Lucilia cuprina GN=FF38_04988 PE=3 SV=1	IPR001848:Ribosomal protein S10	GO:0003735	structural constituent of ribosome	path:ko03010	Ribosome
evm.model.Contig30.172	1111.78	1060.56	1200.8	419.06	639.75	430.261	407.406	671.124	510.211	535.614	474.574	618.015	814.099	655.168	776.709	Hsp83	HSP83_DROME	Heat shock protein 83 OS=Drosophila melanogaster GN=Hsp83 PE=1 SV=1	tr|A0A0L0CL15|A0A0L0CL15_LUCCU	Heat shock protein 83 OS=Lucilia cuprina GN=FF38_07784 PE=3 SV=1	IPR001404:Heat shock protein Hsp90 family	GO:0005524	ATP binding	path:ko04141,path:ko04151,path:ko04217,path:ko04612,path:ko04621,path:ko04626,path:ko04657,path:ko04659,path:ko04914,path:ko04915,path:ko05200,path:ko05215,path:ko05418	Protein processing in endoplasmic reticulum|PI3K-Akt signaling pathway|Necroptosis|Antigen processing and presentation|NOD-like receptor signaling pathway|Plant-pathogen interaction|IL-17 signaling pathway|Th17 cell differentiation|Progesterone-mediated oocyte maturation|Estrogen signaling pathway|Pathways in cancer|Prostate cancer|Fluid shear stress and atherosclerosis
evm.model.Contig18.116	0	0	1.2565	0	0	0	1.30958	0	0	0	0	1.31553	1423.07	827.763	765.336	COL6A3	CO6A3_HUMAN	Collagen alpha-3(VI) chain OS=Homo sapiens GN=COL6A3 PE=1 SV=5	tr|A0A0L0BPI9|A0A0L0BPI9_LUCCU	Uncharacterized protein OS=Lucilia cuprina GN=FF38_12129 PE=4 SV=1	IPR002223:Pancreatic trypsin inhibitor Kunitz domain	GO:0004867	serine-type endopeptidase inhibitor activity
evm.model.Contig34.183	46.823	44.5965	54.398	58.6317	41.1019	52.8382	209.308	145.605	221.935	920.005	462.12	823.891	751.794	697.032	754.242	DAP	DAP1_BOVIN	Death-associated protein 1 OS=Bos taurus GN=DAP PE=3 SV=3	tr|A0A0L0BNL8|A0A0L0BNL8_LUCCU	Uncharacterized protein OS=Lucilia cuprina GN=FF38_09794 PE=4 SV=1	IPR024130:DAP1/DAPL1
evm.model.Contig7.311	4352.63	3059.99	3247.8	1754.07	2122.61	1892.8	1413.58	1420.99	1282.64	694.509	541.835	623.011	829.535	752.187	750.678	RpL44	RL44_OCHTR	60S ribosomal protein L44 OS=Ochlerotatus triseriatus GN=RpL44 PE=3 SV=3	tr|A0A0L0CG21|A0A0L0CG21_LUCCU	Uncharacterized protein OS=Lucilia cuprina GN=FF38_14328 PE=3 SV=1	IPR000552:Ribosomal protein L44e	GO:0003735	structural constituent of ribosome	path:ko03010	Ribosome
evm.model.Contig84.38	1.30774	0	1.25786	1.51555	0.864737	1.6421	3.602	30.2	104.404	494.366	1111.41	1073.15	736.925	1276.1	739.134	Sema-1a	ARY1_CALVI	Arylphorin subunit A4 OS=Calliphora vicina PE=2 SV=1	tr|O18321|O18321_CALVI	Arylphorin OS=Calliphora vicina PE=2 SV=1	IPR013788:Hemocyanin/hexamerin
evm.model.Contig7.316	203.086	217.078	150.85	614.992	635.3	797.813	2792.5	1762.3	2358.93	657.655	378.819	714.654	816.487	995.178	734.321	SNX20	SBPI_NEOBL	Protease inhibitor OS=Neobellieria bullata PE=1 SV=1	tr|A0A0L0CFH8|A0A0L0CFH8_LUCCU	Uncharacterized protein OS=Lucilia cuprina GN=FF38_14330 PE=4 SV=1	IPR002223:Pancreatic trypsin inhibitor Kunitz domain	GO:0004867	serine-type endopeptidase inhibitor activity
evm.model.Contig23.27	309.42	284.059	350.483	179.709	210.561	109.28	438.762	654.805	593.72	1311.36	761.266	1481.24	577.903	918.218	727.88	MTIF2	ACO11_SPOLI	Acyl-CoA Delta(11) desaturase OS=Spodoptera littoralis PE=1 SV=1	tr|A0A1L8ECE4|A0A1L8ECE4_HAEIR	Putative fatty acid desaturase OS=Haematobia irritans PE=3 SV=1	IPR005804:Fatty acid desaturase domain	GO:0016717	oxidoreductase activity, acting on paired donors, with oxidation of a pair of donors resulting in the reduction of molecular oxygen to two molecules of water	path:ko01040,path:ko03320,path:ko04152,path:ko04212	Biosynthesis of unsaturated fatty acids|PPAR signaling pathway|AMPK signaling pathway|Longevity regulating pathway - worm
evm.model.Contig3.1054	584.417	390.658	632.373	59.9047	71.7636	76.7823	121.761	338.426	223.354	303.021	82.9971	277.185	646.654	627.157	723.965	Gs1	GLNA1_DROME	Glutamine synthetase 1, mitochondrial OS=Drosophila melanogaster GN=Gs1 PE=2 SV=3	tr|A0A0L0CBW9|A0A0L0CBW9_LUCCU	Glutamine synthetase OS=Lucilia cuprina GN=FF38_13679 PE=3 SV=1	IPR008147:Glutamine synthetase, beta-Grasp domain	GO:0004356	glutamate-ammonia ligase activity	path:ko00220,path:ko00250,path:ko00630,path:ko00910,path:ko02020,path:ko04217,path:ko04724,path:ko04727	Arginine biosynthesis|Alanine, aspartate and glutamate metabolism|Glyoxylate and dicarboxylate metabolism|Nitrogen metabolism|Two-component system|Necroptosis|Glutamatergic synapse|GABAergic synapse
evm.model.Contig36.184	5772.95	5807.57	6462.47	3754.28	3996.93	3298.41	5004.9	5174.38	4919.48	1376.73	1880.9	1081.88	771.386	677.455	714.69	sesB	ADT_DROME	ADP,ATP carrier protein OS=Drosophila melanogaster GN=sesB PE=2 SV=4	tr|Q9NHW5|Q9NHW5_LUCCU	ADP/ATP translocase OS=Lucilia cuprina PE=2 SV=1	IPR002067:Mitochondrial carrier protein	GO:0055085	transmembrane transport	path:ko04020,path:ko04022,path:ko04217,path:ko04218,path:ko05012,path:ko05016,path:ko05166	Calcium signaling pathway|cGMP-PKG signaling pathway|Necroptosis|Cellular senescence|Parkinson's disease|Huntington's disease|HTLV-I infection
evm.model.Contig135.64	3586.4	3503.43	3198.9	1734.57	1947.31	1890.81	1180.69	1018.92	1018.82	696.4	510.831	598.395	751.16	633.534	706.365	RPL35	RL35_HUMAN	60S ribosomal protein L35 OS=Homo sapiens GN=RPL35 PE=1 SV=2	tr|A0A0L0CDI2|A0A0L0CDI2_LUCCU	Uncharacterized protein (Fragment) OS=Lucilia cuprina GN=FF38_02168 PE=3 SV=1	IPR000477:Reverse transcriptase domain	GO:0003735	structural constituent of ribosome	path:ko03010	Ribosome
evm.model.Contig6.889	10.3935	9.94556	13.9446	7.29126	10.5076	7.69003	27.5466	13.7559	21.4309	386.04	135.551	414.459	672.506	850.419	689.679				tr|A0A0L0CES0|A0A0L0CES0_LUCCU	Uncharacterized protein OS=Lucilia cuprina GN=FF38_01589 PE=4 SV=1	IPR031720:Protein of unknown function DUF4728
evm.model.Contig36.50	237.933	238.504	266.536	77.3303	115.246	99.9331	44.0825	113.041	75.4307	113.584	39.9465	119.738	861.797	815.616	679.576	ade5	PUR6_DROME	Multifunctional protein ADE2 OS=Drosophila melanogaster GN=ade5 PE=2 SV=2	tr|A0A0L0BSM2|A0A0L0BSM2_LUCCU	Multifunctional protein ADE2 OS=Lucilia cuprina GN=FF38_10461 PE=3 SV=1	IPR028923:SAICAR synthetase/ADE2, N-terminal	GO:0006189	'de novo' IMP biosynthetic process	path:ko00230	Purine metabolism
evm.model.Contig1.244	105.148	145.02	162.079	206.651	90.2867	82.8165	661.737	53.5213	426.226	967.193	285.356	605.261	545.814	452.697	671.253	Sirup	SDHF4_DROME	Succinate dehydrogenase assembly factor 4, mitochondrial OS=Drosophila melanogaster GN=Sirup PE=3 SV=2	tr|A0A0L0BZA5|A0A0L0BZA5_LUCCU	Uncharacterized protein OS=Lucilia cuprina GN=FF38_07604 PE=4 SV=1	IPR012875:Protein of unknown function DUF1674
evm.model.Contig182.12	7.33602	9.09244	12.9337	44.3891	49.107	20.1359	111.054	122.755	183.67	1163.18	465.774	1207.02	470.442	637.48	659.061				tr|A0A0L0BVM9|A0A0L0BVM9_LUCCU	Uncharacterized protein OS=Lucilia cuprina GN=FF38_06312 PE=4 SV=1	IPR029277:Single domain Von Willebrand factor type C domain
evm.model.Contig23.30	73.0745	77.9591	78.2236	66.0257	73.6661	80.2661	175.322	414.798	284.981	584.462	467.573	448.262	315.559	621.447	657.075	D11DS	ACO11_TRINI	Acyl-CoA Delta(11) desaturase OS=Trichoplusia ni GN=D11DS PE=1 SV=2	tr|A0A0L0CIK6|A0A0L0CIK6_LUCCU	Uncharacterized protein OS=Lucilia cuprina GN=FF38_06611 PE=4 SV=1	IPR005804:Fatty acid desaturase domain	GO:0006629	lipid metabolic process	path:ko01040,path:ko03320,path:ko04152,path:ko04212	Biosynthesis of unsaturated fatty acids|PPAR signaling pathway|AMPK signaling pathway|Longevity regulating pathway - worm
evm.model.Contig38.30	2253.76	2218.93	2242.11	1144.45	1329.94	1297.52	1083.63	1126.79	1036.1	557.387	448.159	516.423	641.318	568.499	634.682	RpL18A	RL18A_DROME	60S ribosomal protein L18a OS=Drosophila melanogaster GN=RpL18A PE=1 SV=1	tr|A0A1L8EHQ2|A0A1L8EHQ2_HAEIR	60S ribosomal protein L18a OS=Haematobia irritans PE=3 SV=1	IPR023573:Ribosomal protein 50S-L18Ae/60S-L20/60S-L18A	GO:0003735	structural constituent of ribosome	path:ko03010	Ribosome
evm.model.Contig94.5	0.640322	0	0.389908	0.434932	0	0.651217	1.07521	0.436284	1.0397	178.037	33.0619	279.946	617.385	451.284	627.106	nas-8	ATTA_GLOMM	Attacin-A OS=Glossina morsitans morsitans PE=1 SV=1	tr|A0A0L0C779|A0A0L0C779_LUCCU	Uncharacterized protein OS=Lucilia cuprina GN=FF38_04372 PE=4 SV=1	IPR005520:Attacin, N-terminal	GO:0005576	extracellular region
evm.model.Contig11.333	1830.4	1811.37	1964.3	775.402	833.816	782.864	726.252	777.488	709.269	632.85	501.471	544.177	645.8	599.733	620.629	eIF-4a	IF4A_DROME	Eukaryotic initiation factor 4A OS=Drosophila melanogaster GN=eIF-4a PE=1 SV=3	tr|A0A1I8NUT6|A0A1I8NUT6_STOCA	Uncharacterized protein OS=Stomoxys calcitrans GN=106094562 PE=3 SV=1	IPR011545:DEAD/DEAH box helicase domain	GO:0003676	nucleic acid binding	path:ko03013	RNA transport
evm.model.Contig16.306	2499.2	2384.71	2312.43	1505.28	1601.93	1604.77	1151.72	1113.05	1055.56	591.404	458.254	537.132	653.522	585.741	619.978	RpL18	RL18_DROME	60S ribosomal protein L18 OS=Drosophila melanogaster GN=RpL18 PE=1 SV=1	tr|A0A0L0CI57|A0A0L0CI57_LUCCU	Vesicle transport protein USE1 OS=Lucilia cuprina GN=FF38_00011 PE=4 SV=1	IPR021131:Ribosomal protein L18e/L15P	GO:0003735	structural constituent of ribosome	path:ko03010	Ribosome
evm.model.Contig102.30	66.931	50.8225	58.8891	67.6785	53.0964	49.6084	191.006	94.6263	111.646	1423.26	1017.19	1143.43	645.595	652.708	607.703	Gabarap	GBRAP_RAT	Gamma-aminobutyric acid receptor-associated protein OS=Rattus norvegicus GN=Gabarap PE=1 SV=1	tr|A0A0L0BZZ9|A0A0L0BZZ9_LUCCU	Uncharacterized protein OS=Lucilia cuprina GN=FF38_03383 PE=3 SV=1	IPR004241:Autophagy protein Atg8 ubiquitin-like			path:ko04068,path:ko04136,path:ko04137,path:ko04138,path:ko04139,path:ko04140,path:ko04212,path:ko04371,path:ko04621,path:ko04727,path:ko05167	FoxO signaling pathway|Autophagy - other|Mitophagy - animal|Autophagy - yeast|Mitophagy - yeast|Autophagy - animal|Longevity regulating pathway - worm|Apelin signaling pathway|NOD-like receptor signaling pathway|GABAergic synapse|Kaposi's sarcoma-associated herpesvirus infection
evm.model.Contig6.469	12.7062	12.8292	11.3262	37.7136	19.4375	47.3435	11.9075	7.31813	11.4634	791.702	243.7	799.403	670.6	667.621	602.003				tr|A0A0L0CN14|A0A0L0CN14_LUCCU	Superoxide dismutase [Cu-Zn] OS=Lucilia cuprina GN=FF38_01779 PE=3 SV=1	IPR001424:Superoxide dismutase, copper/zinc binding domain	GO:0006801	superoxide metabolic process	path:ko04146,path:ko04213,path:ko05014,path:ko05016,path:ko05020	Peroxisome|Longevity regulating pathway - multiple species|Amyotrophic lateral sclerosis (ALS)|Huntington's disease|Prion diseases
evm.model.Contig2.358	399.535	311.882	294.17	30.5332	55.2396	52.1865	768.4	676.853	1415.43	77.1099	134.515	292.655	676.38	692.362	598.273	ADH	ADH_BACOL	Alcohol dehydrogenase OS=Bactrocera oleae GN=ADH PE=2 SV=1	tr|Q26653|Q26653_SARPE	ADH OS=Sarcophaga peregrina PE=2 SV=1	IPR002426:Alcohol dehydrogenase, Ceratitis-type	GO:0004022	alcohol dehydrogenase (NAD activity)	path:ko05202	Transcriptional misregulation in cancer
evm.model.Contig70.63	0.192322	0.0527233	0.232333	0.0703202	0.768652	0.561031	0.38403	0.0628219	0	0.300624	0.361656	0.56378	331.507	574.446	591.178				tr|A0A0L0CM17|A0A0L0CM17_LUCCU	Uncharacterized protein OS=Lucilia cuprina GN=FF38_00502 PE=4 SV=1	IPR010629:Insect allergen-related
evm.model.Contig14.237	715.004	734.874	760.66	115.565	157.148	138.377	226.555	543.704	607.199	259.212	193.271	245.676	665.203	717.804	590.791	Hsc70-3	HSP7C_DROME	Heat shock 70 kDa protein cognate 3 OS=Drosophila melanogaster GN=Hsc70-3 PE=2 SV=2	tr|A0A0L0C201|A0A0L0C201_LUCCU	Heat shock 70 kDa protein cognate 3 OS=Lucilia cuprina GN=FF38_01793 PE=3 SV=1	IPR013126:Heat shock protein 70 family			path:ko03060,path:ko04141,path:ko04918,path:ko05020	Protein export|Protein processing in endoplasmic reticulum|Thyroid hormone synthesis|Prion diseases
evm.model.Contig136.6	0.314945	0	0.287763	0	0.207927	0.205561	0.304663	0	0	0.207085	0.306386	0.547396	361.934	476.223	588.806				tr|A0A0L0CME2|A0A0L0CME2_LUCCU	Uncharacterized protein (Fragment) OS=Lucilia cuprina GN=FF38_13220 PE=4 SV=1	IPR002350:Kazal domain	GO:0005515	protein binding
evm.model.Contig2.196	2323.97	1771.59	1799	2197.62	2170.12	2033.25	2744.45	2406.38	2518.93	1010.99	1899.35	786.422	646.998	634.718	581.361	Ndufa4	NDUA4_MOUSE	Cytochrome c oxidase subunit NDUFA4 OS=Mus musculus GN=Ndufa4 PE=1 SV=2	tr|A0A0L0C4U2|A0A0L0C4U2_LUCCU	Uncharacterized protein OS=Lucilia cuprina GN=FF38_01120 PE=4 SV=1	IPR010530:NADH-ubiquinone reductase complex 1 MLRQ subunit			path:ko00190,path:ko04714,path:ko04723,path:ko04932,path:ko05010,path:ko05012,path:ko05016	Oxidative phosphorylation|Thermogenesis|Retrograde endocannabinoid signaling|Non-alcoholic fatty liver disease (NAFLD)|Alzheimer's disease|Parkinson's disease|Huntington's disease
evm.model.Contig37.203	1167.88	1230.6	1107.24	1832.88	1789.65	1519.45	1604.81	1953.4	2470.19	1339.72	2287.08	990.809	892.215	867.982	572.553	Gapdh2	G3P2_DROME	Glyceraldehyde-3-phosphate dehydrogenase 2 OS=Drosophila melanogaster GN=Gapdh2 PE=1 SV=2	tr|A0A0L0CJ05|A0A0L0CJ05_LUCCU	Glyceraldehyde-3-phosphate dehydrogenase OS=Lucilia cuprina GN=FF38_07400 PE=3 SV=1	IPR020831:Glyceraldehyde/Erythrose phosphate dehydrogenase family	GO:0016620	oxidoreductase activity, acting on the aldehyde or oxo group of donors, NAD or NADP as acceptor	path:ko00010,path:ko00710,path:ko04066,path:ko05010	Glycolysis / Gluconeogenesis|Carbon fixation in photosynthetic organisms|HIF-1 signaling pathway|Alzheimer's disease
evm.model.Contig2.162	1146.66	1302.28	1189.82	271.453	328.849	451.604	311.551	519.948	671.855	501.067	376.292	370.86	634.049	711.6	568.894	Crc	CALR_DROME	Calreticulin OS=Drosophila melanogaster GN=Crc PE=1 SV=2	tr|A0A0L0CMX7|A0A0L0CMX7_LUCCU	Calreticulin OS=Lucilia cuprina GN=FF38_06666 PE=3 SV=1	IPR001580:Calreticulin/calnexin	GO:0005509	calcium ion binding	path:ko04141,path:ko04145,path:ko04612,path:ko05142,path:ko05166	Protein processing in endoplasmic reticulum|Phagosome|Antigen processing and presentation|Chagas disease (American trypanosomiasis)|HTLV-I infection
evm.model.Contig185.13	46.5013	84.467	78.0826	114.972	74.0447	65.7499	139.948	73.7522	115.502	482.807	281.868	446.259	567.202	560.746	557.765	Ubc	UBC_RAT	Polyubiquitin-C OS=Rattus norvegicus GN=Ubc PE=1 SV=1	tr|Q8VC46|Q8VC46_MOUSE	Ubc protein OS=Mus musculus GN=Ubc PE=2 SV=1	IPR000626:Ubiquitin domain	GO:0005515	protein binding	path:ko03320	PPAR signaling pathway
evm.model.Contig113.42	0.0799716	0	0	0	0.161904	0.489248	0.0772579	0	0	17.016	7.97166	41.7224	366.05	315.408	546.548	Fibcd1	FBCD1_MOUSE	Fibrinogen C domain-containing protein 1 OS=Mus musculus GN=Fibcd1 PE=2 SV=1	tr|A0A0L0C3K1|A0A0L0C3K1_LUCCU	Uncharacterized protein OS=Lucilia cuprina GN=FF38_06373 PE=4 SV=1	IPR002181:Fibrinogen, alpha/beta/gamma chain, C-terminal globular domain
evm.model.Contig6.519	2541.02	2433.27	2108.77	1336.59	1537.47	1636.15	1057.41	962.015	957.274	486.417	381.374	423.115	612.884	541.645	545.765	Rpl12	RL12_MOUSE	60S ribosomal protein L12 OS=Mus musculus GN=Rpl12 PE=1 SV=2	tr|A0A1A9WP77|A0A1A9WP77_9MUSC	Uncharacterized protein OS=Glossina brevipalpis PE=3 SV=1	IPR020784:Ribosomal protein L11, N-terminal	GO:0003735	structural constituent of ribosome
evm.model.Contig7.36	93.8252	309.414	254.228	146.547	56.6721	107.217	147.017	76.0615	118.26	922.915	444.509	1026.66	306.182	374.65	545.081	Eif4ebp2	4EBP2_MOUSE	Eukaryotic translation initiation factor 4E-binding protein 2 OS=Mus musculus GN=Eif4ebp2 PE=1 SV=1	tr|A0A0L0C8R7|A0A0L0C8R7_LUCCU	Uncharacterized protein OS=Lucilia cuprina GN=FF38_07967 PE=4 SV=1	IPR008606:Eukaryotic translation initiation factor 4E binding	GO:0008190	eukaryotic initiation factor 4E binding	path:ko03013,path:ko04213	RNA transport|Longevity regulating pathway - multiple species
evm.model.Contig28.57	181.216	189.019	201.341	66.9397	82.2565	58.1418	301.598	540.698	695.757	267.596	164.437	248.356	649.223	564.691	540.302	Pdi	PDI_DROME	Protein disulfide-isomerase OS=Drosophila melanogaster GN=Pdi PE=2 SV=1	tr|A0A0L0C696|A0A0L0C696_LUCCU	Protein disulfide-isomerase OS=Lucilia cuprina GN=FF38_10849 PE=3 SV=1	IPR013766:Thioredoxin domain	GO:0045454	cell redox homeostasis	path:ko04141	Protein processing in endoplasmic reticulum
evm.model.Contig16.302	67.7335	52.5489	57.4637	37.4357	41.6305	41.2164	29.6495	30.0775	28.7641	67.8783	39.4247	54.6149	550.448	488.275	538.824	CG13298	SF3B6_DROME	Splicing factor 3B subunit 6-like protein OS=Drosophila melanogaster GN=CG13298 PE=1 SV=1	tr|A0A0L0CIQ5|A0A0L0CIQ5_LUCCU	Pre-mRNA branch site p14-like protein OS=Lucilia cuprina GN=FF38_00014 PE=4 SV=1	IPR000504:RNA recognition motif domain	GO:0003676	nucleic acid binding	path:ko03040	Spliceosome
evm.model.Contig40.216	204.684	240.559	221.827	78.1966	112.467	89.0886	1491.43	1964.19	2458.64	1699.28	1467.31	1761.69	737.705	889.34	538.507				tr|A0A0L0BV55|A0A0L0BV55_LUCCU	Uncharacterized protein OS=Lucilia cuprina GN=FF38_01007 PE=4 SV=1
evm.model.Contig3.1057	366.4	337.449	311.198	237.624	283.446	346.324	182.64	222.372	226.317	470.687	273.153	412.532	587.138	655.185	537.923						IPR007834:DSS1/SEM1	GO:0006406	mRNA export from nucleus	path:ko03050,path:ko03440,path:ko05169	Proteasome|Homologous recombination|Epstein-Barr virus infection
evm.model.Contig9.208	23.0225	23.7311	25.5255	14.5841	18.852	15.3204	9.5023	14.4577	11.7665	19.1187	13.8872	14.6464	574.232	572.773	529.889	Mms19	MMS19_MOUSE	MMS19 nucleotide excision repair protein homolog OS=Mus musculus GN=Mms19 PE=1 SV=1	tr|A0A0L0CHY0|A0A0L0CHY0_LUCCU	Uncharacterized protein OS=Lucilia cuprina GN=FF38_12408 PE=4 SV=1	IPR024687:MMS19, C-terminal
evm.model.Contig5.283	85.9239	69.6999	91.4332	13.8896	24.4136	17.9275	149.992	196.044	183.57	175.575	65.4268	182.847	500.218	376.277	519.767	pug	C1TC_DROME	C-1-tetrahydrofolate synthase, cytoplasmic OS=Drosophila melanogaster GN=pug PE=1 SV=4	tr|A0A0L0BV52|A0A0L0BV52_LUCCU	C-1-tetrahydrofolate synthase, cytoplasmic OS=Lucilia cuprina GN=FF38_09104 PE=3 SV=1	IPR020631:Tetrahydrofolate dehydrogenase/cyclohydrolase, NAD(P)-binding domain	GO:0004488	methylenetetrahydrofolate dehydrogenase (NADP+ activity)	path:ko00670	One carbon pool by folate
evm.model.Contig6.557	136.499	123.971	112.975	592.573	496.741	806.246	98.1786	137.932	109.029	109.235	193.597	57.8211	516.731	427.517	514.402	PebIII	PEB3_DROME	Ejaculatory bulb-specific protein 3 OS=Drosophila melanogaster GN=PebIII PE=1 SV=2	tr|A0A068F7S6|A0A068F7S6_CALSG	Chemosensory protein OS=Calliphora stygia GN=CSP1 PE=2 SV=1	IPR005055:Insect odorant-binding protein A10/Ejaculatory bulb-specific protein 3
evm.model.Contig82.33	16.9035	19.7113	11.209	0	0	1.15043	0.784474	0.396111	0.378295	0	0	0	444.97	375.789	510.353				tr|A0A1A9VJE8|A0A1A9VJE8_GLOAU	Uncharacterized protein OS=Glossina austeni PE=4 SV=1
evm.model.Contig6.581	171.133	94.2976	153.835	33.5288	45.2893	45.2294	111.57	187.471	163.428	121.304	97.6008	151.196	376.44	382.545	505.144	CNDP2	CNDP2_HUMAN	Cytosolic non-specific dipeptidase OS=Homo sapiens GN=CNDP2 PE=1 SV=2	tr|A0A0L0CDT3|A0A0L0CDT3_LUCCU	Uncharacterized protein OS=Lucilia cuprina GN=FF38_08680 PE=4 SV=1	IPR017153:Cytosolic nonspecific dipeptidase/DUG1	GO:0016805	dipeptidase activity	path:ko00330,path:ko00340,path:ko00410	Arginine and proline metabolism|Histidine metabolism|beta-Alanine metabolism
evm.model.Contig8.406	3096.49	3041.26	3014.45	2884.24	3060.6	2681.39	3656.19	3741.8	3659.8	852.211	1366.09	658.867	564.893	528.913	504.922	gpatch4	AT5G_MANSE	ATP synthase lipid-binding protein, mitochondrial OS=Manduca sexta PE=2 SV=1	tr|A0A1L8EHV6|A0A1L8EHV6_HAEIR	Putative atp synthase lipid-binding protein mitochondrial OS=Haematobia irritans PE=3 SV=1	IPR002379:V-ATPase proteolipid subunit C-like domain	GO:0015078	hydrogen ion transmembrane transporter activity	path:ko00190,path:ko04714,path:ko05010,path:ko05012,path:ko05016	Oxidative phosphorylation|Thermogenesis|Alzheimer's disease|Parkinson's disease|Huntington's disease
evm.model.Contig2.350	303.372	302.035	247.085	805.441	686.834	470.644	822.22	563.557	716.123	2019.37	3502.51	1624.73	759.989	787.371	502.887	fau	FAU_DROME	Protein anoxia up-regulated OS=Drosophila melanogaster GN=fau PE=1 SV=3	tr|A0A0L0CS59|A0A0L0CS59_LUCCU	Protein anoxia up-regulated OS=Lucilia cuprina GN=FF38_09924 PE=4 SV=1
evm.model.Contig87.16	1439.49	1475.47	1450.21	1151.1	1181.44	1193.65	971.909	982.548	971.571	516.421	429.339	508.911	573.214	499.845	500.621	Ef1beta	EF1B_DROME	Probable elongation factor 1-beta OS=Drosophila melanogaster GN=Ef1beta PE=1 SV=3	tr|A0A034WQB6|A0A034WQB6_BACDO	Putative elongation factor 1-beta OS=Bactrocera dorsalis GN=EF1B PE=3 SV=1	IPR014038:Translation elongation factor EF1B, beta/delta subunit, guanine nucleotide exchange domain	GO:0003746	translation elongation factor activity
evm.model.Contig29.33	0.112661	1.10566	0.411772	3.3751	4.18056	0.565386	9.6536	3.5304	9.56488	25.4004	16.9036	24.1046	666.527	455.702	499.08	Hsp23	HSP23_DROME	Heat shock protein 23 OS=Drosophila melanogaster GN=Hsp23 PE=2 SV=2	tr|A0A0L0CQ23|A0A0L0CQ23_LUCCU	Heat shock protein 23 OS=Lucilia cuprina GN=FF38_06006 PE=3 SV=1	IPR001436:Alpha crystallin/Heat shock protein
evm.model.Contig84.51	0.072508	0	0.52725	0.076652	0.306351	0.15523	2.57684	13.9639	114.364	1035.82	459.864	324.079	92.3736	170.931	494.765	Sema-1a	ARY2_CALVI	Arylphorin subunit C223 OS=Calliphora vicina PE=2 SV=1	tr|O18320|O18320_CALVI	Arylphorin OS=Calliphora vicina PE=4 SV=1	IPR013788:Hemocyanin/hexamerin
evm.model.Contig70.64	0.084485	0.14128	0.0770747	0	0.182625	0.36419	0.252751	0	0	0.579156	0.480177	0.348165	456.202	534.638	494.337				tr|A0A0L0CM17|A0A0L0CM17_LUCCU	Uncharacterized protein OS=Lucilia cuprina GN=FF38_00502 PE=4 SV=1	IPR010629:Insect allergen-related
evm.model.Contig14.220	1022.12	751.231	659.914	165.843	264.134	339.754	379.657	817.167	968.836	206.299	182.345	194.629	535.993	498.847	493.877	SEC61G1	S61G1_DROME	Protein transport protein Sec61 gamma-1 subunit OS=Drosophila melanogaster GN=SEC61G1 PE=3 SV=1	tr|A0A1A9YJ89|A0A1A9YJ89_GLOFF	Uncharacterized protein OS=Glossina fuscipes fuscipes PE=3 SV=1	IPR001901:Protein translocase complex, SecE/Sec61-gamma subunit	GO:0006605	protein targeting	path:ko03060,path:ko04141,path:ko04145,path:ko05110	Protein export|Protein processing in endoplasmic reticulum|Phagosome|Vibrio cholerae infection
evm.model.Contig18.132	0	0	0.687086	0	0	0.696652	0.748739	0	0	0	0.749754	0.780468	345.726	958.318	477.16	Dll	VKT39_HAPSC	U15-theraphotoxin-Hs1a OS=Haplopelma schmidti PE=2 SV=1	tr|A0A0L0BRU8|A0A0L0BRU8_LUCCU	Uncharacterized protein OS=Lucilia cuprina GN=FF38_12133 PE=4 SV=1	IPR002223:Pancreatic trypsin inhibitor Kunitz domain	GO:0004867	serine-type endopeptidase inhibitor activity
evm.model.Contig23.158	2952.33	2288.24	2404.34	2156.92	2225.85	2062.79	2712.85	2502.8	2657.67	792.703	1372.09	609.682	581.328	522.456	476.106				tr|A0A0L0CE79|A0A0L0CE79_LUCCU	Uncharacterized protein (Fragment) OS=Lucilia cuprina GN=FF38_11694 PE=4 SV=1
evm.model.Contig18.126	0	0	0.59833	0	0	0.611658	0	0	0	0	0	0	306.314	278.943	470.96				tr|A0A0L0BRU8|A0A0L0BRU8_LUCCU	Uncharacterized protein OS=Lucilia cuprina GN=FF38_12133 PE=4 SV=1	IPR002223:Pancreatic trypsin inhibitor Kunitz domain	GO:0004867	serine-type endopeptidase inhibitor activity
evm.model.Contig152.48	3.43956	2.66142	2.0809	1.17907	1.94148	1.56775	7.3493	6.26996	5.22026	19.0032	14.5341	20.3677	864.254	507.753	467.147				tr|A0A0L0BXZ7|A0A0L0BXZ7_LUCCU	Uncharacterized protein OS=Lucilia cuprina GN=FF38_07857 PE=4 SV=1
evm.model.Contig47.143	1856.96	1862.75	2000.23	1908.84	1902.63	1628.47	2682.8	2993.28	2768.02	755.476	1062.45	617.062	480.422	463.805	458.193	ATPsyn-beta	ATPB_DROME	ATP synthase subunit beta, mitochondrial OS=Drosophila melanogaster GN=ATPsyn-beta PE=1 SV=3	tr|A0A0L0BSV2|A0A0L0BSV2_LUCCU	ATP synthase subunit beta OS=Lucilia cuprina GN=FF38_02476 PE=3 SV=1	IPR000194:ATPase, F1/V1/A1 complex, alpha/beta subunit, nucleotide-binding domain	GO:0015992	proton transport	path:ko00190,path:ko04714,path:ko05010,path:ko05012,path:ko05016	Oxidative phosphorylation|Thermogenesis|Alzheimer's disease|Parkinson's disease|Huntington's disease
evm.model.Contig37.70	181.574	163.09	167.525	444.242	440.815	374.692	745.151	748.784	783.293	950.249	386.934	1010.34	491.297	497.359	455.703	scu	HCD2_DROME	3-hydroxyacyl-CoA dehydrogenase type-2 OS=Drosophila melanogaster GN=scu PE=1 SV=1	tr|A0A1I8P3Q2|A0A1I8P3Q2_STOCA	Uncharacterized protein OS=Stomoxys calcitrans GN=106081076 PE=3 SV=1	IPR002347:Short-chain dehydrogenase/reductase SDR			path:ko00280,path:ko05010	Valine, leucine and isoleucine degradation|Alzheimer's disease
evm.model.Contig134.21	466.546	457.849	524.851	105.074	129.094	104.709	62.3682	82.4995	60.5855	95.8583	30.8032	74.748	385.514	349.734	455.636	Prps1	PRPS1_RAT	Ribose-phosphate pyrophosphokinase 1 OS=Rattus norvegicus GN=Prps1 PE=1 SV=2	tr|A0A1I8P487|A0A1I8P487_STOCA	Uncharacterized protein OS=Stomoxys calcitrans GN=106084958 PE=4 SV=1	IPR000836:Phosphoribosyltransferase domain	GO:0000287	magnesium ion binding	path:ko00030,path:ko00230	Pentose phosphate pathway|Purine metabolism
evm.model.Contig6.398	12.8791	9.05107	10.3755	17.3491	25.1545	6.9087	24.0595	28.5201	20.9829	53.0484	69.3992	36.5827	808.594	779.946	447.082				tr|A0A0L0C0W0|A0A0L0C0W0_LUCCU	Uncharacterized protein (Fragment) OS=Lucilia cuprina GN=FF38_07817 PE=4 SV=1
evm.model.Contig2.371	1.66413	0.921249	1.32083	0.516753	0.804895	0.520058	5.11211	3.40456	4.62214	169.653	29.2487	43.5807	167.928	492.829	444.36				tr|A0A1A9Y6M9|A0A1A9Y6M9_GLOFF	Uncharacterized protein OS=Glossina fuscipes fuscipes PE=4 SV=1
evm.model.Contig18.121	0	0	0.59392	0	0	1.43106	0.441376	0	0	1.366	0.444055	0.486021	159.659	1578.57	441.826	COL28A1	VKTD_ANEVI	U-actitoxin-Avd3p OS=Anemonia viridis PE=3 SV=1	tr|A0A0L0BRU8|A0A0L0BRU8_LUCCU	Uncharacterized protein OS=Lucilia cuprina GN=FF38_12133 PE=4 SV=1	IPR002223:Pancreatic trypsin inhibitor Kunitz domain	GO:0004867	serine-type endopeptidase inhibitor activity
evm.model.Contig34.206	1.20202	0	0.365536	0	1.07742	0.216258	0	0	0	36.5941	4.30696	7.74015	549.745	217.11	440.75	Fmnl1	LYS1_MUSDO	Lysozyme 1 OS=Musca domestica PE=1 SV=1	tr|A0A1I8MSX2|A0A1I8MSX2_MUSDO	Lysozyme OS=Musca domestica GN=101894169 PE=3 SV=1	IPR001916:Glycoside hydrolase, family 22	GO:0003796	lysozyme activity	path:ko04970	Salivary secretion
evm.model.Contig19.144	6.5474	9.15921	5.96107	12.9848	12.7699	13.6052	9.52079	8.58722	7.94976	73.1067	24.3479	62.9173	490.839	448.314	439.613	LRRC20	LRC20_HUMAN	Leucine-rich repeat-containing protein 20 OS=Homo sapiens GN=LRRC20 PE=1 SV=1	tr|A0A0L0BU29|A0A0L0BU29_LUCCU	Uncharacterized protein OS=Lucilia cuprina GN=FF38_09112 PE=4 SV=1	IPR001611:Leucine-rich repeat	GO:0005515	protein binding
evm.model.Contig2.626	28.6502	22.6918	26.8585	23.8584	20.827	18.6757	90.1102	77.8964	76.5391	664.016	237.543	663.916	462.778	509.908	431.121	PSAP	SAP_HUMAN	Prosaposin OS=Homo sapiens GN=PSAP PE=1 SV=2	tr|A0A0L0CR79|A0A0L0CR79_LUCCU	Uncharacterized protein OS=Lucilia cuprina GN=FF38_01901 PE=4 SV=1	IPR008373:Saposin	GO:0006629	lipid metabolic process	path:ko04142	Lysosome
evm.model.Contig7.417	955.261	766.593	698.158	1876.16	2006.38	1877.16	2095.13	1917.05	1962.46	685.952	1215.58	569.597	540.713	523.38	425.912	ACYP2	CX6C1_THUOB	Cytochrome c oxidase subunit 6C-1 OS=Thunnus obesus PE=1 SV=2	tr|A0A0L0CC19|A0A0L0CC19_LUCCU	Uncharacterized protein OS=Lucilia cuprina GN=FF38_00659 PE=4 SV=1	IPR004204:Cytochrome c oxidase subunit 6C	GO:0004129	cytochrome-c oxidase activity	path:ko00190,path:ko04260,path:ko04714,path:ko04932,path:ko05010,path:ko05012,path:ko05016	Oxidative phosphorylation|Cardiac muscle contraction|Thermogenesis|Non-alcoholic fatty liver disease (NAFLD)|Alzheimer's disease|Parkinson's disease|Huntington's disease
evm.model.Contig70.65	0.509023	0	0.093105	0	0.403177	0.203258	0	0	0	0.368288	0.276812	0.383112	304.369	497.495	424.678				tr|A0A0L0CM17|A0A0L0CM17_LUCCU	Uncharacterized protein OS=Lucilia cuprina GN=FF38_00502 PE=4 SV=1	IPR010629:Insect allergen-related
evm.model.Contig7.106	62.2873	50.3172	54.7332	75.4128	81.3048	63.1726	204.968	211.359	240.599	66.6446	36.5565	75.4874	102.539	106.504	423.023	GRHPR	GRHPR_HUMAN	Glyoxylate reductase/hydroxypyruvate reductase OS=Homo sapiens GN=GRHPR PE=1 SV=1	tr|T1PEY9|T1PEY9_MUSDO	D-isomer specific 2-hydroxyacid dehydrogenase OS=Musca domestica PE=2 SV=1	IPR006140:D-isomer specific 2-hydroxyacid dehydrogenase, NAD-binding domain	GO:0008152	metabolic process	path:ko00260,path:ko00620,path:ko00630	Glycine, serine and threonine metabolism|Pyruvate metabolism|Glyoxylate and dicarboxylate metabolism
evm.model.Contig84.41	1.37655	0.0283302	2.21439	1.46982	1.29894	1.09867	2.81295	61.3528	191.697	734.783	566.058	844.036	827.412	507.93	420.644	Sema-1a	ARY1_CALVI	Arylphorin subunit A4 OS=Calliphora vicina PE=2 SV=1	tr|O18321|O18321_CALVI	Arylphorin OS=Calliphora vicina PE=2 SV=1	IPR013788:Hemocyanin/hexamerin
evm.model.Contig5.332	417.354	419.91	454.542	316.602	355.908	299.638	264.226	315.076	302.343	415.89	287.093	366.807	430.613	394.058	418.537	14-3-3epsilon	1433E_DROME	14-3-3 protein epsilon OS=Drosophila melanogaster GN=14-3-3epsilon PE=1 SV=2	tr|A0A0L0BZI1|A0A0L0BZI1_LUCCU	14-3-3 protein epsilon OS=Lucilia cuprina GN=FF38_13567 PE=3 SV=1	IPR000308:14-3-3 protein	GO:0019904	protein domain specific binding	path:ko04011,path:ko04110,path:ko04114,path:ko04151,path:ko04390,path:ko04391,path:ko04722,path:ko05169,path:ko05203	MAPK signaling pathway - yeast|Cell cycle|Oocyte meiosis|PI3K-Akt signaling pathway|Hippo signaling pathway|Hippo signaling pathway - fly|Neurotrophin signaling pathway|Epstein-Barr virus infection|Viral carcinogenesis
evm.model.Contig8.297	146.553	111.436	108.112	127.023	138.869	131.071	146.824	112.938	141.635	459.911	306.374	406.971	424.093	420.973	418.078	TGas006m08.1	H4_XENTR	Histone H4 OS=Xenopus tropicalis GN=TGas006m08.1 PE=3 SV=1	tr|A0A0F8BYJ6|A0A0F8BYJ6_LARCR	Histone H4 OS=Larimichthys crocea GN=EH28_09091 PE=3 SV=1	IPR001951:Histone H4	GO:0000786	nucleosome	path:ko05034,path:ko05203,path:ko05322	Alcoholism|Viral carcinogenesis|Systemic lupus erythematosus
evm.model.Contig86.47	393.049	398.03	369.982	277.109	296.371	262.047	217.515	282.858	235.902	412.966	321.027	325.817	396.218	408.531	413.908	TGas113e22.1	H33_XENTR	Histone H3.3 OS=Xenopus tropicalis GN=TGas113e22.1 PE=1 SV=3	tr|A0A0K8TL97|A0A0K8TL97_TABBR	Histone H3 (Fragment) OS=Tabanus bromius PE=2 SV=1	IPR007125:Histone H2A/H2B/H3	GO:0003677	DNA binding	path:ko05034,path:ko05202,path:ko05322	Alcoholism|Transcriptional misregulation in cancer|Systemic lupus erythematosus
evm.model.Contig89.39	47.7141	31.6461	51.1483	15.1876	17.0998	13.4464	90.7357	128.651	145.791	637.663	409.015	814.579	450.306	461.451	412.18	Cat	CATA_DROME	Catalase OS=Drosophila melanogaster GN=Cat PE=1 SV=2	tr|A0A1L8EEC3|A0A1L8EEC3_HAEIR	Catalase OS=Haematobia irritans PE=3 SV=1	IPR010582:Catalase immune-responsive domain	GO:0004096	catalase activity	path:ko00380,path:ko00630,path:ko04011,path:ko04016,path:ko04068,path:ko04146,path:ko04211,path:ko04212,path:ko04213,path:ko05014	Tryptophan metabolism|Glyoxylate and dicarboxylate metabolism|MAPK signaling pathway - yeast|MAPK signaling pathway - plant|FoxO signaling pathway|Peroxisome|Longevity regulating pathway|Longevity regulating pathway - worm|Longevity regulating pathway - multiple species|Amyotrophic lateral sclerosis (ALS)
evm.model.Contig12.319	14.4743	15.0132	12.1291	46.5425	38.6912	43.4206	262.675	281.971	319.996	668.367	578.299	612.172	461.027	492.678	412.011	mai-2	ATIF2_CAEBR	ATPase inhibitor mai-2, mitochondrial OS=Caenorhabditis briggsae GN=mai-2 PE=3 SV=1	tr|B4NNB2|B4NNB2_DROWI	Uncharacterized protein OS=Drosophila willistoni GN=Dwil\GK22919 PE=4 SV=1	IPR007648:Mitochondrial ATPase inhibitor	GO:0005739	mitochondrion
evm.model.Contig25.93	0.391079	0.438625	1.0748	1.25983	0.934773	0.209442	28.1174	26.0827	8.67747	1566.43	566.891	1683.26	395.644	364.007	410.816
evm.model.Contig84.52	0.854184	0.030056	1.37079	1.54269	0.552775	0.893211	2.37912	33.4506	120.696	268.281	556.469	462.824	175.188	291.942	410.428	Sema-1a	ARY1_CALVI	Arylphorin subunit A4 OS=Calliphora vicina PE=2 SV=1	tr|O18321|O18321_CALVI	Arylphorin OS=Calliphora vicina PE=2 SV=1	IPR013788:Hemocyanin/hexamerin
evm.model.Contig20.28	51.5168	38.6098	37.178	59.9866	52.041	48.943	52.8959	46.8668	58.926	243.371	169.643	190.702	435.481	418.938	409.856	CD63	CD63_HUMAN	CD63 antigen OS=Homo sapiens GN=CD63 PE=1 SV=2	tr|A0A0L0CAH4|A0A0L0CAH4_LUCCU	Tetraspanin OS=Lucilia cuprina GN=FF38_02366 PE=3 SV=1	IPR000301:Tetraspanin	GO:0016021	integral component of membrane	path:ko04142,path:ko05205	Lysosome|Proteoglycans in cancer
evm.model.Contig189.3	15.2621	14.3048	13.7583	3.31428	4.90174	2.14932	14.0412	9.0197	12.9684	369.84	91.586	388.798	355.206	344.253	408.576	SDR-1	SDR1_AEDAE	Farnesol dehydrogenase OS=Aedes aegypti GN=SDR-1 PE=1 SV=2	tr|A0A0L0BRE1|A0A0L0BRE1_LUCCU	Uncharacterized protein OS=Lucilia cuprina GN=FF38_05325 PE=4 SV=1	IPR002347:Short-chain dehydrogenase/reductase SDR
evm.model.Contig61.182	127.956	97.6437	78.5866	21.2112	42.6558	35.212	179.876	126.595	177.354	633.503	350.974	601.173	463.855	729.519	408.194				tr|A0A0L0BST9|A0A0L0BST9_LUCCU	Uncharacterized protein OS=Lucilia cuprina GN=FF38_12167 PE=4 SV=1
evm.model.Contig1595.2	0.576913	0	0	0	0	0	1.15736	0	0	0	0	0	351.901	74.3441	406.803	app	A4_TAKRU	Amyloid beta A4 protein OS=Takifugu rubripes GN=app PE=3 SV=1	tr|A0A0L0BPN1|A0A0L0BPN1_LUCCU	Uncharacterized protein OS=Lucilia cuprina GN=FF38_12134 PE=4 SV=1	IPR002223:Pancreatic trypsin inhibitor Kunitz domain	GO:0004867	serine-type endopeptidase inhibitor activity
evm.model.Contig87.94	38.3213	20.9944	31.9033	1.8076	1.28377	1.0414	41.9454	82.4969	182.135	155.633	387.005	335.285	227.431	272.755	405.509	Cyp6g2	CP6G2_DROME	Probable cytochrome P450 6g2 OS=Drosophila melanogaster GN=Cyp6g2 PE=2 SV=1	tr|A0A0L0C9H1|A0A0L0C9H1_LUCCU	Putative cytochrome P450 6g2 OS=Lucilia cuprina GN=FF38_07373 PE=4 SV=1
evm.model.Contig346.1	0.0685815	0	0.251107	0.209065	0.136883	0.275883	0	0	0	2.73202	0.595119	1.77097	79.4139	145.022	403.825				tr|A0A0L0BL72|A0A0L0BL72_LUCCU	Uncharacterized protein OS=Lucilia cuprina GN=FF38_07715 PE=4 SV=1
evm.model.Contig65.138	1.27425	0.618789	1.11155	1.11142	0.75207	1.45221	2.2076	4.74721	2.38093	1027.88	362.731	946.823	323.056	368.267	399.303	CG4500	BGML_DROME	Long-chain-fatty-acid--CoA ligase bubblegum-like OS=Drosophila melanogaster GN=CG4500 PE=2 SV=1	tr|A0A1I8PCX0|A0A1I8PCX0_STOCA	Uncharacterized protein OS=Stomoxys calcitrans GN=106080443 PE=4 SV=1	IPR000873:AMP-dependent synthetase/ligase	GO:0003824	catalytic activity	path:ko00061,path:ko00071,path:ko03320,path:ko04920	Fatty acid biosynthesis|Fatty acid degradation|PPAR signaling pathway|Adipocytokine signaling pathway
evm.model.Contig40.135	421.306	383.089	383.514	459.268	511.912	430.572	1039.59	1169.29	1186.8	691.489	706.035	574.406	351.96	418.451	395.845	mdh1	MDHC_XENTR	Malate dehydrogenase, cytoplasmic OS=Xenopus tropicalis GN=mdh1 PE=2 SV=1	tr|A0A0L0CHM9|A0A0L0CHM9_LUCCU	Malate dehydrogenase OS=Lucilia cuprina GN=FF38_10245 PE=3 SV=1	IPR001236:Lactate/malate dehydrogenase, N-terminal	GO:0016616	oxidoreductase activity, acting on the CH-OH group of donors, NAD or NADP as acceptor	path:ko00020,path:ko00270,path:ko00620,path:ko00630,path:ko00710,path:ko04964	Citrate cycle (TCA cycle)|Cysteine and methionine metabolism|Pyruvate metabolism|Glyoxylate and dicarboxylate metabolism|Carbon fixation in photosynthetic organisms|Proximal tubule bicarbonate reclamation
evm.model.Contig93.109	33.8066	35.9355	31.1964	77.2822	77.5667	64.124	120.303	110.009	111.88	539.996	427.401	340.299	404.952	347.625	394.147				tr|A0A0L0CJE4|A0A0L0CJE4_LUCCU	Uncharacterized protein OS=Lucilia cuprina GN=FF38_12747 PE=4 SV=1	IPR004911:Gamma interferon inducible lysosomal thiol reductase GILT
evm.model.Contig14.173	123.136	97.236	96.0531	133.487	136.924	111.038	139.01	131.929	151.534	395.219	290.626	372.062	424.921	426.264	390.026	skp1	SKP1_XENLA	S-phase kinase-associated protein 1 OS=Xenopus laevis GN=skp1 PE=1 SV=3	tr|A0A1I8Q939|A0A1I8Q939_STOCA	Uncharacterized protein OS=Stomoxys calcitrans GN=106085712 PE=3 SV=1	IPR001232:S-phase kinase-associated protein 1-like	GO:0006511	ubiquitin-dependent protein catabolic process	path:ko04110,path:ko04111,path:ko04114,path:ko04120,path:ko04141,path:ko04310,path:ko04341,path:ko04350,path:ko04710,path:ko05168,path:ko05200	Cell cycle|Cell cycle - yeast|Oocyte meiosis|Ubiquitin mediated proteolysis|Protein processing in endoplasmic reticulum|Wnt signaling pathway|Hedgehog signaling pathway - fly|TGF-beta signaling pathway|Circadian rhythm|Herpes simplex infection|Pathways in cancer
evm.model.Contig51.51	207.276	234.672	238.053	9.08794	36.4935	29.9816	40.3316	118.25	97.916	21.2314	34.2801	24.4879	313.036	654.467	379.587	spr	SPRE_XENLA	Sepiapterin reductase OS=Xenopus laevis GN=spr PE=2 SV=1	tr|A0A0L0C2B0|A0A0L0C2B0_LUCCU	Uncharacterized protein OS=Lucilia cuprina GN=FF38_08590 PE=4 SV=1	IPR002347:Short-chain dehydrogenase/reductase SDR			path:ko00790	Folate biosynthesis
evm.model.Contig524.1	0	0	0	0	0.411601	0	0	0	0	0	0	0	230.537	8.23713	375.535				tr|A0A0L0BRZ1|A0A0L0BRZ1_LUCCU	Uncharacterized protein OS=Lucilia cuprina GN=FF38_12145 PE=4 SV=1	IPR002223:Pancreatic trypsin inhibitor Kunitz domain	GO:0004867	serine-type endopeptidase inhibitor activity
evm.model.Contig6.769	205.344	175.425	182.339	147.891	132.021	126.44	200.11	190.076	208.245	417.729	267.94	403.497	364.33	361.874	371.872	Rho1	RHO1_DROME	Ras-like GTP-binding protein Rho1 OS=Drosophila melanogaster GN=Rho1 PE=1 SV=1	tr|A0A1L8EB77|A0A1L8EB77_HAEIR	Putative rho (Fragment) OS=Haematobia irritans PE=4 SV=1	IPR003578:Small GTPase superfamily, Rho type	GO:0003924	GTPase activity	path:ko04011,path:ko04014,path:ko04015,path:ko04022,path:ko04024,path:ko04062,path:ko04071,path:ko04072,path:ko04144,path:ko04150,path:ko04270,path:ko04310,path:ko04350,path:ko04360,path:ko04510,path:ko04520,path:ko04530,path:ko04611,path:ko04621,path:ko04625,path:ko04660,path:ko04670,path:ko04722,path:ko04810,path:ko04921,path:ko04972,path:ko05100,path:ko05130,path:ko05133,path:ko05152,path:ko05…	MAPK signaling pathway - yeast|Ras signaling pathway|Rap1 signaling pathway|cGMP-PKG signaling pathway|cAMP signaling pathway|Chemokine signaling pathway|Sphingolipid signaling pathway|Phospholipase D signaling pathway|Endocytosis|mTOR signaling pathway|Vascular smooth muscle contraction|Wnt signaling pathway|TGF-beta signaling pathway|Axon guidance|Focal adhesion|Adherens junction|Tight junction…
evm.model.Contig76.18	45.7226	43.0991	26.4443	63.2727	48.3243	87.0092	18.5087	35.5338	25.4059	139.553	143.067	115.819	293.134	163.594	371.806	Eip71CD	MSRA_DROME	Peptide methionine sulfoxide reductase OS=Drosophila melanogaster GN=Eip71CD PE=2 SV=2	tr|A0A0L0C8I9|A0A0L0C8I9_LUCCU	Peptide methionine sulfoxide reductase OS=Lucilia cuprina GN=FF38_05729 PE=3 SV=1	IPR002569:Peptide methionine sulphoxide reductase MsrA	GO:0008113	peptide-methionine (S-S-oxide reductase activity)
evm.model.Contig89.62	670.082	593.12	566.43	252.083	400.999	329.957	234.261	217.172	276.869	1.54109	42.5096	8.03777	153.583	183.961	370.776	Hpd	HPPD_RAT	4-hydroxyphenylpyruvate dioxygenase OS=Rattus norvegicus GN=Hpd PE=1 SV=3	tr|A0A0L0BKZ9|A0A0L0BKZ9_LUCCU	4-hydroxyphenylpyruvate dioxygenase OS=Lucilia cuprina GN=FF38_06920 PE=3 SV=1	IPR005956:4-hydroxyphenylpyruvate dioxygenase	GO:0003868	4-hydroxyphenylpyruvate dioxygenase activity	path:ko00130,path:ko00350,path:ko00360	Ubiquinone and other terpenoid-quinone biosynthesis|Tyrosine metabolism|Phenylalanine metabolism
evm.model.Contig4.444	12.6544	10.6817	10.7558	5.58447	7.06376	6.01595	71.0257	81.9808	76.9414	116.655	64.9977	89.24	306.572	275.831	368.338	Pepck	PCKG_DROME	Phosphoenolpyruvate carboxykinase [GTP] OS=Drosophila melanogaster GN=Pepck PE=2 SV=2	tr|A0A0L0BSP4|A0A0L0BSP4_LUCCU	Phosphoenolpyruvate carboxykinase [GTP] OS=Lucilia cuprina GN=FF38_06399 PE=3 SV=1	IPR035077:Phosphoenolpyruvate carboxykinase, GTP-utilising, C-terminal	GO:0004611	phosphoenolpyruvate carboxykinase activity	path:ko00010,path:ko00020,path:ko00620,path:ko03320,path:ko04068,path:ko04151,path:ko04152,path:ko04910,path:ko04920,path:ko04922,path:ko04931,path:ko04964	Glycolysis / Gluconeogenesis|Citrate cycle (TCA cycle)|Pyruvate metabolism|PPAR signaling pathway|FoxO signaling pathway|PI3K-Akt signaling pathway|AMPK signaling pathway|Insulin signaling pathway|Adipocytokine signaling pathway|Glucagon signaling pathway|Insulin resistance|Proximal tubule bicarbonate reclamation
evm.model.Contig12.58	1714.77	1694.42	1880.28	1680.69	1644.45	1387.05	2424.3	2706.87	2456.19	694.554	1010.49	558.831	403.233	378.33	367.175	blw	ATPA_DROME	ATP synthase subunit alpha, mitochondrial OS=Drosophila melanogaster GN=blw PE=1 SV=2	tr|A0A1L8EHL5|A0A1L8EHL5_HAEIR	ATP synthase subunit alpha OS=Haematobia irritans PE=3 SV=1	IPR000194:ATPase, F1/V1/A1 complex, alpha/beta subunit, nucleotide-binding domain	GO:0015986	ATP synthesis coupled proton transport	path:ko00190,path:ko04714,path:ko05010,path:ko05012,path:ko05016	Oxidative phosphorylation|Thermogenesis|Alzheimer's disease|Parkinson's disease|Huntington's disease
evm.model.Contig7.553	156.579	87.7181	131.67	5.70557	13.6466	12.2291	164.751	250.15	318.699	559.233	214.257	488.805	384.12	370.844	367.049	CLVS1	CLVS1_PONAB	Clavesin-1 OS=Pongo abelii GN=CLVS1 PE=2 SV=1	tr|A0A0L0BX28|A0A0L0BX28_LUCCU	Uncharacterized protein OS=Lucilia cuprina GN=FF38_09647 PE=4 SV=1	IPR001251:CRAL-TRIO lipid binding domain	GO:0005215	transporter activity
evm.model.Contig11.392	512.729	451.753	512.623	149.91	195.605	241.551	391.728	957.732	1081.96	171.87	132.293	139.529	374.311	327.377	366.629	Sec61a2	S61A2_MOUSE	Protein transport protein Sec61 subunit alpha isoform 2 OS=Mus musculus GN=Sec61a2 PE=2 SV=3	tr|A0A1L8EHE1|A0A1L8EHE1_HAEIR	Putative transport protein sec61 alpha subunit OS=Haematobia irritans PE=3 SV=1	IPR002208:SecY/SEC61-alpha family	GO:0015031	protein transport	path:ko03060,path:ko04141,path:ko04145,path:ko05110	Protein export|Protein processing in endoplasmic reticulum|Phagosome|Vibrio cholerae infection
evm.model.Contig27.29	344.302	277.13	323.864	151.382	162.166	138.948	394.322	639.141	572.952	341.434	232.963	293.222	361.459	338.231	364.583	Idh1	IDHC_RAT	Isocitrate dehydrogenase [NADP] cytoplasmic OS=Rattus norvegicus GN=Idh1 PE=1 SV=1	tr|A0A0L0CQS9|A0A0L0CQS9_LUCCU	Uncharacterized protein (Fragment) OS=Lucilia cuprina GN=FF38_09151 PE=4 SV=1	IPR024084:Isopropylmalate dehydrogenase-like domain	GO:0016616	oxidoreductase activity, acting on the CH-OH group of donors, NAD or NADP as acceptor	path:ko00020,path:ko00480,path:ko00720,path:ko04146	Citrate cycle (TCA cycle)|Glutathione metabolism|Carbon fixation pathways in prokaryotes|Peroxisome
evm.model.Contig87.97	39.233	16.3526	29.7456	3.61768	3.26346	10.5523	42.6509	47.8136	141.069	151.301	313.66	282.502	223.292	252.762	364.093	Cyp6g2	CP6G2_DROME	Probable cytochrome P450 6g2 OS=Drosophila melanogaster GN=Cyp6g2 PE=2 SV=1	tr|A0A068F645|A0A068F645_CALSG	Cytochrome P450 OS=Calliphora stygia GN=Cyp53 PE=2 SV=1	IPR001128:Cytochrome P450	GO:0005506	iron ion binding
evm.model.Contig10.332	23.0544	19.8861	14.1302	18.4149	21.5377	11.9316	32.9131	20.4739	33.3676	26.8415	20.4835	31.6526	383.505	257.566	360.911	PGRP-SA	PGPSA_DROME	Peptidoglycan-recognition protein SA OS=Drosophila melanogaster GN=PGRP-SA PE=1 SV=1	tr|A0A0L0CNU3|A0A0L0CNU3_LUCCU	Peptidoglycan-recognition protein OS=Lucilia cuprina GN=FF38_10195 PE=3 SV=1	IPR006619:Peptidoglycan recognition protein family domain, metazoa/bacteria	GO:0008745	N-acetylmuramoyl-L-alanine amidase activity
evm.model.Contig12.135	237.11	219.598	228.91	97.3513	116.925	109.455	129.859	188.545	213.919	215.096	140.031	179.009	391.923	417.537	358.983	PDIA3	PDIA3_CHICK	Protein disulfide-isomerase A3 OS=Gallus gallus GN=PDIA3 PE=2 SV=1	tr|T1PHC1|T1PHC1_MUSDO	Protein disulfide-isomerase OS=Musca domestica PE=2 SV=1	IPR034014:Pol III subunit C11, C-terminal zinc ribbon	GO:0045454	cell redox homeostasis	path:ko04141,path:ko04612	Protein processing in endoplasmic reticulum|Antigen processing and presentation
evm.model.Contig37.117	146.963	111.42	106.725	294.829	317.911	239.17	397.938	412.558	433.882	446.307	349.314	357.077	492.975	499.271	358.823	DBI	ACBP_CHAVI	Acyl-CoA-binding protein OS=Chaetophractus villosus GN=DBI PE=1 SV=2	tr|A0A0L0C0K1|A0A0L0C0K1_LUCCU	Uncharacterized protein OS=Lucilia cuprina GN=FF38_08134 PE=4 SV=1	IPR000582:Acyl-CoA-binding protein, ACBP	GO:0000062	fatty-acyl-CoA binding
evm.model.Contig15.181	695.007	608.864	675.317	311.733	377.903	338.815	171.625	282.652	235.709	205.562	165.463	165.085	355.5	335.07	357.471	kra	PKRA_DROME	Protein krasavietz OS=Drosophila melanogaster GN=kra PE=1 SV=1	tr|A0A0L0BPL3|A0A0L0BPL3_LUCCU	Protein extra bases OS=Lucilia cuprina GN=FF38_14223 PE=4 SV=1	IPR003307:W2 domain	GO:0005515	protein binding
evm.model.Contig18.40	42.5572	50.7325	43.465	194.643	161.863	141.654	49.453	11.5113	29.9695	158.175	150.398	54.8135	243.522	307.226	355.203	Obp99a	OB99A_DROME	General odorant-binding protein 99a OS=Drosophila melanogaster GN=Obp99a PE=1 SV=2	tr|A0A0L0BPB2|A0A0L0BPB2_LUCCU	General odorant-binding protein 99a OS=Lucilia cuprina GN=FF38_12092 PE=4 SV=1	IPR006170:Pheromone/general odorant binding protein	GO:0005549	odorant binding
evm.model.Contig70.66	0.0815096	0	0.0741061	0	0.515328	0.172064	0.406413	0	0	0.164032	0.499696	0.42738	312.051	481.557	354.333				tr|A0A0L0CM17|A0A0L0CM17_LUCCU	Uncharacterized protein OS=Lucilia cuprina GN=FF38_00502 PE=4 SV=1	IPR010629:Insect allergen-related
evm.model.Contig8.471	7.51092	6.70621	7.16554	5.69404	9.04905	6.35955	113.357	89.9079	120.266	510.9	331.885	360.068	342.836	486.922	354.259	Lsd-1	LSD1_DROME	Lipid storage droplets surface-binding protein 1 OS=Drosophila melanogaster GN=Lsd-1 PE=2 SV=2	tr|A0A0L0BUW8|A0A0L0BUW8_LUCCU	Lipid storage droplets surface-binding protein 1 OS=Lucilia cuprina GN=FF38_01303 PE=3 SV=1	IPR004279:Perilipin
evm.model.Contig162.14	2950.21	2703.96	2848.15	1185.97	1347.76	1159.54	877.004	891.732	790.75	423.635	333.054	321.142	396.918	347.697	354.21	btf3l4	BT3L4_DANRE	Transcription factor BTF3 homolog 4 OS=Danio rerio GN=btf3l4 PE=2 SV=1	tr|A0A0L0CBB3|A0A0L0CBB3_LUCCU	Transcription factor BTF3 OS=Lucilia cuprina GN=FF38_11552 PE=3 SV=1	IPR002715:Nascent polypeptide-associated complex NAC domain			path:ko04214	Apoptosis - fly
evm.model.Contig70.111	15.8618	16.9755	17.9768	18.1115	16.217	9.9338	9.42409	7.01337	8.39339	36.3596	39.5762	23.8726	325.955	324.145	353.934	STMN3	STMN3_PONAB	Stathmin-3 OS=Pongo abelii GN=STMN3 PE=2 SV=1	tr|A0A0L0BW58|A0A0L0BW58_LUCCU	Uncharacterized protein OS=Lucilia cuprina GN=FF38_13694 PE=4 SV=1	IPR000956:Stathmin family	GO:0031110	regulation of microtubule polymerization or depolymerization
evm.model.Contig36.71	292.066	257.328	248.906	211.788	313.567	899.602	660.737	1136.93	877.09	29.7131	149.355	48.4941	61.2648	81.0684	349.787				tr|A0A0L0BSS6|A0A0L0BSS6_LUCCU	Uncharacterized protein OS=Lucilia cuprina GN=FF38_10455 PE=4 SV=1	IPR002557:Chitin binding domain	GO:0005576	extracellular region
evm.model.Contig6.486	113.436	103.209	114.281	72.6155	82.8553	78.7284	94.479	132.607	127.596	230.573	151.84	227.161	396.939	428.543	349.679	TER94	TERA_DROME	Transitional endoplasmic reticulum ATPase TER94 OS=Drosophila melanogaster GN=TER94 PE=1 SV=1	tr|A0A1A9YE81|A0A1A9YE81_GLOFF	Uncharacterized protein OS=Glossina fuscipes fuscipes PE=3 SV=1	IPR003959:ATPase, AAA-type, core	GO:0005524	ATP binding	path:ko04141,path:ko05134	Protein processing in endoplasmic reticulum|Legionellosis
evm.model.Contig20.18	89.3332	71.6284	76.1117	127.206	107.949	87.7089	153.108	110.191	111.277	1060.88	589.06	1061.44	364.868	384.504	347.898	lbm	LBM_DROME	Protein late bloomer OS=Drosophila melanogaster GN=lbm PE=2 SV=1	tr|W8ARL9|W8ARL9_CERCA	Protein late bloomer OS=Ceratitis capitata GN=LBM PE=2 SV=1	IPR018499:Tetraspanin/Peripherin	GO:0016021	integral component of membrane
evm.model.Contig139.48	379.123	343.41	375.788	513.593	528.6	1206.32	841.065	1329.42	1011.66	304.361	386.408	327.881	297.296	298.966	347.696				tr|Q06RG8|Q06RG8_LUCCU	Helmsman OS=Lucilia cuprina GN=hlm PE=2 SV=1	IPR002557:Chitin binding domain	GO:0005515	protein binding
evm.model.Contig13.196	68.8485	61.4351	66.7646	81.2114	82.3413	71.7715	142.621	132.021	141.232	392.877	237.007	433.422	316.132	367.995	342.86	GPXle-1	GPX4_SOLLC	Probable phospholipid hydroperoxide glutathione peroxidase OS=Solanum lycopersicum GN=GPXle-1 PE=2 SV=1	tr|A0A0L0CK64|A0A0L0CK64_LUCCU	Glutathione peroxidase (Fragment) OS=Lucilia cuprina GN=FF38_06091 PE=3 SV=1	IPR000889:Glutathione peroxidase	GO:0004602	glutathione peroxidase activity	path:ko00480,path:ko00590,path:ko04918	Glutathione metabolism|Arachidonic acid metabolism|Thyroid hormone synthesis
evm.model.Contig87.96	27.5655	13.4586	21.6539	2.88882	1.23365	2.90224	37.326	51.409	119.114	139.58	326.726	229.186	168.768	233.671	342.026	Cyp6g1	CP6G1_DROME	Cytochrome P450 6g1 OS=Drosophila melanogaster GN=Cyp6g1 PE=2 SV=1	tr|A0A068F645|A0A068F645_CALSG	Cytochrome P450 OS=Calliphora stygia GN=Cyp53 PE=2 SV=1	IPR001128:Cytochrome P450	GO:0005506	iron ion binding
evm.model.Contig11.347	502.009	377.272	401.735	420.974	442.557	409.396	493.443	553.86	524.184	392.517	308.923	347.624	314.9	303.148	341.955	Trx-2	THIO2_DROYA	Thioredoxin-2 OS=Drosophila yakuba GN=Trx-2 PE=3 SV=1	tr|A0A0L0BL29|A0A0L0BL29_LUCCU	Thioredoxin OS=Lucilia cuprina GN=FF38_07918 PE=3 SV=1	IPR005746:Thioredoxin	GO:0045454	cell redox homeostasis	path:ko04621,path:ko05418	NOD-like receptor signaling pathway|Fluid shear stress and atherosclerosis
evm.model.Contig63.113	1394.52	1415.53	1312.86	819.93	964.899	951.511	598.238	568.373	554.04	282.22	225.392	260.48	361.29	321.535	340.107	RpL32	RL32_DROYA	60S ribosomal protein L32 OS=Drosophila yakuba GN=RpL32 PE=2 SV=1	tr|A0A0L0CHS2|A0A0L0CHS2_LUCCU	Uncharacterized protein OS=Lucilia cuprina GN=FF38_12428 PE=3 SV=1	IPR018108:Mitochondrial substrate/solute carrier	GO:0003735	structural constituent of ribosome
evm.model.Contig28.5	1975.74	1551.69	1454.18	2112.35	2305.9	2132.06	2472.46	2494.16	2411.52	608.282	1405.38	477.104	438.286	443.297	339.655				tr|A0A0L0CK70|A0A0L0CK70_LUCCU	Uncharacterized protein OS=Lucilia cuprina GN=FF38_13189 PE=4 SV=1	IPR003205:Cytochrome c oxidase, subunit 8	GO:0004129	cytochrome-c oxidase activity	path:ko00190,path:ko04260,path:ko04714,path:ko04932,path:ko05010,path:ko05012,path:ko05016	Oxidative phosphorylation|Cardiac muscle contraction|Thermogenesis|Non-alcoholic fatty liver disease (NAFLD)|Alzheimer's disease|Parkinson's disease|Huntington's disease
evm.model.Contig84.40	0.901213	0	0.905087	0.923221	0.36935	1.03187	2.05264	13.4263	77.271	962.321	438.102	824.968	391.81	428.024	338.797	Sema-1a	ARY2_CALVI	Arylphorin subunit C223 OS=Calliphora vicina PE=2 SV=1	tr|O18320|O18320_CALVI	Arylphorin OS=Calliphora vicina PE=4 SV=1	IPR013788:Hemocyanin/hexamerin
evm.model.Contig106.72	950.298	913.657	1034.19	555.239	553.011	455.139	610.193	664.375	625.991	527.487	461.567	429.565	398.776	382.9	337.946	14-3-3zeta	1433Z_DROME	14-3-3 protein zeta OS=Drosophila melanogaster GN=14-3-3zeta PE=1 SV=1	tr|A0A1L8EHW5|A0A1L8EHW5_HAEIR	Putative multifunctional chaperone OS=Haematobia irritans PE=3 SV=1	IPR000308:14-3-3 protein	GO:0019904	protein domain specific binding	path:ko04013,path:ko04110,path:ko04114,path:ko04151,path:ko04212,path:ko04390,path:ko04391,path:ko05161,path:ko05169,path:ko05203	MAPK signaling pathway - fly|Cell cycle|Oocyte meiosis|PI3K-Akt signaling pathway|Longevity regulating pathway - worm|Hippo signaling pathway|Hippo signaling pathway - fly|Hepatitis B|Epstein-Barr virus infection|Viral carcinogenesis
evm.model.Contig36.186	87.7437	78.1043	80.9551	92.5487	101.793	112.799	81.569	98.9072	96.4744	266.352	157.068	235.61	357.916	423.619	336.248	Rpt6	PRS8_DROME	26S protease regulatory subunit 8 OS=Drosophila melanogaster GN=Rpt6 PE=1 SV=2	tr|A0A0L0C3P0|A0A0L0C3P0_LUCCU	26S protease regulatory subunit 8 OS=Lucilia cuprina GN=FF38_10936 PE=3 SV=1	IPR003959:ATPase, AAA-type, core	GO:0005524	ATP binding	path:ko03050,path:ko05169	Proteasome|Epstein-Barr virus infection
evm.model.Contig417.8	80.6171	79.2201	67.0091	67.4593	71.2377	68.8507	70.6341	67.409	77.8193	278.59	121.913	256.681	334.801	315.38	335.423	sqh	SQH_DROME	Myosin regulatory light chain sqh OS=Drosophila melanogaster GN=sqh PE=1 SV=1	tr|T1PBI8|T1PBI8_MUSDO	EF-hand domain protein OS=Musca domestica GN=101897157 PE=2 SV=1	IPR002048:EF-hand domain	GO:0005509	calcium ion binding	path:ko04510,path:ko04530,path:ko04611,path:ko04670,path:ko04810	Focal adhesion|Tight junction|Platelet activation|Leukocyte transendothelial migration|Regulation of actin cytoskeleton
evm.model.Contig121.80	1.58084	0.245874	0.287203	0.594511	0.295678	1.197	2.6803	0.301413	0	133.012	21.8552	80.9876	269.546	195.686	333.382				tr|A0A0L0BRP9|A0A0L0BRP9_LUCCU	Uncharacterized protein OS=Lucilia cuprina GN=FF38_04126 PE=4 SV=1
evm.model.Contig46.31	1027.62	1043.83	1007.4	821.134	1081.83	975.167	587.523	602.306	570.905	317.211	255.747	245.889	436.069	325.22	332.783	RpS2	RS2_DROME	40S ribosomal protein S2 OS=Drosophila melanogaster GN=RpS2 PE=1 SV=2	tr|A0A1L8EHZ8|A0A1L8EHZ8_HAEIR	Putative 40s ribosomal protein s2 OS=Haematobia irritans PE=3 SV=1	IPR005324:Ribosomal protein S5, C-terminal	GO:0003723	RNA binding	path:ko03010	Ribosome
evm.model.Contig40.127	223.059	171.12	177.579	275.428	254.692	205.901	905.382	560.354	777.344	642.671	259.349	479.437	272.731	238.958	329.785	ACAA2	THIM_HUMAN	3-ketoacyl-CoA thiolase, mitochondrial OS=Homo sapiens GN=ACAA2 PE=1 SV=2	tr|A0A0L0CH53|A0A0L0CH53_LUCCU	Uncharacterized protein OS=Lucilia cuprina GN=FF38_10243 PE=3 SV=1	IPR020617:Thiolase, C-terminal	GO:0008152	metabolic process	path:ko00062,path:ko00071,path:ko00280	Fatty acid elongation|Fatty acid degradation|Valine, leucine and isoleucine degradation
evm.model.Contig46.32	1543.93	1531.41	1592.22	1035.39	1138.84	1144.92	724.714	793.058	668.683	324.004	209.534	249.64	359.516	308.026	326.524	RpS2	RS2_DROME	40S ribosomal protein S2 OS=Drosophila melanogaster GN=RpS2 PE=1 SV=2	tr|A0A1L8EHZ8|A0A1L8EHZ8_HAEIR	Putative 40s ribosomal protein s2 OS=Haematobia irritans PE=3 SV=1	IPR005324:Ribosomal protein S5, C-terminal	GO:0003735	structural constituent of ribosome	path:ko03010	Ribosome
evm.model.Contig5.335	402.07	344.715	359.311	318.363	340.092	284.812	510.374	632.908	605.931	368.542	591.001	299.989	308.427	269.456	326.165	Mdh2	MDHM_RAT	Malate dehydrogenase, mitochondrial OS=Rattus norvegicus GN=Mdh2 PE=1 SV=2	tr|A0A1L8EI00|A0A1L8EI00_HAEIR	Putative nad-dependent malate dehydrogenase OS=Haematobia irritans PE=3 SV=1	IPR001236:Lactate/malate dehydrogenase, N-terminal	GO:0016491	oxidoreductase activity	path:ko00020,path:ko00270,path:ko00620,path:ko00630,path:ko00710	Citrate cycle (TCA cycle)|Cysteine and methionine metabolism|Pyruvate metabolism|Glyoxylate and dicarboxylate metabolism|Carbon fixation in photosynthetic organisms
evm.model.Contig11.188	2.32745	2.28848	2.7643	6.26749	5.65271	6.36788	6.05911	12.1457	7.23592	7.14026	2.86288	2.155	255.136	244.695	323.972				tr|A0A0L0CDY0|A0A0L0CDY0_LUCCU	Putative chitinase 3 OS=Lucilia cuprina GN=FF38_07454 PE=4 SV=1	IPR011583:Chitinase II	GO:0005975	carbohydrate metabolic process	path:ko00520	Amino sugar and nucleotide sugar metabolism
evm.model.Contig65.65	677.232	797.125	661.987	901.855	1020.18	1028.04	542.34	475.62	496.749	290.896	199.169	284.696	332.871	296.173	323.918	RpS21	RS21_CERCA	40S ribosomal protein S21 OS=Ceratitis capitata GN=RpS21 PE=2 SV=1	tr|A0A1L8EH85|A0A1L8EH85_HAEIR	40S ribosomal protein S21 OS=Haematobia irritans PE=3 SV=1	IPR001931:Ribosomal protein S21e	GO:0003735	structural constituent of ribosome	path:ko03010	Ribosome
evm.model.Contig5.215	16.4965	13.5131	15.0691	12.1256	14.3755	10.5602	8.70457	7.55941	9.67635	193.187	83.2845	160.036	539.623	487.503	318.866	HMOX1	HMOX1_HUMAN	Heme oxygenase 1 OS=Homo sapiens GN=HMOX1 PE=1 SV=1	tr|A0A0L0C010|A0A0L0C010_LUCCU	Uncharacterized protein OS=Lucilia cuprina GN=FF38_12934 PE=4 SV=1	IPR002051:Haem oxygenase	GO:0004392	heme oxygenase (decyclizing activity)	path:ko00860,path:ko04066,path:ko04216,path:ko04978,path:ko05200,path:ko05206,path:ko05225,path:ko05418	Porphyrin and chlorophyll metabolism|HIF-1 signaling pathway|Ferroptosis|Mineral absorption|Pathways in cancer|MicroRNAs in cancer|Hepatocellular carcinoma|Fluid shear stress and atherosclerosis
evm.model.Contig27.106	31.0159	45.2103	39.1622	1.06828	3.18239	1.6369	30.5553	32.0278	28.9651	201.875	10.9014	169.279	244.456	208.752	315.494				tr|A0A0L0CQL8|A0A0L0CQL8_LUCCU	Uncharacterized protein OS=Lucilia cuprina GN=FF38_00521 PE=4 SV=1
evm.model.Contig2.640	384.277	409.304	443.712	229.216	249.652	220.849	248.806	278.382	262.543	222.291	177.48	191.575	326.64	339.725	315.206	eff	UBCD1_DROME	Ubiquitin-conjugating enzyme E2-17 kDa OS=Drosophila melanogaster GN=eff PE=2 SV=1	tr|A0A1W4VMH1|A0A1W4VMH1_DROFC	ubiquitin-conjugating enzyme E2-17 kDa OS=Drosophila ficusphila GN=LOC108098811 PE=3 SV=1	IPR000608:Ubiquitin-conjugating enzyme E2			path:ko04013,path:ko04120,path:ko04141,path:ko04624	MAPK signaling pathway - fly|Ubiquitin mediated proteolysis|Protein processing in endoplasmic reticulum|Toll and Imd signaling pathway
evm.model.Contig43.60	37.2539	37.3939	36.9656	53.6081	45.1465	43.3041	163.765	191.7	180.216	579.588	400.947	503.781	394.443	490.747	314.282	Gel	GELS_DROME	Gelsolin OS=Drosophila melanogaster GN=Gel PE=1 SV=2	tr|A0A0L0CJJ3|A0A0L0CJJ3_LUCCU	Gelsolin (Fragment) OS=Lucilia cuprina GN=FF38_04978 PE=4 SV=1	IPR007122:Villin/Gelsolin	GO:0005509	calcium ion binding	path:ko04666,path:ko04810,path:ko05203	Fc gamma R-mediated phagocytosis|Regulation of actin cytoskeleton|Viral carcinogenesis
evm.model.Contig82.65	258.073	245.495	235.323	94.2692	134.281	116.509	702.636	746.955	669.329	460.618	279.631	535.458	362.812	372.304	312.424	ost-1	SPRC_CAEEL	SPARC OS=Caenorhabditis elegans GN=ost-1 PE=1 SV=1	tr|A0A0L0CSX0|A0A0L0CSX0_LUCCU	Uncharacterized protein OS=Lucilia cuprina GN=FF38_02751 PE=4 SV=1	IPR003645:Follistatin-like, N-terminal	GO:0005509	calcium ion binding
evm.model.Contig45.92	543.129	518.294	692.566	107.244	148.986	152.115	1043.15	1565.08	1386.99	388.082	200.686	345.42	305.466	282.003	311.395	Vha16-1	VATL_DROME	V-type proton ATPase 16 kDa proteolipid subunit OS=Drosophila melanogaster GN=Vha16-1 PE=2 SV=1	tr|A0A1L8EBZ1|A0A1L8EBZ1_HAEIR	V-type proton ATPase proteolipid subunit (Fragment) OS=Haematobia irritans PE=3 SV=1	IPR000245:V-ATPase proteolipid subunit	GO:0015078	hydrogen ion transmembrane transporter activity	path:ko00190,path:ko04142,path:ko04145,path:ko04721,path:ko04966,path:ko05110,path:ko05120,path:ko05152,path:ko05323	Oxidative phosphorylation|Lysosome|Phagosome|Synaptic vesicle cycle|Collecting duct acid secretion|Vibrio cholerae infection|Epithelial cell signaling in Helicobacter pylori infection|Tuberculosis|Rheumatoid arthritis
evm.model.Contig29.28	6.09504	6.49923	5.57864	8.43528	10.622	7.61966	9.24895	3.0397	8.59272	49.4271	41.9293	35.8741	568.824	618.459	311.203	Hsp26	HSP26_DROME	Heat shock protein 26 OS=Drosophila melanogaster GN=Hsp26 PE=1 SV=2	tr|O01718|O01718_SARCR	23kDa heat shock protein ScHSP23 OS=Sarcophaga crassipalpis PE=2 SV=1	IPR001436:Alpha crystallin/Heat shock protein
evm.model.Contig31.186	144.146	152.104	171.446	79.8069	86.4945	83.5082	87.6531	122.806	121.906	109.256	85.2151	98.1891	325.113	299.989	308.668	eIF5	IF5_DROME	Eukaryotic translation initiation factor 5 OS=Drosophila melanogaster GN=eIF5 PE=1 SV=1	tr|A0A0L0BM06|A0A0L0BM06_LUCCU	Eukaryotic translation initiation factor 5 OS=Lucilia cuprina GN=FF38_08366 PE=4 SV=1	IPR003307:W2 domain	GO:0005515	protein binding	path:ko03013,path:ko04214	RNA transport|Apoptosis - fly
evm.model.Contig4.703	100.307	89.8609	85.3468	88.5951	81.7062	60.5181	101.249	94.6206	90.7728	336.639	202.96	252.484	342.447	298.099	304.291	Lipt1	LIPT_MOUSE	Lipoyltransferase 1, mitochondrial OS=Mus musculus GN=Lipt1 PE=1 SV=1	tr|A0A0L0C5J7|A0A0L0C5J7_LUCCU	Uncharacterized protein OS=Lucilia cuprina GN=FF38_10595 PE=4 SV=1	IPR004143:Biotinyl protein ligase (BPL) and lipoyl protein ligase (LPL), catalytic domain	GO:0009249	protein lipoylation	path:ko00785	Lipoic acid metabolism
evm.model.Contig144.41	2277.12	2284.16	2197.25	1696.16	1702.6	1646.78	1840.06	1942.39	1972.49	606.807	855.951	514.695	376.883	327.834	303.244				tr|A0A0L0C401|A0A0L0C401_LUCCU	Uncharacterized protein OS=Lucilia cuprina GN=FF38_05381 PE=4 SV=1	IPR006721:ATP synthase, F1 complex, epsilon subunit, mitochondrial	GO:0000275	mitochondrial proton-transporting ATP synthase complex, catalytic core F(1)	path:ko00190,path:ko04714,path:ko05010,path:ko05012,path:ko05016	Oxidative phosphorylation|Thermogenesis|Alzheimer's disease|Parkinson's disease|Huntington's disease
evm.model.Contig18.86	81.069	70.0255	76.5961	77.8979	65.037	62.2576	118.904	89.5884	99.3687	344.813	296.811	337.331	321.947	261.201	298.711	Oda	OAZ_DROME	Ornithine decarboxylase antizyme OS=Drosophila melanogaster GN=Oda PE=2 SV=2	tr|A0A1A9UKZ6|A0A1A9UKZ6_GLOAU	Uncharacterized protein OS=Glossina austeni PE=4 SV=1	IPR002993:Ornithine decarboxylase antizyme	GO:0008073	ornithine decarboxylase inhibitor activity
evm.model.Contig52.93	18.2932	17.6402	19.2023	16.1198	15.5433	11.7069	8.79619	3.91475	7.38417	144.43	69.546	115.334	285.455	270.641	297.258				tr|A0A0L0CKH1|A0A0L0CKH1_LUCCU	Uncharacterized protein OS=Lucilia cuprina GN=FF38_14499 PE=4 SV=1
evm.model.Contig21.273	74.4854	39.8088	57.8708	33.4571	29.1818	15.9819	110.195	103.899	163.685	231.373	193.554	180.328	243.962	300.715	296.903	Lsd-2	LSD2_DROME	Lipid storage droplets surface-binding protein 2 OS=Drosophila melanogaster GN=Lsd-2 PE=1 SV=1	tr|A0A1I8NSA6|A0A1I8NSA6_STOCA	Uncharacterized protein OS=Stomoxys calcitrans GN=106081427 PE=4 SV=1	IPR004279:Perilipin			path:ko03320	PPAR signaling pathway
evm.model.Contig9.457	1335.81	1514.02	1309.51	1738.26	1689.4	1377.21	1467.46	1669.53	2035.17	1200.19	2666.94	835.113	373.654	351.171	295.601	Ald	ALF_DROME	Fructose-bisphosphate aldolase OS=Drosophila melanogaster GN=Ald PE=1 SV=5	tr|A0A0L0CB25|A0A0L0CB25_LUCCU	Fructose-bisphosphate aldolase OS=Lucilia cuprina GN=FF38_00343 PE=3 SV=1	IPR000741:Fructose-bisphosphate aldolase, class-I	GO:0004332	fructose-bisphosphate aldolase activity	path:ko00010,path:ko00030,path:ko00051,path:ko00680,path:ko00710	Glycolysis / Gluconeogenesis|Pentose phosphate pathway|Fructose and mannose metabolism|Methane metabolism|Carbon fixation in photosynthetic organisms
evm.model.Contig177.25	160.528	131.375	123.999	120.407	134.95	171.378	159.874	175.93	219.609	134.296	105.653	140.777	307.672	346.561	293.846	Spase12	SPCS1_DROME	Signal peptidase complex subunit 1 OS=Drosophila melanogaster GN=Spase12 PE=1 SV=2	tr|A0A0L0BZ22|A0A0L0BZ22_LUCCU	Signal peptidase complex subunit 1 OS=Lucilia cuprina GN=FF38_09616 PE=4 SV=1	IPR009542:Microsomal signal peptidase 12kDa subunit	GO:0005787	signal peptidase complex	path:ko03060	Protein export
evm.model.Contig46.150	183.654	157.925	179.614	309.28	356.24	651.896	591.562	652.328	630.429	41.7831	193.307	44.4195	277.816	267.091	292.962				tr|A0A0L0CID6|A0A0L0CID6_LUCCU	Uncharacterized protein OS=Lucilia cuprina GN=FF38_12368 PE=4 SV=1
evm.model.Contig80.103	0.13333	0.162566	0.060976	0.135517	0.133106	0.201484	0.129558	0	0.0618539	3.92776	0.387394	2.48122	55.1208	49.2758	292.472				tr|A0A0L0BL72|A0A0L0BL72_LUCCU	Uncharacterized protein OS=Lucilia cuprina GN=FF38_07715 PE=4 SV=1
evm.model.Contig77.26	559.985	443.577	542.527	418.786	429.314	395.111	540.666	592.041	575.424	337.825	257.19	338.251	284.032	289.414	291.87	ETFB	ETFB_HUMAN	Electron transfer flavoprotein subunit beta OS=Homo sapiens GN=ETFB PE=1 SV=3	tr|A0A0L0BYC8|A0A0L0BYC8_LUCCU	Uncharacterized protein (Fragment) OS=Lucilia cuprina GN=FF38_11859 PE=4 SV=1	IPR014730:Electron transfer flavoprotein, alpha/beta-subunit, N-terminal	GO:0009055	electron carrier activity
evm.model.Contig16.303	57.8913	55.2728	50.4792	87.909	85.0143	108.584	78.8736	128.427	107.744	162.442	101.65	134.373	362.009	309.227	291.685	Qdpr	DHPR_RAT	Dihydropteridine reductase OS=Rattus norvegicus GN=Qdpr PE=1 SV=1	tr|A0A0L0CKU6|A0A0L0CKU6_LUCCU	Uncharacterized protein (Fragment) OS=Lucilia cuprina GN=FF38_00015 PE=4 SV=1	IPR002347:Short-chain dehydrogenase/reductase SDR			path:ko00790	Folate biosynthesis
evm.model.Contig6.236	2.35279	3.88512	1.05188	4.37045	2.70185	16.3925	0	1.15314	1.65154	9.9047	5.77453	14.7494	919.786	289.865	291.056	Egfr	DEFI_PROTE	Phormicin OS=Protophormia terraenovae PE=1 SV=2	tr|D9J139|D9J139_LUCSE	Lucifensin OS=Lucilia sericata PE=2 SV=1	IPR001542:Defensin, invertebrate/fungal	GO:0006952	defense response
evm.model.Contig1.362	231.228	174.246	192.567	31.0566	69.0106	50.6331	188.918	307.574	268.569	147.903	114.381	139.031	228.314	190.752	290.856				tr|A0A0L0CNW1|A0A0L0CNW1_LUCCU	Uncharacterized protein OS=Lucilia cuprina GN=FF38_03644 PE=4 SV=1	IPR006175:YjgF/YER057c/UK114 family
evm.model.Contig6.238	0.580771	1.27908	0.518304	3.24977	7.50231	8.1121	0.561914	0	1.63465	4.36151	6.30035	16.3844	872.357	521.92	289.482	Egfr	DEFI_PROTE	Phormicin OS=Protophormia terraenovae PE=1 SV=2	tr|D9J139|D9J139_LUCSE	Lucifensin OS=Lucilia sericata PE=2 SV=1	IPR001542:Defensin, invertebrate/fungal	GO:0006952	defense response
evm.model.Contig23.153	66.795	69.2473	64.342	80.8014	95.0624	98.8985	108.824	134.662	130.801	323.904	255.082	333.767	295.773	334.138	288.987	Pcd	PHS_DROVI	Pterin-4-alpha-carbinolamine dehydratase OS=Drosophila virilis GN=Pcd PE=3 SV=1	tr|A0A0L0CEJ5|A0A0L0CEJ5_LUCCU	Uncharacterized protein OS=Lucilia cuprina GN=FF38_11683 PE=3 SV=1	IPR001533:Transcriptional coactivator/pterin dehydratase	GO:0006729	tetrahydrobiopterin biosynthetic process	path:ko00790	Folate biosynthesis
evm.model.Contig10.403	1.01486	0.513592	1.84554	0.353002	0.784307	0.975094	14.4087	3.47402	13.7261	262.08	71.2208	238.87	285.222	337.452	288.862				tr|A0A1I8PR62|A0A1I8PR62_STOCA	Uncharacterized protein OS=Stomoxys calcitrans GN=106085300 PE=3 SV=1
evm.model.Contig4.441	371.134	401.235	355.626	104.892	247.237	211.599	463.725	837.7	734.12	548.643	718.763	403.39	247.151	364.263	288.517	Pepck	PCKG_DROME	Phosphoenolpyruvate carboxykinase [GTP] OS=Drosophila melanogaster GN=Pepck PE=2 SV=2	tr|A0A0L0BSV4|A0A0L0BSV4_LUCCU	Phosphoenolpyruvate carboxykinase [GTP] OS=Lucilia cuprina GN=FF38_06396 PE=3 SV=1	IPR035077:Phosphoenolpyruvate carboxykinase, GTP-utilising, C-terminal	GO:0004611	phosphoenolpyruvate carboxykinase activity	path:ko00010,path:ko00020,path:ko00620,path:ko03320,path:ko04068,path:ko04151,path:ko04152,path:ko04910,path:ko04920,path:ko04922,path:ko04931,path:ko04964	Glycolysis / Gluconeogenesis|Citrate cycle (TCA cycle)|Pyruvate metabolism|PPAR signaling pathway|FoxO signaling pathway|PI3K-Akt signaling pathway|AMPK signaling pathway|Insulin signaling pathway|Adipocytokine signaling pathway|Glucagon signaling pathway|Insulin resistance|Proximal tubule bicarbonate reclamation
evm.model.Contig45.113	71.7312	69.2773	71.6764	56.5738	63.5227	61.2546	58.3166	73.2379	69.5369	162.228	103.609	195.295	311.889	329.457	284.814	Rpn6	PSD11_DROME	26S proteasome non-ATPase regulatory subunit 11 OS=Drosophila melanogaster GN=Rpn6 PE=1 SV=1	tr|A0A0L0CQG8|A0A0L0CQG8_LUCCU	26S proteasome non-ATPase regulatory subunit 11 OS=Lucilia cuprina GN=FF38_09382 PE=4 SV=1	IPR000717:Proteasome component (PCI) domain	GO:0043248	proteasome assembly	path:ko03050,path:ko05169	Proteasome|Epstein-Barr virus infection
evm.model.Contig3.1109	1286.46	1249.3	1260.11	1220.48	1334.39	1082.88	1267.56	1284.34	1183.56	316.117	356.259	276.551	331.369	305.629	281.614	porin	VDAC_DROME	Voltage-dependent anion-selective channel OS=Drosophila melanogaster GN=porin PE=1 SV=3	tr|A0A0L0BZA3|A0A0L0BZA3_LUCCU	Voltage-dependent anion-selective channel OS=Lucilia cuprina GN=FF38_07612 PE=4 SV=1	IPR027246:Eukaryotic porin/Tom40	GO:0005741	mitochondrial outer membrane	path:ko04020,path:ko04022,path:ko04216,path:ko04217,path:ko04218,path:ko04621,path:ko04979,path:ko05012,path:ko05016,path:ko05166	Calcium signaling pathway|cGMP-PKG signaling pathway|Ferroptosis|Necroptosis|Cellular senescence|NOD-like receptor signaling pathway|Cholesterol metabolism|Parkinson's disease|Huntington's disease|HTLV-I infection
evm.model.Contig2.446	1.65068	1.67236	1.62776	0.47404	1.7173	1.98931	10.328	15.5277	11.8169	87.6158	40.5728	82.6064	309.035	361.789	281.144				tr|A0A1I8NIQ8|A0A1I8NIQ8_MUSDO	Uncharacterized protein OS=Musca domestica GN=101891284 PE=4 SV=1
evm.model.Contig12.388	0.143193	0.159926	0.262696	0.148916	0.0978886	0.148899	0.180909	0	0	0.403908	0.815511	0.32592	207.755	218.615	280.474				tr|A0A0L0CCZ8|A0A0L0CCZ8_LUCCU	Uncharacterized protein OS=Lucilia cuprina GN=FF38_02388 PE=3 SV=1	IPR000215:Serpin family	GO:0005615	extracellular space	path:ko05146	Amoebiasis
evm.model.Contig36.183	846.831	726.596	750.368	617.848	835.574	727.747	584.946	745.416	625.368	266.667	289.274	244.921	345.076	246.659	277.768						IPR015157:Translation machinery associated TMA7
evm.model.Contig24.188	421.14	378.092	399.441	138.479	199.402	265.112	267.686	592.705	692.85	104.447	91.5716	95.8547	287.045	249.775	277.167	Ssr2	SSRB_MOUSE	Translocon-associated protein subunit beta OS=Mus musculus GN=Ssr2 PE=1 SV=1	tr|A0A0L0CLW7|A0A0L0CLW7_LUCCU	Translocon-associated protein subunit beta OS=Lucilia cuprina GN=FF38_06232 PE=3 SV=1				path:ko04141	Protein processing in endoplasmic reticulum
evm.model.Contig91.21	4.54787	6.44645	6.49503	3.23801	2.36859	2.66446	6.04881	6.20567	6.6105	21.4698	9.0599	22.4026	201.858	213.665	276.838	CG11880	CTLH2_DROME	CTL-like protein 2 OS=Drosophila melanogaster GN=CG11880 PE=3 SV=1	tr|A0A1I8NC65|A0A1I8NC65_MUSDO	Uncharacterized protein OS=Musca domestica GN=101895250 PE=3 SV=1	IPR007603:Choline transporter-like			path:ko05231	Choline metabolism in cancer
evm.model.Contig28.159	788.078	776.709	896.608	340.234	374.036	334.647	436.178	437.981	426.492	378.484	310.609	314.782	277.033	286.11	276.623	STUB1	YBOXH_APLCA	Y-box factor homolog OS=Aplysia californica PE=2 SV=1	tr|A0A0L0CRV8|A0A0L0CRV8_LUCCU	Uncharacterized protein OS=Lucilia cuprina GN=FF38_12275 PE=4 SV=1	IPR011129:Cold shock domain	GO:0003676	nucleic acid binding
evm.model.Contig13.443	237.65	214.268	201.719	112.861	136.839	148.674	163.733	200.073	220.965	152.157	121.891	146.364	297.549	297.795	276.21	Spase22-23	SPCS3_DROME	Signal peptidase complex subunit 3 OS=Drosophila melanogaster GN=Spase22-23 PE=2 SV=1	tr|A0A0L0BP03|A0A0L0BP03_LUCCU	Signal peptidase complex subunit 3 OS=Lucilia cuprina GN=FF38_11586 PE=4 SV=1	IPR007653:Signal peptidase complex subunit 3	GO:0005787	signal peptidase complex	path:ko03060	Protein export
evm.model.Contig32.65	236.149	201.472	215.114	137.015	178.705	189.735	193.034	215.454	243.348	218.504	150.412	189.069	278.443	268.707	273.338	ARF1	ARF1_LOCMI	ADP-ribosylation factor 1 OS=Locusta migratoria GN=ARF1 PE=2 SV=2	tr|A0A1D2NEH3|A0A1D2NEH3_ORCCI	ADP-ribosylation factor 1 OS=Orchesella cincta GN=Ocin01_03297 PE=3 SV=1	IPR006689:Small GTPase superfamily, ARF/SAR type	GO:0005525	GTP binding	path:ko04072,path:ko04144,path:ko05110,path:ko05134	Phospholipase D signaling pathway|Endocytosis|Vibrio cholerae infection|Legionellosis
evm.model.Contig112.45	33.5738	29.2706	25.1987	3.9667	7.12155	4.26148	46.0829	41.564	44.6337	349.721	122.141	366.606	277.145	283.078	272.662				tr|A0A0L0BQQ8|A0A0L0BQQ8_LUCCU	Uncharacterized protein OS=Lucilia cuprina GN=FF38_05885 PE=4 SV=1
evm.model.Contig34.196	126.471	118.225	109.017	158.428	165.366	120.641	310.845	274.823	356.379	356.822	269.254	293.514	231.847	276.668	270.683	ALDH2	ALDH2_MESAU	Aldehyde dehydrogenase, mitochondrial OS=Mesocricetus auratus GN=ALDH2 PE=1 SV=1	tr|A0A1I8QDB6|A0A1I8QDB6_STOCA	Uncharacterized protein OS=Stomoxys calcitrans GN=106085604 PE=3 SV=1	IPR015590:Aldehyde dehydrogenase domain	GO:0008152	metabolic process	path:ko00010,path:ko00053,path:ko00071,path:ko00280,path:ko00310,path:ko00330,path:ko00340,path:ko00380,path:ko00410,path:ko00561,path:ko00620,path:ko00625,path:ko00903,path:ko00981	Glycolysis / Gluconeogenesis|Ascorbate and aldarate metabolism|Fatty acid degradation|Valine, leucine and isoleucine degradation|Lysine degradation|Arginine and proline metabolism|Histidine metabolism|Tryptophan metabolism|beta-Alanine metabolism|Glycerolipid metabolism|Pyruvate metabolism|Chloroalkane and chloroalkene degradation|Limonene and pinene degradation|Insect hormone biosynthesis
evm.model.Contig104.14	5.13306	7.04425	3.71327	1.09555	2.2004	1.11481	2.13087	1.06625	2.39351	10.3562	1.99855	3.47251	135.589	146	267.508				tr|A0A0L0C763|A0A0L0C763_LUCCU	Uncharacterized protein OS=Lucilia cuprina GN=FF38_14106 PE=4 SV=1	IPR031984:Solute carrier family 3 member 2, N-terminal domain
evm.model.Contig40.92	29.0472	30.1038	23.9292	34.6241	45.271	28.0101	42.35	39.3091	33.968	99.8244	64.9652	89.3207	277.729	232.521	265.662				tr|A0A0L0BQE3|A0A0L0BQE3_LUCCU	Uncharacterized protein OS=Lucilia cuprina GN=FF38_01866 PE=3 SV=1	IPR000215:Serpin family	GO:0005615	extracellular space
evm.model.Contig16.291	0.217262	0.258461	0.199247	4.16763	1.59088	9.46519	0.33174	0.0900435	0.0881217	3.78292	1.55569	1.19253	174.203	148.508	264.612	ImpE2	IMPE2_DROME	20-hydroxyecdysone protein OS=Drosophila melanogaster GN=ImpE2 PE=1 SV=1	tr|A0A0L0CES5|A0A0L0CES5_LUCCU	20-hydroxyecdysone protein (Fragment) OS=Lucilia cuprina GN=FF38_06639 PE=4 SV=1
evm.model.Contig7.614	138.973	93.4939	127.498	91.334	83.641	86.17	307.029	431.424	392.106	615.599	211.905	497.755	291.187	288.522	262.813	SCP2	NLTP_RABIT	Non-specific lipid-transfer protein OS=Oryctolagus cuniculus GN=SCP2 PE=1 SV=1	tr|A0A0L0C9T9|A0A0L0C9T9_LUCCU	Uncharacterized protein OS=Lucilia cuprina GN=FF38_10142 PE=4 SV=1	IPR003033:SCP2 sterol-binding domain	GO:0008152	metabolic process	path:ko00120,path:ko03320,path:ko04146	Primary bile acid biosynthesis|PPAR signaling pathway|Peroxisome
evm.model.Contig84.43	0.786139	0	0.945366	1.49878	1.30716	0.747286	2.43925	68.3247	77.8901	193.731	421.025	1082.78	990.074	402.395	261.613	Sema-1a	ARY1_CALVI	Arylphorin subunit A4 OS=Calliphora vicina PE=2 SV=1	tr|O18321|O18321_CALVI	Arylphorin OS=Calliphora vicina PE=2 SV=1	IPR013788:Hemocyanin/hexamerin
evm.model.Contig157.23	63.3533	55.8112	51.6927	16.09	26.4544	16.2498	193.717	153.672	205.8	569.317	255.896	607.852	256.42	276.125	261.018				tr|A0A0L0BNF1|A0A0L0BNF1_LUCCU	Uncharacterized protein OS=Lucilia cuprina GN=FF38_12628 PE=4 SV=1
evm.model.Contig55.24	79.2483	76.5469	74.7534	90.8448	94.6713	107.517	69.2927	78.1095	87.8177	199.961	116.337	178.928	274.43	295.188	258.274	Rpt2	PRS4_DROME	26S protease regulatory subunit 4 OS=Drosophila melanogaster GN=Rpt2 PE=1 SV=2	tr|A0A1I8QEI4|A0A1I8QEI4_STOCA	Uncharacterized protein OS=Stomoxys calcitrans GN=106096245 PE=3 SV=1	IPR003959:ATPase, AAA-type, core	GO:0036402	proteasome-activating ATPase activity	path:ko03050,path:ko05165,path:ko05169,path:ko05203	Proteasome|Human papillomavirus infection|Epstein-Barr virus infection|Viral carcinogenesis
evm.model.Contig29.173	97.281	93.5395	97.4543	10.8572	18.379	10.1464	236.212	253.475	245.215	107.703	83.0321	124.197	304.115	469.747	256.4	Hn	PH4H_DROME	Protein henna OS=Drosophila melanogaster GN=Hn PE=2 SV=3	tr|A0A0L0BY41|A0A0L0BY41_LUCCU	Protein henna OS=Lucilia cuprina GN=FF38_08703 PE=4 SV=1	IPR002912:ACT domain	GO:0016714	oxidoreductase activity, acting on paired donors, with incorporation or reduction of molecular oxygen, reduced pteridine as one donor, and incorporation of one atom of oxygen	path:ko00360,path:ko00400,path:ko00790	Phenylalanine metabolism|Phenylalanine, tyrosine and tryptophan biosynthesis|Folate biosynthesis
evm.model.Contig65.86	118.326	56.3495	121.306	68.6443	34.7773	62.2297	153.092	275.077	241.248	86.1518	56.1117	93.3845	266.66	488.293	255.284	Ance	ACE_DROME	Angiotensin-converting enzyme OS=Drosophila melanogaster GN=Ance PE=1 SV=3	tr|A0A0L0BM89|A0A0L0BM89_LUCCU	Angiotensin-converting enzyme OS=Lucilia cuprina GN=FF38_00036 PE=3 SV=1	IPR001548:Peptidase M2, peptidyl-dipeptidase A	GO:0006508	proteolysis	path:ko04614,path:ko04924,path:ko05142,path:ko05410	Renin-angiotensin system|Renin secretion|Chagas disease (American trypanosomiasis)|Hypertrophic cardiomyopathy (HCM)
evm.model.Contig8.448	149.741	133.887	130.226	77.3803	98.4867	112.793	106.525	162.938	189.826	105.584	82.7047	95.2278	300.092	287.898	254.749	SEC11C	SC11C_PONAB	Signal peptidase complex catalytic subunit SEC11C OS=Pongo abelii GN=SEC11C PE=2 SV=3	tr|A0A0L0BUU5|A0A0L0BUU5_LUCCU	Signal peptidase complex catalytic subunit SEC11 OS=Lucilia cuprina GN=FF38_01278 PE=3 SV=1	IPR001733:Peptidase S26B	GO:0006465	signal peptide processing	path:ko03060	Protein export
evm.model.Contig17.233	1225.23	1292.51	1374.52	610.101	682.324	645.933	445.592	505.214	446.156	287.722	232.45	240.639	299.875	262.162	254.652	Nacalpha	NACA_DROME	Nascent polypeptide-associated complex subunit alpha OS=Drosophila melanogaster GN=Nacalpha PE=1 SV=2	tr|A0A0L0C5N2|A0A0L0C5N2_LUCCU	Nascent polypeptide-associated complex subunit alpha OS=Lucilia cuprina GN=FF38_11384 PE=4 SV=1	IPR016641:Nascent polypeptide-associated complex subunit alpha	GO:0005854	nascent polypeptide-associated complex
evm.model.Contig132.81	101.024	98.6262	97.6827	106.557	112.894	113.148	146.37	175.308	181.788	299.938	209.064	281.757	261.488	263.115	254.573	GDI1	GDIA_BOVIN	Rab GDP dissociation inhibitor alpha OS=Bos taurus GN=GDI1 PE=1 SV=1	tr|A0A0L0C761|A0A0L0C761_LUCCU	Rab GDP dissociation inhibitor OS=Lucilia cuprina GN=FF38_06263 PE=3 SV=1	IPR018203:GDP dissociation inhibitor	GO:0005092	GDP-dissociation inhibitor activity
evm.model.Contig68.70	48.1766	40.4465	42.3051	84.3034	78.9269	54.358	330.475	133.106	225.418	536.211	164.933	374.825	315.786	217.043	252.51	hsdl2	HSDL2_DANRE	Hydroxysteroid dehydrogenase-like protein 2 OS=Danio rerio GN=hsdl2 PE=2 SV=1	tr|A0A0L0CQB6|A0A0L0CQB6_LUCCU	Uncharacterized protein OS=Lucilia cuprina GN=FF38_09370 PE=4 SV=1	IPR002347:Short-chain dehydrogenase/reductase SDR
evm.model.Contig4.442	343.91	383.995	372.294	67.6481	153.065	130.117	416.358	780.528	630.489	506.58	578.484	363.133	223.121	338.208	252.101	Pepck	PCKG_DROME	Phosphoenolpyruvate carboxykinase [GTP] OS=Drosophila melanogaster GN=Pepck PE=2 SV=2	tr|A0A0L0BSV4|A0A0L0BSV4_LUCCU	Phosphoenolpyruvate carboxykinase [GTP] OS=Lucilia cuprina GN=FF38_06396 PE=3 SV=1	IPR035077:Phosphoenolpyruvate carboxykinase, GTP-utilising, C-terminal	GO:0004611	phosphoenolpyruvate carboxykinase activity	path:ko00010,path:ko00020,path:ko00620,path:ko03320,path:ko04068,path:ko04151,path:ko04152,path:ko04910,path:ko04920,path:ko04922,path:ko04931,path:ko04964	Glycolysis / Gluconeogenesis|Citrate cycle (TCA cycle)|Pyruvate metabolism|PPAR signaling pathway|FoxO signaling pathway|PI3K-Akt signaling pathway|AMPK signaling pathway|Insulin signaling pathway|Adipocytokine signaling pathway|Glucagon signaling pathway|Insulin resistance|Proximal tubule bicarbonate reclamation
evm.model.Contig139.47	207.432	163.659	188.418	213.656	225.249	529.548	614.06	1012.47	782.809	168.74	287.324	187.101	201.839	253.011	251.932	SSPO	SSPO_BOVIN	SCO-spondin OS=Bos taurus GN=SSPO PE=2 SV=2	tr|A0A0L0C8C8|A0A0L0C8C8_LUCCU	Uncharacterized protein OS=Lucilia cuprina GN=FF38_05723 PE=4 SV=1	IPR002509:NodB homology domain	GO:0005515	protein binding
evm.model.Contig40.126	380.143	353.47	342.395	132.862	183.801	252.515	274.853	507.525	616.197	99.8209	79.0895	93.4312	264.912	192.067	250.985	SSR3	SSRG_HUMAN	Translocon-associated protein subunit gamma OS=Homo sapiens GN=SSR3 PE=1 SV=1	tr|A0A0L0CHP8|A0A0L0CHP8_LUCCU	Uncharacterized protein OS=Lucilia cuprina GN=FF38_10235 PE=4 SV=1	IPR009779:Translocon-associated protein subunit gamma	GO:0006614	SRP-dependent cotranslational protein targeting to membrane	path:ko04141	Protein processing in endoplasmic reticulum
evm.model.Contig63.28	622.979	642.242	650.43	240.353	266.943	250.182	260.807	254.086	253.476	292.042	209.257	238.033	241.487	244.462	250.032	EIF1AX	IF1AX_PONAB	Eukaryotic translation initiation factor 1A, X-chromosomal OS=Pongo abelii GN=EIF1AX PE=2 SV=3	tr|A0A0K8TR31|A0A0K8TR31_TABBR	Putative translation initiation factor 1a eif-1a OS=Tabanus bromius PE=2 SV=1	IPR006196:RNA-binding domain, S1, IF1 type	GO:0003743	translation initiation factor activity	path:ko03013	RNA transport
evm.model.Contig1.801	136.41	153.407	144.116	47.352	54.468	50.6111	65.2383	134.023	154.272	60.1322	49.4029	54.2394	430.571	363.727	248.955				tr|A0A0L0C943|A0A0L0C943_LUCCU	Uncharacterized protein OS=Lucilia cuprina GN=FF38_00469 PE=3 SV=1	IPR013766:Thioredoxin domain	GO:0045454	cell redox homeostasis	path:ko04141	Protein processing in endoplasmic reticulum
evm.model.Contig14.95	426.095	364.756	416.982	111.797	137.06	196.595	263.266	680.462	741.067	101.583	76.6411	92.0547	255.567	210.515	248.702	Ssr1	SSRA_MOUSE	Translocon-associated protein subunit alpha OS=Mus musculus GN=Ssr1 PE=1 SV=1	tr|T1PA46|T1PA46_MUSDO	Translocon-associated protein (TRAP), alpha subunit OS=Musca domestica GN=101901031 PE=2 SV=1	IPR005595:Translocon-associated protein (TRAP), alpha subunit	GO:0005789	endoplasmic reticulum membrane	path:ko04141	Protein processing in endoplasmic reticulum
evm.model.Contig153.39	50.546	53.6993	57.348	53.8713	65.3956	68.6801	53.8771	66.2152	64.6476	154.88	92.9315	138.082	272.549	318.954	248.692	Rpn3	PSMD3_DROME	Probable 26S proteasome non-ATPase regulatory subunit 3 OS=Drosophila melanogaster GN=Rpn3 PE=2 SV=1	tr|A0A0L0BSW7|A0A0L0BSW7_LUCCU	Putative 26S proteasome non-ATPase regulatory subunit 3 OS=Lucilia cuprina GN=FF38_07290 PE=4 SV=1	IPR000717:Proteasome component (PCI) domain	GO:0000502	proteasome complex	path:ko03050,path:ko05169	Proteasome|Epstein-Barr virus infection
evm.model.Contig72.84	802.437	933.357	812.049	2674.31	2444.93	1573.11	3530.81	3221.82	3349.98	1704.19	3642.97	1355.38	320.316	300.657	248.408	Argk	KARG_DROME	Arginine kinase OS=Drosophila melanogaster GN=Argk PE=2 SV=2	tr|A0A1L8EGM9|A0A1L8EGM9_HAEIR	Putative creatine kinase OS=Haematobia irritans PE=3 SV=1	IPR000749:ATP:guanido phosphotransferase	GO:0016301	kinase activity	path:ko00330	Arginine and proline metabolism
evm.model.Contig5.378	18.9539	16.5906	14.9141	35.4362	36.7385	22.2325	102.898	100.141	125.133	422.044	367.12	438.64	303.988	293.002	248.151	B1	EST1_CULPI	Esterase B1 OS=Culex pipiens GN=B1 PE=3 SV=1	tr|Q25252|Q25252_LUCCU	Carboxylic ester hydrolase OS=Lucilia cuprina GN=LcaE7 PE=1 SV=1	IPR002018:Carboxylesterase, type B
evm.model.Contig114.22	14.0123	13.9255	13.1256	19.4248	20.9127	17.4206	45.7422	24.6727	45.6229	177.092	240.739	202.902	495.732	392.629	247.934				tr|A0A0L0CFE7|A0A0L0CFE7_LUCCU	Uncharacterized protein OS=Lucilia cuprina GN=FF38_06989 PE=4 SV=1
evm.model.Contig84.61	0.249343	0.0173832	0.266366	0.432724	0.477546	0.306717	11.8469	133.782	258.978	189.06	105.014	478.981	367.749	91.2674	247.627	Sema-1a	ARY2_CALVI	Arylphorin subunit C223 OS=Calliphora vicina PE=2 SV=1	tr|O18320|O18320_CALVI	Arylphorin OS=Calliphora vicina PE=4 SV=1	IPR013788:Hemocyanin/hexamerin
evm.model.Contig145.56	96.4339	95.0607	91.3716	313.797	173.563	258.971	233.438	182.349	214.64	168.722	123.273	144.567	176.675	229.424	247.23	PLEKHG4B	GST_MUSDO	Glutathione S-transferase OS=Musca domestica PE=2 SV=1	tr|A0A0L0BVX2|A0A0L0BVX2_LUCCU	Uncharacterized protein OS=Lucilia cuprina GN=FF38_02174 PE=3 SV=1	IPR004046:Glutathione S-transferase, C-terminal	GO:0005515	protein binding
evm.model.Contig148.33	266.609	237.715	233.823	133.797	172.798	236.049	225.53	368.104	472.26	86.3148	82.0857	86.6496	281.439	250.972	247.198	Ssr4	SSRD_MOUSE	Translocon-associated protein subunit delta OS=Mus musculus GN=Ssr4 PE=1 SV=1	tr|A0A0L0BP32|A0A0L0BP32_LUCCU	Uncharacterized protein OS=Lucilia cuprina GN=FF38_03203 PE=4 SV=1	IPR008855:Translocon-associated	GO:0005783	endoplasmic reticulum	path:ko04141	Protein processing in endoplasmic reticulum
evm.model.Contig33.150	24.1091	18.8655	19.8929	10.3758	12.5642	10.0819	30.0776	27.7247	35.5665	423.261	81.5728	530.301	359.465	386.678	246.952	Creg1	CREG1_MOUSE	Protein CREG1 OS=Mus musculus GN=Creg1 PE=1 SV=1	tr|A0A1I8Q802|A0A1I8Q802_STOCA	Uncharacterized protein OS=Stomoxys calcitrans GN=106094370 PE=4 SV=1
evm.model.Contig9.2	325.27	277.621	268.789	222.895	258.809	206.232	327.023	474.196	519.075	295.591	417.223	248.185	342.899	323.303	246.752	AQP	AQP_CICVR	Aquaporin AQPcic OS=Cicadella viridis GN=AQP PE=1 SV=1	tr|A0A1I8NSH4|A0A1I8NSH4_STOCA	Uncharacterized protein OS=Stomoxys calcitrans GN=106084710 PE=3 SV=1	IPR000425:Major intrinsic protein	GO:0005215	transporter activity
evm.model.Contig11.369	260.669	287.021	282.737	210.02	254.308	227.352	115.395	126.499	109.316	267.763	220.343	193.391	254.899	227.51	244.759				tr|A0A1L8E885|A0A1L8E885_HAEIR	Putative cytochrome c oxidase subunit 6b-1 (Fragment) OS=Haematobia irritans PE=4 SV=1
evm.model.Contig2.794	1082.34	1004.54	985.944	1070.27	1150.62	1030.34	1184.06	1170.17	1176.98	448.058	749.811	393.044	299.103	253.381	244.287	ATPsynD	ATP5H_DROME	ATP synthase subunit d, mitochondrial OS=Drosophila melanogaster GN=ATPsynD PE=2 SV=2	tr|A0A0L0CLH8|A0A0L0CLH8_LUCCU	ATP synthase subunit d, mitochondrial OS=Lucilia cuprina GN=FF38_14011 PE=3 SV=1	IPR008689:ATP synthase, F0 complex, subunit D, mitochondrial	GO:0000276	mitochondrial proton-transporting ATP synthase complex, coupling factor F(o)	path:ko00190,path:ko04714,path:ko05010,path:ko05012,path:ko05016	Oxidative phosphorylation|Thermogenesis|Alzheimer's disease|Parkinson's disease|Huntington's disease
evm.model.Contig33.188	35.2646	33.5143	45.6354	14.8236	16.7043	11.1248	7.66813	6.30357	4.4829	51.1381	66.6388	26.0489	219.645	213.938	244.175	Slc7a6	YLAT2_MOUSE	Y+L amino acid transporter 2 OS=Mus musculus GN=Slc7a6 PE=1 SV=1	tr|A0A0L0CU71|A0A0L0CU71_LUCCU	Uncharacterized protein OS=Lucilia cuprina GN=FF38_11080 PE=4 SV=1	IPR002293:Amino acid/polyamine transporter I	GO:0003333	amino acid transmembrane transport
evm.model.Contig6.385	214.468	192.53	201.526	118.362	118.53	75.3888	87.2543	69.1141	83.3351	877.935	182.663	723.745	315.444	337.865	244.171				tr|A0A0L0BYP5|A0A0L0BYP5_LUCCU	Uncharacterized protein OS=Lucilia cuprina GN=FF38_07808 PE=4 SV=1
evm.model.Contig11.136	50.0286	47.0244	56.6564	16.7734	25.15	23.6511	5.2575	11.1976	7.73366	45.7925	18.277	55.5462	287.023	256.646	243.801	ade3	PUR2_DROME	Trifunctional purine biosynthetic protein adenosine-3 OS=Drosophila melanogaster GN=ade3 PE=1 SV=2	tr|A0A0L0BVF6|A0A0L0BVF6_LUCCU	Trifunctional purine biosynthetic protein adenosine-3 OS=Lucilia cuprina GN=FF38_00229 PE=3 SV=1	IPR002376:Formyl transferase, N-terminal	GO:0009058	biosynthetic process	path:ko00230,path:ko00670,path:ko01523	Purine metabolism|One carbon pool by folate|Antifolate resistance
evm.model.Contig84.58	0.257918	0	0.269186	0.605569	0.647793	0.244221	21.6528	115.425	419.581	109.594	139.783	410.773	274.896	137.511	243.495	Sema-1a	ARY2_CALVI	Arylphorin subunit C223 OS=Calliphora vicina PE=2 SV=1	tr|O18320|O18320_CALVI	Arylphorin OS=Calliphora vicina PE=4 SV=1	IPR013788:Hemocyanin/hexamerin
evm.model.Contig87.101	73.4936	78.3562	79.6313	108.195	115.807	130.703	74.8322	87.5041	92.303	240.796	134.71	191.572	268.391	297.435	243.216	Psmb5	PSB5_RAT	Proteasome subunit beta type-5 OS=Rattus norvegicus GN=Psmb5 PE=1 SV=3	tr|A0A0L0CBS6|A0A0L0CBS6_LUCCU	Proteasome subunit beta type OS=Lucilia cuprina GN=FF38_07371 PE=3 SV=1	IPR023333:Proteasome B-type subunit	GO:0004175	endopeptidase activity	path:ko03050	Proteasome
evm.model.Contig5.532	73.4771	73.1996	62.3522	102.548	120.333	130.614	80.8337	86.6998	93.9724	228.957	134.91	216.967	287.129	330.293	242.955	Prosbeta7	PSB4_DROME	Proteasome subunit beta type-4 OS=Drosophila melanogaster GN=Prosbeta7 PE=2 SV=1	tr|A0A1I8NMK3|A0A1I8NMK3_STOCA	Proteasome subunit beta OS=Stomoxys calcitrans GN=106085821 PE=3 SV=1	IPR016295:Proteasome endopeptidase complex, beta subunit	GO:0004298	threonine-type endopeptidase activity	path:ko03050	Proteasome
evm.model.Contig63.59	165.372	166.055	156.507	71.9903	91.0631	97.6585	112.143	164.018	184.387	118.883	88.3313	110.802	267.329	263.857	242.418	eca	TMEDE_DROWI	Transmembrane emp24 domain-containing protein eca OS=Drosophila willistoni GN=eca PE=3 SV=1	tr|A0A0L0BYF5|A0A0L0BYF5_LUCCU	Uncharacterized protein OS=Lucilia cuprina GN=FF38_04586 PE=3 SV=1	IPR009038:GOLD domain	GO:0006810	transport
evm.model.Contig148.11	162.157	111.551	130.168	51.5999	49.7588	13.363	198.519	300.68	290.339	455.436	495.336	402.165	239.239	453.14	241.755	PRDX6	PRDX6_CHICK	Peroxiredoxin-6 OS=Gallus gallus GN=PRDX6 PE=2 SV=3	tr|A0A0L0BP86|A0A0L0BP86_LUCCU	Uncharacterized protein OS=Lucilia cuprina GN=FF38_03212 PE=4 SV=1	IPR000866:Alkyl hydroperoxide reductase subunit C/ Thiol specific antioxidant	GO:0051920	peroxiredoxin activity	path:ko00940	Phenylpropanoid biosynthesis
evm.model.Contig6.330	91.8231	70.0712	74.0622	49.0216	48.1492	49.963	84.9721	129.616	114.705	153.669	77.2168	161.823	269.233	235.21	240.915	Mlc-c	MLC2_DROME	Myosin-2 essential light chain OS=Drosophila melanogaster GN=Mlc-c PE=1 SV=1	tr|A0A0L0CB99|A0A0L0CB99_LUCCU	Myosin-2 essential light chain OS=Lucilia cuprina GN=FF38_11572 PE=4 SV=1	IPR002048:EF-hand domain	GO:0005509	calcium ion binding	path:ko04270,path:ko04530,path:ko04921	Vascular smooth muscle contraction|Tight junction|Oxytocin signaling pathway
evm.model.Contig41.120	68.5825	68.6789	76.882	12.6379	15.4294	17.2689	109.211	66.5022	112.79	125.374	67.5487	141.009	245.992	250.129	240.452	PNP	PNPH_HUMAN	Purine nucleoside phosphorylase OS=Homo sapiens GN=PNP PE=1 SV=2	tr|A0A0L0CHI9|A0A0L0CHI9_LUCCU	Uncharacterized protein OS=Lucilia cuprina GN=FF38_07061 PE=4 SV=1	IPR011268:Purine nucleoside phosphorylase	GO:0004731	purine-nucleoside phosphorylase activity	path:ko00230,path:ko00240,path:ko00760	Purine metabolism|Pyrimidine metabolism|Nicotinate and nicotinamide metabolism
evm.model.Contig13.483	122.392	96.2563	100.849	140.854	158.576	132.592	229.199	250.132	312.145	326.969	262.646	328.885	225.732	274.155	240.107	Sod	SODC_CERCA	Superoxide dismutase [Cu-Zn] OS=Ceratitis capitata GN=Sod PE=3 SV=2	tr|A0A0L0BQ22|A0A0L0BQ22_LUCCU	Superoxide dismutase [Cu-Zn] OS=Lucilia cuprina GN=FF38_06203 PE=3 SV=1	IPR001424:Superoxide dismutase, copper/zinc binding domain	GO:0006801	superoxide metabolic process	path:ko04146,path:ko04213,path:ko05014,path:ko05016,path:ko05020	Peroxisome|Longevity regulating pathway - multiple species|Amyotrophic lateral sclerosis (ALS)|Huntington's disease|Prion diseases
evm.model.Contig7.310	332.439	345.953	327.555	231.703	274.874	196.727	145.907	131.845	147.53	383.142	327.87	274.322	257.301	239.988	240.005				tr|A0A0L0CGB7|A0A0L0CGB7_LUCCU	Uncharacterized protein OS=Lucilia cuprina GN=FF38_14319 PE=4 SV=1
evm.model.Contig117.60	112.998	105.816	106.143	93.3103	109.374	108.443	85.7347	86.5879	89.2895	218.615	113.991	185.269	241.438	280.518	239.49	Prosalpha4	PSA71_DROME	Proteasome subunit alpha type-7-1 OS=Drosophila melanogaster GN=Prosalpha4 PE=1 SV=2	tr|A0A0L0CMM8|A0A0L0CMM8_LUCCU	Proteasome subunit alpha type OS=Lucilia cuprina GN=FF38_02706 PE=3 SV=1	IPR000426:Proteasome alpha-subunit, N-terminal domain	GO:0004298	threonine-type endopeptidase activity	path:ko03050	Proteasome
evm.model.Contig23.234	62.5442	57.9037	57.7283	56.7203	58.2981	63.8467	59.3725	64.2052	71.7294	238.844	128.024	222.18	227.265	251.161	235.878	Rpn7	PSMD6_DROME	26S proteasome non-ATPase regulatory subunit 6 OS=Drosophila melanogaster GN=Rpn7 PE=2 SV=1	tr|A0A0L0CET0|A0A0L0CET0_LUCCU	26S proteasome non-ATPase regulatory subunit 6 OS=Lucilia cuprina GN=FF38_11762 PE=4 SV=1	IPR000717:Proteasome component (PCI) domain	GO:0005515	protein binding	path:ko03050,path:ko05169	Proteasome|Epstein-Barr virus infection
evm.model.Contig3.1164	79.8638	74.9336	72.0953	63.3173	82.9823	74.4407	59.7274	73.8141	69.553	164.478	95.4678	141.465	243.824	292.258	233.773	Rpn11	PSDE_DROME	26S proteasome non-ATPase regulatory subunit 14 OS=Drosophila melanogaster GN=Rpn11 PE=1 SV=1	tr|A0A0L0C8T7|A0A0L0C8T7_LUCCU	26S proteasome non-ATPase regulatory subunit 14 OS=Lucilia cuprina GN=FF38_09452 PE=4 SV=1	IPR000555:JAB1/MPN/MOV34 metalloenzyme domain	GO:0005515	protein binding	path:ko03050,path:ko05169	Proteasome|Epstein-Barr virus infection
evm.model.Contig4.326	67.1216	73.5047	83.9913	65.3167	76.8323	57.1308	69.8738	88.1973	83.2855	152.457	113.661	133.662	250.167	247.586	233.59	UBA1	UBA1_BOVIN	Ubiquitin-like modifier-activating enzyme 1 OS=Bos taurus GN=UBA1 PE=2 SV=1	tr|T1PE46|T1PE46_MUSDO	ThiF family protein OS=Musca domestica PE=2 SV=1	IPR032418:Ubiquitin-activating enzyme E1, FCCH domain	GO:0008641	small protein activating enzyme activity	path:ko04120,path:ko05012	Ubiquitin mediated proteolysis|Parkinson's disease
evm.model.Contig36.31	568.969	504.494	528.984	295.999	375.029	399.886	123.773	196.54	186.493	219.087	174.994	169.082	285.75	230.622	232.468	sumo3	SUMO3_XENTR	Small ubiquitin-related modifier 3 OS=Xenopus tropicalis GN=sumo3 PE=3 SV=1	tr|A0A0L0BZC2|A0A0L0BZC2_LUCCU	Small ubiquitin-related modifier OS=Lucilia cuprina GN=FF38_13706 PE=3 SV=1	IPR000626:Ubiquitin domain	GO:0016925	protein sumoylation	path:ko03013,path:ko05418	RNA transport|Fluid shear stress and atherosclerosis
evm.model.Contig13.131	169.67	125.63	152.81	123.963	114.073	99.935	437.669	364.068	457.381	491.592	210.355	432.286	244.155	224.048	231.914	CG12262	ACADM_DROME	Probable medium-chain specific acyl-CoA dehydrogenase, mitochondrial OS=Drosophila melanogaster GN=CG12262 PE=1 SV=1	tr|A0A0L0CHL3|A0A0L0CHL3_LUCCU	Putative medium-chain specific acyl-CoA dehydrogenase, mitochondrial OS=Lucilia cuprina GN=FF38_06098 PE=3 SV=1	IPR009075:Acyl-CoA dehydrogenase/oxidase C-terminal	GO:0016627	oxidoreductase activity, acting on the CH-CH group of donors
evm.model.Contig1.832	7.76327	7.22407	5.10199	4.43804	4.21999	3.24914	40.2527	23.8778	56.2013	57.2756	34.8534	74.4808	192.4	281.947	231.132				tr|A0A0L0BTJ5|A0A0L0BTJ5_LUCCU	Uncharacterized protein OS=Lucilia cuprina GN=FF38_09491 PE=4 SV=1
evm.model.Contig55.74	41.8332	40.5588	41.1945	46.1422	51.8186	49.6627	56.0012	68.0302	77.0134	169.11	106.917	147.003	230.217	277.572	230.736	DppIII	DPP3_DROME	Dipeptidyl peptidase 3 OS=Drosophila melanogaster GN=DppIII PE=2 SV=2	tr|A0A1I8NZT2|A0A1I8NZT2_STOCA	Uncharacterized protein OS=Stomoxys calcitrans GN=106088087 PE=4 SV=1
evm.model.Contig70.60	516.108	433.575	484.679	172.227	182.422	173.256	639.485	940.723	721.298	425.498	252.461	401.705	188.007	203.777	229.305				tr|A0A0L0CJQ4|A0A0L0CJQ4_LUCCU	Uncharacterized protein OS=Lucilia cuprina GN=FF38_00501 PE=4 SV=1	IPR013201:Cathepsin propeptide inhibitor domain (I29)
evm.model.Contig44.153	79.1911	72.4904	73.7622	93.9471	115.229	114.398	75.0746	85.1805	85.735	194.062	114.289	178.551	256.777	304.945	229.21	Prosbeta3	PSB3_DROME	Proteasome subunit beta type-3 OS=Drosophila melanogaster GN=Prosbeta3 PE=1 SV=1	tr|A0A0L0BUQ8|A0A0L0BUQ8_LUCCU	Proteasome subunit beta type OS=Lucilia cuprina GN=FF38_01195 PE=3 SV=1	IPR023333:Proteasome B-type subunit	GO:0019774	proteasome core complex, beta-subunit complex	path:ko03050	Proteasome
evm.model.Contig69.59	0.827743	0	0	0	0.158621	0.316204	0.159677	0	0	0.473832	0	0.168365	655.178	706.16	228.572				tr|A0A0L0BUA9|A0A0L0BUA9_LUCCU	Uncharacterized protein OS=Lucilia cuprina GN=FF38_00967 PE=4 SV=1
evm.model.Contig6.608	119.391	95.8136	127.512	59.9117	56.1108	45.3345	71.203	109.426	86.844	73.9328	41.7884	47.4201	162.338	153.155	226.707	SLC16A14	MOT14_HUMAN	Monocarboxylate transporter 14 OS=Homo sapiens GN=SLC16A14 PE=2 SV=1	tr|A0A0L0CB43|A0A0L0CB43_LUCCU	Uncharacterized protein OS=Lucilia cuprina GN=FF38_08658 PE=4 SV=1	IPR011701:Major facilitator superfamily	GO:0016021	integral component of membrane
evm.model.Contig14.280	15.301	16.45	14.8172	20.4449	28.5121	12.7867	42.4436	14.8842	35.2903	285.753	173.663	221.465	389.972	124.203	225.316
evm.model.Contig6.363	12.5427	7.80046	9.70953	4.80522	6.63685	2.08643	100.96	41.2526	38.8376	565.468	98.1369	462.367	171.255	330.885	224.783
evm.model.Contig38.108	99.5249	88.3702	89.9299	88.7172	102.936	114.867	72.6199	84.6752	85.7511	198.875	110.74	163.524	242.75	267.718	223.68	Prosalpha3	PSA4_DROME	Proteasome subunit alpha type-4 OS=Drosophila melanogaster GN=Prosalpha3 PE=1 SV=2	tr|A0A1L8EC72|A0A1L8EC72_HAEIR	Proteasome subunit alpha type OS=Haematobia irritans PE=3 SV=1	IPR034647:Proteasome subunit alpha4	GO:0019773	proteasome core complex, alpha-subunit complex	path:ko03050	Proteasome
evm.model.Contig10.385	0.217791	0.809617	0.197823	0	0	0	0.211222	0	1.01653	1.43089	9.87641	1.09637	157.151	155.817	223.617				tr|A0A0L0C206|A0A0L0C206_LUCCU	Uncharacterized protein OS=Lucilia cuprina GN=FF38_00861 PE=4 SV=1
evm.model.Contig12.187	3.59436	2.80932	3.41956	14.6616	6.56256	10.8728	61.4258	105.08	69.8604	1011.09	480.705	845.064	246.475	273.762	223.108	LCP22	CUD1_SCHGR	Endocuticle structural glycoprotein SgAbd-1 OS=Schistocerca gregaria PE=1 SV=1	tr|A0A0L0CAJ7|A0A0L0CAJ7_LUCCU	Uncharacterized protein OS=Lucilia cuprina GN=FF38_02450 PE=4 SV=1	IPR000618:Insect cuticle protein	GO:0042302	structural constituent of cuticle
evm.model.Contig104.1	12.221	6.99198	12.3184	60.079	86.2808	37.5456	80.7674	69.111	52.0919	28.8888	48.5338	24.6255	185.848	209.425	222.596	ESR16	ES16_MANSE	Ecdysteroid-regulated 16 kDa protein OS=Manduca sexta GN=ESR16 PE=2 SV=1	tr|A0A0L0C9V5|A0A0L0C9V5_LUCCU	Uncharacterized protein OS=Lucilia cuprina GN=FF38_14113 PE=4 SV=1	IPR033916:ML domain, Npc2 like	GO:0032367	intracellular cholesterol transport
evm.model.Contig6.296	86.0223	83.285	90.8009	84.8965	92.425	101.254	75.6485	75.9537	80.8812	226.353	129.745	197.6	231.866	263.66	221.752	Prosalpha5	PSA5_DROME	Proteasome subunit alpha type-5 OS=Drosophila melanogaster GN=Prosalpha5 PE=2 SV=2	tr|A0A0L0C1G7|A0A0L0C1G7_LUCCU	Proteasome subunit alpha type OS=Lucilia cuprina GN=FF38_12234 PE=3 SV=1	IPR000426:Proteasome alpha-subunit, N-terminal domain	GO:0004175	endopeptidase activity	path:ko03050	Proteasome
evm.model.Contig181.9	1085.79	938.63	923.212	1106.18	1161.85	970.818	1307.99	1312.95	1305.23	390.492	607.168	370.465	281.239	255.704	221.148	ATPsynO	ATPO_DROME	ATP synthase subunit O, mitochondrial OS=Drosophila melanogaster GN=ATPsynO PE=2 SV=2	tr|A0A0L0C9M4|A0A0L0C9M4_LUCCU	ATP synthase subunit O, mitochondrial OS=Lucilia cuprina GN=FF38_04398 PE=3 SV=1	IPR000711:ATPase, OSCP/delta subunit	GO:0015986	ATP synthesis coupled proton transport	path:ko00190,path:ko04714,path:ko05010,path:ko05012,path:ko05016	Oxidative phosphorylation|Thermogenesis|Alzheimer's disease|Parkinson's disease|Huntington's disease
evm.model.Contig88.44	90.1498	76.695	74.2336	59.5618	66.5944	71.352	71.8176	81.3297	84.0598	179.128	98.7981	171.923	229.568	232.51	219.503	Clc	CLC_DROME	Clathrin light chain OS=Drosophila melanogaster GN=Clc PE=2 SV=1	tr|A0A0L0BPX9|A0A0L0BPX9_LUCCU	Clathrin light chain OS=Lucilia cuprina GN=FF38_00674 PE=3 SV=1	IPR000996:Clathrin light chain	GO:0005198	structural molecule activity
evm.model.Contig2.786	0.59649	0.563728	0.690259	0.646128	0.45164	0.836952	0.762374	0.578321	1.18762	18.3374	25.2923	32.885	120.823	77.4989	218.445	Hsp68	HSP68_DROME	Heat shock protein 68 OS=Drosophila melanogaster GN=Hsp68 PE=1 SV=1	tr|A0A034V9V9|A0A034V9V9_BACDO	Heat shock protein 68 OS=Bactrocera dorsalis GN=HSP68 PE=3 SV=1	IPR013126:Heat shock protein 70 family			path:ko03040,path:ko04010,path:ko04141,path:ko04144,path:ko04213,path:ko04612,path:ko04915,path:ko05134,path:ko05145,path:ko05162,path:ko05164,path:ko05169	Spliceosome|MAPK signaling pathway|Protein processing in endoplasmic reticulum|Endocytosis|Longevity regulating pathway - multiple species|Antigen processing and presentation|Estrogen signaling pathway|Legionellosis|Toxoplasmosis|Measles|Influenza A|Epstein-Barr virus infection
evm.model.Contig7.314	8.38273	12.293	9.52389	48.2539	15.6109	68.9249	98.2032	60.1184	92.0266	27.8445	35.0253	10.0762	378.822	379.873	218.157	SNX20	SBPI_NEOBL	Protease inhibitor OS=Neobellieria bullata PE=1 SV=1	tr|A0A0L0CFH8|A0A0L0CFH8_LUCCU	Uncharacterized protein OS=Lucilia cuprina GN=FF38_14330 PE=4 SV=1	IPR002223:Pancreatic trypsin inhibitor Kunitz domain	GO:0004867	serine-type endopeptidase inhibitor activity
evm.model.Contig72.65	0	0	0.0585469	0.0763424	0.0747646	0	0.144523	0.0717745	0	0.0680677	0	0.144105	152.782	89.5318	216.946	Wdr78	LECA_SARPE	Lectin subunit alpha OS=Sarcophaga peregrina PE=1 SV=1	tr|A0A0L0C481|A0A0L0C481_LUCCU	Uncharacterized protein OS=Lucilia cuprina GN=FF38_01135 PE=4 SV=1	IPR001304:C-type lectin-like
evm.model.Contig23.282	59.7228	56.6951	50.9273	52.3861	54.4136	51.2251	54.948	57.8925	51.5753	149.129	78.8694	160.792	189.507	175.835	216.04	SNX12	SNX12_HUMAN	Sorting nexin-12 OS=Homo sapiens GN=SNX12 PE=1 SV=3	tr|A0A0L0CGE8|A0A0L0CGE8_LUCCU	Uncharacterized protein OS=Lucilia cuprina GN=FF38_08423 PE=4 SV=1	IPR001683:Phox homologous domain	GO:0035091	phosphatidylinositol binding	path:ko04144	Endocytosis
evm.model.Contig10.129	41.5484	32.8379	34.6284	23.5085	18.4695	21.4123	26.1696	32.173	31.263	29.7008	23.1943	25.7625	259.535	224.036	215.315	CG14621	S35E1_DROME	Solute carrier family 35 member E1 homolog OS=Drosophila melanogaster GN=CG14621 PE=2 SV=1	tr|A0A0L0C7Z7|A0A0L0C7Z7_LUCCU	Putative solute carrier family 35 member E1 OS=Lucilia cuprina GN=FF38_01383 PE=4 SV=1	IPR004853:Sugar phosphate transporter domain
evm.model.Contig16.366	78.3017	65.9191	63.3018	101.48	124.959	131.172	86.838	100.633	91.9115	183.669	121.188	168.509	231.448	252.22	215.045	Prosbeta6	PSB1_DROME	Proteasome subunit beta type-1 OS=Drosophila melanogaster GN=Prosbeta6 PE=2 SV=2	tr|A0A0L0BUP5|A0A0L0BUP5_LUCCU	Proteasome subunit beta type-1 OS=Lucilia cuprina GN=FF38_02876 PE=4 SV=1	IPR023333:Proteasome B-type subunit	GO:0004298	threonine-type endopeptidase activity	path:ko03050	Proteasome
evm.model.Contig30.59	223.731	181.651	193.634	258.682	233.93	199.699	320.035	323.801	337.407	350.313	198.913	274.129	215.261	186.228	213.669	Scsalpha	SUCA_DROME	Succinyl-CoA ligase [ADP/GDP-forming] subunit alpha, mitochondrial OS=Drosophila melanogaster GN=Scsalpha PE=2 SV=3	tr|A0A0L0BQF0|A0A0L0BQF0_LUCCU	Succinate--CoA ligase [ADP/GDP-forming] subunit alpha, mitochondrial OS=Lucilia cuprina GN=FF38_07311 PE=3 SV=1	IPR003781:CoA-binding	GO:0003824	catalytic activity	path:ko00020,path:ko00640	Citrate cycle (TCA cycle)|Propanoate metabolism
evm.model.Contig73.66	120.684	147.331	133.414	77.9877	72.8749	61.8886	25.2159	9.70983	20.045	202.31	190.358	103.946	208.48	197.683	213.503	HmgD	HMGD_DROME	High mobility group protein D OS=Drosophila melanogaster GN=HmgD PE=1 SV=1	tr|A0A0L0CCA9|A0A0L0CCA9_LUCCU	Uncharacterized protein OS=Lucilia cuprina GN=FF38_13399 PE=4 SV=1	IPR009071:High mobility group box domain
evm.model.Contig23.57	5.33784	6.11124	7.02803	5.15024	4.94645	4.9721	3.84192	4.897	4.48495	10.8877	4.97573	10.323	205.629	173.461	213.442	Mical	MICAL_DROME	Protein-methionine sulfoxide oxidase Mical OS=Drosophila melanogaster GN=Mical PE=1 SV=1	tr|A0A1I8PQX2|A0A1I8PQX2_STOCA	Uncharacterized protein OS=Stomoxys calcitrans GN=106080531 PE=4 SV=1	IPR001715:Calponin homology domain	GO:0005515	protein binding
evm.model.Contig13.415	25.4627	31.9618	27.4029	24.725	14.8656	15.8329	4.41077	1.68686	1.82612	69.0319	42.4296	41.1159	207.783	224.633	213.01	fax	FAXC_DROME	Failed axon connections OS=Drosophila melanogaster GN=fax PE=1 SV=1	tr|A0A0L0CAK8|A0A0L0CAK8_LUCCU	Failed axon connections OS=Lucilia cuprina GN=FF38_08476 PE=4 SV=1	IPR026928:Failed axon connections
evm.model.Contig1.636	13.4014	9.20942	9.88885	7.07763	9.11071	5.71413	9.67358	17.2452	10.7653	561.387	100.256	555.547	184.965	176.839	212.274	Cyt-b5-r	CYB5R_DROME	Cytochrome b5-related protein OS=Drosophila melanogaster GN=Cyt-b5-r PE=2 SV=2	tr|A0A0L0CR60|A0A0L0CR60_LUCCU	Cytochrome b5-related protein OS=Lucilia cuprina GN=FF38_02229 PE=3 SV=1	IPR005804:Fatty acid desaturase domain	GO:0006629	lipid metabolic process
evm.model.Contig16.152	236.551	281.296	291.873	100.128	135.039	118.608	132.738	318.302	311.423	144.565	85.742	111.903	235.985	223.818	211.228	snd1	SND1_DANRE	Staphylococcal nuclease domain-containing protein 1 OS=Danio rerio GN=snd1 PE=2 SV=1	tr|A0A0L0BWN2|A0A0L0BWN2_LUCCU	Uncharacterized protein OS=Lucilia cuprina GN=FF38_04264 PE=4 SV=1	IPR002999:Tudor domain			path:ko05169,path:ko05203	Epstein-Barr virus infection|Viral carcinogenesis
evm.model.Contig6.527	1142.43	1139.89	1224.61	415.288	517.702	428.098	379.643	354.421	294.099	248.345	159.506	199.802	213.058	208.572	210.618	Nap1l4	NP1L4_MOUSE	Nucleosome assembly protein 1-like 4 OS=Mus musculus GN=Nap1l4 PE=1 SV=1	tr|A0A0L0CBM7|A0A0L0CBM7_LUCCU	Uncharacterized protein OS=Lucilia cuprina GN=FF38_08438 PE=3 SV=1	IPR002164:Nucleosome assembly protein (NAP)	GO:0005634	nucleus
evm.model.Contig3.929	76.3273	72.52	75.8526	48.3107	44.3388	37.1771	72.2631	81.0102	76.8313	222.034	107.152	198.18	212.105	207.846	207.707	RAB5B	RAB5B_CHICK	Ras-related protein Rab-5B OS=Gallus gallus GN=RAB5B PE=2 SV=1	tr|A0A0L0CCQ3|A0A0L0CCQ3_LUCCU	Uncharacterized protein OS=Lucilia cuprina GN=FF38_05511 PE=4 SV=1	IPR001806:Small GTPase superfamily	GO:0003924	GTPase activity	path:ko04014,path:ko04144,path:ko04145,path:ko04962,path:ko05146,path:ko05152	Ras signaling pathway|Endocytosis|Phagosome|Vasopressin-regulated water reabsorption|Amoebiasis|Tuberculosis
evm.model.Contig14.171	64.9829	59.598	65.6612	66.4178	74.4584	84.3091	58.6973	67.4399	71.8517	105.227	67.1495	111.077	192.225	201.583	207.287	Roc1a	RBX1A_DROME	RING-box protein 1A OS=Drosophila melanogaster GN=Roc1a PE=1 SV=1	tr|A0A1L8EAM6|A0A1L8EAM6_HAEIR	Putative scf ubiquitin ligase rbx1 component (Fragment) OS=Haematobia irritans PE=4 SV=1	IPR001841:Zinc finger, RING-type	GO:0008270	zinc ion binding	path:ko03420,path:ko04066,path:ko04110,path:ko04111,path:ko04114,path:ko04120,path:ko04141,path:ko04310,path:ko04341,path:ko04350,path:ko04710,path:ko05200,path:ko05211	Nucleotide excision repair|HIF-1 signaling pathway|Cell cycle|Cell cycle - yeast|Oocyte meiosis|Ubiquitin mediated proteolysis|Protein processing in endoplasmic reticulum|Wnt signaling pathway|Hedgehog signaling pathway - fly|TGF-beta signaling pathway|Circadian rhythm|Pathways in cancer|Renal cell carcinoma
evm.model.Contig153.10	132.867	75.3177	98.6129	17.4389	45.4672	25.8183	407.737	424.302	507.835	373.201	249.156	398.327	103.917	162.026	207.186	cahz	CAHZ_DANRE	Carbonic anhydrase OS=Danio rerio GN=cahz PE=1 SV=2	tr|A0A0L0BQQ2|A0A0L0BQQ2_LUCCU	Uncharacterized protein OS=Lucilia cuprina GN=FF38_07300 PE=4 SV=1	IPR023561:Carbonic anhydrase, alpha-class
evm.model.Contig37.137	28.9079	25.2396	30.5746	16.5685	16.0151	12.3864	32.6933	35.5759	25.2464	28.0265	19.1009	31.1275	217.727	184.885	206.395	nt5c2	5NTC_XENTR	Cytosolic purine 5'-nucleotidase OS=Xenopus tropicalis GN=nt5c2 PE=2 SV=1	tr|A0A0L0C0R1|A0A0L0C0R1_LUCCU	Uncharacterized protein OS=Lucilia cuprina GN=FF38_08126 PE=4 SV=1	IPR008380:HAD-superfamily hydrolase, subfamily IG, 5'-nucleotidase			path:ko00230,path:ko00240,path:ko00760	Purine metabolism|Pyrimidine metabolism|Nicotinate and nicotinamide metabolism
evm.model.Contig3.1153	535.238	508.136	534.08	224.944	241.045	229.732	186.502	218.596	199.803	192.169	153.599	160.845	208.918	213.53	206.296	eIF-3p40	EIF3H_DROAN	Eukaryotic translation initiation factor 3 subunit H OS=Drosophila ananassae GN=eIF-3p40 PE=3 SV=1	tr|A0A0L0CD09|A0A0L0CD09_LUCCU	Eukaryotic translation initiation factor 3 subunit H OS=Lucilia cuprina GN=FF38_03935 PE=3 SV=1	IPR000555:JAB1/MPN/MOV34 metalloenzyme domain	GO:0003743	translation initiation factor activity	path:ko03013,path:ko05162	RNA transport|Measles
evm.model.Contig6.811	87.9402	84.9307	85.0697	96.7728	113.486	115.279	79.4276	79.0476	83.8751	196.986	112.368	158.813	225.289	252.29	206.161	Prosalpha1	PSA6_DROME	Proteasome subunit alpha type-6 OS=Drosophila melanogaster GN=Prosalpha1 PE=1 SV=2	tr|A0A0L0BRM4|A0A0L0BRM4_LUCCU	Proteasome subunit alpha type OS=Lucilia cuprina GN=FF38_03181 PE=3 SV=1	IPR000426:Proteasome alpha-subunit, N-terminal domain	GO:0004175	endopeptidase activity	path:ko03050	Proteasome
evm.model.Contig1.160	739.84	747.819	643.771	936.751	1033.02	942.029	924.085	874.152	851.49	318.154	502.162	249.82	241.614	218.025	205.922	ATP5L	ATP5L_PONAB	ATP synthase subunit g, mitochondrial OS=Pongo abelii GN=ATP5L PE=3 SV=1	tr|A0A1L8EI22|A0A1L8EI22_HAEIR	Putative atp synthase subunit g mitochondrial OS=Haematobia irritans PE=4 SV=1	IPR006808:ATP synthase, F0 complex, subunit G, mitochondrial	GO:0000276	mitochondrial proton-transporting ATP synthase complex, coupling factor F(o)	path:ko00190,path:ko04714	Oxidative phosphorylation|Thermogenesis
evm.model.Contig86.86	4.21739	6.2269	3.88671	14.5848	6.5037	10.1438	13.1414	11.982	17.7117	626.55	207.977	634.934	96.8644	84.7617	205.467	CG6762	SRX_DROME	Putative sulfiredoxin OS=Drosophila melanogaster GN=CG6762 PE=1 SV=1	tr|A0A0L0BUL0|A0A0L0BUL0_LUCCU	Sulfiredoxin OS=Lucilia cuprina GN=FF38_08788 PE=3 SV=1	IPR003115:ParB/Sulfiredoxin	GO:0032542	sulfiredoxin activity
evm.model.Contig65.113	0.0713469	0	0.198384	0.177787	0.322794	0.203038	0.140842	0	0	90.1681	18.2879	61.7527	317.376	297.734	204.344	TNXB	TENX_HUMAN	Tenascin-X OS=Homo sapiens GN=TNXB PE=1 SV=4	tr|Q9NL50|Q9NL50_SARPE	120-kDa protein OS=Sarcophaga peregrina PE=2 SV=1	IPR003341:Cysteine rich repeat, tripleX
evm.model.Contig28.6	50.5645	52.4929	48.4068	50.1932	58.4748	56.546	50.6246	55.2024	55.135	134.927	75.2823	127.831	223.736	208.225	202.685	Rpn10	PSMD4_DROME	26S proteasome non-ATPase regulatory subunit 4 OS=Drosophila melanogaster GN=Rpn10 PE=1 SV=2	tr|A0A0L0CJR9|A0A0L0CJR9_LUCCU	26S proteasome non-ATPase regulatory subunit 4 OS=Lucilia cuprina GN=FF38_13186 PE=4 SV=1	IPR027040:Proteasome subunit Rpn10	GO:0006511	ubiquitin-dependent protein catabolic process	path:ko03050,path:ko05169	Proteasome|Epstein-Barr virus infection
evm.model.Contig67.114	13.5366	10.3589	10.4317	15.1179	13.8416	7.33383	56.1056	60.563	54.9079	250.29	32.4167	274.1	271.192	212.557	202.13	cybrd1	CYBR1_DANRE	Cytochrome b reductase 1 OS=Danio rerio GN=cybrd1 PE=2 SV=1	tr|A0A0L0CEX9|A0A0L0CEX9_LUCCU	Uncharacterized protein OS=Lucilia cuprina GN=FF38_01071 PE=4 SV=1	IPR006593:Cytochrome b561/ferric reductase transmembrane
evm.model.Contig137.26	462.432	313.988	429.986	95.6776	97.1439	172.995	657.275	1311.25	995.073	227.329	349.429	580.172	61.0001	301.178	201.765	Dbi	ACBP_DROME	Acyl-CoA-binding protein homolog OS=Drosophila melanogaster GN=Dbi PE=2 SV=1	tr|A0A0L0CCA2|A0A0L0CCA2_LUCCU	Putative acyl-CoA-binding protein OS=Lucilia cuprina GN=FF38_13495 PE=4 SV=1	IPR000582:Acyl-CoA-binding protein, ACBP	GO:0000062	fatty-acyl-CoA binding
evm.model.Contig52.184	88.9144	91.3656	90.5409	81.258	93.341	93.1902	76.1425	78.0941	83.0531	218.785	122.455	177.885	217.335	251.403	201.45	Prosalpha6	PSA1_DROME	Proteasome subunit alpha type-1 OS=Drosophila melanogaster GN=Prosalpha6 PE=1 SV=1	tr|A0A0L0CBK3|A0A0L0CBK3_LUCCU	Proteasome subunit alpha type OS=Lucilia cuprina GN=FF38_02578 PE=3 SV=1	IPR000426:Proteasome alpha-subunit, N-terminal domain	GO:0019773	proteasome core complex, alpha-subunit complex	path:ko03050	Proteasome
evm.model.Contig1.587	1.39386	1.92005	1.88705	1.16449	1.97541	1.62179	1.19497	1.13778	1.41605	3.53815	1.92656	3.62713	328.576	313.205	201.275	LRR1	LLR1_HUMAN	Leucine-rich repeat protein 1 OS=Homo sapiens GN=LRR1 PE=1 SV=2	tr|A0A0L0C8R2|A0A0L0C8R2_LUCCU	Uncharacterized protein OS=Lucilia cuprina GN=FF38_07991 PE=4 SV=1	IPR003591:Leucine-rich repeat, typical subtype	GO:0005515	protein binding
evm.model.Contig27.143	367.817	411.675	423.028	222.045	259.991	223.392	71.5862	114.964	97.9169	162.295	109.392	140.341	210.88	191.62	200.445	Pep	PEP_DROME	Zinc finger protein on ecdysone puffs OS=Drosophila melanogaster GN=Pep PE=1 SV=1	tr|Q9BLH7|Q9BLH7_SARPE	Cathepsin B mRNA 3'-untranslated-region-binding protein CBBP OS=Sarcophaga peregrina PE=2 SV=1	IPR013087:Zinc finger C2H2-type	GO:0003676	nucleic acid binding
evm.model.Contig13.494	1228.78	1147.93	1256.01	793.264	814.636	714.629	996.519	1116.55	987.427	345.793	498.315	289.814	222.25	198.158	198	Slc25a3	MPCP_MOUSE	Phosphate carrier protein, mitochondrial OS=Mus musculus GN=Slc25a3 PE=1 SV=1	tr|A0A0L0CHM5|A0A0L0CHM5_LUCCU	Uncharacterized protein OS=Lucilia cuprina GN=FF38_10640 PE=3 SV=1	IPR018108:Mitochondrial substrate/solute carrier
evm.model.Contig25.31	534.453	588.695	650.104	173.472	211.214	159.965	492.752	693.454	494.596	99.4051	120.603	70.2548	181.776	216.193	197.911	Sam-S	METK_DROME	S-adenosylmethionine synthase OS=Drosophila melanogaster GN=Sam-S PE=2 SV=2	tr|A0A0L0BLR5|A0A0L0BLR5_LUCCU	S-adenosylmethionine synthase OS=Lucilia cuprina GN=FF38_09019 PE=3 SV=1	IPR002133:S-adenosylmethionine synthetase	GO:0004478	methionine adenosyltransferase activity	path:ko00270	Cysteine and methionine metabolism
evm.model.Contig83.30	6.96732	8.00122	5.37857	8.33255	8.55971	6.5687	15.8005	19.7494	18.9893	3.25441	7.72779	3.96693	226.533	212.548	196.844	LCT	LPH_HUMAN	Lactase-phlorizin hydrolase OS=Homo sapiens GN=LCT PE=1 SV=3	tr|T1PC49|T1PC49_MUSDO	Glycosyl hydrolase OS=Musca domestica PE=2 SV=1	IPR001360:Glycoside hydrolase family 1	GO:0004553	hydrolase activity, hydrolyzing O-glycosyl compounds
evm.model.Contig109.44	57.4303	54.6626	54.3921	55.6826	57.9548	58.3659	50.1638	61.2583	56.3458	143.085	89.9715	133.004	229.419	248.844	194.143	Psmc2	PRS7_MOUSE	26S protease regulatory subunit 7 OS=Mus musculus GN=Psmc2 PE=1 SV=5	tr|A0A0L0BKI7|A0A0L0BKI7_LUCCU	Uncharacterized protein OS=Lucilia cuprina GN=FF38_00411 PE=3 SV=1	IPR003959:ATPase, AAA-type, core	GO:0005524	ATP binding	path:ko03050,path:ko05169	Proteasome|Epstein-Barr virus infection
evm.model.Contig11.241	798.964	746.71	719.516	450.937	483.158	491.175	352.107	341.773	325.378	178.712	130.181	160.481	209.328	185.837	194.03	IPP	IPP_HUMAN	Actin-binding protein IPP OS=Homo sapiens GN=IPP PE=2 SV=1	tr|A0A1I8NLZ9|A0A1I8NLZ9_STOCA	Uncharacterized protein OS=Stomoxys calcitrans GN=106082080 PE=4 SV=1	IPR013087:Zinc finger C2H2-type	GO:0005515	protein binding
evm.model.Contig116.65	709.444	637.482	729.509	488.073	472.087	343.543	812.748	878.524	853.278	293.86	521.016	219.084	162.866	133.143	193.729	GPN1	CISY_GLOMM	Probable citrate synthase, mitochondrial OS=Glossina morsitans morsitans PE=2 SV=1	tr|A0A1L8EE92|A0A1L8EE92_HAEIR	Citrate synthase OS=Haematobia irritans PE=3 SV=1	IPR002020:Citrate synthase	GO:0046912	transferase activity, transferring acyl groups, acyl groups converted into alkyl on transfer	path:ko00020,path:ko00630	Citrate cycle (TCA cycle)|Glyoxylate and dicarboxylate metabolism
evm.model.Contig14.233	500.606	542.709	527.571	391.55	462.848	386.982	318.13	314.475	298.714	167.463	135.764	163.215	198.625	174.03	193.141	RpL22	RL22_DROME	60S ribosomal protein L22 OS=Drosophila melanogaster GN=RpL22 PE=1 SV=2	tr|A0A0L0C258|A0A0L0C258_LUCCU	60S ribosomal protein L22 OS=Lucilia cuprina GN=FF38_01795 PE=4 SV=1	IPR002671:Ribosomal protein L22e	GO:0003735	structural constituent of ribosome	path:ko03010	Ribosome
evm.model.Contig98.16	1076.41	881.079	853.324	1051.44	1126.43	968.555	1027.96	1029.01	973.592	392.224	668.944	299.997	233.444	215.844	193.027	COX4I1	COX41_PITPI	Cytochrome c oxidase subunit 4 isoform 1, mitochondrial (Fragment) OS=Pithecia pithecia GN=COX4I1 PE=3 SV=1	tr|A0A0L0CDV8|A0A0L0CDV8_LUCCU	Uncharacterized protein (Fragment) OS=Lucilia cuprina GN=FF38_07465 PE=4 SV=1	IPR013288:Cytochrome c oxidase subunit IV	GO:0004129	cytochrome-c oxidase activity	path:ko00190,path:ko04260,path:ko04714,path:ko04932,path:ko05010,path:ko05012,path:ko05016	Oxidative phosphorylation|Cardiac muscle contraction|Thermogenesis|Non-alcoholic fatty liver disease (NAFLD)|Alzheimer's disease|Parkinson's disease|Huntington's disease
evm.model.Contig49.203	147.91	136.746	126.435	84.5111	92.1782	100.617	87.8908	79.8599	86.3502	190.987	101.289	178.02	207.295	190.767	192.551	Arf102F	ARF2_DROME	ADP-ribosylation factor 2 OS=Drosophila melanogaster GN=Arf102F PE=2 SV=2	tr|A0A0L0C9F7|A0A0L0C9F7_LUCCU	ADP-ribosylation factor 2 OS=Lucilia cuprina GN=FF38_06264 PE=3 SV=1	IPR006689:Small GTPase superfamily, ARF/SAR type	GO:0005525	GTP binding
evm.model.Contig36.180	81.5405	67.608	70.4875	65.7236	77.7503	91.1799	47.9863	66.6196	54.8939	160.307	83.8278	147.909	212.691	265.234	191.275	PSMD8	PSMD8_PONAB	26S proteasome non-ATPase regulatory subunit 8 (Fragment) OS=Pongo abelii GN=PSMD8 PE=2 SV=2	tr|A0A0L0C3J3|A0A0L0C3J3_LUCCU	Uncharacterized protein OS=Lucilia cuprina GN=FF38_10932 PE=4 SV=1	IPR006746:26S proteasome non-ATPase regulatory subunit Rpn12	GO:0005838	proteasome regulatory particle	path:ko03050,path:ko05169	Proteasome|Epstein-Barr virus infection
evm.model.Contig6.700	38.8338	31.4997	25.0752	87.9594	60.5215	81.5028	169.423	157.503	226.314	549.381	534.187	543.273	183.952	178.682	190.932				tr|A0A0L0CML6|A0A0L0CML6_LUCCU	Uncharacterized protein OS=Lucilia cuprina GN=FF38_03859 PE=4 SV=1
evm.model.Contig109.46	56.2255	78.6837	84.4249	30.5605	21.8971	16.8993	56.9363	42.6273	46.3037	52.3038	19.2024	54.7028	191.234	198.151	190.614	larp	LARP_DROME	La-related protein 1 OS=Drosophila melanogaster GN=larp PE=1 SV=5	tr|A0A0L0CFI2|A0A0L0CFI2_LUCCU	La-related protein (Fragment) OS=Lucilia cuprina GN=FF38_01240 PE=4 SV=1	IPR006607:Protein of unknown function DM15
evm.model.Contig31.262	6.23105	7.8273	6.3305	2.39584	4.59569	3.91873	27.9003	32.2969	34.6363	261.44	128.33	286.286	150.892	195.374	190.263				tr|A0A0L0CNQ4|A0A0L0CNQ4_LUCCU	Uncharacterized protein OS=Lucilia cuprina GN=FF38_04275 PE=4 SV=1	IPR029277:Single domain Von Willebrand factor type C domain
evm.model.Contig7.59	6.93346	6.7809	4.97625	7.68856	5.70898	3.96908	4.22647	3.74339	5.05924	18.7065	9.91234	17.0667	199.797	177.944	189.187	TMEM230	TM230_HUMAN	Transmembrane protein 230 OS=Homo sapiens GN=TMEM230 PE=1 SV=1	tr|A0A0L0CB84|A0A0L0CB84_LUCCU	Uncharacterized protein OS=Lucilia cuprina GN=FF38_09460 PE=4 SV=1	IPR008590:Protein of unknown function DUF872, transmembrane
evm.model.Contig93.115	417.802	397.451	500.555	130.843	168.017	131.04	104.672	147.078	114.606	206.268	146.497	194.042	175.425	184.805	188.832	DNAJA1	DNJA1_HUMAN	DnaJ homolog subfamily A member 1 OS=Homo sapiens GN=DNAJA1 PE=1 SV=2	tr|A0A0L0CGJ4|A0A0L0CGJ4_LUCCU	Uncharacterized protein OS=Lucilia cuprina GN=FF38_12743 PE=3 SV=1	IPR002939:Chaperone DnaJ, C-terminal	GO:0031072	heat shock protein binding	path:ko04141	Protein processing in endoplasmic reticulum
evm.model.Contig7.46	75.2513	80.973	78.3058	84.4001	95.351	99.4029	65.9675	71.4769	77.9829	165.992	101.776	146.147	186.617	223.113	188.716	Prosbeta4R2	PSB2_DROME	Probable proteasome subunit beta type-2 OS=Drosophila melanogaster GN=Prosbeta4R2 PE=2 SV=3	tr|A0A0L0C8Y5|A0A0L0C8Y5_LUCCU	Putative proteasome subunit beta type-2 OS=Lucilia cuprina GN=FF38_09466 PE=4 SV=1	IPR035206:Proteasome subunit beta 2	GO:0004298	threonine-type endopeptidase activity	path:ko03050	Proteasome
evm.model.Contig181.10	94.5027	91.4674	96.0955	74.9324	88.1956	80.5489	43.1379	48.0461	49.4775	159.625	120.131	129.106	181.055	199.678	187.947	Set	SET_DROME	Protein SET OS=Drosophila melanogaster GN=Set PE=1 SV=2	tr|A0A0L0C9L8|A0A0L0C9L8_LUCCU	Protein SET OS=Lucilia cuprina GN=FF38_04396 PE=3 SV=1	IPR002164:Nucleosome assembly protein (NAP)	GO:0005634	nucleus
evm.model.Contig72.64	0.17743	0.11119	0	0.80336	0.74173	0.15088	5.05688	5.01814	2.90383	12.4894	6.35525	12.2986	153.975	102.359	187.848	Wdr78	LECA_SARPE	Lectin subunit alpha OS=Sarcophaga peregrina PE=1 SV=1	tr|A0A0L0C481|A0A0L0C481_LUCCU	Uncharacterized protein OS=Lucilia cuprina GN=FF38_01135 PE=4 SV=1	IPR001304:C-type lectin-like
evm.model.Contig17.175	880.476	721.999	742.302	972.636	1039.54	925.318	1004.26	1113.07	972.92	306.074	540.252	258.402	232.244	227.219	187.085	CG4692	ATPK_DROME	Putative ATP synthase subunit f, mitochondrial OS=Drosophila melanogaster GN=CG4692 PE=1 SV=1	tr|A0A0L0C0Z6|A0A0L0C0Z6_LUCCU	Putative ATP synthase subunit f, mitochondrial OS=Lucilia cuprina GN=FF38_08326 PE=4 SV=1	IPR019344:Mitochondrial F1-F0 ATP synthase subunit F, predicted			path:ko00190,path:ko04714	Oxidative phosphorylation|Thermogenesis
evm.model.Contig61.43	121.101	96.736	102.231	154.603	142.935	109.141	367.002	237.504	299.172	401.309	166.377	336.569	192.751	169.211	187.05	HADHB	ECHB_MACFA	Trifunctional enzyme subunit beta, mitochondrial OS=Macaca fascicularis GN=HADHB PE=2 SV=1	tr|A0A0L0CNA6|A0A0L0CNA6_LUCCU	Uncharacterized protein OS=Lucilia cuprina GN=FF38_10053 PE=3 SV=1	IPR020616:Thiolase, N-terminal	GO:0008152	metabolic process	path:ko00062,path:ko00071,path:ko00280	Fatty acid elongation|Fatty acid degradation|Valine, leucine and isoleucine degradation
evm.model.Contig29.238	59.8899	48.9888	35.3624	499.695	346.876	422.849	149.645	160.486	160.02	410.522	289.67	437.535	132.188	155.385	187.003				tr|A0A0L0CPL9|A0A0L0CPL9_LUCCU	Uncharacterized protein OS=Lucilia cuprina GN=FF38_05959 PE=4 SV=1	IPR008197:WAP-type 'four-disulfide core' domain	GO:0005576	extracellular region
evm.model.Contig101.61	676.415	775.701	667.384	346.069	402.274	387.348	321.699	305.895	307.074	175.454	140.864	150.112	182.024	165.453	186.809	RpL38	RL38_DROYA	60S ribosomal protein L38 OS=Drosophila yakuba GN=RpL38 PE=3 SV=1	tr|A0A0L0BLJ0|A0A0L0BLJ0_LUCCU	Uncharacterized protein OS=Lucilia cuprina GN=FF38_00326 PE=3 SV=1	IPR002675:Ribosomal protein L38e	GO:0003735	structural constituent of ribosome
evm.model.Contig16.334	32.1722	24.7344	25.3776	35.8102	52.5313	18.1639	344.909	304.351	303.872	141.127	86.0944	201.943	218.449	286.284	186.461	PGRP-SB1	PGSB1_DROME	Peptidoglycan-recognition protein SB1 OS=Drosophila melanogaster GN=PGRP-SB1 PE=2 SV=2	tr|A0A0L0BXR9|A0A0L0BXR9_LUCCU	Peptidoglycan-recognition protein OS=Lucilia cuprina GN=FF38_01452 PE=3 SV=1	IPR006619:Peptidoglycan recognition protein family domain, metazoa/bacteria	GO:0008270	zinc ion binding
evm.model.Contig111.32	15.6805	13.2566	14.1395	7.58119	11.8662	10.4234	130.882	87.4946	129.365	401.236	91.6918	390.21	50.9777	80.5695	186.452	GL13816	PTER_DROPE	Phosphotriesterase-related protein OS=Drosophila persimilis GN=GL13816 PE=3 SV=1	tr|A0A0L0CNN8|A0A0L0CNN8_LUCCU	Uncharacterized protein OS=Lucilia cuprina GN=FF38_09002 PE=3 SV=1	IPR001559:Phosphotriesterase	GO:0008270	zinc ion binding
evm.model.Contig96.70	953.407	835.288	832.914	937.763	925.978	853.198	1104.62	1062.6	1148.84	340.067	689.889	309.809	249.941	189.343	186.135	UQCRB	QCR7_BOVIN	Cytochrome b-c1 complex subunit 7 OS=Bos taurus GN=UQCRB PE=1 SV=3	tr|B4N931|B4N931_DROWI	Cytochrome b-c1 complex subunit 7 OS=Drosophila willistoni GN=Dwil\GK19174 PE=3 SV=1	IPR003197:Cytochrome b-c1 complex subunit 7	GO:0005750	mitochondrial respiratory chain complex III	path:ko00190,path:ko04260,path:ko04714,path:ko04932,path:ko05010,path:ko05012,path:ko05016	Oxidative phosphorylation|Cardiac muscle contraction|Thermogenesis|Non-alcoholic fatty liver disease (NAFLD)|Alzheimer's disease|Parkinson's disease|Huntington's disease
evm.model.Contig73.67	556.7	475.709	513.496	223.855	294.814	293.509	246.48	305.376	279.458	434.4	229.371	295.687	202.588	205.868	186.076	HmgZ	HMGZ_DROME	High mobility group protein Z OS=Drosophila melanogaster GN=HmgZ PE=1 SV=1	tr|A0A1L8EH89|A0A1L8EH89_HAEIR	Putative hmg high mobility group box OS=Haematobia irritans PE=4 SV=1	IPR009071:High mobility group box domain
evm.model.Contig23.236	25.7575	7.00541	18.9001	0.866827	3.1969	0.622598	54.0025	75.4545	63.5835	70.2614	6.54537	66.633	111.434	174.994	185.36	F40A3.3	PEBPH_CAEEL	Phosphatidylethanolamine-binding protein homolog F40A3.3 OS=Caenorhabditis elegans GN=F40A3.3 PE=3 SV=1	tr|T1PHN6|T1PHN6_MUSDO	Phosphatidylethanolamine-binding protein OS=Musca domestica GN=101896933 PE=2 SV=1	IPR008914:Phosphatidylethanolamine-binding protein
evm.model.Contig1.825	26.4846	29.4537	27.3116	27.7506	27.0802	27.2166	117.198	117.507	114.701	245.181	130.794	283.408	162.291	137.656	185.2	Idgf3	IDGF3_DROSI	Chitinase-like protein Idgf3 OS=Drosophila simulans GN=Idgf3 PE=3 SV=1	tr|A0A0L0C2L1|A0A0L0C2L1_LUCCU	Uncharacterized protein (Fragment) OS=Lucilia cuprina GN=FF38_06031 PE=4 SV=1	IPR011583:Chitinase II	GO:0008061	chitin binding
evm.model.Contig84.45	0.707297	0.0175007	0.665474	0.723681	0.241794	0.465239	5.77861	20.4512	166.689	276.784	390.462	455.96	221.775	236.96	184.715	Sema-1a	ARY1_CALVI	Arylphorin subunit A4 OS=Calliphora vicina PE=2 SV=1	tr|O18321|O18321_CALVI	Arylphorin OS=Calliphora vicina PE=2 SV=1	IPR013788:Hemocyanin/hexamerin
evm.model.Contig139.38	7.92068	9.95885	9.99084	12.7059	7.85247	6.61516	17.6716	9.34953	12.7179	279.12	97.9405	270.103	195.367	185.106	183.89				tr|A0A0L0C0E4|A0A0L0C0E4_LUCCU	Uncharacterized protein OS=Lucilia cuprina GN=FF38_10377 PE=4 SV=1	IPR010548:BNIP3	GO:0005740	mitochondrial envelope	path:ko04068,path:ko04137,path:ko04140,path:ko05134	FoxO signaling pathway|Mitophagy - animal|Autophagy - animal|Legionellosis
evm.model.Contig92.78	95.7846	85.935	83.0324	94.0029	101.52	101.146	76.9948	83.245	92.5336	202.494	131.278	168.075	210.065	234.837	183.86	Psmb7	PSB7_RAT	Proteasome subunit beta type-7 OS=Rattus norvegicus GN=Psmb7 PE=1 SV=1	tr|A0A0L0C117|A0A0L0C117_LUCCU	Proteasome subunit beta type OS=Lucilia cuprina GN=FF38_04643 PE=3 SV=1	IPR024689:Proteasome beta subunit, C-terminal	GO:0004298	threonine-type endopeptidase activity	path:ko03050	Proteasome
evm.model.Contig111.37	52.0308	56.2906	49.6155	52.3204	40.2544	42.8188	47.6327	40.4031	36.3124	123.703	60.1934	98.283	169.486	171.439	183.67	ZFAND6	ZFAN6_BOVIN	AN1-type zinc finger protein 6 OS=Bos taurus GN=ZFAND6 PE=2 SV=1	tr|A0A1A9YST6|A0A1A9YST6_GLOFF	Uncharacterized protein OS=Glossina fuscipes fuscipes PE=4 SV=1	IPR002653:Zinc finger, A20-type	GO:0003677	DNA binding
evm.model.Contig132.13	37.1349	37.2766	35.455	29.0009	31.5325	25.0847	67.8838	66.1339	57.6315	225.727	126.873	217.852	182.306	167.318	181.76				tr|A0A0L0C9Z9|A0A0L0C9Z9_LUCCU	Uncharacterized protein OS=Lucilia cuprina GN=FF38_05517 PE=4 SV=1	IPR001806:Small GTPase superfamily	GO:0003924	GTPase activity	path:ko04137,path:ko04138,path:ko04140,path:ko04144,path:ko04145,path:ko05132,path:ko05146,path:ko05152	Mitophagy - animal|Autophagy - yeast|Autophagy - animal|Endocytosis|Phagosome|Salmonella infection|Amoebiasis|Tuberculosis
evm.model.Contig40.151	152.617	143.916	126.883	211.524	206.751	154.595	277.38	244.365	252.828	360.069	217.636	415.685	123.033	138.621	181.262	Sb	STUB_DROME	Serine proteinase stubble OS=Drosophila melanogaster GN=Sb PE=2 SV=2	tr|L7NL57|L7NL57_LUCSE	Putative salivary trypsin OS=Lucilia sericata PE=2 SV=1	IPR001254:Serine proteases, trypsin domain	GO:0004252	serine-type endopeptidase activity
evm.model.Contig63.63	1131.96	993.329	917.039	1160.32	1327.7	1127.26	1473.92	1411.1	1355	355.112	701.607	264.707	206.624	194.407	180.757	COX5A	COX5A_DROME	Cytochrome c oxidase subunit 5A, mitochondrial OS=Drosophila melanogaster GN=COX5A PE=2 SV=2	tr|A0A0L0BYK4|A0A0L0BYK4_LUCCU	Cytochrome c oxidase subunit 5A, mitochondrial OS=Lucilia cuprina GN=FF38_04578 PE=4 SV=1	IPR003204:Cytochrome c oxidase, subunit Va/VI	GO:0004129	cytochrome-c oxidase activity	path:ko00190,path:ko04260,path:ko04714,path:ko04932,path:ko05010,path:ko05012,path:ko05016	Oxidative phosphorylation|Cardiac muscle contraction|Thermogenesis|Non-alcoholic fatty liver disease (NAFLD)|Alzheimer's disease|Parkinson's disease|Huntington's disease
evm.model.Contig1.369	25.9075	24.1078	23.5567	18.2911	24.8664	20.3835	86.333	113.247	110.796	236.223	125.904	251.766	180.997	171.383	179.99	Dhrs7	DHRS7_MOUSE	Dehydrogenase/reductase SDR family member 7 OS=Mus musculus GN=Dhrs7 PE=1 SV=2	tr|A0A1I8M932|A0A1I8M932_MUSDO	Uncharacterized protein OS=Musca domestica GN=101894258 PE=4 SV=1	IPR002347:Short-chain dehydrogenase/reductase SDR
evm.model.Contig48.5	54.1959	50.9715	51.5131	30.6469	28.0697	27.3233	62.5844	94.8795	105.743	145.675	89.9465	131.789	169.848	168.239	179.296	APMAP	APMAP_CHICK	Adipocyte plasma membrane-associated protein OS=Gallus gallus GN=APMAP PE=2 SV=1	tr|A0A0L0CJ67|A0A0L0CJ67_LUCCU	Uncharacterized protein OS=Lucilia cuprina GN=FF38_12784 PE=4 SV=1	IPR018119:Strictosidine synthase, conserved region	GO:0009058	biosynthetic process
evm.model.Contig6.79	169.165	135.732	131.964	122.817	147.675	119.992	207.479	212.906	170.534	425.729	324.699	350.834	281.125	200.41	179.147	Tina-1	TINA1_DROME	Troponin C-akin-1 protein OS=Drosophila melanogaster GN=Tina-1 PE=2 SV=1	tr|A0A0L0CFF6|A0A0L0CFF6_LUCCU	Troponin C-akin-1 protein OS=Lucilia cuprina GN=FF38_13936 PE=4 SV=1	IPR013024:Gamma-glutamyl cyclotransferase-like
evm.model.Contig21.68	7.51319	6.02372	6.7214	4.53795	10.9745	4.24545	53.6731	65.1558	80.3725	136.186	72.7928	171.011	307.482	320.227	178.957	Agxt	SPYA_RAT	Serine--pyruvate aminotransferase, mitochondrial OS=Rattus norvegicus GN=Agxt PE=1 SV=1	tr|A0A0L0BXN4|A0A0L0BXN4_LUCCU	Uncharacterized protein (Fragment) OS=Lucilia cuprina GN=FF38_04857 PE=3 SV=1	IPR000192:Aminotransferase class V domain			path:ko00250,path:ko00260,path:ko00630,path:ko00680,path:ko04146	Alanine, aspartate and glutamate metabolism|Glycine, serine and threonine metabolism|Glyoxylate and dicarboxylate metabolism|Methane metabolism|Peroxisome
evm.model.Contig5.399	19.3373	16.1869	17.656	30.1068	40.0269	27.0463	67.0436	42.9855	59.0543	353.257	357.526	289.538	209.163	247.798	178.72				tr|A0A0L0CE89|A0A0L0CE89_LUCCU	Serine protease easter OS=Lucilia cuprina GN=FF38_05582 PE=3 SV=1	IPR001254:Serine proteases, trypsin domain	GO:0004252	serine-type endopeptidase activity
evm.model.Contig27.17	440.993	337.733	331.878	55.6579	113.842	72.8315	544.582	418.544	435.772	330.87	84.5501	308.024	203.776	147.935	178.313	ppl	GCSH_DROME	Glycine cleavage system H protein, mitochondrial OS=Drosophila melanogaster GN=ppl PE=2 SV=1	tr|A0A0L0CQS4|A0A0L0CQS4_LUCCU	Glycine cleavage system H protein OS=Lucilia cuprina GN=FF38_09158 PE=3 SV=1	IPR002930:Glycine cleavage system H-protein	GO:0005960	glycine cleavage complex	path:ko00260,path:ko00630	Glycine, serine and threonine metabolism|Glyoxylate and dicarboxylate metabolism
evm.model.Contig10.419	126.875	123.327	116.245	106.059	117.964	87.8391	83.8068	89.9204	97.4472	186.257	119.969	164.258	197.04	215.098	178.104	ben	UBE2N_DROME	Ubiquitin-conjugating enzyme E2 N OS=Drosophila melanogaster GN=ben PE=2 SV=1	tr|A0A1A9XXN1|A0A1A9XXN1_GLOFF	Uncharacterized protein OS=Glossina fuscipes fuscipes PE=3 SV=1	IPR000608:Ubiquitin-conjugating enzyme E2			path:ko04120,path:ko04624	Ubiquitin mediated proteolysis|Toll and Imd signaling pathway
evm.model.Contig35.10	56.7753	26.2669	48.03	45.4299	51.378	28.6556	94.4516	110.528	73.5635	318.678	187.204	293.718	239.752	251.453	177.734				tr|O61262|O61262_SARPE	20kDa lectin OS=Sarcophaga peregrina PE=2 SV=1	IPR001304:C-type lectin-like
evm.model.Contig89.109	20.5359	22.2866	20.3721	24.2479	28.1504	22.7484	95.8648	87.5952	93.2933	162.051	130.982	191.011	178.148	191.16	177.409	cfaD	CFAD_DICDI	Counting factor associated protein D OS=Dictyostelium discoideum GN=cfaD PE=1 SV=1	tr|O97453|O97453_SARPE	26,29kDa proteinase OS=Sarcophaga peregrina PE=2 SV=1	IPR013128:Peptidase C1A	GO:0006508	proteolysis
evm.model.Contig14.160	50.4385	61.4195	42.1164	111.389	81.6332	93.5728	100.681	69.2331	88.1872	132.468	92.8178	132.055	186.766	171.587	176.244				tr|A0A1L8EHF4|A0A1L8EHF4_HAEIR	Uncharacterized protein OS=Haematobia irritans PE=4 SV=1
evm.model.Contig18.115	0	0	0	0	0	0.573531	0	0	0	0	0	0	191.295	303.265	175.724	COL6A3	CO6A3_HUMAN	Collagen alpha-3(VI) chain OS=Homo sapiens GN=COL6A3 PE=1 SV=5	tr|A0A0L0BPT3|A0A0L0BPT3_LUCCU	Uncharacterized protein OS=Lucilia cuprina GN=FF38_12141 PE=4 SV=1	IPR002223:Pancreatic trypsin inhibitor Kunitz domain	GO:0004867	serine-type endopeptidase inhibitor activity
evm.model.Contig1.167	21.0778	22.8012	23.2601	25.085	20.775	14.058	57.2803	34.2988	35.8149	269.493	94.2874	219.646	224.158	297.464	175.309	Ldlrap1	ARH_MOUSE	Low density lipoprotein receptor adapter protein 1 OS=Mus musculus GN=Ldlrap1 PE=1 SV=3	tr|A0A0L0BZD6|A0A0L0BZD6_LUCCU	Uncharacterized protein OS=Lucilia cuprina GN=FF38_07580 PE=4 SV=1	IPR006020:PTB/PI domain	GO:0005515	protein binding	path:ko04144,path:ko04979	Endocytosis|Cholesterol metabolism
evm.model.Contig88.9	40.2328	31.837	43.722	30.3691	28.7412	23.5508	45.802	67.1437	53.926	136.101	74.6622	115.686	175.484	180.637	173.668	ARHGDIB	GDIR2_BOVIN	Rho GDP-dissociation inhibitor 2 OS=Bos taurus GN=ARHGDIB PE=2 SV=3	tr|A0A0L0CDU4|A0A0L0CDU4_LUCCU	Uncharacterized protein (Fragment) OS=Lucilia cuprina GN=FF38_11974 PE=4 SV=1	IPR000406:Rho protein GDP-dissociation inhibitor	GO:0005094	Rho GDP-dissociation inhibitor activity	path:ko04722,path:ko04962	Neurotrophin signaling pathway|Vasopressin-regulated water reabsorption
evm.model.Contig39.105	735.305	669.196	659.969	798.865	868.096	771.205	901.088	926.049	940.735	287.745	443.364	237.081	185.573	171.123	173.621	Atp5d	ATPD_RAT	ATP synthase subunit delta, mitochondrial OS=Rattus norvegicus GN=Atp5d PE=1 SV=2	tr|A0A0L0C0E8|A0A0L0C0E8_LUCCU	Uncharacterized protein (Fragment) OS=Lucilia cuprina GN=FF38_10395 PE=3 SV=1	IPR001469:ATP synthase, F1 complex, delta/epsilon subunit	GO:0015986	ATP synthesis coupled proton transport	path:ko00190,path:ko04714,path:ko05010,path:ko05012,path:ko05016	Oxidative phosphorylation|Thermogenesis|Alzheimer's disease|Parkinson's disease|Huntington's disease
evm.model.Contig19.242	61.5178	59.988	56.9692	57.6356	63.8349	64.9791	45.1534	55.2017	53.2216	137.145	88.5801	133.621	192.387	214.385	173.003	Psmc6	PRS10_MOUSE	26S protease regulatory subunit 10B OS=Mus musculus GN=Psmc6 PE=1 SV=1	tr|A0A0L0BTK4|A0A0L0BTK4_LUCCU	Uncharacterized protein OS=Lucilia cuprina GN=FF38_00172 PE=3 SV=1	IPR003959:ATPase, AAA-type, core	GO:0005524	ATP binding	path:ko03050,path:ko05169	Proteasome|Epstein-Barr virus infection
evm.model.Contig19.209	123.691	110.596	102.299	68.5117	84.6472	105.571	87.5377	120.107	143.764	65.7519	67.816	70.8279	219.414	213.613	172.974	Spase25	SPCS2_DROME	Signal peptidase complex subunit 2 OS=Drosophila melanogaster GN=Spase25 PE=2 SV=1	tr|A0A0L0BTN7|A0A0L0BTN7_LUCCU	Signal peptidase complex subunit 2 OS=Lucilia cuprina GN=FF38_00160 PE=4 SV=1	IPR009582:Signal peptidase complex subunit 2	GO:0005787	signal peptidase complex	path:ko03060	Protein export
evm.model.Contig177.16	169.273	177.585	191.813	88.7515	98.5703	115.646	125.554	171.817	173.405	196.323	123.926	164.332	160.661	175	172.543	Sar1b	SAR1B_MOUSE	GTP-binding protein SAR1b OS=Mus musculus GN=Sar1b PE=1 SV=1	tr|A0A0L0BZ28|A0A0L0BZ28_LUCCU	Uncharacterized protein OS=Lucilia cuprina GN=FF38_09611 PE=3 SV=1	IPR006689:Small GTPase superfamily, ARF/SAR type	GO:0005525	GTP binding	path:ko04141,path:ko05134	Protein processing in endoplasmic reticulum|Legionellosis
evm.model.Contig23.201	305.979	333.713	278.354	558.417	499.06	442.448	370.766	369.09	498.638	399.311	1013.14	207.327	204.515	187.972	172.23	PyK	KPYK_DROME	Pyruvate kinase OS=Drosophila melanogaster GN=PyK PE=2 SV=2	tr|A0A0L0CGM6|A0A0L0CGM6_LUCCU	Pyruvate kinase (Fragment) OS=Lucilia cuprina GN=FF38_11726 PE=3 SV=1	IPR015793:Pyruvate kinase, barrel	GO:0000287	magnesium ion binding	path:ko00010,path:ko00230,path:ko00620,path:ko04922,path:ko04930,path:ko05165,path:ko05203,path:ko05230	Glycolysis / Gluconeogenesis|Purine metabolism|Pyruvate metabolism|Glucagon signaling pathway|Type II diabetes mellitus|Human papillomavirus infection|Viral carcinogenesis|Central carbon metabolism in cancer
evm.model.Contig15.52	935.273	712.418	839.048	161.893	237.893	232.124	978.565	1081.68	1108.31	302.315	149.016	257.882	187.47	197.056	172.163	Vha13	VATG_DROME	V-type proton ATPase subunit G OS=Drosophila melanogaster GN=Vha13 PE=3 SV=1	tr|A0A0L0CJI0|A0A0L0CJI0_LUCCU	V-type proton ATPase subunit G OS=Lucilia cuprina GN=FF38_13094 PE=3 SV=1	IPR005124:Vacuolar (H+)-ATPase G subunit	GO:0015992	proton transport	path:ko00190,path:ko04145,path:ko04150,path:ko04721,path:ko04966,path:ko05110,path:ko05120,path:ko05323	Oxidative phosphorylation|Phagosome|mTOR signaling pathway|Synaptic vesicle cycle|Collecting duct acid secretion|Vibrio cholerae infection|Epithelial cell signaling in Helicobacter pylori infection|Rheumatoid arthritis
evm.model.Contig98.72	733.68	686.037	642.756	782.224	917.301	876.258	920.609	936.665	956.764	216.936	447.308	169.937	184.368	177.238	171.864	COX5B	COX5B_BOVIN	Cytochrome c oxidase subunit 5B, mitochondrial OS=Bos taurus GN=COX5B PE=1 SV=2	tr|A0A0L0C4C8|A0A0L0C4C8_LUCCU	Uncharacterized protein OS=Lucilia cuprina GN=FF38_12662 PE=4 SV=1	IPR002124:Cytochrome c oxidase, subunit Vb	GO:0004129	cytochrome-c oxidase activity	path:ko00190,path:ko04260,path:ko04714,path:ko04932,path:ko05010,path:ko05012,path:ko05016	Oxidative phosphorylation|Cardiac muscle contraction|Thermogenesis|Non-alcoholic fatty liver disease (NAFLD)|Alzheimer's disease|Parkinson's disease|Huntington's disease
evm.model.Contig2.715	68.7224	62.046	58.2656	111.904	96.8735	88.3194	32.3753	29.7115	25.1229	90.243	57.0635	76.6176	195.756	196.084	171.623	Capsl	CAPSL_MOUSE	Calcyphosin-like protein OS=Mus musculus GN=Capsl PE=2 SV=4	tr|A0A0L0BR82|A0A0L0BR82_LUCCU	Uncharacterized protein OS=Lucilia cuprina GN=FF38_13476 PE=4 SV=1	IPR002048:EF-hand domain	GO:0005509	calcium ion binding
evm.model.Contig6.543	33.175	29.5404	31.7032	25.4491	22.9794	27.2254	20.9338	22.5745	23.7213	51.1752	36.4641	46.1357	120.532	101.938	171.22	Ppp1r15a	PR15A_MOUSE	Protein phosphatase 1 regulatory subunit 15A OS=Mus musculus GN=Ppp1r15a PE=1 SV=1	tr|A0A0L0BQF9|A0A0L0BQF9_LUCCU	Uncharacterized protein OS=Lucilia cuprina GN=FF38_12907 PE=4 SV=1	IPR019523:Protein phosphatase 1, regulatory subunit 15A/B, C-terminal
evm.model.Contig15.47	46.5208	44.7976	44.5974	46.4224	50.0509	49.3744	45.9862	48.3687	51.5535	138.261	89.3708	129.715	177.572	187.687	171.174	PSMD12	PSD12_PONAB	26S proteasome non-ATPase regulatory subunit 12 OS=Pongo abelii GN=PSMD12 PE=2 SV=3	tr|A0A0L0CD45|A0A0L0CD45_LUCCU	Uncharacterized protein (Fragment) OS=Lucilia cuprina GN=FF38_00822 PE=4 SV=1	IPR000717:Proteasome component (PCI) domain	GO:0005515	protein binding	path:ko03050,path:ko05169	Proteasome|Epstein-Barr virus infection
evm.model.Contig32.207	41.3231	40.8832	43.6158	38.627	39.6895	40.3247	38.3183	51.0539	48.6769	125.2	76.2902	112.967	186.611	195.809	171.136	PSMD2	PSMD2_PONAB	26S proteasome non-ATPase regulatory subunit 2 OS=Pongo abelii GN=PSMD2 PE=2 SV=1	tr|A0A0L0BNP8|A0A0L0BNP8_LUCCU	Uncharacterized protein (Fragment) OS=Lucilia cuprina GN=FF38_05888 PE=4 SV=1	IPR016643:26S proteasome regulatory complex, non-ATPase subcomplex, Rpn1 subunit	GO:0000502	proteasome complex	path:ko03050,path:ko05169	Proteasome|Epstein-Barr virus infection
evm.model.Contig44.182	186.28	186.73	173.404	346.036	317.721	274.983	369.95	378.792	372.842	450.389	359.626	399.539	166.679	166.648	170.644	AnxB9	ANXB9_DROME	Annexin B9 OS=Drosophila melanogaster GN=AnxB9 PE=2 SV=2	tr|D3TRS6|D3TRS6_GLOMM	Annexin OS=Glossina morsitans morsitans PE=2 SV=1	IPR001464:Annexin	GO:0005509	calcium ion binding
evm.model.Contig171.38	55.9627	43.0924	49.2619	110.783	97.9788	76.6673	152.781	183.034	173.134	243.232	103.728	205.103	156.071	187.542	169.614	Ech1	ECH1_MOUSE	Delta(3,5)-Delta(2,4)-dienoyl-CoA isomerase, mitochondrial OS=Mus musculus GN=Ech1 PE=1 SV=1	tr|A0A0L0C9M2|A0A0L0C9M2_LUCCU	Uncharacterized protein OS=Lucilia cuprina GN=FF38_09175 PE=4 SV=1	IPR001753:Crotonase superfamily	GO:0003824	catalytic activity	path:ko04146	Peroxisome
evm.model.Contig1.274	62.006	49.7766	48.3642	68.2628	88.7612	89.0958	55.8917	66.8648	60.5496	142.876	76.8262	121.145	172.949	220.764	169.342	Pomp	POMP_MOUSE	Proteasome maturation protein OS=Mus musculus GN=Pomp PE=1 SV=1	tr|A0A0L0BWY2|A0A0L0BWY2_LUCCU	Uncharacterized protein OS=Lucilia cuprina GN=FF38_08892 PE=4 SV=1	IPR008012:Proteasome maturation factor Ump1	GO:0043248	proteasome assembly	path:ko03050	Proteasome
evm.model.Contig17.104	697.687	561.754	569.558	853.643	930.863	899.023	822.994	786.152	744.455	262.646	487.655	183.253	192.581	178.162	168.869	COX6A1	CX6A1_HUMAN	Cytochrome c oxidase subunit 6A1, mitochondrial OS=Homo sapiens GN=COX6A1 PE=1 SV=4	tr|A0A1I8NGF0|A0A1I8NGF0_MUSDO	Uncharacterized protein OS=Musca domestica GN=101899000 PE=3 SV=1	IPR001349:Cytochrome c oxidase, subunit VIa	GO:0004129	cytochrome-c oxidase activity	path:ko00190,path:ko04260,path:ko04714,path:ko04932,path:ko05010,path:ko05012,path:ko05016	Oxidative phosphorylation|Cardiac muscle contraction|Thermogenesis|Non-alcoholic fatty liver disease (NAFLD)|Alzheimer's disease|Parkinson's disease|Huntington's disease
evm.model.Contig153.45	43.4044	33.4893	42.8362	15.4371	18.4014	18.9388	67.7665	66.1289	76.1101	264.113	126.06	281.951	157.368	162.639	168.554	pr	PTPS_DROME	6-pyruvoyl tetrahydrobiopterin synthase OS=Drosophila melanogaster GN=pr PE=1 SV=1	tr|A0A1I8NER8|A0A1I8NER8_MUSDO	Uncharacterized protein OS=Musca domestica GN=101896166 PE=4 SV=1	IPR007115:6-pyruvoyl tetrahydropterin synthase/QueD family protein			path:ko00790	Folate biosynthesis
evm.model.Contig29.30	7.28833	5.67507	7.49832	7.56385	10.3495	9.30809	11.9332	2.85428	8.74156	16.0641	6.22812	9.20353	390.243	488.699	167.518	Hsp22	HSP22_DROME	Heat shock protein 22 OS=Drosophila melanogaster GN=Hsp22 PE=1 SV=4	tr|Q15G77|Q15G77_CULPP	Small heat shock protein (Fragment) OS=Culex pipiens pipiens PE=2 SV=1	IPR001436:Alpha crystallin/Heat shock protein			path:ko04141,path:ko04213	Protein processing in endoplasmic reticulum|Longevity regulating pathway - multiple species
evm.model.Contig83.93	39.5411	42.0642	42.0179	36.148	38.4475	38.2032	32.6539	39.2015	34.4391	126.615	71.3116	114.246	189.524	202.715	167.161	Usp5	UBP5_MOUSE	Ubiquitin carboxyl-terminal hydrolase 5 OS=Mus musculus GN=Usp5 PE=1 SV=1	tr|A0A0L0CCA5|A0A0L0CCA5_LUCCU	Ubiquitinyl hydrolase 1 OS=Lucilia cuprina GN=FF38_13520 PE=3 SV=1	IPR001607:Zinc finger, UBP-type	GO:0016579	protein deubiquitination
evm.model.Contig18.135	0	0	0	0.65521	0	0	0	0	0	0	0	0.726245	277.453	221.139	167.145	Dll	VKT5_HAPSC	KappaPI-theraphotoxin-Hs1a OS=Haplopelma schmidti PE=2 SV=1	tr|A0A0L0BRU8|A0A0L0BRU8_LUCCU	Uncharacterized protein OS=Lucilia cuprina GN=FF38_12133 PE=4 SV=1	IPR002223:Pancreatic trypsin inhibitor Kunitz domain	GO:0004867	serine-type endopeptidase inhibitor activity
evm.model.Contig62.31	253.733	248.442	292.806	87.1131	95.8473	84.5641	89.8969	126.793	113.804	191.041	120.312	149.693	179.926	168.419	166.95	Hrb27C	RB27C_DROME	Heterogeneous nuclear ribonucleoprotein 27C OS=Drosophila melanogaster GN=Hrb27C PE=1 SV=2	tr|A0A1A9V9K9|A0A1A9V9K9_GLOAU	Uncharacterized protein OS=Glossina austeni PE=4 SV=1	IPR034134:DAZ-associated protein 1, RNA recognition motif 1	GO:0003676	nucleic acid binding	path:ko03015	mRNA surveillance pathway
evm.model.Contig82.87	472.21	417.679	401.789	162.641	202.615	122.328	404.702	431.234	537.715	175.691	185.69	224.193	159.692	158.329	166.641	Hsp67Bb	HS6B_DROME	Heat shock protein 67B2 OS=Drosophila melanogaster GN=Hsp67Bb PE=2 SV=1	tr|A0A0L0CQ49|A0A0L0CQ49_LUCCU	Sulfurtransferase OS=Lucilia cuprina GN=FF38_02733 PE=4 SV=1	IPR001763:Rhodanese-like domain
evm.model.Contig82.64	301.039	286.69	297.925	117.56	158.68	141.434	59.958	88.7999	76.2897	141.069	96.1551	105.768	150.781	128.985	166.089	His2Av	H2AV_DROME	Histone H2A.v OS=Drosophila melanogaster GN=His2Av PE=1 SV=2	tr|A0A1A9XZF1|A0A1A9XZF1_GLOFF	Histone H2A OS=Glossina fuscipes fuscipes PE=3 SV=1	IPR002119:Histone H2A	GO:0000786	nucleosome	path:ko04217,path:ko05034,path:ko05322	Necroptosis|Alcoholism|Systemic lupus erythematosus
evm.model.Contig89.69	136.829	95.8528	101.259	76.0105	84.722	95.2251	206.836	299.293	303.923	161.422	195.058	185.94	159.004	171.284	165.685				tr|A0A0L0BKK3|A0A0L0BKK3_LUCCU	Uncharacterized protein (Fragment) OS=Lucilia cuprina GN=FF38_06922 PE=4 SV=1	IPR006121:Heavy metal-associated domain, HMA	GO:0030001	metal ion transport	path:ko04978	Mineral absorption
evm.model.Contig26.228	136.455	128.615	128.162	65.1867	76.8246	74.5541	81.5476	104.458	127.354	90.5309	68.9133	79.5365	179.67	165.772	165.279	bai	TMEDA_DROVI	Transmembrane emp24 domain-containing protein bai OS=Drosophila virilis GN=bai PE=3 SV=1	tr|A0A1L8EF07|A0A1L8EF07_HAEIR	Putative emp24/gp25l/p24 family of membrane trafficking OS=Haematobia irritans PE=3 SV=1	IPR009038:GOLD domain	GO:0006810	transport
evm.model.Contig113.49	530.136	518.655	566.208	205.822	238.056	234.858	174.433	201.531	179.843	156.697	116.182	137.389	173.478	164.359	165.138	eIF3-S5-1	EI3F1_DROGR	Eukaryotic translation initiation factor 3 subunit F-1 OS=Drosophila grimshawi GN=eIF3-S5-1 PE=3 SV=1	tr|A0A0L0C3G0|A0A0L0C3G0_LUCCU	Eukaryotic translation initiation factor 3 subunit F OS=Lucilia cuprina GN=FF38_06365 PE=3 SV=1	IPR027531:Eukaryotic translation initiation factor 3 subunit F	GO:0003743	translation initiation factor activity	path:ko03013	RNA transport
evm.model.Contig52.52	47.6922	49.0265	51.7218	34.198	32.576	37.0537	45.5476	46.6964	54.1687	187.532	89.449	196.885	183.599	199.27	165.01	FIS1	FIS1_HUMAN	Mitochondrial fission 1 protein OS=Homo sapiens GN=FIS1 PE=1 SV=2	tr|A0A1A9WXE6|A0A1A9WXE6_9MUSC	Mitochondrial fission 1 protein OS=Glossina brevipalpis PE=3 SV=1	IPR016543:Mitochondria fission 1 protein	GO:0000266	mitochondrial fission	path:ko04137,path:ko04139	Mitophagy - animal|Mitophagy - yeast
evm.model.Contig87.86	230.066	225.62	231.008	184.853	173.88	169.294	229.82	316.705	272.831	325.657	226.133	299.366	150.458	162.411	163.902	NAAT1	CALM_METSE	Calmodulin OS=Metridium senile PE=1 SV=3	tr|M3Y1M2|M3Y1M2_MUSPF	Uncharacterized protein OS=Mustela putorius furo PE=4 SV=1	IPR002048:EF-hand domain	GO:0005509	calcium ion binding	path:ko04014,path:ko04015,path:ko04016,path:ko04020,path:ko04022,path:ko04024,path:ko04070,path:ko04114,path:ko04218,path:ko04261,path:ko04270,path:ko04371,path:ko04625,path:ko04626,path:ko04713,path:ko04720,path:ko04722,path:ko04728,path:ko04740,path:ko04744,path:ko04745,path:ko04750,path:ko04910,path:ko04912,path:ko04915,path:ko04916,path:ko04921,path:ko04922,path:ko04924,path:ko04925,path:ko04…	Ras signaling pathway|Rap1 signaling pathway|MAPK signaling pathway - plant|Calcium signaling pathway|cGMP-PKG signaling pathway|cAMP signaling pathway|Phosphatidylinositol signaling system|Oocyte meiosis|Cellular senescence|Adrenergic signaling in cardiomyocytes|Vascular smooth muscle contraction|Apelin signaling pathway|C-type lectin receptor signaling pathway|Plant-pathogen interaction|Circadi…
evm.model.Contig17.171	320.534	348.633	283.285	821.762	890.467	775.273	647.589	695.671	635.725	183.945	394.998	151.033	150.336	107.796	162.943	Cox7c	COX7C_MOUSE	Cytochrome c oxidase subunit 7C, mitochondrial OS=Mus musculus GN=Cox7c PE=1 SV=1	tr|A0A0L0BMJ4|A0A0L0BMJ4_LUCCU	Uncharacterized protein OS=Lucilia cuprina GN=FF38_14078 PE=4 SV=1	IPR004202:Cytochrome c oxidase subunit VIIc	GO:0004129	cytochrome-c oxidase activity	path:ko00190,path:ko04260,path:ko04714,path:ko04932,path:ko05010,path:ko05012,path:ko05016	Oxidative phosphorylation|Cardiac muscle contraction|Thermogenesis|Non-alcoholic fatty liver disease (NAFLD)|Alzheimer's disease|Parkinson's disease|Huntington's disease
evm.model.Contig12.344	26.7989	20.2195	22.4867	62.708	42.3531	44.7702	75.3752	96.4614	113.349	148.421	125.149	179.891	150.736	163.638	162.612	EH1	HYEP1_CTEFE	Juvenile hormone epoxide hydrolase 1 OS=Ctenocephalides felis GN=EH1 PE=1 SV=3	tr|T1PCN6|T1PCN6_MUSDO	Epoxide hydrolase OS=Musca domestica GN=101900320 PE=2 SV=1	IPR000639:Epoxide hydrolase-like	GO:0003824	catalytic activity	path:ko00981	Insect hormone biosynthesis
evm.model.Contig32.63	208.128	196.45	226.563	309.424	285.161	271.845	291.449	245.917	249.062	345.565	482.235	293.03	142.479	151.802	162.545				tr|A0A0L0CS06|A0A0L0CS06_LUCCU	Uncharacterized protein OS=Lucilia cuprina GN=FF38_12261 PE=4 SV=1	IPR027854:Protein of unknown function DUF4535
evm.model.Contig8.137	71.5263	108.376	97.5593	35.7974	29.8401	24.8785	57.6091	54.0936	59.6816	174.659	98.9509	195.415	161.906	161.428	162.452				tr|A0A0L0CJL4|A0A0L0CJL4_LUCCU	Uncharacterized protein OS=Lucilia cuprina GN=FF38_04997 PE=4 SV=1	IPR004827:Basic-leucine zipper domain	GO:0003700	transcription factor activity, sequence-specific DNA binding
evm.model.Contig89.40	13.1985	13.4657	17.966	7.84516	9.13727	7.25373	41.5634	60.4613	60.1442	188.038	111.066	340.422	145.78	203.916	161.872	Cat	CATA_DROME	Catalase OS=Drosophila melanogaster GN=Cat PE=1 SV=2	tr|A0A0L0C8Y9|A0A0L0C8Y9_LUCCU	Catalase OS=Lucilia cuprina GN=FF38_03458 PE=3 SV=1	IPR010582:Catalase immune-responsive domain	GO:0004096	catalase activity	path:ko00380,path:ko00630,path:ko04011,path:ko04016,path:ko04068,path:ko04146,path:ko04211,path:ko04212,path:ko04213,path:ko05014	Tryptophan metabolism|Glyoxylate and dicarboxylate metabolism|MAPK signaling pathway - yeast|MAPK signaling pathway - plant|FoxO signaling pathway|Peroxisome|Longevity regulating pathway|Longevity regulating pathway - worm|Longevity regulating pathway - multiple species|Amyotrophic lateral sclerosis (ALS)
evm.model.Contig29.34	3.64454	5.72305	4.53119	3.55004	7.04002	3.88717	3.27056	0.50989	2.35102	38.2179	39.529	26.2018	209.363	253.671	161.295	Hsp27	HSP27_DROME	Heat shock protein 27 OS=Drosophila melanogaster GN=Hsp27 PE=1 SV=2	tr|A0A0L0CSL4|A0A0L0CSL4_LUCCU	Heat shock protein 27 OS=Lucilia cuprina GN=FF38_05992 PE=3 SV=1	IPR001436:Alpha crystallin/Heat shock protein
evm.model.Contig1.421	544.272	485.898	494.231	223.593	266.686	272.527	188.822	205.494	187.823	132.575	112.269	103.469	165.14	150.879	160.867	GE12213	EIF3K_DROYA	Eukaryotic translation initiation factor 3 subunit K OS=Drosophila yakuba GN=GE12213 PE=2 SV=1	tr|A0A0L0BSD6|A0A0L0BSD6_LUCCU	Eukaryotic translation initiation factor 3 subunit K OS=Lucilia cuprina GN=FF38_13756 PE=3 SV=1	IPR033464:CSN8/PSMD8/EIF3K	GO:0003743	translation initiation factor activity
evm.model.Contig18.54	10.6874	10.3504	9.68729	15.9388	18.4642	16.8207	97.0468	98.06	136.979	170.485	99.8414	244.318	172.545	287.583	160.808	AGAP009593	CBPA1_ANOGA	Zinc carboxypeptidase A 1 OS=Anopheles gambiae GN=AGAP009593 PE=2 SV=3	tr|A0A0L0BRU0|A0A0L0BRU0_LUCCU	Uncharacterized protein OS=Lucilia cuprina GN=FF38_12081 PE=3 SV=1	IPR034223:Insect gut carboxypeptidase-like, carboxypeptidase domain	GO:0004181	metallocarboxypeptidase activity
evm.model.Contig69.1	45.0066	47.4166	50.0781	25.8555	28.6876	23.6901	35.9962	49.8545	51.0609	101.674	124.969	168.107	143.088	202.394	160.403	GANAB	GANAB_PIG	Neutral alpha-glucosidase AB OS=Sus scrofa GN=GANAB PE=1 SV=1	tr|A0A0L0BRC7|A0A0L0BRC7_LUCCU	Uncharacterized protein OS=Lucilia cuprina GN=FF38_00195 PE=3 SV=1	IPR025887:Glycoside hydrolase family 31, N-terminal domain	GO:0004553	hydrolase activity, hydrolyzing O-glycosyl compounds	path:ko00510,path:ko04141	N-Glycan biosynthesis|Protein processing in endoplasmic reticulum
evm.model.Contig7.319	76.607	93.7077	91.0325	67.4069	78.1105	67.4419	68.6993	59.4102	77.7382	187.025	132.374	171.396	198.289	222.151	160.242				tr|A0A0L0BS54|A0A0L0BS54_LUCCU	Uncharacterized protein OS=Lucilia cuprina GN=FF38_08049 PE=3 SV=1	IPR008011:Complex 1 LYR protein
evm.model.Contig9.179	262.1	301.586	325.015	138.802	133.104	126.245	161.143	158.322	146.678	146.576	89.7105	115.768	145.366	140.991	160.104				tr|A0A0L0C8Z9|A0A0L0C8Z9_LUCCU	Uncharacterized protein OS=Lucilia cuprina GN=FF38_05048 PE=3 SV=1	IPR013763:Cyclin-like
evm.model.Contig88.38	332.841	350.336	408.092	131.293	145.724	142.313	93.0112	124.691	111.186	140.368	117.966	133.169	179.718	188.18	159.605	Rsf1	RX21_DROME	RNA-binding protein Rsf1 OS=Drosophila melanogaster GN=Rsf1 PE=1 SV=1	tr|A0A0L0BQ10|A0A0L0BQ10_LUCCU	RNA-binding protein Rsf1 OS=Lucilia cuprina GN=FF38_00667 PE=4 SV=1	IPR000504:RNA recognition motif domain	GO:0003676	nucleic acid binding
evm.model.Contig11.102	24.4745	25.8157	20.3213	56.1077	47.7779	38.0379	100.036	61.2557	56.3448	6.1832	7.35756	3.42227	524.672	212.527	159.389				tr|A0A0L0BXH8|A0A0L0BXH8_LUCCU	Uncharacterized protein OS=Lucilia cuprina GN=FF38_04468 PE=4 SV=1	IPR017996:Major royal jelly protein/protein yellow
evm.model.Contig173.47	438.364	366.574	405.081	193.97	289.202	273.566	554.725	548.187	534.234	177.897	117.712	153.703	181.113	166.83	159.004	Vha14-1	VATF1_DROME	V-type proton ATPase subunit F 1 OS=Drosophila melanogaster GN=Vha14-1 PE=1 SV=1	tr|A0A0L0BU90|A0A0L0BU90_LUCCU	V-type proton ATPase subunit F OS=Lucilia cuprina GN=FF38_02974 PE=3 SV=1	IPR005772:ATPase, V1 complex, subunit F, eukaryotic	GO:0034220	ion transmembrane transport	path:ko00190,path:ko04145,path:ko04150,path:ko04721,path:ko04966,path:ko05110,path:ko05120,path:ko05323	Oxidative phosphorylation|Phagosome|mTOR signaling pathway|Synaptic vesicle cycle|Collecting duct acid secretion|Vibrio cholerae infection|Epithelial cell signaling in Helicobacter pylori infection|Rheumatoid arthritis
evm.model.Contig2.605	169.779	150.271	156.413	38.4271	52.4381	36.7478	89.7572	201.928	230.539	115.065	86.8397	104.609	214.196	181.898	158.824	Hsp90b1	ENPL_RAT	Endoplasmin OS=Rattus norvegicus GN=Hsp90b1 PE=1 SV=2	tr|A0A1L8EDL0|A0A1L8EDL0_HAEIR	Putative endoplasmic reticulum glucose-regulated protein grp94/endoplasmin hsp90 family OS=Haematobia irritans PE=3 SV=1	IPR001404:Heat shock protein Hsp90 family	GO:0005524	ATP binding	path:ko04141,path:ko04151,path:ko04626,path:ko04657,path:ko04915,path:ko04918,path:ko05200,path:ko05215,path:ko05418	Protein processing in endoplasmic reticulum|PI3K-Akt signaling pathway|Plant-pathogen interaction|IL-17 signaling pathway|Estrogen signaling pathway|Thyroid hormone synthesis|Pathways in cancer|Prostate cancer|Fluid shear stress and atherosclerosis
evm.model.Contig46.139	3.2994	2.3934	2.11195	5.27593	4.55338	3.22651	12.8133	8.99209	13.4933	84.7571	94.0855	98.4225	76.2081	108.023	158.462	fu	HEXC_BOMMO	Chitooligosaccharidolytic beta-N-acetylglucosaminidase OS=Bombyx mori PE=1 SV=1	tr|A0A0L0CIG2|A0A0L0CIG2_LUCCU	Beta-hexosaminidase OS=Lucilia cuprina GN=FF38_11222 PE=3 SV=1	IPR029019:Beta-hexosaminidase, eukaryotic type, N-terminal	GO:0004553	hydrolase activity, hydrolyzing O-glycosyl compounds	path:ko00511,path:ko00513,path:ko00520,path:ko00531,path:ko00603,path:ko00604,path:ko04142	Other glycan degradation|Various types of N-glycan biosynthesis|Amino sugar and nucleotide sugar metabolism|Glycosaminoglycan degradation|Glycosphingolipid biosynthesis - globo and isoglobo series|Glycosphingolipid biosynthesis - ganglio series|Lysosome
evm.model.Contig69.40	31.2063	36.7223	30.2709	123.782	84.6497	67.7122	105.858	72.1791	65.752	94.6216	116.212	102.516	157.973	117.87	158.314	Cyp4g1	CP4G1_DROME	Cytochrome P450 4g1 OS=Drosophila melanogaster GN=Cyp4g1 PE=2 SV=1	tr|A0A0L0CB61|A0A0L0CB61_LUCCU	Cytochrome P450 4g1 OS=Lucilia cuprina GN=FF38_06026 PE=3 SV=1	IPR001128:Cytochrome P450	GO:0005506	iron ion binding
evm.model.Contig8.315	83.9737	75.4743	89.0073	65.4959	71.1439	69.353	48.5499	58.7481	60.2635	149.274	85.6884	124.8	147.812	174.606	157.595	PSMD13	PSD13_CHICK	26S proteasome non-ATPase regulatory subunit 13 OS=Gallus gallus GN=PSMD13 PE=1 SV=1	tr|A0A0L0CBV9|A0A0L0CBV9_LUCCU	Uncharacterized protein OS=Lucilia cuprina GN=FF38_05230 PE=4 SV=1	IPR000717:Proteasome component (PCI) domain	GO:0005515	protein binding	path:ko03050,path:ko05169	Proteasome|Epstein-Barr virus infection
evm.model.Contig23.209	44.437	44.84	47.3201	38.6962	42.9385	43.3854	40.3368	47.9475	44.711	113.699	71.7598	103.831	182.914	189.877	157.506	Rpn2	PSMD1_DROME	26S proteasome non-ATPase regulatory subunit 1 OS=Drosophila melanogaster GN=Rpn2 PE=1 SV=1	tr|A0A0L0CEV3|A0A0L0CEV3_LUCCU	26S proteasome non-ATPase regulatory subunit 1 OS=Lucilia cuprina GN=FF38_11727 PE=4 SV=1	IPR002015:Proteasome/cyclosome repeat	GO:0030234	enzyme regulator activity	path:ko03050,path:ko05169	Proteasome|Epstein-Barr virus infection
evm.model.Contig9.349	0.0543795	0	0	0	0.269258	0.0684139	0.778215	0.705035	0.368402	92.0883	31.3102	31.0957	174.276	271.883	157.456	RIMS2	COA_ACRMI	Collagen alpha chain (Fragment) OS=Acropora millepora PE=1 SV=1	tr|A0A1U8DGE3|A0A1U8DGE3_ALLSI	collagen alpha-1(XXVIII) chain-like OS=Alligator sinensis GN=LOC102386671 PE=4 SV=1	IPR008160:Collagen triple helix repeat
evm.model.Contig7.441	644.975	613.604	638.081	221.034	240.332	237.37	202.16	224.567	209.047	133.381	113.654	122.885	156.464	140.928	157.337	Trip1	EIF3I_DROMO	Eukaryotic translation initiation factor 3 subunit I OS=Drosophila mojavensis GN=Trip1 PE=3 SV=1	tr|A0A0L0CG30|A0A0L0CG30_LUCCU	Eukaryotic translation initiation factor 3 subunit I OS=Lucilia cuprina GN=FF38_14293 PE=3 SV=1	IPR017986:WD40-repeat-containing domain	GO:0005515	protein binding	path:ko03013	RNA transport
evm.model.Contig23.203	156.332	91.1267	134.569	2.44862	5.28256	4.86191	8.72786	16.2222	9.48393	90.9824	33.3954	91.2653	187.619	231.208	157	CG11899	SERC_DROME	Probable phosphoserine aminotransferase OS=Drosophila melanogaster GN=CG11899 PE=2 SV=1	tr|A0A0L0CEB1|A0A0L0CEB1_LUCCU	Phosphoserine aminotransferase OS=Lucilia cuprina GN=FF38_11724 PE=3 SV=1	IPR022278:Phosphoserine aminotransferase	GO:0004648	O-phospho-L-serine:2-oxoglutarate aminotransferase activity	path:ko00260,path:ko00680,path:ko00750	Glycine, serine and threonine metabolism|Methane metabolism|Vitamin B6 metabolism
evm.model.Contig57.97	146.135	114.713	129.92	270.304	258.394	240.974	412.103	411.52	414.503	254.145	269.107	212.401	163.314	199.128	156.871	Sod2	SODM_DROME	Superoxide dismutase [Mn], mitochondrial OS=Drosophila melanogaster GN=Sod2 PE=2 SV=3	tr|A0A0L0BQP8|A0A0L0BQP8_LUCCU	Superoxide dismutase OS=Lucilia cuprina GN=FF38_10609 PE=3 SV=1	IPR001189:Manganese/iron superoxide dismutase	GO:0004784	superoxide dismutase activity	path:ko04013,path:ko04068,path:ko04146,path:ko04211,path:ko04212,path:ko04213,path:ko05016	MAPK signaling pathway - fly|FoxO signaling pathway|Peroxisome|Longevity regulating pathway|Longevity regulating pathway - worm|Longevity regulating pathway - multiple species|Huntington's disease
evm.model.Contig2.515	0.927942	1.32593	1.22986	1.08119	1.22244	0.835592	0.741203	0.0923292	0.443843	25.6504	6.32799	13.9389	152.215	113.774	156.803	Ama	AMAL_DROME	Protein amalgam OS=Drosophila melanogaster GN=Ama PE=2 SV=2	tr|A0A0L0CRD0|A0A0L0CRD0_LUCCU	Protein amalgam OS=Lucilia cuprina GN=FF38_01938 PE=4 SV=1	IPR003599:Immunoglobulin subtype
evm.model.Contig139.53	130.818	96.5837	131.867	39.8088	41.3094	28.7072	241.822	367.048	328.715	146.707	85.3617	158.064	112.499	133.969	156.238	Oat	OAT_DROME	Ornithine aminotransferase, mitochondrial OS=Drosophila melanogaster GN=Oat PE=2 SV=1	tr|A0A0L0C7X4|A0A0L0C7X4_LUCCU	Ornithine aminotransferase, mitochondrial OS=Lucilia cuprina GN=FF38_05715 PE=3 SV=1	IPR005814:Aminotransferase class-III	GO:0008483	transaminase activity	path:ko00330	Arginine and proline metabolism
evm.model.Contig47.156	186.729	152.668	163.446	112.721	113.202	107.61	288.917	432.191	387.507	297.348	104.493	315.543	108.412	89.8263	155.618	Ras64B	MYPH_ECHGR	Myophilin OS=Echinococcus granulosus PE=2 SV=1	tr|A0A0L0BR69|A0A0L0BR69_LUCCU	Transgelin OS=Lucilia cuprina GN=FF38_07227 PE=3 SV=1	IPR001715:Calponin homology domain	GO:0005515	protein binding
evm.model.Contig11.268	16.6929	16.5769	17.6778	16.9242	14.6651	13.2296	36.5201	30.3495	26.2041	151.289	69.2796	146.602	179.275	193.564	155.523	Lamp1	LAMP1_MOUSE	Lysosome-associated membrane glycoprotein 1 OS=Mus musculus GN=Lamp1 PE=1 SV=2	tr|A0A1L8EJ89|A0A1L8EJ89_HAEIR	Putative lysosome-associated membrane glycoprotein 1 OS=Haematobia irritans PE=3 SV=1	IPR002000:Lysosome-associated membrane glycoprotein	GO:0016020	membrane	path:ko04140,path:ko04142,path:ko04145,path:ko05152	Autophagy - animal|Lysosome|Phagosome|Tuberculosis
evm.model.Contig6.857	65.4479	51.3809	53.3345	81.7531	83.3819	96.4718	66.8873	69.9669	62.6655	173.792	83.9724	171.872	154.213	191.623	154.29	PSMB6	PSB6_BOVIN	Proteasome subunit beta type-6 OS=Bos taurus GN=PSMB6 PE=1 SV=1	tr|A0A1I8Q8Y2|A0A1I8Q8Y2_STOCA	Proteasome subunit beta type OS=Stomoxys calcitrans GN=106083731 PE=3 SV=1	IPR035140:Proteasome subunit beta 6	GO:0004298	threonine-type endopeptidase activity	path:ko03050	Proteasome
evm.model.Contig17.249	93.4076	121.489	107.687	426.63	399.443	280.579	714.445	508.243	610.156	756.644	1174.17	591.964	235.63	220.25	154.243				tr|A0A0L0C390|A0A0L0C390_LUCCU	Uncharacterized protein OS=Lucilia cuprina GN=FF38_11372 PE=4 SV=1
evm.model.Contig57.89	76.144	66.2817	65.8017	69.4414	78.1199	80.5753	58.1196	66.1236	58.5273	153.286	85.58	127.778	166.831	212.103	154.053	Prosalpha7	PSA3_DROME	Proteasome subunit alpha type-3 OS=Drosophila melanogaster GN=Prosalpha7 PE=1 SV=1	tr|A0A0L0BNF7|A0A0L0BNF7_LUCCU	Proteasome subunit alpha type OS=Lucilia cuprina GN=FF38_10601 PE=3 SV=1	IPR000426:Proteasome alpha-subunit, N-terminal domain	GO:0004298	threonine-type endopeptidase activity	path:ko03050	Proteasome
evm.model.Contig55.52	11.1756	11.3316	10.0845	9.97927	9.43586	7.9064	61.4537	55.9301	74.8225	435.899	242.598	491.845	115.204	131.145	153.878	ECEL1	ECEL1_HUMAN	Endothelin-converting enzyme-like 1 OS=Homo sapiens GN=ECEL1 PE=1 SV=3	tr|A0A0L0BYB3|A0A0L0BYB3_LUCCU	Uncharacterized protein OS=Lucilia cuprina GN=FF38_11936 PE=4 SV=1	IPR008753:Peptidase M13, N-terminal domain	GO:0004222	metalloendopeptidase activity
evm.model.Contig12.24	37.3768	33.7606	32.2601	43.2645	47.0316	38.0674	149.997	138.106	163.43	164.447	107.615	173.19	156.523	147.535	153.856				tr|A0A0L0CN35|A0A0L0CN35_LUCCU	Uncharacterized protein OS=Lucilia cuprina GN=FF38_01697 PE=3 SV=1	IPR000215:Serpin family	GO:0005615	extracellular space	path:ko05146	Amoebiasis
evm.model.Contig19.186	0.591807	0.232539	0	1.21787	0	0.306567	0.889886	0	0.285707	17.0714	4.40446	16.8347	179.769	154.079	153.719	CG15309	YPL1_DROME	Protein yippee-like CG15309 OS=Drosophila melanogaster GN=CG15309 PE=3 SV=1	tr|A0A1I8PVT8|A0A1I8PVT8_STOCA	Protein yippee-like OS=Stomoxys calcitrans GN=106091623 PE=3 SV=1	IPR004910:Yippee/Mis18/Cereblon
evm.model.Contig21.330	0	0	0	0	0	0.312559	0	0	0	0	0.316977	0	185.887	267.458	153.44
evm.model.Contig101.5	128.253	133.36	73.2293	284.504	420.264	203.237	767.278	616.309	680.561	310.941	565.443	353.338	158.9	228.517	153.255	wcd	AMCI_APIME	Chymotrypsin inhibitor OS=Apis mellifera PE=1 SV=1	tr|A0A0L0CHU5|A0A0L0CHU5_LUCCU	Uncharacterized protein (Fragment) OS=Lucilia cuprina GN=FF38_07677 PE=4 SV=1	IPR002919:Trypsin Inhibitor-like, cysteine rich domain
evm.model.Contig5.545	35.1159	31.1279	35.4374	45.1654	40.2516	45.8075	43.3381	50.9978	40.7277	209.396	81.5586	233.01	136.481	151.311	153.06	CG12163	CPR1_DROME	Putative cysteine proteinase CG12163 OS=Drosophila melanogaster GN=CG12163 PE=2 SV=2	tr|A0A0L0CCG6|A0A0L0CCG6_LUCCU	Putative cysteine proteinase OS=Lucilia cuprina GN=FF38_12395 PE=3 SV=1	IPR013128:Peptidase C1A	GO:0006508	proteolysis	path:ko04142,path:ko04210	Lysosome|Apoptosis
evm.model.Contig3.450	600.47	652.863	689.404	217.803	246.852	231.883	145.854	146.811	125.484	149.026	98.7681	116.945	160.018	151.666	152.761	NSA2	NSA2_HUMAN	Ribosome biogenesis protein NSA2 homolog OS=Homo sapiens GN=NSA2 PE=1 SV=1	tr|B4G7L1|B4G7L1_DROPE	GL18965 OS=Drosophila persimilis GN=Dper\GL18965 PE=4 SV=1	IPR022309:Ribosomal protein S8e/ribosomal biogenesis NSA2
evm.model.Contig80.98	0	0	0	0	1.27748	0	0	0	0	10.1798	3.18365	0.967015	466.248	511.158	152.105
evm.model.Contig63.62	401.18	384.244	379.663	246.878	332.365	295.392	150.952	225.185	207.734	150.319	112.873	128.582	148.565	173.335	151.772	CG16817	YC17_DROME	Uncharacterized protein CG16817 OS=Drosophila melanogaster GN=CG16817 PE=1 SV=1	tr|T1PFN9|T1PFN9_MUSDO	CS domain protein OS=Musca domestica GN=101891111 PE=2 SV=1	IPR007052:CS domain			path:ko00590	Arachidonic acid metabolism
evm.model.Contig9.199	11.3637	11.9148	10.9458	22.5437	26.1647	19.4199	49.0253	36.1354	53.9086	244.219	121.739	213.165	147.806	160.052	151.7	Ern1	VCP_APIME	Venom serine carboxypeptidase OS=Apis mellifera PE=2 SV=1	tr|A0A0L0CJG9|A0A0L0CJG9_LUCCU	Carboxypeptidase OS=Lucilia cuprina GN=FF38_11087 PE=3 SV=1	IPR001563:Peptidase S10, serine carboxypeptidase	GO:0004185	serine-type carboxypeptidase activity
evm.model.Contig44.214	573.093	666.723	586.688	1212.26	1148.38	770.197	1305.09	957.124	1050.83	1143.93	1615.29	761.726	198.242	244.48	151.226				tr|A0A0L0BWD1|A0A0L0BWD1_LUCCU	Uncharacterized protein OS=Lucilia cuprina GN=FF38_04626 PE=4 SV=1	IPR031828:Myofilin
evm.model.Contig45.151	44.5765	36.473	46.7437	23.4778	22.8114	22.5767	64.4631	94.693	88.7301	127.75	50.697	108.497	201.45	176.794	151.202	Hacl1	HACL1_MOUSE	2-hydroxyacyl-CoA lyase 1 OS=Mus musculus GN=Hacl1 PE=1 SV=2	tr|A0A1L8EHD5|A0A1L8EHD5_HAEIR	Putative 2-hydroxyacyl-coa lyase 1 OS=Haematobia irritans PE=3 SV=1	IPR012001:Thiamine pyrophosphate enzyme, N-terminal TPP-binding domain	GO:0003824	catalytic activity	path:ko04146	Peroxisome
evm.model.Contig130.32	41.7368	40.9149	39.912	41.3632	42.9546	50.7472	38.338	49.0625	44.0486	118.986	77.8857	107.493	183.837	196.769	150.865	Psmc3	PRS6A_RAT	26S protease regulatory subunit 6A OS=Rattus norvegicus GN=Psmc3 PE=2 SV=1	tr|A0A0L0CM06|A0A0L0CM06_LUCCU	Uncharacterized protein OS=Lucilia cuprina GN=FF38_04312 PE=3 SV=1	IPR003959:ATPase, AAA-type, core	GO:0036402	proteasome-activating ATPase activity	path:ko03050,path:ko05169	Proteasome|Epstein-Barr virus infection
evm.model.Contig144.59	189.271	153.535	154.339	79.9818	92.4656	135.852	139.659	226.235	220.901	86.1319	83.129	88.6546	166.64	173.449	150.135	Surf4	SURF4_DROME	Surfeit locus protein 4 homolog OS=Drosophila melanogaster GN=Surf4 PE=2 SV=1	tr|A0A1L8E8D6|A0A1L8E8D6_HAEIR	Putative cargo transport protein erv29 OS=Haematobia irritans PE=4 SV=1	IPR002995:Surfeit locus 4	GO:0016021	integral component of membrane
evm.model.Contig105.16	1611.58	1918.38	1609.93	5008.16	4546.09	3398.81	4066.44	2912.16	3272.25	2824.36	5143.79	2323.73	343.256	367.939	149.972	up	TNNT_DROME	Troponin T, skeletal muscle OS=Drosophila melanogaster GN=up PE=1 SV=3	tr|A0A1I8MYM8|A0A1I8MYM8_MUSDO	Uncharacterized protein OS=Musca domestica GN=101894605 PE=4 SV=1	IPR027707:Troponin T	GO:0005861	troponin complex
evm.model.Contig83.40	467.422	463.8	485.696	178.34	207.72	199.149	140.687	146.965	147.299	128.355	95.6831	103.41	163.775	140.338	149.705	eIF3-S6	EIF3E_DROSI	Eukaryotic translation initiation factor 3 subunit E OS=Drosophila simulans GN=eIF3-S6 PE=3 SV=1	tr|A0A0L0C7H4|A0A0L0C7H4_LUCCU	Eukaryotic translation initiation factor 3 subunit E OS=Lucilia cuprina GN=FF38_07530 PE=3 SV=1	IPR000717:Proteasome component (PCI) domain	GO:0003743	translation initiation factor activity	path:ko03013,path:ko05160	RNA transport|Hepatitis C
evm.model.Contig45.187	793.698	699.992	799.37	684.842	707.288	625.788	941.957	1053.97	1029.14	275.569	312.501	259.94	151.371	183.037	149.115	Echs1	ECHM_MOUSE	Enoyl-CoA hydratase, mitochondrial OS=Mus musculus GN=Echs1 PE=1 SV=1	tr|T1PAX8|T1PAX8_MUSDO	Enoyl-CoA hydratase/isomerase OS=Musca domestica PE=2 SV=1	IPR001753:Crotonase superfamily	GO:0003824	catalytic activity	path:ko00062,path:ko00071,path:ko00280,path:ko00310,path:ko00380,path:ko00410,path:ko00627,path:ko00640,path:ko00650,path:ko00930	Fatty acid elongation|Fatty acid degradation|Valine, leucine and isoleucine degradation|Lysine degradation|Tryptophan metabolism|beta-Alanine metabolism|Aminobenzoate degradation|Propanoate metabolism|Butanoate metabolism|Caprolactam degradation
evm.model.Contig17.78	38.0807	31.8252	37.187	24.7229	21.4108	20.6613	50.7669	59.2595	54.9612	143.662	49.5927	120.863	193.293	119.929	149.066	Lrrc15	LRC15_MOUSE	Leucine-rich repeat-containing protein 15 OS=Mus musculus GN=Lrrc15 PE=2 SV=1	tr|A0A0L0BSE9|A0A0L0BSE9_LUCCU	Uncharacterized protein (Fragment) OS=Lucilia cuprina GN=FF38_07945 PE=4 SV=1	IPR003591:Leucine-rich repeat, typical subtype	GO:0005515	protein binding
evm.model.Contig90.104	0.350373	0.263399	0.760621	0.0401345	0.394698	0.161648	1.3019	5.47487	0.333471	46.9873	8.93738	41.1771	100.521	104.331	149.018	FIBCD1	FBCD1_MACFA	Fibrinogen C domain-containing protein 1 OS=Macaca fascicularis GN=FIBCD1 PE=2 SV=1	tr|A0A0L0BN92|A0A0L0BN92_LUCCU	Uncharacterized protein OS=Lucilia cuprina GN=FF38_05880 PE=4 SV=1	IPR002181:Fibrinogen, alpha/beta/gamma chain, C-terminal globular domain
evm.model.Contig4.156	15.3666	16.2677	14.4429	20.7462	18.4615	12.7546	9.17279	7.65272	7.3547	53.2581	46.289	53.6774	195.525	284.584	148.025	betaTub60D	TBB3_DROME	Tubulin beta-3 chain OS=Drosophila melanogaster GN=betaTub60D PE=2 SV=2	tr|A0A1B0G7V4|A0A1B0G7V4_GLOMM	Tubulin beta chain OS=Glossina morsitans morsitans PE=3 SV=1	IPR000217:Tubulin	GO:0005200	structural constituent of cytoskeleton	path:ko04145,path:ko04540,path:ko05130	Phagosome|Gap junction|Pathogenic Escherichia coli infection
evm.model.Contig11.327	96.7694	88.6047	94.7524	127.001	108.735	92.2831	253.483	193.769	216.126	342.361	149.939	295.107	164.424	149.998	148.007	HADHA	ECHA_PIG	Trifunctional enzyme subunit alpha, mitochondrial OS=Sus scrofa GN=HADHA PE=1 SV=1	tr|A0A0L0C606|A0A0L0C606_LUCCU	Uncharacterized protein OS=Lucilia cuprina GN=FF38_08075 PE=3 SV=1	IPR001753:Crotonase superfamily	GO:0003857	3-hydroxyacyl-CoA dehydrogenase activity	path:ko00062,path:ko00071,path:ko00280,path:ko00310,path:ko00380,path:ko00410,path:ko00627,path:ko00640,path:ko00650,path:ko00930,path:ko01040	Fatty acid elongation|Fatty acid degradation|Valine, leucine and isoleucine degradation|Lysine degradation|Tryptophan metabolism|beta-Alanine metabolism|Aminobenzoate degradation|Propanoate metabolism|Butanoate metabolism|Caprolactam degradation|Biosynthesis of unsaturated fatty acids
evm.model.Contig14.243	19.0389	18.2854	18.0235	21.8599	20.396	19.7013	18.6049	19.0323	17.9842	57.9425	39.6565	55.9833	165.251	163.441	147.756				tr|A0A0L0CJ23|A0A0L0CJ23_LUCCU	Uncharacterized protein OS=Lucilia cuprina GN=FF38_03703 PE=4 SV=1	IPR000626:Ubiquitin domain	GO:0005515	protein binding
evm.model.Contig6.744	393.711	405.8	371.397	222.65	255.563	241.054	193.645	190.205	177.901	133.31	96.2835	112.102	153.318	140.259	146.546	eIF-5A	IF5A_SPOFR	Eukaryotic translation initiation factor 5A OS=Spodoptera frugiperda GN=eIF-5A PE=2 SV=1	tr|A0A0L0CBA1|A0A0L0CBA1_LUCCU	Uncharacterized protein OS=Lucilia cuprina GN=FF38_11489 PE=4 SV=1	IPR020189:Translation elongation factor, IF5A C-terminal	GO:0005515	protein binding
evm.model.Contig130.34	928.168	803.095	840.449	716.323	671.341	683.674	823.473	807.525	819.046	206.643	368.59	160.291	172.684	165.073	146.176	ATPsynCf6	ATP5J_DROME	ATP synthase-coupling factor 6, mitochondrial OS=Drosophila melanogaster GN=ATPsynCf6 PE=3 SV=1	tr|A0A1I8N887|A0A1I8N887_MUSDO	Uncharacterized protein OS=Musca domestica GN=101898826 PE=4 SV=1	IPR008387:ATP synthase-coupling factor 6, mitochondrial	GO:0000276	mitochondrial proton-transporting ATP synthase complex, coupling factor F(o)	path:ko00190,path:ko04714,path:ko05010,path:ko05012,path:ko05016	Oxidative phosphorylation|Thermogenesis|Alzheimer's disease|Parkinson's disease|Huntington's disease
evm.model.Contig150.17	10.4565	8.4589	8.42954	5.62811	6.03272	7.14758	6.64794	12.9658	9.72741	41.8793	18.8234	49.0134	242.022	241.603	145.682				tr|A0A1I8N4K1|A0A1I8N4K1_MUSDO	Uncharacterized protein OS=Musca domestica GN=101895184 PE=4 SV=1	IPR031632:Small VCP/p97-interacting protein			path:ko04141	Protein processing in endoplasmic reticulum
evm.model.Contig5.489	114.708	110.112	122.598	85.6246	85.0291	70.0134	83.864	88.9114	77.74	156.335	135.162	132.36	149.107	147.705	145.368	Pp1alpha-96A	PP11_DROME	Serine/threonine-protein phosphatase alpha-1 isoform OS=Drosophila melanogaster GN=Pp1alpha-96A PE=1 SV=1	tr|A0A0L0CK08|A0A0L0CK08_LUCCU	Serine/threonine-protein phosphatase OS=Lucilia cuprina GN=FF38_12430 PE=3 SV=1	IPR004843:Calcineurin-like phosphoesterase domain, ApaH type	GO:0016787	hydrolase activity	path:ko03015,path:ko04022,path:ko04024,path:ko04113,path:ko04114,path:ko04218,path:ko04261,path:ko04270,path:ko04390,path:ko04510,path:ko04611,path:ko04720,path:ko04728,path:ko04750,path:ko04810,path:ko04910,path:ko04921,path:ko04931,path:ko05031,path:ko05034,path:ko05168,path:ko05205	mRNA surveillance pathway|cGMP-PKG signaling pathway|cAMP signaling pathway|Meiosis - yeast|Oocyte meiosis|Cellular senescence|Adrenergic signaling in cardiomyocytes|Vascular smooth muscle contraction|Hippo signaling pathway|Focal adhesion|Platelet activation|Long-term potentiation|Dopaminergic synapse|Inflammatory mediator regulation of TRP channels|Regulation of actin cytoskeleton|Insulin signa…
evm.model.Contig18.123	0.630051	0	0	0	0	0	0	0	0	1.25668	0	0	79.6889	472.232	145.167	COL28A1	ISC1_BOMMO	Chymotrypsin inhibitor SCI-I OS=Bombyx mori PE=1 SV=1	tr|A0A0L0BPS6|A0A0L0BPS6_LUCCU	Uncharacterized protein OS=Lucilia cuprina GN=FF38_12144 PE=4 SV=1	IPR002223:Pancreatic trypsin inhibitor Kunitz domain	GO:0004867	serine-type endopeptidase inhibitor activity
evm.model.Contig6.183	6718.14	8359.98	7258.56	13115.5	12687	8897.92	14960.4	10975.4	11906.5	4759.5	11715.8	3634.06	261.051	226.013	144.328	Act57B	ACT3_DROME	Actin-57B OS=Drosophila melanogaster GN=Act57B PE=1 SV=1	tr|A0A1A9XJA3|A0A1A9XJA3_GLOFF	Uncharacterized protein OS=Glossina fuscipes fuscipes PE=3 SV=1	IPR004000:Actin family			path:ko04015,path:ko04145,path:ko04210,path:ko04390,path:ko04391,path:ko04510,path:ko04520,path:ko04530,path:ko04611,path:ko04670,path:ko04714,path:ko04745,path:ko04810,path:ko04919,path:ko04921,path:ko05100,path:ko05110,path:ko05130,path:ko05131,path:ko05132,path:ko05164,path:ko05205,path:ko05225,path:ko05410,path:ko05412,path:ko05414,path:ko05416,path:ko05418	Rap1 signaling pathway|Phagosome|Apoptosis|Hippo signaling pathway|Hippo signaling pathway - fly|Focal adhesion|Adherens junction|Tight junction|Platelet activation|Leukocyte transendothelial migration|Thermogenesis|Phototransduction - fly|Regulation of actin cytoskeleton|Thyroid hormone signaling pathway|Oxytocin signaling pathway|Bacterial invasion of epithelial cells|Vibrio cholerae infection|…
evm.model.Contig44.15	17.9499	19.4845	20.9718	61.0607	52.1228	67.206	69.7593	59.055	60.4852	13.5338	12.0491	8.45164	196.174	143.861	144.21	MMEL1	MMEL1_HUMAN	Membrane metallo-endopeptidase-like 1 OS=Homo sapiens GN=MMEL1 PE=2 SV=2	tr|A0A0L0CLG4|A0A0L0CLG4_LUCCU	Uncharacterized protein OS=Lucilia cuprina GN=FF38_13123 PE=4 SV=1	IPR008753:Peptidase M13, N-terminal domain	GO:0004222	metalloendopeptidase activity
evm.model.Contig6.879	409.306	407.262	446.904	281.448	328.629	291.989	188.161	225.404	183.87	94.5596	89.4812	71.3736	149.062	154.663	143.568	CCT5	TCPE_MACFA	T-complex protein 1 subunit epsilon OS=Macaca fascicularis GN=CCT5 PE=2 SV=1	tr|A0A0L0CF33|A0A0L0CF33_LUCCU	Uncharacterized protein OS=Lucilia cuprina GN=FF38_01579 PE=3 SV=1	IPR012718:T-complex protein 1, epsilon subunit	GO:0005524	ATP binding
evm.model.Contig1.940	221.417	223.489	189.009	339.414	333.702	281.577	211.973	245.625	326.183	222.07	356.4	141.703	166.028	160.045	143.328	Pgk	PGK_DROME	Phosphoglycerate kinase OS=Drosophila melanogaster GN=Pgk PE=2 SV=2	tr|A0A0L0C8V6|A0A0L0C8V6_LUCCU	Phosphoglycerate kinase OS=Lucilia cuprina GN=FF38_10490 PE=3 SV=1	IPR001576:Phosphoglycerate kinase	GO:0004618	phosphoglycerate kinase activity	path:ko00010,path:ko00710	Glycolysis / Gluconeogenesis|Carbon fixation in photosynthetic organisms
evm.model.Contig74.71	0	1.17058	1.04441	0.692593	2.76766	1.72656	89.2939	66.7187	107.043	195.226	267.883	310.541	151.873	94.4044	143.209				tr|A0A0L0C6Y3|A0A0L0C6Y3_LUCCU	Uncharacterized protein OS=Lucilia cuprina GN=FF38_04347 PE=4 SV=1	IPR029277:Single domain Von Willebrand factor type C domain
evm.model.Contig77.52	290.094	318.716	360.432	155.383	178.689	143.824	62.8481	122.05	82.051	121.91	102.585	94.9642	130.977	130.748	143.177	Hrb98DE	ROA1_DROME	Heterogeneous nuclear ribonucleoprotein A1 OS=Drosophila melanogaster GN=Hrb98DE PE=2 SV=1	tr|A0A0L0BY69|A0A0L0BY69_LUCCU	Heterogeneous nuclear ribonucleoprotein A1 OS=Lucilia cuprina GN=FF38_11849 PE=4 SV=1	IPR000504:RNA recognition motif domain	GO:0003676	nucleic acid binding	path:ko03040	Spliceosome
evm.model.Contig7.47	119.37	100.565	115.355	32.9534	41.711	49.3557	71.6028	126.194	161.662	61.4615	51.4658	54.3142	175.186	143.702	143.133	Hm13	HM13_MOUSE	Minor histocompatibility antigen H13 OS=Mus musculus GN=Hm13 PE=1 SV=1	tr|L7NL86|L7NL86_LUCSE	Putative signal peptide protease OS=Lucilia sericata PE=2 SV=1	IPR006639:Presenilin/signal peptide peptidase	GO:0004190	aspartic-type endopeptidase activity
evm.model.Contig24.31	388.222	361.384	374.792	168.127	209.415	211.223	107.782	156.634	145.346	90.913	76.0634	84.2108	135.91	135.195	142.778	eIF-2beta	IF2B_DROME	Eukaryotic translation initiation factor 2 subunit 2 OS=Drosophila melanogaster GN=eIF-2beta PE=1 SV=1	tr|A0A0L0CLE5|A0A0L0CLE5_LUCCU	Eukaryotic translation initiation factor 2 subunit 2 OS=Lucilia cuprina GN=FF38_07154 PE=4 SV=1	IPR002735:Translation initiation factor IF2/IF5	GO:0003743	translation initiation factor activity	path:ko03013	RNA transport
evm.model.Contig38.6	53.8031	52.5626	49.2623	42.3157	49.1559	50.2406	41.6226	47.8551	51.2087	110.115	72.8407	98.6582	144.911	159.389	142.437	Rpn8	PSMD7_DROME	26S proteasome non-ATPase regulatory subunit 7 OS=Drosophila melanogaster GN=Rpn8 PE=1 SV=6	tr|A0A0L0BP15|A0A0L0BP15_LUCCU	26S proteasome non-ATPase regulatory subunit 7 OS=Lucilia cuprina GN=FF38_03221 PE=4 SV=1	IPR000555:JAB1/MPN/MOV34 metalloenzyme domain	GO:0005515	protein binding	path:ko03050,path:ko05169	Proteasome|Epstein-Barr virus infection
evm.model.Contig79.28	356.049	367.702	451.518	117.79	151.25	111.506	106.745	151.399	78.8599	206.618	109.469	194.56	123.405	105.279	142.405	Rm62	DDX17_DROME	ATP-dependent RNA helicase p62 OS=Drosophila melanogaster GN=Rm62 PE=1 SV=3	tr|A0A0L0C0S8|A0A0L0C0S8_LUCCU	ATP-dependent RNA helicase p62 OS=Lucilia cuprina GN=FF38_11837 PE=3 SV=1	IPR011545:DEAD/DEAH box helicase domain	GO:0003676	nucleic acid binding	path:ko03040,path:ko05202,path:ko05205	Spliceosome|Transcriptional misregulation in cancer|Proteoglycans in cancer
evm.model.Contig95.69	113.505	109.535	110.702	77.4492	77.3119	75.167	55.1841	58.7472	55.6074	122.668	94.5019	115.797	145.664	145.408	141.668	CkIalpha	KC1A_DROME	Casein kinase I isoform alpha OS=Drosophila melanogaster GN=CkIalpha PE=1 SV=1	tr|A0A0L0BL81|A0A0L0BL81_LUCCU	Casein kinase I isoform alpha OS=Lucilia cuprina GN=FF38_00102 PE=3 SV=1	IPR000719:Protein kinase domain	GO:0004672	protein kinase activity	path:ko04310,path:ko04340,path:ko04341,path:ko05165,path:ko05224,path:ko05225,path:ko05226	Wnt signaling pathway|Hedgehog signaling pathway|Hedgehog signaling pathway - fly|Human papillomavirus infection|Breast cancer|Hepatocellular carcinoma|Gastric cancer
evm.model.Contig83.14	421.722	390.646	438.174	163.091	209.889	205.795	100.583	183.181	138.859	121.161	95.7226	124.571	138.621	122.606	141.226	Pa2g4	PA2G4_MOUSE	Proliferation-associated protein 2G4 OS=Mus musculus GN=Pa2g4 PE=1 SV=3	tr|A0A0L0BPR0|A0A0L0BPR0_LUCCU	Uncharacterized protein OS=Lucilia cuprina GN=FF38_10989 PE=4 SV=1	IPR000994:Peptidase M24
evm.model.Contig12.315	70.9196	47.8176	58.0851	9.49299	14.6376	12.5115	75.8265	133.784	122.81	35.8664	24.615	40.5369	132.471	122.838	141.183	DDO	OXDD_BOVIN	D-aspartate oxidase OS=Bos taurus GN=DDO PE=1 SV=2	tr|A0A0L0CC52|A0A0L0CC52_LUCCU	Uncharacterized protein OS=Lucilia cuprina GN=FF38_01743 PE=4 SV=1	IPR023209:D-amino-acid oxidase	GO:0003884	D-amino-acid oxidase activity	path:ko00250,path:ko04146	Alanine, aspartate and glutamate metabolism|Peroxisome
evm.model.Contig105.36	2.14818	6.6734	3.59762	11.9219	14.3266	20.5667	23.2271	25.4795	15.677	40.4935	41.6575	72.5584	182.376	193.15	140.918				tr|A0A0L0BKV7|A0A0L0BKV7_LUCCU	Uncharacterized protein (Fragment) OS=Lucilia cuprina GN=FF38_07731 PE=4 SV=1	IPR002557:Chitin binding domain	GO:0005576	extracellular region
evm.model.Contig106.77	228.261	230.833	295.483	86.5769	105.455	104.06	221.345	359.15	339.659	114.259	71.5182	104.801	144.247	141.194	140.765	HDLBP	VIGLN_HUMAN	Vigilin OS=Homo sapiens GN=HDLBP PE=1 SV=2	tr|A0A1I8N712|A0A1I8N712_MUSDO	Uncharacterized protein OS=Musca domestica GN=101897944 PE=4 SV=1	IPR004087:K Homology domain	GO:0003723	RNA binding
evm.model.Contig15.182	476.657	360.387	459.275	93.8071	103.554	109.179	420.148	696.629	650.754	185.895	151.252	189.062	156.925	151.666	140.541	Vha26	VATE_DROME	V-type proton ATPase subunit E OS=Drosophila melanogaster GN=Vha26 PE=2 SV=1	tr|A0A1L8EH52|A0A1L8EH52_HAEIR	Putative vacuolar h+-atpase v1 sector subunit e OS=Haematobia irritans PE=3 SV=1	IPR002842:ATPase, V1/A1 complex, subunit E	GO:0015991	ATP hydrolysis coupled proton transport	path:ko00190,path:ko04145,path:ko04150,path:ko04721,path:ko04966,path:ko05110,path:ko05120,path:ko05323	Oxidative phosphorylation|Phagosome|mTOR signaling pathway|Synaptic vesicle cycle|Collecting duct acid secretion|Vibrio cholerae infection|Epithelial cell signaling in Helicobacter pylori infection|Rheumatoid arthritis
evm.model.Contig14.364	394.178	382.402	377.436	449.759	436.885	372.559	504.133	530.048	508.904	176.35	235.213	162.741	183.634	118.268	140.38	fh	FUMH_DANRE	Fumarate hydratase, mitochondrial OS=Danio rerio GN=fh PE=2 SV=1	tr|T1PF85|T1PF85_MUSDO	Lyase OS=Musca domestica GN=101897600 PE=2 SV=1	IPR000362:Fumarate lyase family	GO:0004333	fumarate hydratase activity	path:ko00020,path:ko00620,path:ko00720,path:ko04934,path:ko05200,path:ko05211	Citrate cycle (TCA cycle)|Pyruvate metabolism|Carbon fixation pathways in prokaryotes|Cushing's syndrome|Pathways in cancer|Renal cell carcinoma
evm.model.Contig7.458	132.72	131.093	140.76	89.1849	95.3111	81.5422	107.265	116.515	107.961	141.91	125.635	120.992	133.416	146.573	139.587	mts	PP2A_DROME	Serine/threonine-protein phosphatase PP2A OS=Drosophila melanogaster GN=mts PE=2 SV=1	tr|A0A0L0CFY6|A0A0L0CFY6_LUCCU	Serine/threonine-protein phosphatase OS=Lucilia cuprina GN=FF38_14304 PE=3 SV=1	IPR004843:Calcineurin-like phosphoesterase domain, ApaH type	GO:0016787	hydrolase activity	path:ko03015,path:ko04013,path:ko04071,path:ko04111,path:ko04113,path:ko04114,path:ko04136,path:ko04138,path:ko04140,path:ko04151,path:ko04152,path:ko04261,path:ko04350,path:ko04390,path:ko04391,path:ko04530,path:ko04728,path:ko04730,path:ko05142,path:ko05160,path:ko05165	mRNA surveillance pathway|MAPK signaling pathway - fly|Sphingolipid signaling pathway|Cell cycle - yeast|Meiosis - yeast|Oocyte meiosis|Autophagy - other|Autophagy - yeast|Autophagy - animal|PI3K-Akt signaling pathway|AMPK signaling pathway|Adrenergic signaling in cardiomyocytes|TGF-beta signaling pathway|Hippo signaling pathway|Hippo signaling pathway - fly|Tight junction|Dopaminergic synapse|Lo…
evm.model.Contig12.256	3.77917	3.80357	3.48716	1.34781	1.23519	0.702629	2.92935	1.55074	2.84226	92.9696	46.9898	87.8004	140.045	171.061	138.595				tr|A0A0L0BR64|A0A0L0BR64_LUCCU	Uncharacterized protein OS=Lucilia cuprina GN=FF38_13575 PE=4 SV=1
evm.model.Contig35.118	6.0513	7.27948	6.87053	6.27182	6.92326	5.01275	7.46339	5.77113	5.7775	18.5714	12.9638	10.7883	154.712	123.622	138.407				tr|A0A0L0CFC0|A0A0L0CFC0_LUCCU	Uncharacterized protein OS=Lucilia cuprina GN=FF38_06929 PE=4 SV=1
evm.model.Contig196.16	31.3226	32.5282	32.9175	34.0225	35.9158	32.9877	35.1603	38.0383	39.5253	92.5544	62.5286	97.3313	158.696	162.976	138.197	Rpn13	ADRM1_DROME	Proteasomal ubiquitin receptor ADRM1 homolog OS=Drosophila melanogaster GN=Rpn13 PE=1 SV=1	tr|A0A0L0C640|A0A0L0C640_LUCCU	Putative proteasomal ubiquitin receptor ADRM1 (Fragment) OS=Lucilia cuprina GN=FF38_11347 PE=4 SV=1	IPR006773:26S proteasome complex ubiquitin receptor, subunit Rpn13	GO:0005634	nucleus
evm.model.Contig144.58	610.927	573.864	592.4	593.507	602.147	514.308	741.227	792.948	791.374	266.916	379.872	212.226	153.704	142.532	137.876	ATPsyngamma	ATPG_DROME	ATP synthase subunit gamma, mitochondrial OS=Drosophila melanogaster GN=ATPsyngamma PE=2 SV=2	tr|A0A0L0C3Z3|A0A0L0C3Z3_LUCCU	ATP synthase subunit gamma OS=Lucilia cuprina GN=FF38_05384 PE=3 SV=1	IPR000131:ATP synthase, F1 complex, gamma subunit	GO:0015986	ATP synthesis coupled proton transport	path:ko00190,path:ko04714,path:ko05010,path:ko05012,path:ko05016	Oxidative phosphorylation|Thermogenesis|Alzheimer's disease|Parkinson's disease|Huntington's disease
evm.model.Contig1.943	122.516	100.89	115.984	69.8979	83.4788	81.851	72.3793	101.144	95.6415	192.272	148.301	136.815	122.313	88.458	137.858	GOT2	AATM_HUMAN	Aspartate aminotransferase, mitochondrial OS=Homo sapiens GN=GOT2 PE=1 SV=3	tr|A0A0L0C559|A0A0L0C559_LUCCU	Phosphoglycerate kinase OS=Lucilia cuprina GN=FF38_10489 PE=3 SV=1	IPR000796:Aspartate/other aminotransferase	GO:0009058	biosynthetic process	path:ko00220,path:ko00250,path:ko00270,path:ko00330,path:ko00350,path:ko00360,path:ko00400,path:ko00710,path:ko00950,path:ko00960,path:ko04975	Arginine biosynthesis|Alanine, aspartate and glutamate metabolism|Cysteine and methionine metabolism|Arginine and proline metabolism|Tyrosine metabolism|Phenylalanine metabolism|Phenylalanine, tyrosine and tryptophan biosynthesis|Carbon fixation in photosynthetic organisms|Isoquinoline alkaloid biosynthesis|Tropane, piperidine and pyridine alkaloid biosynthesis|Fat digestion and absorption
evm.model.Contig19.106	10.603	9.66603	9.9105	9.46649	7.72457	9.06273	9.62602	13.0588	12.2751	114.009	50.3307	89.3162	133.497	138.725	137.697	Plcg1	HGLY_MANSE	27 kDa hemolymph glycoprotein OS=Manduca sexta PE=1 SV=1	tr|A0A0L0BQV0|A0A0L0BQV0_LUCCU	Uncharacterized protein OS=Lucilia cuprina GN=FF38_13426 PE=4 SV=1	IPR009832:Protein of unknown function DUF1397
evm.model.Contig6.197	433.757	356.322	403.056	92.179	133.916	119.568	510.64	598.622	585.726	198.179	110.246	164.085	133.971	151.09	137.587				tr|A0A1L8EEU0|A0A1L8EEU0_HAEIR	Putative vacuolar h+-atpase v0 sector accessory subunit s1 ac45 OS=Haematobia irritans PE=4 SV=1	IPR008388:ATPase, V1 complex, subunit S1	GO:0015991	ATP hydrolysis coupled proton transport	path:ko00190,path:ko04142,path:ko04145,path:ko05110,path:ko05120,path:ko05152,path:ko05161,path:ko05323	Oxidative phosphorylation|Lysosome|Phagosome|Vibrio cholerae infection|Epithelial cell signaling in Helicobacter pylori infection|Tuberculosis|Hepatitis B|Rheumatoid arthritis
evm.model.Contig83.56	753.715	620.624	630.097	649.504	853.606	803.367	665.313	740.23	780.632	227.517	349.476	194.861	167.166	145.013	137.081	Uqcrq	QCR8_MOUSE	Cytochrome b-c1 complex subunit 8 OS=Mus musculus GN=Uqcrq PE=1 SV=3	tr|A0A0L0BV84|A0A0L0BV84_LUCCU	Uncharacterized protein OS=Lucilia cuprina GN=FF38_07422 PE=4 SV=1	IPR004205:Cytochrome b-c1 complex subunit 8	GO:0008121	ubiquinol-cytochrome-c reductase activity	path:ko00190,path:ko04260,path:ko04714,path:ko04932,path:ko05010,path:ko05012,path:ko05016	Oxidative phosphorylation|Cardiac muscle contraction|Thermogenesis|Non-alcoholic fatty liver disease (NAFLD)|Alzheimer's disease|Parkinson's disease|Huntington's disease
evm.model.Contig3.899	14.0128	15.4927	11.9142	25.7557	25.6367	21.5783	20.2821	19.3798	23.3071	64.1538	65.2845	88.9841	126.628	166.455	136.756	Uch	UCHL_DROME	Ubiquitin carboxyl-terminal hydrolase OS=Drosophila melanogaster GN=Uch PE=2 SV=2	tr|A0A1I8P8K9|A0A1I8P8K9_STOCA	Ubiquitin carboxyl-terminal hydrolase OS=Stomoxys calcitrans GN=106084094 PE=3 SV=1	IPR001578:Peptidase C12, ubiquitin carboxyl-terminal hydrolase	GO:0004843	thiol-dependent ubiquitin-specific protease activity
evm.model.Contig77.58	15.5799	25.68	26.9414	6.61014	8.37845	4.39876	68.1411	21.5576	27.7007	311.157	16.0459	362.071	90.4683	23.3681	136.661
evm.model.Contig73.62	158.706	160.94	168.44	60.3015	63.4084	66.3233	95.1218	107.791	107.297	147.701	106.412	119.791	152.624	141.079	136.618	XBP1	XBP1_BOVIN	X-box-binding protein 1 OS=Bos taurus GN=XBP1 PE=2 SV=1	tr|A0A0L0BZL5|A0A0L0BZL5_LUCCU	Uncharacterized protein OS=Lucilia cuprina GN=FF38_11215 PE=4 SV=1	IPR004827:Basic-leucine zipper domain	GO:0003700	transcription factor activity, sequence-specific DNA binding	path:ko04141,path:ko04932,path:ko05166	Protein processing in endoplasmic reticulum|Non-alcoholic fatty liver disease (NAFLD)|HTLV-I infection
evm.model.Contig46.156	5.06909	3.65572	5.39136	11.6879	11.7753	5.59248	17.1283	15.1642	15.6498	40.2768	23.3442	24.7973	130.787	114.325	136.46	sn	SING_DROME	Protein singed OS=Drosophila melanogaster GN=sn PE=3 SV=1	tr|A0A0L0CIE3|A0A0L0CIE3_LUCCU	Fascin OS=Lucilia cuprina GN=FF38_12360 PE=3 SV=1	IPR010431:Fascin	GO:0030674	protein binding, bridging
evm.model.Contig23.156	157.193	164.464	177.671	57.6357	74.8791	50.4738	26.5572	35.3696	26.7783	79.329	95.8208	45.6536	95.9262	103.332	136.424	SLC3A2	4F2_RABIT	4F2 cell-surface antigen heavy chain OS=Oryctolagus cuniculus GN=SLC3A2 PE=1 SV=2	tr|A0A0L0CEP8|A0A0L0CEP8_LUCCU	Uncharacterized protein OS=Lucilia cuprina GN=FF38_11693 PE=4 SV=1	IPR031984:Solute carrier family 3 member 2, N-terminal domain	GO:0003824	catalytic activity	path:ko04150,path:ko04216,path:ko04974	mTOR signaling pathway|Ferroptosis|Protein digestion and absorption
evm.model.Contig1.914	111.432	90.7399	92.2979	173.736	170.044	139.407	229.776	275.327	276.514	144.709	137.812	120.875	138.546	153.286	136.409	OV16	OV16_ONCVO	OV-16 antigen OS=Onchocerca volvulus GN=OV16 PE=2 SV=2	tr|A0A0L0C611|A0A0L0C611_LUCCU	Uncharacterized protein OS=Lucilia cuprina GN=FF38_12500 PE=4 SV=1	IPR008914:Phosphatidylethanolamine-binding protein
evm.model.Contig116.34	22.369	16.486	18.1028	2.89914	3.32274	2.5812	50.3947	50.869	74.1168	91.7038	39.3937	94.5167	135.377	118.869	136.071	LRRC58	LRC58_HUMAN	Leucine-rich repeat-containing protein 58 OS=Homo sapiens GN=LRRC58 PE=1 SV=2	tr|A0A0L0BYP7|A0A0L0BYP7_LUCCU	Uncharacterized protein OS=Lucilia cuprina GN=FF38_08230 PE=4 SV=1	IPR003591:Leucine-rich repeat, typical subtype	GO:0005515	protein binding
evm.model.Contig8.339	1056.6	871.913	789.949	811.785	873.19	777.732	833.732	840.276	821.593	240.999	429.101	187.7	186.398	141.264	135.805	Atp5i	ATP5I_MOUSE	ATP synthase subunit e, mitochondrial OS=Mus musculus GN=Atp5i PE=1 SV=2	tr|A0A0L0BL60|A0A0L0BL60_LUCCU	Uncharacterized protein OS=Lucilia cuprina GN=FF38_04426 PE=4 SV=1	IPR008386:ATP synthase, F0 complex, subunit E, mitochondrial	GO:0000276	mitochondrial proton-transporting ATP synthase complex, coupling factor F(o)	path:ko00190,path:ko04714	Oxidative phosphorylation|Thermogenesis
evm.model.Contig101.35	102.047	57.9042	92.8671	12.4352	19.693	19.7366	121.135	167.24	170.62	359.08	86.1379	425.471	121.98	119.672	135.271	Litaf	LITAF_MOUSE	Lipopolysaccharide-induced tumor necrosis factor-alpha factor homolog OS=Mus musculus GN=Litaf PE=1 SV=1	tr|A0A0L0BLG2|A0A0L0BLG2_LUCCU	Uncharacterized protein OS=Lucilia cuprina GN=FF38_13025 PE=4 SV=1	IPR006629:LPS-induced tumour necrosis factor alpha factor
evm.model.Contig1.732	45.0776	42.4145	38.6357	43.7966	43.5761	42.1021	54.5762	51.7079	65.987	80.2924	61.7119	83.7306	154.344	146.717	135.005	cpb	CAPZB_DROME	F-actin-capping protein subunit beta OS=Drosophila melanogaster GN=cpb PE=2 SV=1	tr|A0A0L0C715|A0A0L0C715_LUCCU	F-actin-capping protein subunit beta OS=Lucilia cuprina GN=FF38_06826 PE=4 SV=1	IPR001698:F-actin-capping protein subunit beta	GO:0008290	F-actin capping protein complex	path:ko04144	Endocytosis
evm.model.Contig63.42	71.884	75.4895	46.6248	12.231	18.437	33.2346	342.18	59.95	215.882	118.706	96.8615	218.544	109.499	159.367	134.92				tr|A0A1I8MNP5|A0A1I8MNP5_MUSDO	Uncharacterized protein OS=Musca domestica GN=101901240 PE=4 SV=1	IPR000182:GNAT domain	GO:0008080	N-acetyltransferase activity
evm.model.Contig23.131	88.587	74.7762	82.635	74.4427	72.0842	55.8475	110.524	120.816	124.337	110.29	57.5042	95.5913	184.805	179.666	134.918	SLC25A11	M2OM_HUMAN	Mitochondrial 2-oxoglutarate/malate carrier protein OS=Homo sapiens GN=SLC25A11 PE=1 SV=3	tr|A0A0L0CED9|A0A0L0CED9_LUCCU	Uncharacterized protein OS=Lucilia cuprina GN=FF38_11668 PE=3 SV=1	IPR018108:Mitochondrial substrate/solute carrier
evm.model.Contig5.61	455.183	434.08	520.432	189.048	254.483	224.137	91.5428	182.389	143.535	123.082	71.0904	77.799	168.141	136.83	134.886	Tktl2	TKTL2_MOUSE	Transketolase-like protein 2 OS=Mus musculus GN=Tktl2 PE=1 SV=1	tr|A0A0L0BN54|A0A0L0BN54_LUCCU	Uncharacterized protein OS=Lucilia cuprina GN=FF38_05359 PE=4 SV=1	IPR005474:Transketolase, N-terminal			path:ko00030,path:ko00710,path:ko01051	Pentose phosphate pathway|Carbon fixation in photosynthetic organisms|Biosynthesis of ansamycins
evm.model.Contig18.67	10.212	10.9565	12.8637	8.07647	10.5402	6.26622	16.6963	13.2982	16.0007	70.4064	48.2317	58.5271	106.629	150.783	134.518	Reg-5	REG5_DROME	Rhythmically expressed gene 5 protein OS=Drosophila melanogaster GN=Reg-5 PE=2 SV=2	tr|A0A0L0BPK9|A0A0L0BPK9_LUCCU	Rhythmically expressed gene 5 protein OS=Lucilia cuprina GN=FF38_12075 PE=4 SV=1
evm.model.Contig158.20	101.726	100.592	97.4452	102.294	116.936	121.153	94.936	152.065	130.256	91.7044	64.7241	89.7786	113.008	109.719	134.165	Esd	ESTD_RAT	S-formylglutathione hydrolase OS=Rattus norvegicus GN=Esd PE=2 SV=1	tr|A0A0L0C5Z2|A0A0L0C5Z2_LUCCU	S-formylglutathione hydrolase OS=Lucilia cuprina GN=FF38_12993 PE=3 SV=1	IPR014186:S-formylglutathione hydrolase	GO:0018738	S-formylglutathione hydrolase activity	path:ko00680	Methane metabolism
evm.model.Contig131.73	228.326	249.669	287.661	91.0725	105.149	95.0411	107.085	126.12	117.697	124.26	95.7454	114.788	131.755	123.734	134	eIF3-S8	EIF3C_DROPE	Eukaryotic translation initiation factor 3 subunit C OS=Drosophila persimilis GN=eIF3-S8 PE=3 SV=1	tr|A0A0L0CPA2|A0A0L0CPA2_LUCCU	Eukaryotic translation initiation factor 3 subunit C OS=Lucilia cuprina GN=FF38_06471 PE=3 SV=1	IPR000717:Proteasome component (PCI) domain	GO:0005515	protein binding	path:ko03013	RNA transport
evm.model.Contig108.3	15.2873	16.2841	15.5556	19.523	17.4621	14.284	25.6682	24.3601	22.2903	63.9945	64.3713	52.3146	149.524	142.48	133.871	unc-94	TMOD_CAEEL	Tropomodulin OS=Caenorhabditis elegans GN=unc-94 PE=1 SV=2	tr|B4LYN5|B4LYN5_DROVI	Uncharacterized protein, isoform A OS=Drosophila virilis GN=Dvir\GJ24508 PE=4 SV=1	IPR030137:Tropomodulin, invertebrate	GO:0005523	tropomyosin binding
evm.model.Contig133.13	26.0626	29.2262	27.1294	22.9402	20.4195	28.1247	37.7508	36.8468	47.8754	52.5214	32.5478	37.0222	138.324	145.551	133.023	Tret1	TRET1_CULQU	Facilitated trehalose transporter Tret1 OS=Culex quinquefasciatus GN=Tret1 PE=3 SV=1	tr|A0A1I8M2U2|A0A1I8M2U2_MUSDO	Uncharacterized protein OS=Musca domestica GN=101892671 PE=3 SV=1	IPR003663:Sugar/inositol transporter	GO:0016020	membrane
evm.model.Contig189.23	121.61	103.767	109.152	53.8149	62.4589	48.4824	54.965	77.2303	81.1275	346.972	82.9785	334.331	157.988	147.066	132.973				tr|A0A0L0BRP8|A0A0L0BRP8_LUCCU	Uncharacterized protein OS=Lucilia cuprina GN=FF38_05311 PE=3 SV=1	IPR013766:Thioredoxin domain	GO:0045454	cell redox homeostasis	path:ko04141	Protein processing in endoplasmic reticulum
evm.model.Contig72.25	631.463	548.098	511.917	594.099	665.748	576.971	669.242	640.054	602.423	192.137	319.801	143.487	144.528	130.486	132.805				tr|A0A0L0BMY9|A0A0L0BMY9_LUCCU	Uncharacterized protein OS=Lucilia cuprina GN=FF38_08382 PE=4 SV=1	IPR031973:Deltamethrin resistance protein prag01
evm.model.Contig4.184	30.3531	29.7107	30.3256	8.99724	13.1577	10.8357	106.2	129.102	118.081	163.215	88.945	169.517	163.606	181.737	132.647	Spon1	SPON1_RAT	Spondin-1 OS=Rattus norvegicus GN=Spon1 PE=1 SV=1	tr|A0A0L0CJP3|A0A0L0CJP3_LUCCU	Uncharacterized protein OS=Lucilia cuprina GN=FF38_10482 PE=4 SV=1	IPR009465:Spondin, N-terminal	GO:0004867	serine-type endopeptidase inhibitor activity
evm.model.Contig11.404	674.313	636.952	650.56	302.266	338.45	330.386	251.838	242.496	227.267	109.498	83.1631	95.0392	138.08	116.818	132.541	RpS5a	RS5A_DROME	40S ribosomal protein S5a OS=Drosophila melanogaster GN=RpS5a PE=1 SV=1	tr|A0A0L0C5F0|A0A0L0C5F0_LUCCU	Uncharacterized protein OS=Lucilia cuprina GN=FF38_01370 PE=4 SV=1	IPR025605:OST-HTH/LOTUS domain	GO:0005777	peroxisome
evm.model.Contig61.33	566.956	666.774	585.91	888.296	883.761	621.383	1138.78	837.653	926.5	727.712	1369.04	600.145	172.218	158.996	132.369	Mlp84B	MLP2_DROME	Muscle LIM protein Mlp84B OS=Drosophila melanogaster GN=Mlp84B PE=1 SV=1	tr|A0A0L0CNH5|A0A0L0CNH5_LUCCU	Muscle LIM protein Mlp84B OS=Lucilia cuprina GN=FF38_10058 PE=4 SV=1	IPR001781:Zinc finger, LIM-type
evm.model.Contig5.20	1.06465	0	4.32858	3.94015	0.968747	1.46962	625.628	89.9848	446.798	2300.42	3067.74	2385.61	10.8093	203.121	131.08
evm.model.Contig29.144	29.6253	29.3187	30.2187	18.2344	16.902	14.2572	32.8459	27.699	31.0899	127.803	59.7433	99.8638	111.187	90.2871	130.874	Diap1	DIAP1_DROME	Death-associated inhibitor of apoptosis 1 OS=Drosophila melanogaster GN=Diap1 PE=1 SV=2	tr|A0A0L0CRF7|A0A0L0CRF7_LUCCU	Apoptosis 1 inhibitor OS=Lucilia cuprina GN=FF38_06733 PE=4 SV=1	IPR001370:BIR repeat
evm.model.Contig50.40	19.9491	15.0175	16.846	16.9206	16.791	23.9699	48.358	50.2846	67.5964	171.045	104.146	220.51	90.1881	84.1972	130.807	CRYL1	CRYL1_BOVIN	Lambda-crystallin homolog OS=Bos taurus GN=CRYL1 PE=2 SV=3	tr|A0A0L0BUQ1|A0A0L0BUQ1_LUCCU	Uncharacterized protein OS=Lucilia cuprina GN=FF38_13812 PE=4 SV=1	IPR006108:3-hydroxyacyl-CoA dehydrogenase, C-terminal	GO:0003857	3-hydroxyacyl-CoA dehydrogenase activity	path:ko00040	Pentose and glucuronate interconversions
evm.model.Contig37.161	648.754	659.374	708.026	222.403	293.184	273.8	711.954	716.928	729.016	133.17	152.231	142.409	140.19	159.707	129.988	Ahcy13	SAHH_DROME	Adenosylhomocysteinase OS=Drosophila melanogaster GN=Ahcy13 PE=2 SV=2	tr|A0A0L0C832|A0A0L0C832_LUCCU	Adenosylhomocysteinase OS=Lucilia cuprina GN=FF38_02114 PE=3 SV=1	IPR000043:Adenosylhomocysteinase-like			path:ko00270	Cysteine and methionine metabolism
evm.model.Contig181.19	43.1684	46.9199	45.6308	8.86027	46.8864	18.324	69.7857	58.1783	49.7095	0.314977	0.216981	0.21649	51.7233	83.5813	129.894				tr|A0A0L0C9M8|A0A0L0C9M8_LUCCU	Uncharacterized protein OS=Lucilia cuprina GN=FF38_04400 PE=4 SV=1	IPR004302:Cellulose/chitin-binding protein, N-terminal
evm.model.Contig2.284	464.487	449.909	506.357	142.639	153.266	141.41	51.1838	83.6639	61.1739	91.012	64.1613	73.3241	136.73	123.913	129.661	Serbp1	PAIRB_MOUSE	Plasminogen activator inhibitor 1 RNA-binding protein OS=Mus musculus GN=Serbp1 PE=1 SV=2	tr|A0A0L0BNA5|A0A0L0BNA5_LUCCU	Uncharacterized protein OS=Lucilia cuprina GN=FF38_05289 PE=4 SV=1	IPR006861:Hyaluronan/mRNA-binding protein
evm.model.Contig5.197	162.298	164.441	191.209	88.422	94.1907	80.0233	86.1385	112.574	89.2919	144.097	107.89	133.968	130.494	127.516	129.127	Kpna4	IMA3_MOUSE	Importin subunit alpha-3 OS=Mus musculus GN=Kpna4 PE=1 SV=1	tr|T1PAE5|T1PAE5_MUSDO	Importin subunit alpha OS=Musca domestica GN=101890236 PE=2 SV=1	IPR032413:Atypical Arm repeat	GO:0005634	nucleus
evm.model.Contig31.200	110.749	129.203	119.635	59.4964	52.058	52.315	79.3835	39.3887	48.3115	127.348	76.6908	90.6171	151.906	159.791	128.92	Sv2c	SV2C_RAT	Synaptic vesicle glycoprotein 2C OS=Rattus norvegicus GN=Sv2c PE=1 SV=1	tr|A0A0L0BPI8|A0A0L0BPI8_LUCCU	Uncharacterized protein OS=Lucilia cuprina GN=FF38_08362 PE=4 SV=1	IPR020846:Major facilitator superfamily domain	GO:0016021	integral component of membrane	path:ko04512	ECM-receptor interaction
evm.model.Contig61.190	86.1086	83.6999	86.5172	61.9862	69.8217	56.6262	64.5864	75.8281	77.1628	101.033	68.4192	93.2336	120.666	138.26	128.762	TMX1	TMX1_HUMAN	Thioredoxin-related transmembrane protein 1 OS=Homo sapiens GN=TMX1 PE=1 SV=1	tr|A0A0L0BSN0|A0A0L0BSN0_LUCCU	Uncharacterized protein OS=Lucilia cuprina GN=FF38_12173 PE=4 SV=1	IPR013766:Thioredoxin domain	GO:0045454	cell redox homeostasis
evm.model.Contig149.23	325.536	310.22	347.698	122.929	147.789	141.31	129.677	141.078	113.649	117.489	90.9302	100.351	135.652	120.646	128.686	GE20146	EIF3L_DROYA	Eukaryotic translation initiation factor 3 subunit L OS=Drosophila yakuba GN=GE20146 PE=3 SV=1	tr|A0A0L0BKU8|A0A0L0BKU8_LUCCU	Eukaryotic translation initiation factor 3 subunit L OS=Lucilia cuprina GN=FF38_04803 PE=3 SV=1	IPR019382:Translation initiation factor 3 complex subunit L	GO:0003743	translation initiation factor activity
evm.model.Contig7.556	8.86134	4.44513	6.66704	3.82845	5.66211	3.43931	5.75996	2.69016	1.47403	143.694	54.6842	150.527	110.243	128.549	128.661				tr|A0A0L0BX95|A0A0L0BX95_LUCCU	Uncharacterized protein OS=Lucilia cuprina GN=FF38_09651 PE=4 SV=1	IPR002223:Pancreatic trypsin inhibitor Kunitz domain	GO:0004867	serine-type endopeptidase inhibitor activity
evm.model.Contig36.74	129.477	109.185	112.783	161.106	207.822	184.535	174.018	226.144	226.243	172.382	128.921	101.363	178.749	184.488	128.545	HINT1	HINT1_BOVIN	Histidine triad nucleotide-binding protein 1 OS=Bos taurus GN=HINT1 PE=1 SV=2	tr|A0A0L0BSU1|A0A0L0BSU1_LUCCU	Uncharacterized protein OS=Lucilia cuprina GN=FF38_10456 PE=4 SV=1	IPR001310:Histidine triad (HIT) protein	GO:0003824	catalytic activity
evm.model.Contig13.471	8.73308	5.00166	5.79217	3.14262	2.09307	2.0109	1.17907	1.57074	3.64417	14.9479	6.61786	24.0042	196.819	249.408	128.476	gadl1	GADL1_XENTR	Acidic amino acid decarboxylase GADL1 (Fragment) OS=Xenopus tropicalis GN=gadl1 PE=2 SV=2	tr|A0A0L0BWX0|A0A0L0BWX0_LUCCU	Uncharacterized protein OS=Lucilia cuprina GN=FF38_08333 PE=3 SV=1	IPR002129:Pyridoxal phosphate-dependent decarboxylase	GO:0016831	carboxy-lyase activity	path:ko00430	Taurine and hypotaurine metabolism
evm.model.Contig3.1156	30.5373	43.5299	28.2566	42.4049	53.3777	45.8992	81.1163	100.684	91.8042	143.775	77.7687	95.3613	130.206	129.956	128.052				tr|A0A1L8ECK5|A0A1L8ECK5_HAEIR	Uncharacterized protein OS=Haematobia irritans PE=4 SV=1
evm.model.Contig10.176	78.197	77.2549	74.5174	35.5907	42.6665	43.5442	50.6016	66.8717	70.7043	67.2784	49.6791	58.1635	149.352	144.041	127.976	Erp44	ERP44_MOUSE	Endoplasmic reticulum resident protein 44 OS=Mus musculus GN=Erp44 PE=1 SV=1	tr|A0A1I8MII1|A0A1I8MII1_MUSDO	Uncharacterized protein OS=Musca domestica GN=101896174 PE=4 SV=1	IPR013766:Thioredoxin domain	GO:0045454	cell redox homeostasis
evm.model.Contig48.128	0.318727	0.189044	0.461103	2.816	0.851367	2.99463	2.32614	2.08375	1.40275	0.310305	1.13535	0.265077	41.0318	75.5549	127.838	mycC	MYCC_BACIU	Mycosubtilin synthase subunit C OS=Bacillus subtilis GN=mycC PE=3 SV=1	tr|A0A0L0CGN6|A0A0L0CGN6_LUCCU	Uncharacterized protein OS=Lucilia cuprina GN=FF38_12829 PE=4 SV=1	IPR009081:Phosphopantetheine binding ACP domain	GO:0003824	catalytic activity
evm.model.Contig43.10	79.3376	83.2172	79.3007	42.4017	47.5209	59.1895	57.4537	90.5895	102.223	54.422	45.4234	53.9741	152.139	134.404	127.389	TMED2	TMED2_CRIGR	Transmembrane emp24 domain-containing protein 2 (Fragment) OS=Cricetulus griseus GN=TMED2 PE=1 SV=1	tr|A0A0L0BY81|A0A0L0BY81_LUCCU	Uncharacterized protein OS=Lucilia cuprina GN=FF38_11825 PE=3 SV=1	IPR009038:GOLD domain	GO:0006810	transport
evm.model.Contig114.33	24.875	31.2414	27.099	10.4387	11.7024	8.46035	20.6544	14.9488	25.1589	134.268	87.3337	147.35	109.128	168.666	127.263	AGO2	AGO2_DROME	Protein argonaute-2 OS=Drosophila melanogaster GN=AGO2 PE=1 SV=3	tr|A0A0L0CDB4|A0A0L0CDB4_LUCCU	Protein argonaute-2 (Fragment) OS=Lucilia cuprina GN=FF38_07001 PE=3 SV=1	IPR032472:Argonaute linker 2 domain	GO:0003676	nucleic acid binding
evm.model.Contig162.20	104.693	136.292	147.914	64.6086	43.4463	49.4229	82.2322	44.584	59.3758	100.62	69.7054	87.9607	159.554	122.051	127.247	SPBC1773.06c	YGD6_SCHPO	Zinc-type alcohol dehydrogenase-like protein C1773.06c OS=Schizosaccharomyces pombe (strain 972 / ATCC 24843) GN=SPBC1773.06c PE=3 SV=1	tr|A0A1I8PJ53|A0A1I8PJ53_STOCA	Uncharacterized protein OS=Stomoxys calcitrans GN=106091764 PE=4 SV=1	IPR020843:Polyketide synthase, enoylreductase domain	GO:0016491	oxidoreductase activity
evm.model.Contig94.14	39.1945	38.2325	43.9657	12.9715	16.7793	10.5604	22.8783	57.1832	56.1523	78.3944	49.0102	73.5603	143.032	129.926	126.981				tr|A0A0L0C7A4|A0A0L0C7A4_LUCCU	Uncharacterized protein OS=Lucilia cuprina GN=FF38_04375 PE=4 SV=1
evm.model.Contig12.293	19.2862	20.4206	23.4907	17.2677	15.8499	16.3154	21.2679	26.9142	24.685	72.6122	40.6875	73.3353	123.943	120.804	126.758	zip	MYSN_DROME	Myosin heavy chain, non-muscle OS=Drosophila melanogaster GN=zip PE=1 SV=2	tr|A0A1I8MRB0|A0A1I8MRB0_MUSDO	Uncharacterized protein OS=Musca domestica GN=101892851 PE=3 SV=1	IPR004009:Myosin, N-terminal, SH3-like	GO:0005515	protein binding	path:ko04530	Tight junction
evm.model.Contig23.212	379.958	402.115	355.318	678.225	654.091	586.771	411.524	434.501	557.228	287.826	553.877	140.067	178.229	164.056	126.652	Pgam2	PGAM2_MOUSE	Phosphoglycerate mutase 2 OS=Mus musculus GN=Pgam2 PE=1 SV=3	tr|A0A0L0CER2|A0A0L0CER2_LUCCU	Phosphoglycerate mutase (Fragment) OS=Lucilia cuprina GN=FF38_11729 PE=3 SV=1	IPR005952:Phosphoglycerate mutase 1	GO:0004619	phosphoglycerate mutase activity	path:ko00010,path:ko00260,path:ko00680,path:ko04922,path:ko05230	Glycolysis / Gluconeogenesis|Glycine, serine and threonine metabolism|Methane metabolism|Glucagon signaling pathway|Central carbon metabolism in cancer
evm.model.Contig131.56	332.108	337.648	369.87	129.126	150.993	151.056	105.546	126.098	118.509	107.474	78.3558	99.0951	129.423	117.652	126.644				tr|A0A0L0C8B6|A0A0L0C8B6_LUCCU	Eukaryotic translation initiation factor 3 subunit G OS=Lucilia cuprina GN=FF38_09236 PE=3 SV=1	IPR000504:RNA recognition motif domain	GO:0003743	translation initiation factor activity	path:ko03013	RNA transport
evm.model.Contig33.45	542.288	453.744	604.83	105.866	149.738	141.634	870.892	1167.93	1177.75	330.303	173.947	255.926	136.133	129.263	126.602	VHA55	VATB_MANSE	V-type proton ATPase subunit B OS=Manduca sexta GN=VHA55 PE=2 SV=1	tr|A0A0L0C0P8|A0A0L0C0P8_LUCCU	Uncharacterized protein OS=Lucilia cuprina GN=FF38_11891 PE=3 SV=1	IPR000194:ATPase, F1/V1/A1 complex, alpha/beta subunit, nucleotide-binding domain	GO:0015992	proton transport	path:ko00190,path:ko04145,path:ko04150,path:ko04721,path:ko04966,path:ko05110,path:ko05120,path:ko05323	Oxidative phosphorylation|Phagosome|mTOR signaling pathway|Synaptic vesicle cycle|Collecting duct acid secretion|Vibrio cholerae infection|Epithelial cell signaling in Helicobacter pylori infection|Rheumatoid arthritis
evm.model.Contig52.135	187.501	162.622	139.323	84.6691	101.657	108.534	104.573	115.674	143.425	144.245	72.7005	127.485	150.489	151.521	126.546	Catsup	CSUP_DROME	Protein catecholamines up OS=Drosophila melanogaster GN=Catsup PE=2 SV=1	tr|A0A0L0C5B7|A0A0L0C5B7_LUCCU	Protein catecholamines up OS=Lucilia cuprina GN=FF38_08986 PE=4 SV=1	IPR003689:Zinc/iron permease	GO:0016020	membrane
evm.model.Contig58.71	632.363	776.843	708.151	1305.37	1277.16	918.212	1601.96	1362.81	1414.07	1358.51	2265.84	1012.79	162.823	171.771	126.153	Prm	MYSP1_DROME	Paramyosin, long form OS=Drosophila melanogaster GN=Prm PE=1 SV=1	tr|W8B7X0|W8B7X0_CERCA	Paramyosin, long form OS=Ceratitis capitata GN=MYSP1 PE=2 SV=1	IPR002928:Myosin tail	GO:0003774	motor activity
evm.model.Contig91.9	12.206	14.0314	13.8613	11.89	12.3495	9.07698	20.3794	25.5607	23.4069	80.404	52.2447	64.9715	93.4642	96.9532	125.517				tr|A0A0L0CGH2|A0A0L0CGH2_LUCCU	205 kDa microtubule-associated protein OS=Lucilia cuprina GN=FF38_12760 PE=4 SV=1
evm.model.Contig100.52	41.0022	38.3571	42.7017	44.3065	48.3884	49.5552	79.331	88.3512	86.7635	130.915	104.954	130.478	124.519	132.003	125.311	BLMH	BLMH_HUMAN	Bleomycin hydrolase OS=Homo sapiens GN=BLMH PE=1 SV=1	tr|A0A0L0C2J9|A0A0L0C2J9_LUCCU	Uncharacterized protein OS=Lucilia cuprina GN=FF38_08584 PE=4 SV=1	IPR004134:Peptidase C1B, bleomycin hydrolase	GO:0004197	cysteine-type endopeptidase activity
evm.model.Contig124.57	143.038	143.569	126.327	1022.26	869.11	475.125	1045.24	589.294	618.66	2770.43	6201.22	2444.67	229.208	272.781	124.433	TpnC73F	TNNC3_DROME	Troponin C, isoform 3 OS=Drosophila melanogaster GN=TpnC73F PE=2 SV=2	tr|A0A0L0BTD6|A0A0L0BTD6_LUCCU	Troponin C, isoform 3 OS=Lucilia cuprina GN=FF38_10730 PE=4 SV=1	IPR002048:EF-hand domain	GO:0005509	calcium ion binding
evm.model.Contig12.12	100.463	91.0937	88.8509	349.224	343.956	328.624	326.566	289.891	293.036	409.908	206.952	320.902	143.689	114.295	124.37	LCP17	CU17_BOMMO	Larval cuticle protein LCP-17 OS=Bombyx mori GN=LCP17 PE=2 SV=1	tr|A0A0L0CKS9|A0A0L0CKS9_LUCCU	Uncharacterized protein OS=Lucilia cuprina GN=FF38_01699 PE=4 SV=1	IPR000618:Insect cuticle protein	GO:0042302	structural constituent of cuticle
evm.model.Contig48.29	17.1303	14.7397	15.0838	3.00057	5.38625	4.70669	8.91403	4.7786	11.9911	282.411	119.127	262.706	203.232	186.892	124.284				tr|A0A0L0CGG8|A0A0L0CGG8_LUCCU	Uncharacterized protein OS=Lucilia cuprina GN=FF38_12788 PE=4 SV=1
evm.model.Contig18.343	33.1378	44.33	36.0946	60.5361	58.6835	46.994	55.1046	46.6515	52.3845	38.0221	44.1911	24.2008	145.347	141.899	124.217	nhl-1	NHL1_CAEEL	RING finger protein nhl-1 OS=Caenorhabditis elegans GN=nhl-1 PE=1 SV=2	tr|A0A0L0BTT9|A0A0L0BTT9_LUCCU	Uncharacterized protein OS=Lucilia cuprina GN=FF38_13369 PE=4 SV=1	IPR001258:NHL repeat	GO:0005515	protein binding	path:ko05206	MicroRNAs in cancer
evm.model.Contig113.68	106.277	95.5191	93.5452	53.1725	61.6222	60.6817	76.7219	101.528	117.267	83.3485	57.8975	70.5765	146.312	143.16	124.099	Rpn1	RPN1_MOUSE	Dolichyl-diphosphooligosaccharide--protein glycosyltransferase subunit 1 OS=Mus musculus GN=Rpn1 PE=1 SV=1	tr|A0A0L0C376|A0A0L0C376_LUCCU	Dolichyl-diphosphooligosaccharide--protein glycosyltransferase subunit 1 OS=Lucilia cuprina GN=FF38_06339 PE=3 SV=1	IPR007676:Ribophorin I	GO:0004579	dolichyl-diphosphooligosaccharide-protein glycotransferase activity	path:ko00510,path:ko00513,path:ko04141	N-Glycan biosynthesis|Various types of N-glycan biosynthesis|Protein processing in endoplasmic reticulum
evm.model.Contig6.30	0.182466	0.147011	0.168473	0.351768	0.174831	0	0.683321	0	0.16384	69.4391	35.3366	177.81	150.904	305.052	123.988				tr|A0A1I8N691|A0A1I8N691_MUSDO	Uncharacterized protein OS=Musca domestica GN=101895511 PE=4 SV=1	IPR024518:Domain of unknown function DUF3421
evm.model.Contig25.34	38.3202	23.2002	41.5359	32.1554	24.8844	24.011	47.4463	68.2336	62.9743	149.48	63.9381	106.199	120.189	108.289	123.854	ABCG1	ABCG1_HUMAN	ATP-binding cassette sub-family G member 1 OS=Homo sapiens GN=ABCG1 PE=1 SV=3	tr|A0A0L0BM15|A0A0L0BM15_LUCCU	Uncharacterized protein OS=Lucilia cuprina GN=FF38_09025 PE=4 SV=1	IPR013525:ABC-2 type transporter	GO:0005524	ATP binding
evm.model.Contig65.88	12.9562	14.7539	13.082	8.77268	9.21242	6.63345	56.0648	45.8848	50.9588	166.568	88.8916	167.68	97.0523	85.6378	123.676	VWDE	VWDE_HUMAN	von Willebrand factor D and EGF domain-containing protein OS=Homo sapiens GN=VWDE PE=2 SV=4	tr|A0A0L0BMD8|A0A0L0BMD8_LUCCU	Uncharacterized protein OS=Lucilia cuprina GN=FF38_00045 PE=4 SV=1	IPR003341:Cysteine rich repeat, tripleX
evm.model.Contig162.24	318.746	308.593	356.035	116.266	118.674	122.869	130.752	133.916	131.326	107.092	87.423	96.9066	121.525	118.539	123.408	GE14456	CDV3_DROYA	Protein CDV3 homolog OS=Drosophila yakuba GN=GE14456 PE=2 SV=1	tr|A0A0L0CB62|A0A0L0CB62_LUCCU	Uncharacterized protein (Fragment) OS=Lucilia cuprina GN=FF38_11569 PE=4 SV=1	IPR026806:Protein CDV3
evm.model.Contig92.79	48.5325	45.0552	55.048	13.0478	14.4625	13.7872	25.2833	41.534	41.2468	42.3609	23.7638	42.5791	147.035	124.574	123.399	Nucb2	NUCB2_RAT	Nucleobindin-2 OS=Rattus norvegicus GN=Nucb2 PE=1 SV=1	tr|A0A0L0C119|A0A0L0C119_LUCCU	Uncharacterized protein OS=Lucilia cuprina GN=FF38_04642 PE=4 SV=1	IPR002048:EF-hand domain	GO:0005509	calcium ion binding
evm.model.Contig87.110	386.557	404.517	411.549	171.441	192.903	192.539	141.874	148.73	146.59	106.993	84.7261	89.8354	137.946	122.01	123.388	Tango7	EIF3M_DROER	Eukaryotic translation initiation factor 3 subunit M OS=Drosophila erecta GN=Tango7 PE=3 SV=1	tr|A0A0L0BUA5|A0A0L0BUA5_LUCCU	Eukaryotic translation initiation factor 3 subunit M OS=Lucilia cuprina GN=FF38_13724 PE=3 SV=1	IPR000717:Proteasome component (PCI) domain	GO:0005515	protein binding
evm.model.Contig72.20	2.45424	1.86267	4.78014	0.365811	1.31875	2.73983	7.87784	14.1173	3.14662	134.339	60.3649	156.719	81.1566	651.611	123.359	FIBCD1	FBCD1_HUMAN	Fibrinogen C domain-containing protein 1 OS=Homo sapiens GN=FIBCD1 PE=1 SV=2	tr|A0A0L0BMP0|A0A0L0BMP0_LUCCU	Uncharacterized protein OS=Lucilia cuprina GN=FF38_08408 PE=4 SV=1	IPR002181:Fibrinogen, alpha/beta/gamma chain, C-terminal globular domain
evm.model.Contig58.148	324.942	326.29	370.624	128.364	144.645	134.916	124.216	148.35	139.624	106.634	86.4964	90.5783	135.355	119.591	122.918	eIF3-S9	EIF3B_DROME	Eukaryotic translation initiation factor 3 subunit B OS=Drosophila melanogaster GN=eIF3-S9 PE=1 SV=1	tr|A0A0L0BMD0|A0A0L0BMD0_LUCCU	Eukaryotic translation initiation factor 3 subunit B OS=Lucilia cuprina GN=FF38_08395 PE=3 SV=1	IPR011400:Eukaryotic translation initiation factor 3 subunit B	GO:0003676	nucleic acid binding	path:ko03013	RNA transport
evm.model.Contig28.175	172.279	178.565	205.656	46.5632	51.1228	45.5306	60.9744	56.5353	50.2464	117.267	62.9841	101.65	115.491	125.972	122.888	CG7414	EIF2A_DROME	Eukaryotic translation initiation factor 2A OS=Drosophila melanogaster GN=CG7414 PE=1 SV=1	tr|A0A0L0CHH0|A0A0L0CHH0_LUCCU	Eukaryotic translation initiation factor 2A OS=Lucilia cuprina GN=FF38_09304 PE=4 SV=1	IPR013979:Translation initiation factor, beta propellor-like domain
evm.model.Contig130.31	619.925	492.166	454.117	571.941	632.16	545.372	663.609	682.904	644.374	196.79	316.657	135.615	149.339	153.593	122.667	COX7A	COX7A_DROME	Cytochrome c oxidase subunit 7A, mitochondrial OS=Drosophila melanogaster GN=COX7A PE=1 SV=1	tr|A0A0L0CM92|A0A0L0CM92_LUCCU	Putative cytochrome c oxidase subunit 7A, mitochondrial OS=Lucilia cuprina GN=FF38_04310 PE=4 SV=1	IPR003177:Cytochrome c oxidase, subunit VIIa	GO:0004129	cytochrome-c oxidase activity	path:ko00190,path:ko04260,path:ko04714,path:ko04932,path:ko05010,path:ko05012,path:ko05016	Oxidative phosphorylation|Cardiac muscle contraction|Thermogenesis|Non-alcoholic fatty liver disease (NAFLD)|Alzheimer's disease|Parkinson's disease|Huntington's disease
evm.model.Contig7.505	126.363	114.708	138.89	155.116	208.558	187.83	148.143	136.443	134.349	109.769	92.1863	86.108	162.276	145.747	122.618	Nedd8	NEDD8_DROME	NEDD8 OS=Drosophila melanogaster GN=Nedd8 PE=1 SV=1	tr|A0A1I8NB02|A0A1I8NB02_MUSDO	Uncharacterized protein OS=Musca domestica GN=101898489 PE=4 SV=1	IPR000626:Ubiquitin domain	GO:0005515	protein binding
evm.model.Contig6.653	66.3905	60.7967	69.5653	39.3725	49.5701	37.8821	66.8713	71.2053	67.0069	178.067	88.4126	146.219	151.567	136.223	122.176	Syb	SYB_DROME	Synaptobrevin OS=Drosophila melanogaster GN=Syb PE=2 SV=3	tr|A0A1I8N5V5|A0A1I8N5V5_MUSDO	Uncharacterized protein OS=Musca domestica GN=101900709 PE=4 SV=1	IPR001388:Synaptobrevin	GO:0016021	integral component of membrane	path:ko04130,path:ko04721,path:ko04911,path:ko04962,path:ko04970	SNARE interactions in vesicular transport|Synaptic vesicle cycle|Insulin secretion|Vasopressin-regulated water reabsorption|Salivary secretion
evm.model.Contig14.125	0.118626	0	0.324558	0.505654	0.209765	0.266353	41.2576	223.834	165.454	423.644	398.127	470.407	123.419	127.249	121.158	Gclc	GSH1_DROME	Glutamate--cysteine ligase OS=Drosophila melanogaster GN=Gclc PE=2 SV=1	tr|A0A0L0C589|A0A0L0C589_LUCCU	Uncharacterized protein OS=Lucilia cuprina GN=FF38_06546 PE=4 SV=1	IPR004308:Glutamate-cysteine ligase catalytic subunit	GO:0004357	glutamate-cysteine ligase activity	path:ko00270,path:ko00480,path:ko04212,path:ko04216	Cysteine and methionine metabolism|Glutathione metabolism|Longevity regulating pathway - worm|Ferroptosis
evm.model.Contig5.484	41.2233	38.6417	35.4465	50.7997	53.5686	61.3107	39.5875	46.983	46.0986	107.807	59.4945	99.2121	130.716	148.849	121.006	Prosalpha2	PSA2_DROME	Proteasome subunit alpha type-2 OS=Drosophila melanogaster GN=Prosalpha2 PE=1 SV=1	tr|A0A0L0CHE0|A0A0L0CHE0_LUCCU	Proteasome subunit alpha type OS=Lucilia cuprina GN=FF38_12419 PE=3 SV=1	IPR000426:Proteasome alpha-subunit, N-terminal domain	GO:0004175	endopeptidase activity	path:ko03050	Proteasome
evm.model.Contig12.279	20.5012	22.9954	19.8065	7.84388	5.92563	5.32713	30.3216	16.7301	50.2268	83.7248	48.6645	95.3606	90.9855	126.261	120.378	4CLL7	4CLL7_ARATH	4-coumarate--CoA ligase-like 7 OS=Arabidopsis thaliana GN=4CLL7 PE=1 SV=1	tr|A0A0L0BLP2|A0A0L0BLP2_LUCCU	Uncharacterized protein OS=Lucilia cuprina GN=FF38_02010 PE=4 SV=1	IPR000873:AMP-dependent synthetase/ligase	GO:0003824	catalytic activity
evm.model.Contig94.15	40.4467	40.6043	34.016	26.8454	36.1934	21.995	25.5915	51.5752	57.0602	77.6092	47.3144	72.5427	135.576	124.675	119.915	Lamb1	LAMB1_MOUSE	Laminin subunit beta-1 OS=Mus musculus GN=Lamb1 PE=1 SV=3	tr|A0A0L0C7A4|A0A0L0C7A4_LUCCU	Uncharacterized protein OS=Lucilia cuprina GN=FF38_04375 PE=4 SV=1
evm.model.Contig71.107	335.44	278.324	342.703	83.7065	103.225	107.422	398.314	485.742	483.67	176.182	81.2594	141.165	120.18	117.877	119.372	ATP6AP2	RENR_BOVIN	Renin receptor OS=Bos taurus GN=ATP6AP2 PE=1 SV=2	tr|A0A0L0CKF8|A0A0L0CKF8_LUCCU	Uncharacterized protein OS=Lucilia cuprina GN=FF38_03812 PE=4 SV=1	IPR012493:Renin receptor-like	GO:0004872	receptor activity
evm.model.Contig152.28	293.474	273.969	325.254	143.533	169.68	161.413	39.7826	66.684	55.815	93.258	83.8975	73.2379	128.808	108.713	119.225	B52	SRR55_DROME	Serine-arginine protein 55 OS=Drosophila melanogaster GN=B52 PE=1 SV=4	tr|A0A0L0C0C8|A0A0L0C0C8_LUCCU	Serine-arginine protein 55 OS=Lucilia cuprina GN=FF38_07878 PE=4 SV=1	IPR000504:RNA recognition motif domain	GO:0003676	nucleic acid binding	path:ko03040,path:ko05168	Spliceosome|Herpes simplex infection
evm.model.Contig14.191	10.0898	11.3641	12.8213	6.55911	5.6393	5.88538	8.00998	8.59219	8.65347	20.3719	14.1832	16.2638	123.294	114.791	118.965	UBR1	UBR1_DROME	E3 ubiquitin-protein ligase UBR1 OS=Drosophila melanogaster GN=UBR1 PE=2 SV=2	tr|A0A0L0BPU9|A0A0L0BPU9_LUCCU	E3 ubiquitin-protein ligase UBR1 (Fragment) OS=Lucilia cuprina GN=FF38_13923 PE=4 SV=1	IPR003126:Zinc finger, UBR-type	GO:0008270	zinc ion binding
evm.model.Contig5.244	5.77509	7.61667	8.3161	11.7594	10.2739	7.21668	9.70542	17.198	10.9401	23.7712	40.8547	18.8455	100.739	100.561	118.866	Jupiter	JUPIT_DROGR	Microtubule-associated protein Jupiter OS=Drosophila grimshawi GN=Jupiter PE=3 SV=1	tr|T1PER3|T1PER3_MUSDO	Uncharacterized protein OS=Musca domestica GN=101891172 PE=2 SV=1	IPR033335:Microtubule-associated protein Jupiter
evm.model.Contig14.192	3.78878	1.86943	2.79008	2.38355	2.1758	1.62614	1.89291	1.10775	1.66182	58.8961	15.2954	62.5728	145.171	132.956	118.829	FAXDC2	FXDC2_MACFA	Fatty acid hydroxylase domain-containing protein 2 OS=Macaca fascicularis GN=FAXDC2 PE=2 SV=1	tr|A0A1I8PWL9|A0A1I8PWL9_STOCA	Uncharacterized protein OS=Stomoxys calcitrans GN=106082900 PE=3 SV=1	IPR006694:Fatty acid hydroxylase	GO:0005506	iron ion binding	path:ko00100	Steroid biosynthesis
evm.model.Contig91.12	7.604	10.9099	12.1606	10.2012	11.2826	7.48	20.9638	26.0363	25.1916	76.1509	55.3956	64.3995	92.9369	100.869	118.262	Map205	MA205_DROME	205 kDa microtubule-associated protein OS=Drosophila melanogaster GN=Map205 PE=1 SV=2	tr|A0A0L0CGH2|A0A0L0CGH2_LUCCU	205 kDa microtubule-associated protein OS=Lucilia cuprina GN=FF38_12760 PE=4 SV=1	IPR009818:Ataxin-2, C-terminal
evm.model.Contig121.44	18.1738	20.0134	19.3598	16.1526	12.8086	9.43103	49.763	32.6357	35.414	155.164	71.751	170.046	138.476	122.875	117.421	ref(2)P	REF2P_DROSI	Protein ref(2)P OS=Drosophila simulans GN=ref(2)P PE=3 SV=1	tr|A0A0L0CF93|A0A0L0CF93_LUCCU	Uncharacterized protein (Fragment) OS=Lucilia cuprina GN=FF38_03551 PE=4 SV=1	IPR000433:Zinc finger, ZZ-type	GO:0008270	zinc ion binding
evm.model.Contig48.121	3.49256	2.35283	1.69949	3.21227	4.05073	3.06716	2.24166	1.75719	3.37248	6.14417	5.11732	4.07541	184.349	138.192	117.229				tr|A0A0L0CH61|A0A0L0CH61_LUCCU	Uncharacterized protein OS=Lucilia cuprina GN=FF38_12824 PE=4 SV=1	IPR026748:Clarin
evm.model.Contig71.116	117.149	110.601	99.4382	190.851	176.133	153.726	176.378	196.023	218.637	150.082	221.03	108.202	120.045	129.762	117.208	RUFY2	RUFY2_HUMAN	RUN and FYVE domain-containing protein 2 OS=Homo sapiens GN=RUFY2 PE=1 SV=2	tr|A0A0L0C7I2|A0A0L0C7I2_LUCCU	Uncharacterized protein OS=Lucilia cuprina GN=FF38_14138 PE=3 SV=1	IPR000306:FYVE zinc finger	GO:0004807	triose-phosphate isomerase activity
evm.model.Contig34.72	0.118307	0.232476	0.398307	0.244083	0.480951	0.447347	27.7212	16.969	18.0096	6.75325	2.87828	4.43585	58.2862	98.2675	116.924	Cyp6a9	CP6A9_DROME	Cytochrome P450 6a9 OS=Drosophila melanogaster GN=Cyp6a9 PE=2 SV=3	tr|A0A068FC16|A0A068FC16_CALSG	Cytochrome P450 OS=Calliphora stygia GN=Cyp39 PE=2 SV=1	IPR001128:Cytochrome P450	GO:0005506	iron ion binding
evm.model.Contig152.27	164.773	183.926	215.28	58.3949	76.3893	70.013	28.0069	39.3756	35.7801	94.8553	75.8499	70.8672	121.178	126.092	116.578	Hrb87F	RB87F_DROME	Heterogeneous nuclear ribonucleoprotein 87F OS=Drosophila melanogaster GN=Hrb87F PE=2 SV=2	tr|A0A0L0BXV9|A0A0L0BXV9_LUCCU	Heterogeneous nuclear ribonucleoprotein 87F OS=Lucilia cuprina GN=FF38_07866 PE=4 SV=1	IPR000504:RNA recognition motif domain	GO:0003676	nucleic acid binding	path:ko03040	Spliceosome
evm.model.Contig61.150	14.4577	15.5897	17.6729	11.1637	11.5256	12.8769	11.6163	13.1376	11.8148	16.0693	14.4239	13.3518	99.9695	120.693	116.23	NADK	NADK_HUMAN	NAD kinase OS=Homo sapiens GN=NADK PE=1 SV=1	tr|A0A1I8Q6X2|A0A1I8Q6X2_STOCA	Uncharacterized protein OS=Stomoxys calcitrans GN=106082412 PE=3 SV=1	IPR002504:NAD kinase	GO:0003951	NAD+ kinase activity	path:ko00760	Nicotinate and nicotinamide metabolism
evm.model.Contig48.137	51.443	47.8501	53.3563	38.0616	41.4971	44.7347	65.7922	69.5384	70.0983	121.606	68.3046	100.9	126.635	111.417	116.213	RAB1A	RAB1A_LYMST	Ras-related protein Rab-1A OS=Lymnaea stagnalis GN=RAB1A PE=2 SV=1	tr|A0A0M3QYM8|A0A0M3QYM8_DROBS	Rab1 (Fragment) OS=Drosophila busckii GN=Dbus_chr3Rg2649 PE=4 SV=1	IPR001806:Small GTPase superfamily	GO:0003924	GTPase activity	path:ko05134	Legionellosis
evm.model.Contig37.59	4.21229	3.17519	3.87686	6.78451	8.04891	4.9238	14.86	11.0258	15.4305	81.8603	48.9146	74.9104	71.8152	51.234	116.091	GALM	GALM_BOVIN	Aldose 1-epivmerase OS=Bos taurus GN=GALM PE=2 SV=1	tr|A0A0L0CAY8|A0A0L0CAY8_LUCCU	Aldose 1-epimerase OS=Lucilia cuprina GN=FF38_04899 PE=3 SV=1	IPR008183:Aldose 1-/Glucose-6-phosphate 1-epimerase	GO:0005975	carbohydrate metabolic process	path:ko00010,path:ko00052	Glycolysis / Gluconeogenesis|Galactose metabolism
evm.model.Contig227.21	35.9632	35.6987	44.1915	37.5388	28.2557	28.609	37.7762	28.772	29.0413	109.351	46.8198	89.4634	110.053	111.995	115.864	mknk1	MKNK1_XENTR	MAP kinase-interacting serine/threonine-protein kinase 1 OS=Xenopus tropicalis GN=mknk1 PE=2 SV=1	tr|A0A0L0CK21|A0A0L0CK21_LUCCU	Uncharacterized protein OS=Lucilia cuprina GN=FF38_13112 PE=4 SV=1	IPR000719:Protein kinase domain	GO:0004672	protein kinase activity	path:ko04010,path:ko04066,path:ko04910	MAPK signaling pathway|HIF-1 signaling pathway|Insulin signaling pathway
evm.model.Contig1.798	96.9054	78.1053	80.5759	75.9823	88.9865	82.6238	81.9403	85.6287	97.3057	91.665	67.1121	83.8268	111.346	125.758	115.64				tr|A0A0L0CMC8|A0A0L0CMC8_LUCCU	Uncharacterized protein OS=Lucilia cuprina GN=FF38_05812 PE=4 SV=1	IPR010357:Protein of unknown function DUF953, thioredoxin-like
evm.model.Contig185.5	2.94998	1.76471	1.09598	7.17375	6.96215	7.01538	10.6145	5.66002	10.6579	77.0595	66.2608	166.627	228.063	73.1001	115.399				tr|A0A0L0CJF9|A0A0L0CJF9_LUCCU	Uncharacterized protein OS=Lucilia cuprina GN=FF38_01244 PE=4 SV=1	IPR001304:C-type lectin-like
evm.model.Contig52.146	109.827	117.107	118.815	91.1714	103.509	90.639	88.2594	102.988	91.8936	115.471	110.831	98.9788	119.171	112.636	115.335	Pp2A-29B	2AAA_DROME	Serine/threonine-protein phosphatase PP2A 65 kDa regulatory subunit OS=Drosophila melanogaster GN=Pp2A-29B PE=2 SV=4	tr|A0A0L0CB17|A0A0L0CB17_LUCCU	Serine/threonine-protein phosphatase PP2A 65 kDa regulatory subunit OS=Lucilia cuprina GN=FF38_02579 PE=4 SV=1	IPR021133:HEAT, type 2			path:ko03015,path:ko04071,path:ko04111,path:ko04113,path:ko04114,path:ko04151,path:ko04152,path:ko04261,path:ko04350,path:ko04390,path:ko04391,path:ko04530,path:ko04728,path:ko04730,path:ko05142,path:ko05160,path:ko05165	mRNA surveillance pathway|Sphingolipid signaling pathway|Cell cycle - yeast|Meiosis - yeast|Oocyte meiosis|PI3K-Akt signaling pathway|AMPK signaling pathway|Adrenergic signaling in cardiomyocytes|TGF-beta signaling pathway|Hippo signaling pathway|Hippo signaling pathway - fly|Tight junction|Dopaminergic synapse|Long-term depression|Chagas disease (American trypanosomiasis)|Hepatitis C|Human papil…
evm.model.Contig116.14	33.8342	36.2413	43.1436	16.9544	17.1443	15.303	27.7578	43.108	43.0728	124.218	67.3323	113.931	115.994	107.033	115.071	Chc	CLH_DROME	Clathrin heavy chain OS=Drosophila melanogaster GN=Chc PE=1 SV=1	tr|A0A1I8MWM7|A0A1I8MWM7_MUSDO	Clathrin heavy chain OS=Musca domestica GN=101898560 PE=3 SV=1	IPR000547:Clathrin, heavy chain/VPS, 7-fold repeat	GO:0006886	intracellular protein transport	path:ko04142,path:ko04144,path:ko04721,path:ko04961,path:ko05016,path:ko05100	Lysosome|Endocytosis|Synaptic vesicle cycle|Endocrine and other factor-regulated calcium reabsorption|Huntington's disease|Bacterial invasion of epithelial cells
evm.model.Contig116.4	106.749	95.2387	96.2827	33.3235	38.3578	85.333	96.341	266.421	312.624	44.7786	46.3865	37.2432	100.485	98.8696	114.532	tram1l1	TR1L1_XENLA	Translocating chain-associated membrane protein 1-like 1 OS=Xenopus laevis GN=tram1l1 PE=2 SV=1	tr|A0A0L0BWV7|A0A0L0BWV7_LUCCU	Uncharacterized protein OS=Lucilia cuprina GN=FF38_05661 PE=4 SV=1	IPR006634:TRAM/LAG1/CLN8 homology domain	GO:0016021	integral component of membrane	path:ko04141	Protein processing in endoplasmic reticulum
evm.model.Contig52.56	57.3106	60.9644	55.9643	64.6097	67.1962	66.1909	73.4059	82.1556	84.7257	104.485	77.6121	108.008	124.224	154.176	114.507	Arpc1a	ARC1A_MOUSE	Actin-related protein 2/3 complex subunit 1A OS=Mus musculus GN=Arpc1a PE=1 SV=1	tr|A0A0L0CJN3|A0A0L0CJN3_LUCCU	Uncharacterized protein OS=Lucilia cuprina GN=FF38_04531 PE=4 SV=1	IPR017383:Actin-related protein 2/3 complex subunit 1	GO:0005885	Arp2/3 protein complex	path:ko04144,path:ko04666,path:ko04810,path:ko05100,path:ko05130,path:ko05131,path:ko05132	Endocytosis|Fc gamma R-mediated phagocytosis|Regulation of actin cytoskeleton|Bacterial invasion of epithelial cells|Pathogenic Escherichia coli infection|Shigellosis|Salmonella infection
evm.model.Contig16.168	0.806316	2.85615	0.498581	24.5176	14.7958	30.2612	13.8991	22.286	14.3863	48.261	13.4591	50.5045	134.38	71.0585	114.327				tr|A0A0L0CF45|A0A0L0CF45_LUCCU	Uncharacterized protein OS=Lucilia cuprina GN=FF38_09568 PE=4 SV=1
evm.model.Contig15.241	331.694	143.717	323.541	39.6432	26.6741	34.3299	448.918	466.83	398.282	247.131	31.2086	379.23	116.457	112.615	114.209				tr|A0A0L0CKR1|A0A0L0CKR1_LUCCU	Uncharacterized protein (Fragment) OS=Lucilia cuprina GN=FF38_04836 PE=4 SV=1
evm.model.Contig14.221	28.6852	34.8277	30.146	35.3213	36.1723	33.207	21.3649	10.358	18.6373	119.156	58.276	102.553	95.8037	88.5692	114.15	Npc2a	NPC2_DROME	Protein NPC2 homolog OS=Drosophila melanogaster GN=Npc2a PE=1 SV=1	tr|A0A0L0CL09|A0A0L0CL09_LUCCU	NPC2-like protein OS=Lucilia cuprina GN=FF38_00548 PE=4 SV=1	IPR033916:ML domain, Npc2 like	GO:0032367	intracellular cholesterol transport	path:ko04142,path:ko04979	Lysosome|Cholesterol metabolism
evm.model.Contig119.64	17.5261	14.96	13.5431	20.0374	20.6511	20.4126	10.8786	11.9795	13.3928	77.3516	22.124	55.3823	93.9237	41.4666	113.99	AQP	AQP_CICVR	Aquaporin AQPcic OS=Cicadella viridis GN=AQP PE=1 SV=1	tr|A0A0L0CGS1|A0A0L0CGS1_LUCCU	Uncharacterized protein OS=Lucilia cuprina GN=FF38_06882 PE=3 SV=1	IPR000425:Major intrinsic protein	GO:0005215	transporter activity
evm.model.Contig3.269	141.447	139.067	150.486	77.5531	87.1284	80.9039	51.368	66.1115	57.5349	97.0927	76.4493	81.3236	116.021	113.119	113.952	me31B	DDX6_DROME	Putative ATP-dependent RNA helicase me31b OS=Drosophila melanogaster GN=me31B PE=1 SV=3	tr|A0A0L0CF16|A0A0L0CF16_LUCCU	Putative ATP-dependent RNA helicase me31b OS=Lucilia cuprina GN=FF38_03156 PE=3 SV=1	IPR011545:DEAD/DEAH box helicase domain	GO:0003676	nucleic acid binding	path:ko03018	RNA degradation
evm.model.Contig121.23	66.6165	44.2354	52.6936	30.3064	33.8847	31.69	34.3417	58.608	83.3805	292.046	121.38	290.124	120.385	131.985	113.927				tr|A0A0L0BRU3|A0A0L0BRU3_LUCCU	Uncharacterized protein OS=Lucilia cuprina GN=FF38_04103 PE=4 SV=1	IPR006593:Cytochrome b561/ferric reductase transmembrane
evm.model.Contig19.71	3.68943	3.79583	3.9694	2.1692	1.34673	1.60289	3.73756	4.14683	3.80355	47.404	25.9425	42.9614	133.017	137.317	113.746	Snx27	SNX27_MOUSE	Sorting nexin-27 OS=Mus musculus GN=Snx27 PE=1 SV=2	tr|A0A0L0C433|A0A0L0C433_LUCCU	Uncharacterized protein OS=Lucilia cuprina GN=FF38_08930 PE=4 SV=1	IPR001478:PDZ domain	GO:0007165	signal transduction
evm.model.Contig6.244	130.752	115.217	118.044	46.013	55.4104	76.7303	80.6392	133.74	138.082	85.6102	46.1879	76.6521	197.163	116.758	113.671	FKBP14	FKB14_PONAB	Peptidyl-prolyl cis-trans isomerase FKBP14 OS=Pongo abelii GN=FKBP14 PE=2 SV=1	tr|A0A1L8EE53|A0A1L8EE53_HAEIR	Peptidylprolyl isomerase OS=Haematobia irritans PE=4 SV=1	IPR023566:Peptidyl-prolyl cis-trans isomerase, FKBP-type	GO:0005509	calcium ion binding
evm.model.Contig152.36	0.0640788	0	0.146	0.567139	0.59718	0.733271	2.80751	2.70593	0.207122	2.77804	3.08989	2.20243	61.9856	86.3856	113.041	Acp2	EST6_APIME	Venom carboxylesterase-6 OS=Apis mellifera PE=2 SV=1	tr|A0A0L0BXX7|A0A0L0BXX7_LUCCU	Uncharacterized protein OS=Lucilia cuprina GN=FF38_07854 PE=4 SV=1	IPR002018:Carboxylesterase, type B
evm.model.Contig69.44	93.0286	94.7931	94.6522	49.1863	53.2875	39.738	33.2199	40.795	31.0531	64.3178	73.5912	51.4696	104.77	115.161	112.963	Inx2	INX2_DROME	Innexin inx2 OS=Drosophila melanogaster GN=Inx2 PE=1 SV=1	tr|A0A0L0BUG1|A0A0L0BUG1_LUCCU	Innexin OS=Lucilia cuprina GN=inx PE=3 SV=1	IPR000990:Innexin	GO:0005921	gap junction
evm.model.Contig5.602	109.151	112.503	133.637	30.9945	36.7891	34.0029	13.6269	29.0912	14.363	5.53236	6.26839	3.21752	104.265	133.279	112.679	Prat	PUR1_DROME	Amidophosphoribosyltransferase OS=Drosophila melanogaster GN=Prat PE=1 SV=2	tr|A0A0L0CK80|A0A0L0CK80_LUCCU	Amidophosphoribosyltransferase OS=Lucilia cuprina GN=FF38_00259 PE=3 SV=1	IPR000836:Phosphoribosyltransferase domain	GO:0009116	nucleoside metabolic process	path:ko00230,path:ko00250	Purine metabolism|Alanine, aspartate and glutamate metabolism
evm.model.Contig6.291	0.142236	0.0677701	0.0923794	0.0224271	0.133309	0.247048	0.186939	0.0613807	0.157616	3.78025	1.1614	1.92587	204.415	151.878	112.425	Tret1	TRET1_DROMO	Facilitated trehalose transporter Tret1 OS=Drosophila mojavensis GN=Tret1 PE=3 SV=2	tr|A0A0L0C1C9|A0A0L0C1C9_LUCCU	Uncharacterized protein OS=Lucilia cuprina GN=FF38_12240 PE=3 SV=1	IPR003663:Sugar/inositol transporter	GO:0016020	membrane
evm.model.Contig37.121	31.5868	31.1337	30.352	29.0548	25.8297	23.9669	27.598	28.9726	26.629	90.537	57.011	77.0619	114.227	112.533	112.401	arm	ARM_MUSDO	Armadillo segment polarity protein OS=Musca domestica GN=arm PE=2 SV=1	tr|A0A0L0C373|A0A0L0C373_LUCCU	Armadillo segment polarity protein OS=Lucilia cuprina GN=FF38_08143 PE=4 SV=1	IPR013284:Beta-catenin	GO:0004871	signal transducer activity	path:ko04015,path:ko04310,path:ko04390,path:ko04510,path:ko04520,path:ko04550,path:ko04670,path:ko04916,path:ko04919,path:ko04934,path:ko05100,path:ko05130,path:ko05165,path:ko05166,path:ko05167,path:ko05200,path:ko05205,path:ko05210,path:ko05213,path:ko05215,path:ko05216,path:ko05217,path:ko05224,path:ko05225,path:ko05226,path:ko05412,path:ko05418	Rap1 signaling pathway|Wnt signaling pathway|Hippo signaling pathway|Focal adhesion|Adherens junction|Signaling pathways regulating pluripotency of stem cells|Leukocyte transendothelial migration|Melanogenesis|Thyroid hormone signaling pathway|Cushing's syndrome|Bacterial invasion of epithelial cells|Pathogenic Escherichia coli infection|Human papillomavirus infection|HTLV-I infection|Kaposi's sa…
evm.model.Contig5.445	1700.37	1815.12	1567.5	3846.24	3716.19	2771.12	3887.98	2748.68	3021.36	2353.67	4286.1	1685.46	182.664	190.108	112.26	Tm2	TPM2_DROME	Tropomyosin-2 OS=Drosophila melanogaster GN=Tm2 PE=2 SV=1	tr|A0A0L0CPK0|A0A0L0CPK0_LUCCU	Tropomyosin-2 OS=Lucilia cuprina GN=FF38_10124 PE=3 SV=1	IPR000533:Tropomyosin
evm.model.Contig37.3	252.229	241.608	236.018	248.656	286.229	280.722	197.607	292.964	276.851	118.017	153.628	122.677	110.234	118.999	111.523	CHCHD10	CHC10_HUMAN	Coiled-coil-helix-coiled-coil-helix domain-containing protein 10, mitochondrial OS=Homo sapiens GN=CHCHD10 PE=1 SV=1	tr|A0A0L0BPZ6|A0A0L0BPZ6_LUCCU	Uncharacterized protein OS=Lucilia cuprina GN=FF38_03375 PE=4 SV=1
evm.model.Contig40.93	25.3515	20.6874	19.4326	42.4272	42.6818	30.0249	30.0045	39.4568	26.6225	18.6888	21.072	18.3328	166.137	208.561	111.517				tr|A0A0L0BQE3|A0A0L0BQE3_LUCCU	Uncharacterized protein OS=Lucilia cuprina GN=FF38_01866 PE=3 SV=1	IPR000215:Serpin family	GO:0005615	extracellular space
evm.model.Contig6.26	58.7512	36.586	48.0876	4.48551	4.0657	2.26976	102.727	137.002	154.265	64.6874	9.58091	73.4549	145.046	209.325	111.242	GH22027	NATT4_THANI	Natterin-4 OS=Thalassophryne nattereri PE=2 SV=1	tr|A0A0L0BXB9|A0A0L0BXB9_LUCCU	Uncharacterized protein OS=Lucilia cuprina GN=FF38_09038 PE=4 SV=1	IPR024518:Domain of unknown function DUF3421
evm.model.Contig1.491	5.6502	10.2965	10.8972	3.18819	1.94962	2.20598	24.6458	41.9431	30.1176	11.2157	0.748966	2.32076	38.6983	33.2449	110.767	bhlhe22	CYB5_RHIST	Cytochrome b5 OS=Rhizopus stolonifer PE=2 SV=1	tr|A0A0L0BNB7|A0A0L0BNB7_LUCCU	Uncharacterized protein OS=Lucilia cuprina GN=FF38_09044 PE=3 SV=1	IPR001199:Cytochrome b5-like heme/steroid binding domain
evm.model.Contig121.43	20.087	23.2895	23.1028	17.9053	19.2132	10.7382	52.7473	26.3641	29.7689	113.663	67.0421	144.81	127.128	107.74	110.593	ref(2)P	REF2P_DROSI	Protein ref(2)P OS=Drosophila simulans GN=ref(2)P PE=3 SV=1	tr|A0A0L0BRV9|A0A0L0BRV9_LUCCU	Uncharacterized protein (Fragment) OS=Lucilia cuprina GN=FF38_04120 PE=4 SV=1	IPR033741:Sequestosome-1, UBA domain
evm.model.Contig121.57	151.35	182.064	141.781	764.438	540.878	735.041	454.725	347.33	567.957	176.613	1326.02	144.772	91.0495	31.3238	110.369				tr|A0A0L0BRX7|A0A0L0BRX7_LUCCU	Uncharacterized protein OS=Lucilia cuprina GN=FF38_04128 PE=4 SV=1
evm.model.Contig77.49	255.907	270.309	327.141	82.0984	105.305	84.2917	71.7475	133.484	95.9841	99.4654	67.8925	81.0139	115.967	103.502	110.119	sqd	SQD_DROME	RNA-binding protein squid OS=Drosophila melanogaster GN=sqd PE=1 SV=3	tr|T1PB72|T1PB72_MUSDO	RNA recognition protein OS=Musca domestica PE=2 SV=1	IPR000504:RNA recognition motif domain	GO:0003676	nucleic acid binding	path:ko04320	Dorso-ventral axis formation
evm.model.Contig69.63	0.0771881	0.539702	0.0176362	0	0.0626339	0.0640655	0.0386489	0	0	0.075663	0.0754569	0.0591814	50.5662	71.3673	109.722				tr|A0A0L0BU71|A0A0L0BU71_LUCCU	Uncharacterized protein OS=Lucilia cuprina GN=FF38_00968 PE=4 SV=1
evm.model.Contig7.376	62.0772	62.0054	59.1537	83.8895	96.8642	86.4548	127.616	141.956	170.595	165.772	119.507	144.303	127.796	133.396	109.588	RTN4	RTN4_HUMAN	Reticulon-4 OS=Homo sapiens GN=RTN4 PE=1 SV=2	tr|A0A0L0BS32|A0A0L0BS32_LUCCU	Reticulon-like protein OS=Lucilia cuprina GN=FF38_08039 PE=4 SV=1	IPR003388:Reticulon
evm.model.Contig23.230	193.916	159.673	183.499	92.5484	95.4998	91.1794	214.444	292.167	255.622	97.5753	77.9037	88.6207	88.1577	84.6136	109.481	ACO1	ACOC_BOVIN	Cytoplasmic aconitate hydratase OS=Bos taurus GN=ACO1 PE=2 SV=1	tr|A0A0L0CEH4|A0A0L0CEH4_LUCCU	Aconitate hydratase OS=Lucilia cuprina GN=FF38_11749 PE=3 SV=1	IPR001030:Aconitase/3-isopropylmalate dehydratase large subunit, alpha/beta/alpha domain	GO:0008152	metabolic process	path:ko00020,path:ko00630,path:ko00720	Citrate cycle (TCA cycle)|Glyoxylate and dicarboxylate metabolism|Carbon fixation pathways in prokaryotes
evm.model.Contig2.662	578.99	526.797	551.647	559.03	558.967	494.19	644.471	685.246	634.136	201.851	328.892	167.933	115.38	110.267	109.397	PMPCB	MPPB_BOVIN	Mitochondrial-processing peptidase subunit beta OS=Bos taurus GN=PMPCB PE=2 SV=1	tr|A0A0L0CB92|A0A0L0CB92_LUCCU	Uncharacterized protein OS=Lucilia cuprina GN=FF38_05067 PE=3 SV=1	IPR007863:Peptidase M16, C-terminal
evm.model.Contig153.38	36.2137	33.2388	34.7548	30.5376	37.6983	36.8639	30.9537	41.3668	38.8777	73.2738	48.3678	68.9564	121.162	145.518	109.393	USP14	UBP14_RABIT	Ubiquitin carboxyl-terminal hydrolase 14 OS=Oryctolagus cuniculus GN=USP14 PE=1 SV=3	tr|A0A0L0BQE2|A0A0L0BQE2_LUCCU	Uncharacterized protein OS=Lucilia cuprina GN=FF38_07294 PE=3 SV=1	IPR028889:Ubiquitin specific protease domain	GO:0016579	protein deubiquitination
evm.model.Contig1.660	311.259	303.005	317.002	306.305	291.268	245.691	467.104	489.276	472.215	330.341	474.736	267.313	119.652	127.203	109.365	aco-2	ACON_CAEEL	Probable aconitate hydratase, mitochondrial OS=Caenorhabditis elegans GN=aco-2 PE=3 SV=2	tr|A0A0L0CD74|A0A0L0CD74_LUCCU	Aconitate hydratase, mitochondrial OS=Lucilia cuprina GN=FF38_06584 PE=3 SV=1	IPR001030:Aconitase/3-isopropylmalate dehydratase large subunit, alpha/beta/alpha domain	GO:0008152	metabolic process	path:ko00020,path:ko00630,path:ko00720	Citrate cycle (TCA cycle)|Glyoxylate and dicarboxylate metabolism|Carbon fixation pathways in prokaryotes
evm.model.Contig8.483	16.4309	12.2701	12.3092	44.0264	30.5088	27.4564	41.394	20.2618	27.981	261.455	175.064	227.133	95.5506	107.313	109.259	PAIP2B	PAI2B_HUMAN	Polyadenylate-binding protein-interacting protein 2B OS=Homo sapiens GN=PAIP2B PE=1 SV=2	tr|A0A0L0C982|A0A0L0C982_LUCCU	Uncharacterized protein OS=Lucilia cuprina GN=FF38_06174 PE=4 SV=1
evm.model.Contig30.177	55.2389	47.563	50.0197	29.2256	31.8005	30.3554	30.7543	42.8698	41.541	59.394	60.9886	46.5785	136.895	143.908	109.171	NPEPPS	PSA_HUMAN	Puromycin-sensitive aminopeptidase OS=Homo sapiens GN=NPEPPS PE=1 SV=2	tr|A0A0L0CND7|A0A0L0CND7_LUCCU	Uncharacterized protein OS=Lucilia cuprina GN=FF38_07776 PE=4 SV=1	IPR001930:Peptidase M1, alanine aminopeptidase/leukotriene A4 hydrolase	GO:0006508	proteolysis
evm.model.Contig18.117	0	0	0	0	0	0	0	0	0	0	0	0	93.2522	56.2103	109.096	COL28A1	COSA1_HUMAN	Collagen alpha-1(XXVIII) chain OS=Homo sapiens GN=COL28A1 PE=2 SV=2	tr|A0A0L0BUX5|A0A0L0BUX5_LUCCU	Uncharacterized protein OS=Lucilia cuprina GN=FF38_12853 PE=4 SV=1	IPR002223:Pancreatic trypsin inhibitor Kunitz domain	GO:0004867	serine-type endopeptidase inhibitor activity
evm.model.Contig34.20	64.7665	65.0936	51.6519	61.2244	78.8125	54.9594	60.4901	71.9246	58.9124	118.84	72.1642	98.5485	116.39	131.298	108.883	DYNLRB2	DLRB2_BOVIN	Dynein light chain roadblock-type 2 OS=Bos taurus GN=DYNLRB2 PE=3 SV=1	tr|T1D5K7|T1D5K7_9DIPT	Dynein light chain roadblock OS=Psorophora albipes PE=2 SV=1	IPR004942:Roadblock/LAMTOR2 domain
evm.model.Contig13.50	21.5894	23.6147	26.6182	15.355	14.895	11.8618	24.923	27.3876	27.0422	91.9631	47.7146	78.0667	101.863	105.999	108.695	CLCN3	CLCN3_RABIT	H(+)/Cl(-) exchange transporter 3 OS=Oryctolagus cuniculus GN=CLCN3 PE=2 SV=3	tr|A0A0L0BQ37|A0A0L0BQ37_LUCCU	Chloride channel protein OS=Lucilia cuprina GN=FF38_05870 PE=3 SV=1	IPR000644:CBS domain	GO:0005247	voltage-gated chloride channel activity
evm.model.Contig16.248	98.2556	79.8743	91.5163	74.3576	81.9613	74.8094	77.9296	78.9402	73.5824	119.21	77.1798	85.4942	131.633	124.347	108.663	UBE2V2	UB2V2_CHICK	Ubiquitin-conjugating enzyme E2 variant 2 OS=Gallus gallus GN=UBE2V2 PE=2 SV=1	tr|A0A0L0CD37|A0A0L0CD37_LUCCU	Uncharacterized protein OS=Lucilia cuprina GN=FF38_09518 PE=3 SV=1	IPR000608:Ubiquitin-conjugating enzyme E2			path:ko04624	Toll and Imd signaling pathway
evm.model.Contig5.150	94.0941	86.0367	90.1694	48.4746	48.7919	45.3028	57.4746	56.4981	58.2923	99.2389	69.1503	80.8851	126.414	117.741	108.545	Ubc6	UBCD6_DROME	Ubiquitin-conjugating enzyme E2-17 kDa OS=Drosophila melanogaster GN=Ubc6 PE=2 SV=2	tr|A0A1W4UJY5|A0A1W4UJY5_DROFC	ubiquitin-conjugating enzyme E2-17 kDa OS=Drosophila ficusphila GN=LOC108090221 PE=3 SV=1	IPR000608:Ubiquitin-conjugating enzyme E2			path:ko04120	Ubiquitin mediated proteolysis
evm.model.Contig34.5	61.5265	58.3471	52.9532	78.5409	86.9133	17.7032	10.0175	2.562	9.32433	83.7478	110.749	28.1357	101.372	93.3151	108.429				tr|A0A0L0CJB1|A0A0L0CJB1_LUCCU	Uncharacterized protein OS=Lucilia cuprina GN=FF38_12479 PE=4 SV=1	IPR001304:C-type lectin-like
evm.model.Contig23.235	39.5214	37.6705	38.0236	32.2528	30.0575	30.4278	24.7811	29.4984	28.2737	94.7947	53.2992	89.3091	108.431	121.961	107.528	AP2M1	AP2M1_CHICK	AP-2 complex subunit mu OS=Gallus gallus GN=AP2M1 PE=2 SV=1	tr|T1PDM2|T1PDM2_MUSDO	Uncharacterized protein OS=Musca domestica GN=101897295 PE=2 SV=1	IPR028565:Mu homology domain	GO:0006886	intracellular protein transport	path:ko04144,path:ko04721,path:ko04961,path:ko05016	Endocytosis|Synaptic vesicle cycle|Endocrine and other factor-regulated calcium reabsorption|Huntington's disease
evm.model.Contig14.120	73.0375	69.1877	68.3859	33.312	33.281	39.5374	42.2495	64.437	78.4224	49.1796	35.4846	38.7579	124.508	105.924	107.082	TMED3	TMED3_HUMAN	Transmembrane emp24 domain-containing protein 3 OS=Homo sapiens GN=TMED3 PE=1 SV=1	tr|A0A0L0C593|A0A0L0C593_LUCCU	Uncharacterized protein OS=Lucilia cuprina GN=FF38_06547 PE=3 SV=1	IPR009038:GOLD domain	GO:0006810	transport
evm.model.Contig16.389	469.963	461.856	348.926	320.41	327.35	265.303	136.503	155.801	261.772	54.6091	308.832	26.0236	128.883	96.1664	106.776	ImpL3	LDH_DROME	L-lactate dehydrogenase OS=Drosophila melanogaster GN=ImpL3 PE=2 SV=1	tr|A0A0L0CPC7|A0A0L0CPC7_LUCCU	L-lactate dehydrogenase OS=Lucilia cuprina GN=FF38_00001 PE=3 SV=1	IPR001557:L-lactate/malate dehydrogenase	GO:0016616	oxidoreductase activity, acting on the CH-OH group of donors, NAD or NADP as acceptor	path:ko00010,path:ko00270,path:ko00620,path:ko00640,path:ko04922	Glycolysis / Gluconeogenesis|Cysteine and methionine metabolism|Pyruvate metabolism|Propanoate metabolism|Glucagon signaling pathway
evm.model.Contig29.52	85.8941	76.8493	75.188	55.1467	58.994	69.4059	59.8639	78.2666	104.9	63.5627	57.2682	58.6894	134.509	135.768	106.628	CG9669	TM258_DROME	Transmembrane protein 258 homolog OS=Drosophila melanogaster GN=CG9669 PE=1 SV=1	tr|A0A0L0BLR1|A0A0L0BLR1_LUCCU	Putative transmembrane protein 258 OS=Lucilia cuprina GN=FF38_11199 PE=4 SV=1	IPR007915:Oligosaccharyltransferase complex subunit	GO:0006487	protein N-linked glycosylation
evm.model.Contig26.264	117.92	108.734	113.421	35.709	48.3829	48.8038	19.5632	29.6914	24.0885	61.8924	24.7676	35.8601	111.402	101.359	106.511	ADSL	PUR8_MACFA	Adenylosuccinate lyase OS=Macaca fascicularis GN=ADSL PE=2 SV=1	tr|A0A0L0CRA3|A0A0L0CRA3_LUCCU	Adenylosuccinate lyase OS=Lucilia cuprina GN=FF38_01970 PE=3 SV=1	IPR000362:Fumarate lyase family			path:ko00230,path:ko00250	Purine metabolism|Alanine, aspartate and glutamate metabolism
evm.model.Contig74.72	9.02621	9.06984	5.27748	6.39642	14.2814	11.0468	175.413	138.674	264.126	314.877	217.049	397.88	223.944	130.159	106.118				tr|A0A0L0C6Y3|A0A0L0C6Y3_LUCCU	Uncharacterized protein OS=Lucilia cuprina GN=FF38_04347 PE=4 SV=1	IPR029277:Single domain Von Willebrand factor type C domain
evm.model.Contig106.79	134.545	118.823	130.072	121.627	144.192	158.811	169.312	252	349.071	150.506	115.166	137.927	122.096	133.677	106.067	REEP5	REEP5_PONAB	Receptor expression-enhancing protein 5 OS=Pongo abelii GN=REEP5 PE=2 SV=1	tr|A0A0L0CM13|A0A0L0CM13_LUCCU	Receptor expression-enhancing protein OS=Lucilia cuprina GN=FF38_06054 PE=3 SV=1	IPR004345:TB2/DP1/HVA22-related protein
evm.model.Contig5.549	249.525	183.111	225.543	38.7129	57.9846	49.7017	118.207	195.67	254.349	122.75	335.649	273.395	69.6638	154.763	106.021	DPYS	DPYS_HUMAN	Dihydropyrimidinase OS=Homo sapiens GN=DPYS PE=1 SV=1	tr|A0A0L0CD47|A0A0L0CD47_LUCCU	Uncharacterized protein OS=Lucilia cuprina GN=FF38_12389 PE=4 SV=1	IPR006680:Amidohydrolase-related	GO:0016787	hydrolase activity	path:ko00240,path:ko00410,path:ko00770,path:ko00983	Pyrimidine metabolism|beta-Alanine metabolism|Pantothenate and CoA biosynthesis|Drug metabolism - other enzymes
evm.model.Contig29.42	199.419	178.765	194.386	91.4244	98.6912	97.0496	109.102	126.958	116.041	136.97	85.9091	121.652	95.6017	111.023	105.927	eIF-4E	IF4E_DROME	Eukaryotic translation initiation factor 4E OS=Drosophila melanogaster GN=eIF-4E PE=1 SV=1	tr|A0A0L0CPU7|A0A0L0CPU7_LUCCU	Eukaryotic translation initiation factor 4E OS=Lucilia cuprina GN=FF38_05996 PE=3 SV=1	IPR001040:Translation Initiation factor eIF- 4e	GO:0003723	RNA binding	path:ko01521,path:ko03013,path:ko04066,path:ko04150,path:ko04151,path:ko04211,path:ko04910	EGFR tyrosine kinase inhibitor resistance|RNA transport|HIF-1 signaling pathway|mTOR signaling pathway|PI3K-Akt signaling pathway|Longevity regulating pathway|Insulin signaling pathway
evm.model.Contig5.83	258.482	239.33	220.261	43.2352	59.4018	60.3336	49.6924	92.7023	115.237	28.1426	21.1944	22.8263	150.807	113.242	105.926	Manf	ARMET_DROSE	Mesencephalic astrocyte-derived neurotrophic factor homolog OS=Drosophila sechellia GN=Manf PE=3 SV=1	tr|A0A0L0C459|A0A0L0C459_LUCCU	Uncharacterized protein OS=Lucilia cuprina GN=FF38_10759 PE=4 SV=1	IPR002048:EF-hand domain	GO:0005509	calcium ion binding
evm.model.Contig108.42	15.2473	14.4868	12.9143	17.0299	20.066	2.4875	0	0.526799	0.500064	1.44887	1.45567	0.519671	34.4657	45.2765	105.881				tr|A0A0L0CFN5|A0A0L0CFN5_LUCCU	Uncharacterized protein OS=Lucilia cuprina GN=FF38_00567 PE=3 SV=1	IPR000215:Serpin family	GO:0005615	extracellular space
evm.model.Contig47.120	166.82	157.248	138.59	277.919	270.19	183.975	237.45	173.199	175.386	102.514	96.3696	58.8627	133.441	132.413	105.783	AK1	KAD1_CHICK	Adenylate kinase isoenzyme 1 OS=Gallus gallus GN=AK1 PE=1 SV=1	tr|A0A0L0BPT9|A0A0L0BPT9_LUCCU	Uncharacterized protein OS=Lucilia cuprina GN=FF38_13535 PE=3 SV=1	IPR000850:Adenylate kinase/UMP-CMP kinase	GO:0005524	ATP binding	path:ko00230,path:ko00730	Purine metabolism|Thiamine metabolism
evm.model.Contig5.347	32.6546	32.7224	34.4317	20.3874	24.4478	20.9737	13.1719	13.5112	13.4681	49.0181	31.7986	44.4992	75.3355	75.2464	105.492	Rel	NFKB1_DROME	Nuclear factor NF-kappa-B p110 subunit OS=Drosophila melanogaster GN=Rel PE=1 SV=1	tr|A0A0L0CE32|A0A0L0CE32_LUCCU	Nuclear factor NF-kappa-B p110 subunit OS=Lucilia cuprina GN=FF38_04187 PE=3 SV=1	IPR002909:IPT domain	GO:0004488	methylenetetrahydrofolate dehydrogenase (NADP+ activity)
evm.model.Contig6.376	0.733473	0.718551	0.167973	0.281412	1.21071	1.27936	0.696889	0.1723	0.540961	11.3193	18.1129	5.53296	18.8334	51.5771	105.463				tr|A0A0L0CKQ5|A0A0L0CKQ5_LUCCU	Uncharacterized protein OS=Lucilia cuprina GN=FF38_01698 PE=3 SV=1	IPR000215:Serpin family	GO:0005615	extracellular space	path:ko05146	Amoebiasis
evm.model.Contig98.25	1.62209	2.33783	0.591558	0.218	0.214421	0.330357	0	0.0973062	0	3.14736	0.304334	1.12353	33.6225	40.3595	104.979				tr|A0A0L0C6M9|A0A0L0C6M9_LUCCU	Uncharacterized protein OS=Lucilia cuprina GN=FF38_12683 PE=4 SV=1
evm.model.Contig6.477	11.6519	11.4885	12.8944	8.90961	8.63741	9.29858	11.9189	13.0339	12.7342	41.5623	29.8614	41.1095	126.612	115.532	104.773	Ube4b	UBE4B_MOUSE	Ubiquitin conjugation factor E4 B OS=Mus musculus GN=Ube4b PE=1 SV=3	tr|A0A0L0CN62|A0A0L0CN62_LUCCU	Uncharacterized protein OS=Lucilia cuprina GN=FF38_01785 PE=4 SV=1	IPR003613:U box domain	GO:0004842	ubiquitin-protein transferase activity	path:ko04120,path:ko04141	Ubiquitin mediated proteolysis|Protein processing in endoplasmic reticulum
evm.model.Contig17.230	0.778867	0.130849	0.142187	0.991385	0.163962	0.668622	0.774551	3.56003	0.745401	6.32199	5.22686	10.8759	76.913	82.1251	104.744	MME	NEP_RABIT	Neprilysin OS=Oryctolagus cuniculus GN=MME PE=1 SV=2	tr|A0A0L0C5J8|A0A0L0C5J8_LUCCU	Uncharacterized protein OS=Lucilia cuprina GN=FF38_11390 PE=4 SV=1	IPR000718:Peptidase M13	GO:0004222	metalloendopeptidase activity
evm.model.Contig21.89	22.4035	18.3353	16.0086	24.6374	18.2261	19.6749	29.3456	27.6749	21.4606	60.0337	27.1218	66.7256	126.816	117.465	104.743	Cotl1	COTL1_RAT	Coactosin-like protein OS=Rattus norvegicus GN=Cotl1 PE=1 SV=1	tr|A0A0L0BLH9|A0A0L0BLH9_LUCCU	Uncharacterized protein OS=Lucilia cuprina GN=FF38_11272 PE=4 SV=1	IPR002108:Actin-depolymerising factor homology domain	GO:0003779	actin binding
evm.model.Contig2.335	204.806	148.196	163.231	44.023	49.4347	40.2086	167.698	217.285	226.497	125.032	113.089	168.068	101.234	117.925	104.54	Selenbp1	SBP1_MOUSE	Selenium-binding protein 1 OS=Mus musculus GN=Selenbp1 PE=1 SV=2	tr|A0A0L0BVE7|A0A0L0BVE7_LUCCU	Uncharacterized protein OS=Lucilia cuprina GN=FF38_09071 PE=4 SV=1	IPR008826:Selenium-binding protein	GO:0008430	selenium binding
evm.model.Contig186.46	4.40753	3.93005	5.65304	6.01123	3.76078	3.99392	8.66332	11.8875	10.47	18.5222	11.2177	15.972	137.741	103.181	104.515	Mmp14	MMP14_RAT	Matrix metalloproteinase-14 OS=Rattus norvegicus GN=Mmp14 PE=2 SV=2	tr|A0A0L0C2N4|A0A0L0C2N4_LUCCU	Uncharacterized protein OS=Lucilia cuprina GN=FF38_10010 PE=3 SV=1	IPR018487:Hemopexin-like repeats	GO:0008237	metallopeptidase activity	path:ko04668,path:ko04912	TNF signaling pathway|GnRH signaling pathway
evm.model.Contig58.47	0.472127	1.55957	0.998205	0.659978	0.494906	0.167518	1.40098	2.47036	1.33859	15.2865	1.84309	12.8195	119.615	110.224	104.393				tr|A0A1I8NHC6|A0A1I8NHC6_MUSDO	Uncharacterized protein OS=Musca domestica GN=101894697 PE=4 SV=1
evm.model.Contig27.176	36.7913	29.0975	27.9927	23.0811	35.0659	30.4899	131.632	119.448	118.038	199.29	67.0331	212.205	104.285	92.3996	104.094	PXMP2	PXMP2_BOVIN	Peroxisomal membrane protein 2 OS=Bos taurus GN=PXMP2 PE=2 SV=3	tr|A0A1L8EBP6|A0A1L8EBP6_HAEIR	Putative conserved plasma membrane protein OS=Haematobia irritans PE=3 SV=1	IPR007248:Mpv17/PMP22	GO:0016021	integral component of membrane	path:ko04146	Peroxisome
evm.model.Contig7.274	80.9929	28.305	41.3262	7.62024	3.70275	1.25542	260.251	220.889	292.199	304.296	148.699	474.587	141.549	123.927	104.061	SPINK2	ISK2_MACFA	Serine protease inhibitor Kazal-type 2 OS=Macaca fascicularis GN=SPINK2 PE=2 SV=1	tr|A0A0L0CIH9|A0A0L0CIH9_LUCCU	Uncharacterized protein OS=Lucilia cuprina GN=FF38_14411 PE=4 SV=1	IPR002350:Kazal domain	GO:0005515	protein binding
evm.model.Contig27.256	387.829	381.349	296.501	891.669	809.573	597.275	1120.88	739.87	803.528	1231.96	1532.6	884.846	144.723	148.216	104				tr|A0A1L8EFZ5|A0A1L8EFZ5_HAEIR	Uncharacterized protein OS=Haematobia irritans PE=4 SV=1	IPR031847:Domain of unknown function DUF4749
evm.model.Contig132.11	67.1212	65.7427	76.5561	15.643	23.1639	21.281	9.75582	15.3351	9.87729	44.3401	12.1152	46.3849	119.376	105.205	103.777	ade2	PUR4_DROME	Phosphoribosylformylglycinamidine synthase OS=Drosophila melanogaster GN=ade2 PE=1 SV=2	tr|A0A0L0BT40|A0A0L0BT40_LUCCU	Phosphoribosylformylglycinamidine synthase (Fragment) OS=Lucilia cuprina GN=FF38_07742 PE=3 SV=1	IPR016188:PurM-like, N-terminal domain			path:ko00230	Purine metabolism
evm.model.Contig72.89	0.130572	0.220599	0.179781	0.751215	0.66745	0.617913	1.96924	5.28668	6.91313	106.612	39.031	117.479	98.7772	91.9796	103.652				tr|A0A1B0FCT7|A0A1B0FCT7_GLOMM	Uncharacterized protein OS=Glossina morsitans morsitans PE=3 SV=1	IPR002557:Chitin binding domain	GO:0005576	extracellular region
evm.model.Contig37.92	366.12	267.624	325.679	86.5244	107.625	103.244	353.075	426.489	390.456	171.561	86.4028	146.397	110.124	103.29	102.942	VhaAC39-1	VA0D1_DROME	V-type proton ATPase subunit d 1 OS=Drosophila melanogaster GN=VhaAC39-1 PE=2 SV=1	tr|A0A0L0C8U6|A0A0L0C8U6_LUCCU	V-type proton ATPase subunit OS=Lucilia cuprina GN=FF38_04922 PE=3 SV=1	IPR016727:ATPase, V0 complex, subunit d	GO:0015078	hydrogen ion transmembrane transporter activity	path:ko00190,path:ko04142,path:ko04145,path:ko04721,path:ko04966,path:ko05110,path:ko05120,path:ko05152,path:ko05203,path:ko05323	Oxidative phosphorylation|Lysosome|Phagosome|Synaptic vesicle cycle|Collecting duct acid secretion|Vibrio cholerae infection|Epithelial cell signaling in Helicobacter pylori infection|Tuberculosis|Viral carcinogenesis|Rheumatoid arthritis
evm.model.Contig5.193	19.547	15.2769	12.8537	14.2688	15.7061	14.4378	12.0038	11.8079	12.6916	123.959	93.6195	144.414	112.215	100.935	102.914				tr|B3LYC1|B3LYC1_DROAN	Uncharacterized protein, isoform A OS=Drosophila ananassae GN=Dana\GF17647 PE=4 SV=1	IPR033335:Microtubule-associated protein Jupiter
evm.model.Contig52.80	130.143	119.846	118.317	101.916	92.1981	72.6421	142.181	84.2825	114.379	434.537	438.788	330.56	150.125	143.566	102.797				tr|A0A0L0CK33|A0A0L0CK33_LUCCU	Uncharacterized protein OS=Lucilia cuprina GN=FF38_04522 PE=4 SV=1
evm.model.Contig31.214	335.528	341.888	401.894	94.5696	121.564	100.555	114.506	112.52	91.1158	126.639	84.364	118.752	100.665	80.3942	102.794	Abcf2	ABCF2_MOUSE	ATP-binding cassette sub-family F member 2 OS=Mus musculus GN=Abcf2 PE=1 SV=1	tr|A0A0L0C710|A0A0L0C710_LUCCU	Uncharacterized protein OS=Lucilia cuprina GN=FF38_00402 PE=4 SV=1	IPR032781:ABC-transporter extension domain	GO:0005524	ATP binding
evm.model.Contig61.39	502.516	486.334	532.442	157.082	191.718	189.91	158.672	216.075	230.43	164.125	134.563	146.972	119.381	99.1197	102.769	Tal	TALDO_DROME	Probable transaldolase OS=Drosophila melanogaster GN=Tal PE=2 SV=2	tr|A0A0L0CN97|A0A0L0CN97_LUCCU	Transaldolase OS=Lucilia cuprina GN=FF38_10045 PE=3 SV=1	IPR004730:Transaldolase type 1	GO:0005975	carbohydrate metabolic process	path:ko00030	Pentose phosphate pathway
evm.model.Contig7.143	1833.23	1601.63	1601.59	1220.04	1310.46	1001.15	1042.26	1226.33	1082.68	51.7514	257.736	25.5466	86.4507	91.9198	102.649	VhaSFD	CYC_SARPE	Cytochrome c OS=Sarcophaga peregrina PE=1 SV=2	tr|A0A0L0CG59|A0A0L0CG59_LUCCU	Uncharacterized protein OS=Lucilia cuprina GN=FF38_14372 PE=3 SV=1	IPR009056:Cytochrome c-like domain	GO:0009055	electron carrier activity	path:ko00920,path:ko01524,path:ko02020,path:ko04115,path:ko04210,path:ko04214,path:ko04215,path:ko04932,path:ko05010,path:ko05012,path:ko05014,path:ko05016,path:ko05134,path:ko05145,path:ko05152,path:ko05161,path:ko05164,path:ko05167,path:ko05168,path:ko05200,path:ko05210,path:ko05222,path:ko05416	Sulfur metabolism|Platinum drug resistance|Two-component system|p53 signaling pathway|Apoptosis|Apoptosis - fly|Apoptosis - multiple species|Non-alcoholic fatty liver disease (NAFLD)|Alzheimer's disease|Parkinson's disease|Amyotrophic lateral sclerosis (ALS)|Huntington's disease|Legionellosis|Toxoplasmosis|Tuberculosis|Hepatitis B|Influenza A|Kaposi's sarcoma-associated herpesvirus infection|Herp…
evm.model.Contig24.176	45.0297	41.962	45.3681	33.2951	33.504	36.2273	33.8748	35.6103	37.6301	77.3479	48.1545	64.6722	106.763	119.126	102.628	Uchl5	UCHL5_MOUSE	Ubiquitin carboxyl-terminal hydrolase isozyme L5 OS=Mus musculus GN=Uchl5 PE=1 SV=2	tr|A0A0L0C8L0|A0A0L0C8L0_LUCCU	Ubiquitin carboxyl-terminal hydrolase OS=Lucilia cuprina GN=FF38_03139 PE=3 SV=1	IPR001578:Peptidase C12, ubiquitin carboxyl-terminal hydrolase	GO:0004843	thiol-dependent ubiquitin-specific protease activity
evm.model.Contig141.37	38.1494	40.1866	36.1449	115.916	71.7014	116.929	90.2487	86.1962	97.0258	157.507	158.075	180.09	138.609	124.896	102.624				tr|A0A0L0C3L6|A0A0L0C3L6_LUCCU	Uncharacterized protein OS=Lucilia cuprina GN=FF38_13018 PE=3 SV=1	IPR000215:Serpin family	GO:0005615	extracellular space
evm.model.Contig116.31	21.8333	24.3843	25.3811	10.6653	8.76103	7.91548	15.6302	17.261	17.5317	27.4066	18.3564	19.7096	96.0212	106.795	102.547				tr|A0A0L0C127|A0A0L0C127_LUCCU	Protein kinase shaggy OS=Lucilia cuprina GN=FF38_08245 PE=4 SV=1
evm.model.Contig155.6	205.095	211.4	236.357	156.838	147.374	119.912	201.916	185.549	179.267	191.042	173.283	172.266	99.2907	111.927	102.483	mthfsd	MTHSD_DANRE	Methenyltetrahydrofolate synthase domain-containing protein OS=Danio rerio GN=mthfsd PE=2 SV=1	tr|A0A1L8E8Z0|A0A1L8E8Z0_HAEIR	Putative 5-formyltetrahydrofolate cyclo-ligase (Fragment) OS=Haematobia irritans PE=4 SV=1	IPR002698:5-formyltetrahydrofolate cyclo-ligase
evm.model.Contig6.812	38.9366	31.228	38.0439	24.1624	31.0215	27.9726	109.298	149.262	147.991	178.533	52.5636	181.684	106.374	97.3024	102.188	hsdl2	HSDL2_XENTR	Hydroxysteroid dehydrogenase-like protein 2 OS=Xenopus tropicalis GN=hsdl2 PE=2 SV=1	tr|A0A0L0CB95|A0A0L0CB95_LUCCU	Uncharacterized protein OS=Lucilia cuprina GN=FF38_11555 PE=4 SV=1	IPR002347:Short-chain dehydrogenase/reductase SDR
evm.model.Contig189.26	354.01	361.907	350.476	417.169	413.941	338.042	503.452	476.665	536.947	901.544	1477.03	651.626	105.661	88.9964	102.148				tr|A0A0L0BRQ4|A0A0L0BRQ4_LUCCU	Uncharacterized protein (Fragment) OS=Lucilia cuprina GN=FF38_05314 PE=3 SV=1	IPR031107:Small heat shock protein HSP20
evm.model.Contig5.118	55.1622	60.2942	56.5328	607.148	389.571	497.998	82.0613	108.177	55.6121	5.32739	3.44788	4.2308	151.622	103.316	102.019	to	TAKT_DROME	Protein takeout OS=Drosophila melanogaster GN=to PE=2 SV=1	tr|A0A0L0BU35|A0A0L0BU35_LUCCU	Protein takeout OS=Lucilia cuprina GN=FF38_00786 PE=4 SV=1	IPR002350:Kazal domain	GO:0005515	protein binding
evm.model.Contig7.512	28.6617	23.9617	19.9628	5.86656	6.8886	6.90634	10.4844	13.6991	14.1446	185.937	87.4291	160.384	77.9187	83.1044	101.753	HMT3	HMT3_ARATH	Homocysteine S-methyltransferase 3 OS=Arabidopsis thaliana GN=HMT3 PE=1 SV=2	tr|A0A0L0BUE5|A0A0L0BUE5_LUCCU	Uncharacterized protein OS=Lucilia cuprina GN=FF38_08065 PE=4 SV=1	IPR003726:Homocysteine-binding domain			path:ko00270	Cysteine and methionine metabolism
evm.model.Contig84.48	0.427018	0	0.420546	0.237805	0.237822	0.206706	1.17305	13.706	56.585	228.397	148.677	107.383	158.651	102.013	101.421	Sema-1a	ARY1_CALVI	Arylphorin subunit A4 OS=Calliphora vicina PE=2 SV=1	tr|O18320|O18320_CALVI	Arylphorin OS=Calliphora vicina PE=4 SV=1	IPR013788:Hemocyanin/hexamerin
evm.model.Contig16.311	43.3544	43.5289	45.6284	44.5113	54.8081	49.4367	43.7451	43.1192	40.194	84.9576	53.3629	81.9007	109.42	121.775	101.237	TXNL1	TXNL1_HUMAN	Thioredoxin-like protein 1 OS=Homo sapiens GN=TXNL1 PE=1 SV=3	tr|A0A0L0CIM0|A0A0L0CIM0_LUCCU	Uncharacterized protein OS=Lucilia cuprina GN=FF38_00016 PE=4 SV=1	IPR013766:Thioredoxin domain	GO:0045454	cell redox homeostasis
evm.model.Contig47.63	109.037	98.3631	94.582	40.1735	50.1661	55.6457	45.0343	72.1222	77.3492	59.023	40.2344	50.0651	119.751	91.1281	101.083	COPZ1	COPZ1_BOVIN	Coatomer subunit zeta-1 OS=Bos taurus GN=COPZ1 PE=1 SV=2	tr|A0A0L0CCL3|A0A0L0CCL3_LUCCU	Uncharacterized protein OS=Lucilia cuprina GN=FF38_01433 PE=4 SV=1	IPR022775:AP complex, mu/sigma subunit
evm.model.Contig131.51	27.3325	28.747	26.9454	25.786	27.188	34.016	113.465	127.292	138.517	200.708	108.816	272.002	73.2366	77.2259	100.968	CG2145	ENDOU_DROME	Poly(U)-specific endoribonuclease homolog OS=Drosophila melanogaster GN=CG2145 PE=1 SV=1	tr|A0A0L0C871|A0A0L0C871_LUCCU	Putative poly(U)-specific endoribonuclease OS=Lucilia cuprina GN=FF38_09229 PE=4 SV=1	IPR018998:Endoribonuclease XendoU	GO:0016788	hydrolase activity, acting on ester bonds
evm.model.Contig25.96	24.3437	24.2198	24.123	21.4102	22.9006	18.779	47.3192	76.251	56.4375	239.642	104.333	181.858	102.051	97.5033	100.869				tr|A0A0L0CSP9|A0A0L0CSP9_LUCCU	Uncharacterized protein (Fragment) OS=Lucilia cuprina GN=FF38_00730 PE=4 SV=1	IPR032086:Protein of unknown function DUF4813
evm.model.Contig14.336	422.736	390.194	396.206	167.233	203.453	202.97	139.335	162.57	140.568	101.744	70.2535	76.6861	106.706	101.596	100.681	eIF-2alpha	IF2A_DROME	Eukaryotic translation initiation factor 2 subunit 1 OS=Drosophila melanogaster GN=eIF-2alpha PE=2 SV=1	tr|A0A0L0C3Z8|A0A0L0C3Z8_LUCCU	Eukaryotic translation initiation factor 2 subunit 1 OS=Lucilia cuprina GN=FF38_09265 PE=4 SV=1	IPR003029:S1 domain	GO:0003676	nucleic acid binding	path:ko03013,path:ko04138,path:ko04140,path:ko04141,path:ko04210,path:ko04932,path:ko05160,path:ko05162,path:ko05164,path:ko05168	RNA transport|Autophagy - yeast|Autophagy - animal|Protein processing in endoplasmic reticulum|Apoptosis|Non-alcoholic fatty liver disease (NAFLD)|Hepatitis C|Measles|Influenza A|Herpes simplex infection
evm.model.Contig18.138	0	0	0	0	0	0	0.514343	0	0	0.510733	0	0	35.191	119.682	100.333	Dll	VKT5_HAPSC	KappaPI-theraphotoxin-Hs1a OS=Haplopelma schmidti PE=2 SV=1	tr|A0A0L0BRU8|A0A0L0BRU8_LUCCU	Uncharacterized protein OS=Lucilia cuprina GN=FF38_12133 PE=4 SV=1	IPR002223:Pancreatic trypsin inhibitor Kunitz domain	GO:0004867	serine-type endopeptidase inhibitor activity
evm.model.Contig29.192	108.738	113.815	95.1868	37.8964	50.333	53.5424	200.843	355.811	433.926	46.7358	41.4181	44.1818	117.121	100.619	100.176	calub	CALUB_SALSA	Calumenin-B OS=Salmo salar GN=calub PE=2 SV=1	tr|A0A0L0C790|A0A0L0C790_LUCCU	Uncharacterized protein OS=Lucilia cuprina GN=FF38_05260 PE=4 SV=1	IPR027239:Calumenin	GO:0005509	calcium ion binding
evm.model.Contig55.49	5.11288	5.15174	4.08392	2.19837	3.01708	2.41034	21.1681	22.3924	21.5593	175.085	109.035	189.804	76.4516	99.031	100.087	Ece2	ECE2_MOUSE	Endothelin-converting enzyme 2 OS=Mus musculus GN=Ece2 PE=1 SV=2	tr|A0A0L0BYA0|A0A0L0BYA0_LUCCU	Uncharacterized protein OS=Lucilia cuprina GN=FF38_11935 PE=4 SV=1	IPR008753:Peptidase M13, N-terminal domain	GO:0007218	neuropeptide signaling pathway
evm.model.Contig104.3	249.846	267.068	300.081	160.465	155.703	129.9	168.195	208.961	176.218	198.147	144.736	152.195	92.1348	92.0266	100.026	Atpalpha	ATNA_DROME	Sodium/potassium-transporting ATPase subunit alpha OS=Drosophila melanogaster GN=Atpalpha PE=1 SV=3	tr|A0A1I8MBT1|A0A1I8MBT1_MUSDO	Sodium/potassium-transporting ATPase subunit alpha OS=Musca domestica GN=101893028 PE=3 SV=1	IPR004014:Cation-transporting P-type ATPase, N-terminal	GO:0005391	sodium:potassium-exchanging ATPase activity	path:ko04022,path:ko04024,path:ko04260,path:ko04261,path:ko04911,path:ko04918,path:ko04919,path:ko04925,path:ko04960,path:ko04961,path:ko04964,path:ko04970,path:ko04971,path:ko04972,path:ko04973,path:ko04974,path:ko04976,path:ko04978	cGMP-PKG signaling pathway|cAMP signaling pathway|Cardiac muscle contraction|Adrenergic signaling in cardiomyocytes|Insulin secretion|Thyroid hormone synthesis|Thyroid hormone signaling pathway|Aldosterone synthesis and secretion|Aldosterone-regulated sodium reabsorption|Endocrine and other factor-regulated calcium reabsorption|Proximal tubule bicarbonate reclamation|Salivary secretion|Gastric ac…
evm.model.Contig29.36	0.656891	0.983328	1.10243	2.04739	2.25128	0.797698	0.43531	0.107666	0.41429	8.80863	6.92018	7.92879	162.439	131.385	99.7815	Hsp27	HSP27_DROME	Heat shock protein 27 OS=Drosophila melanogaster GN=Hsp27 PE=1 SV=2	tr|A0A0L0CSL4|A0A0L0CSL4_LUCCU	Heat shock protein 27 OS=Lucilia cuprina GN=FF38_05992 PE=3 SV=1	IPR001436:Alpha crystallin/Heat shock protein
evm.model.Contig6.458	79.0564	78.5605	81.9939	38.464	43.0781	39.8863	57.9456	82.7083	92.1021	59.1695	45.7718	49.7968	114.227	112.541	99.6651	RPN2	RPN2_PONAB	Dolichyl-diphosphooligosaccharide--protein glycosyltransferase subunit 2 OS=Pongo abelii GN=RPN2 PE=2 SV=1	tr|A0A0L0CEA5|A0A0L0CEA5_LUCCU	XK-related protein OS=Lucilia cuprina GN=FF38_02282 PE=3 SV=1	IPR008814:Dolichyl-diphosphooligosaccharide--protein glycosyltransferase subunit Swp1	GO:0006487	protein N-linked glycosylation	path:ko00510,path:ko00513,path:ko04141	N-Glycan biosynthesis|Various types of N-glycan biosynthesis|Protein processing in endoplasmic reticulum
evm.model.Contig80.21	28.9604	27.9567	32.6832	17.6002	23.5287	15.9819	62.9028	50.3525	70.6814	141.681	76.5899	136.336	99.2302	96.6426	99.1118	Pgrmc2	PGRC2_RAT	Membrane-associated progesterone receptor component 2 OS=Rattus norvegicus GN=Pgrmc2 PE=1 SV=1	tr|T1P889|T1P889_MUSDO	Cytochrome b5-like protein OS=Musca domestica GN=101887715 PE=2 SV=1	IPR001199:Cytochrome b5-like heme/steroid binding domain
evm.model.Contig110.4	30.5569	27.1428	31.3191	20.6518	22.2777	21.4831	30.4148	36.9261	36.0368	94.6621	45.4245	98.1053	101.934	101.758	99.067	Scamp1	SCAM1_MOUSE	Secretory carrier-associated membrane protein 1 OS=Mus musculus GN=Scamp1 PE=1 SV=1	tr|A0A0L0BL73|A0A0L0BL73_LUCCU	Secretory carrier-associated membrane protein OS=Lucilia cuprina GN=FF38_00094 PE=3 SV=1	IPR007273:SCAMP	GO:0015031	protein transport
evm.model.Contig9.147	36.2676	27.7764	25.5402	155.955	76.6335	303.221	135.265	123.883	107.079	21.8029	15.7608	15.3632	77.6061	66.2327	99.0584	anon-3B1.2	CCCP_DROME	Circadian clock-controlled protein OS=Drosophila melanogaster GN=anon-3B1.2 PE=2 SV=2	tr|A0A0L0BWS2|A0A0L0BWS2_LUCCU	Uncharacterized protein OS=Lucilia cuprina GN=FF38_10543 PE=4 SV=1	IPR010562:Haemolymph juvenile hormone binding
evm.model.Contig17.246	179.855	131.288	147.255	56.9077	90.075	93.6956	292.322	347.899	340.219	122.973	67.8668	130.087	112.209	94.161	98.8227	CG40127	RNK_DROME	Ribonuclease kappa OS=Drosophila melanogaster GN=CG40127 PE=3 SV=1	tr|A0A0L0C314|A0A0L0C314_LUCCU	Ribonuclease kappa (Fragment) OS=Lucilia cuprina GN=FF38_11379 PE=4 SV=1	IPR026770:Ribonuclease kappa	GO:0004521	endoribonuclease activity
evm.model.Contig31.56	451.267	343.884	337.618	402.872	422.777	369.052	461.245	400.431	406.131	149.648	243.528	114.363	107.433	115.355	98.5933	NDUFA13	NDUAD_GORGO	NADH dehydrogenase [ubiquinone] 1 alpha subcomplex subunit 13 OS=Gorilla gorilla gorilla GN=NDUFA13 PE=2 SV=3	tr|A0A0L0BQL2|A0A0L0BQL2_LUCCU	Uncharacterized protein (Fragment) OS=Lucilia cuprina GN=FF38_02969 PE=4 SV=1	IPR009346:GRIM-19			path:ko00190,path:ko04714,path:ko04723,path:ko04932,path:ko05010,path:ko05012,path:ko05016	Oxidative phosphorylation|Thermogenesis|Retrograde endocannabinoid signaling|Non-alcoholic fatty liver disease (NAFLD)|Alzheimer's disease|Parkinson's disease|Huntington's disease
evm.model.Contig132.96	217.975	224.718	251.395	59.3654	67.9323	63.8013	85.4183	101.938	96.7837	84.0179	51.8146	73.9984	97.8458	88.0924	98.5373	eRF1	ERF1_DROME	Eukaryotic peptide chain release factor subunit 1 OS=Drosophila melanogaster GN=eRF1 PE=1 SV=2	tr|A0A0L0C745|A0A0L0C745_LUCCU	Eukaryotic peptide chain release factor subunit 1 OS=Lucilia cuprina GN=FF38_06254 PE=4 SV=1	IPR005140:eRF1 domain 1/Pelota-like	GO:0003747	translation release factor activity	path:ko03015	mRNA surveillance pathway
evm.model.Contig136.7	0	0	0.0699826	0	0.0777812	0.151001	0	0	0	0.073693	0	0.31518	143.492	216.615	98.4184				tr|A0A1I8ML90|A0A1I8ML90_MUSDO	Uncharacterized protein OS=Musca domestica GN=101890387 PE=4 SV=1	IPR002350:Kazal domain	GO:0005515	protein binding
evm.model.Contig131.60	67.4879	65.0912	63.3294	3.8531	28.9376	7.11819	80.6502	94.3201	75.8201	190.913	8.90076	179.865	137.248	101.803	98.0654	CG32754	VNNL1_DROME	Vanin-like protein 1 OS=Drosophila melanogaster GN=CG32754 PE=1 SV=1	tr|A0A0L0CAJ8|A0A0L0CAJ8_LUCCU	Vanin-like protein 1 OS=Lucilia cuprina GN=FF38_09233 PE=4 SV=1	IPR003010:Carbon-nitrogen hydrolase	GO:0016811	hydrolase activity, acting on carbon-nitrogen (but not peptide bonds, in linear amides)	path:ko00770	Pantothenate and CoA biosynthesis
evm.model.Contig4.159	17.8004	12.2738	16.8821	5.24169	4.99393	7.00768	7.16819	12.8784	13.0777	11.6715	5.64642	9.29841	81.9425	74.4833	97.9584	SLC27A4	S27A4_HUMAN	Long-chain fatty acid transport protein 4 OS=Homo sapiens GN=SLC27A4 PE=1 SV=1	tr|A0A0L0BRG2|A0A0L0BRG2_LUCCU	Uncharacterized protein OS=Lucilia cuprina GN=FF38_04502 PE=4 SV=1	IPR000873:AMP-dependent synthetase/ligase	GO:0003824	catalytic activity	path:ko03320,path:ko04931	PPAR signaling pathway|Insulin resistance
evm.model.Contig87.38	85.8976	80.5405	67.3194	43.6879	59.2616	56.3724	49.3353	36.9182	37.9452	90.274	59.488	97.4602	90.6371	87.4617	97.5861				tr|A0A0L0CMJ4|A0A0L0CMJ4_LUCCU	Uncharacterized protein OS=Lucilia cuprina GN=FF38_09842 PE=4 SV=1
evm.model.Contig37.140	19.6222	22.3002	24.0838	23.5122	13.4612	11.9392	77.8784	30.8963	42.5865	154.95	87.0528	136.941	102.775	120.21	97.4215	PDCD4	PDCD4_CHICK	Programmed cell death protein 4 OS=Gallus gallus GN=PDCD4 PE=2 SV=1	tr|A0A0L0C0V7|A0A0L0C0V7_LUCCU	Uncharacterized protein (Fragment) OS=Lucilia cuprina GN=FF38_08125 PE=4 SV=1	IPR003891:Initiation factor eIF-4 gamma, MA3			path:ko05205,path:ko05206	Proteoglycans in cancer|MicroRNAs in cancer
evm.model.Contig6.860	10.9931	9.65139	10.6237	26.379	14.5896	35.779	7.3517	9.52993	8.87393	5.58123	6.25024	8.03693	134.837	92.5403	97.2126	CG8399	FRRS1_DROME	Putative ferric-chelate reductase 1 homolog OS=Drosophila melanogaster GN=CG8399 PE=2 SV=1	tr|A0A0L0CBB6|A0A0L0CBB6_LUCCU	Putative ferric-chelate reductase 1 OS=Lucilia cuprina GN=FF38_11516 PE=4 SV=1	IPR002861:Reeler domain
evm.model.Contig1.782	377.021	302.52	292.109	327.383	328.527	282.271	353.09	341.921	327.2	143.321	190.445	103.168	97.454	108.1	96.414	Y94H6A.8	NDUAC_CAEEL	Probable NADH dehydrogenase [ubiquinone] 1 alpha subcomplex subunit 12 OS=Caenorhabditis elegans GN=Y94H6A.8 PE=3 SV=2	tr|A0A1L8EHE4|A0A1L8EHE4_HAEIR	NADH dehydrogenase [ubiquinone] 1 alpha subcomplex subunit 12 OS=Haematobia irritans PE=3 SV=1	IPR007763:NADH dehydrogenase [ubiquinone] 1 alpha subcomplex subunit 12	GO:0008137	NADH dehydrogenase (ubiquinone activity)	path:ko00190,path:ko04714,path:ko04723,path:ko04932,path:ko05010,path:ko05012,path:ko05016	Oxidative phosphorylation|Thermogenesis|Retrograde endocannabinoid signaling|Non-alcoholic fatty liver disease (NAFLD)|Alzheimer's disease|Parkinson's disease|Huntington's disease
evm.model.Contig106.81	63.6854	68.7228	87.658	29.4923	29.2402	23.0578	19.0723	31.4832	22.0481	64.528	39.3839	56.4096	96.4473	96.8772	96.2756	lig	LIG_DROPS	Protein lingerer OS=Drosophila pseudoobscura pseudoobscura GN=lig PE=3 SV=3	tr|T1PL72|T1PL72_MUSDO	Uncharacterized protein OS=Musca domestica PE=2 SV=1	IPR015940:Ubiquitin-associated domain
evm.model.Contig266.5	5.07456	7.59878	5.07806	0.180824	0.179665	0	0	0	0	51.113	0.185713	3.65029	1.6632	8.78911	96.0961				tr|A0A0L0CJ52|A0A0L0CJ52_LUCCU	Uncharacterized protein OS=Lucilia cuprina GN=FF38_06625 PE=4 SV=1
evm.model.Contig53.178	0.360779	0.764899	0.768647	0.7326	0.856615	0.331249	1.16663	0.575923	0.951128	12.6849	8.93168	11.6871	114.092	103.889	95.9943	KLHL5	KLHL5_HUMAN	Kelch-like protein 5 OS=Homo sapiens GN=KLHL5 PE=2 SV=3	tr|A0A1I8Q1F0|A0A1I8Q1F0_STOCA	Uncharacterized protein OS=Stomoxys calcitrans GN=106083014 PE=4 SV=1	IPR000210:BTB/POZ domain	GO:0005515	protein binding
evm.model.Contig92.38	7.32893	9.09596	10.8541	5.00184	2.9674	3.25512	1.31766	1.48405	0.779759	13.2242	14.2101	9.26599	141.634	160.828	95.8364	scyl	SCLLA_DROME	Protein scylla OS=Drosophila melanogaster GN=scyl PE=2 SV=1	tr|A0A0L0C7V9|A0A0L0C7V9_LUCCU	Protein scylla OS=Lucilia cuprina GN=FF38_05779 PE=4 SV=1	IPR012918:RTP801-like	GO:0005737	cytoplasm
evm.model.Contig40.215	25.364	29.5081	27.8076	60.4101	64.9666	32.8133	121.568	77.892	116.427	262.062	326.138	282.628	132.13	113.133	95.8105				tr|A0A0L0BXH5|A0A0L0BXH5_LUCCU	Uncharacterized protein (Fragment) OS=Lucilia cuprina GN=FF38_01009 PE=4 SV=1
evm.model.Contig36.22	79.5514	66.829	60.5606	90.274	76.5256	64.3013	74.8632	94.3413	59.7045	126.648	121.808	109.273	87.066	101.001	95.2002	FUNDC1	FUND1_BOVIN	FUN14 domain-containing protein 1 OS=Bos taurus GN=FUNDC1 PE=2 SV=1	tr|A0A0L0BZB8|A0A0L0BZB8_LUCCU	Uncharacterized protein OS=Lucilia cuprina GN=FF38_13705 PE=4 SV=1	IPR007014:FUN14			path:ko04137	Mitophagy - animal
evm.model.Contig6.556	4.26207	3.31779	2.33707	0.627377	1.8771	1.42087	29.1374	38.8882	21.857	148.748	76.913	133.157	94.4012	94.5065	94.6716	Scarb1	SCRB1_RAT	Scavenger receptor class B member 1 OS=Rattus norvegicus GN=Scarb1 PE=1 SV=1	tr|A0A0L0CBP2|A0A0L0CBP2_LUCCU	Uncharacterized protein OS=Lucilia cuprina GN=FF38_08694 PE=3 SV=1	IPR002159:CD36 family	GO:0016020	membrane
evm.model.Contig92.66	21.2962	27.7675	28.5274	7.8304	9.96024	8.4323	6.35232	7.88699	8.07837	50.661	43.5021	38.156	95.5555	114.205	94.6444	scyl	SCLLA_DROME	Protein scylla OS=Drosophila melanogaster GN=scyl PE=2 SV=1	tr|A0A0L0C0V6|A0A0L0C0V6_LUCCU	Protein scylla OS=Lucilia cuprina GN=FF38_04640 PE=4 SV=1	IPR012918:RTP801-like	GO:0005737	cytoplasm
evm.model.Contig84.47	0.454649	0	0.226553	0.4362	0.284553	0.132303	0.574461	19.6788	30.2616	192.167	221.797	315.302	190.897	117.467	94.3758	Sema-1a	ARY1_CALVI	Arylphorin subunit A4 OS=Calliphora vicina PE=2 SV=1	tr|O18321|O18321_CALVI	Arylphorin OS=Calliphora vicina PE=2 SV=1	IPR013788:Hemocyanin/hexamerin
evm.model.Contig25.94	4.50081	1.65158	1.94454	0.525404	0.393287	0.520563	1.13205	4.75112	2.8536	284.997	92.6418	215.434	110.119	83.318	94.3082				tr|A0A0L0CPZ4|A0A0L0CPZ4_LUCCU	Uncharacterized protein OS=Lucilia cuprina GN=FF38_00725 PE=4 SV=1
evm.model.Contig31.98	25.7082	27.684	27.9145	25.4935	18.4975	21.7542	57.3424	66.5853	57.058	95.6775	48.0678	71.8315	111.653	112.959	94.2452				tr|A0A0L0BTY8|A0A0L0BTY8_LUCCU	Uncharacterized protein OS=Lucilia cuprina GN=FF38_04780 PE=4 SV=1	IPR032086:Protein of unknown function DUF4813
evm.model.Contig1.107	79.5243	67.3776	70.5868	38.4126	45.6746	44.1092	57.185	88.4111	98.4447	62.6018	43.6217	52.3638	113.598	108.771	94.1306	Tusc3	TUSC3_MOUSE	Tumor suppressor candidate 3 OS=Mus musculus GN=Tusc3 PE=1 SV=1	tr|A0A0L0CFR3|A0A0L0CFR3_LUCCU	Uncharacterized protein OS=Lucilia cuprina GN=FF38_03918 PE=4 SV=1	IPR021149:Oligosaccharyl transferase complex, subunit OST3/OST6			path:ko00510,path:ko00513,path:ko04141	N-Glycan biosynthesis|Various types of N-glycan biosynthesis|Protein processing in endoplasmic reticulum
evm.model.Contig19.240	378.402	348.202	365.848	334.884	353.701	341.212	405.558	527.195	447.048	37.9539	53.1582	41.6864	68.6966	69.7218	94.0356	acat1-b	THILB_XENLA		tr|A0A0L0BRE9|A0A0L0BRE9_LUCCU	Uncharacterized protein OS=Lucilia cuprina GN=FF38_00176 PE=3 SV=1	IPR020617:Thiolase, C-terminal	GO:0008152	metabolic process	path:ko00071,path:ko00072,path:ko00280,path:ko00310,path:ko00362,path:ko00380,path:ko00620,path:ko00630,path:ko00640,path:ko00650,path:ko00720,path:ko00900,path:ko02020	Fatty acid degradation|Synthesis and degradation of ketone bodies|Valine, leucine and isoleucine degradation|Lysine degradation|Benzoate degradation|Tryptophan metabolism|Pyruvate metabolism|Glyoxylate and dicarboxylate metabolism|Propanoate metabolism|Butanoate metabolism|Carbon fixation pathways in prokaryotes|Terpenoid backbone biosynthesis|Two-component system
evm.model.Contig24.182	16.7778	13.6847	7.28523	4.40754	5.50475	5.01501	24.706	19.2664	19.0145	92.3117	33.3366	133.695	56.5091	88.3011	94.0165				tr|A0A0L0CLI7|A0A0L0CLI7_LUCCU	Uncharacterized protein OS=Lucilia cuprina GN=FF38_06235 PE=4 SV=1	IPR005521:Attacin, C-terminal	GO:0005576	extracellular region
evm.model.Contig7.60	52.6548	49.5843	54.5158	27.3341	35.2684	30.2349	41.6411	71.6479	85.5892	88.6084	64.8437	87.8825	112.924	97.297	93.9887	TMEM214	TM214_HUMAN	Transmembrane protein 214 OS=Homo sapiens GN=TMEM214 PE=1 SV=2	tr|A0A0L0CDM6|A0A0L0CDM6_LUCCU	Uncharacterized protein OS=Lucilia cuprina GN=FF38_03942 PE=4 SV=1	IPR019308:Transmembrane protein 214
evm.model.Contig101.80	4.35442	5.1765	3.93647	7.05735	5.87191	5.17706	3.46152	4.39744	3.05507	2.84928	2.31027	2.27667	99.8208	113.084	93.7978	Sbk1	SBK1_RAT	Serine/threonine-protein kinase SBK1 OS=Rattus norvegicus GN=Sbk1 PE=1 SV=1	tr|A0A0L0BLK9|A0A0L0BLK9_LUCCU	Uncharacterized protein OS=Lucilia cuprina GN=FF38_00311 PE=4 SV=1	IPR000719:Protein kinase domain	GO:0004672	protein kinase activity
evm.model.Contig34.86	4.01988	4.44872	3.80438	6.23708	7.4177	5.01878	13.6028	7.71448	10.0511	136.51	64.1516	177.078	106.645	119.316	93.7339	Mal-A3	MAL3_DROME	Maltase A3 OS=Drosophila melanogaster GN=Mal-A3 PE=2 SV=2	tr|A0A1I8Q8N4|A0A1I8Q8N4_STOCA	Uncharacterized protein OS=Stomoxys calcitrans GN=106089598 PE=4 SV=1	IPR006047:Glycosyl hydrolase, family 13, catalytic domain	GO:0003824	catalytic activity
evm.model.Contig33.52	248.037	278.864	305.049	185.481	207.835	188.914	95.2513	119.637	98.9298	64.9599	47.715	54.0837	95.9839	84.0471	93.452	T-cp1	TCPA_DROME	T-complex protein 1 subunit alpha OS=Drosophila melanogaster GN=T-cp1 PE=2 SV=2	tr|A0A0L0BY42|A0A0L0BY42_LUCCU	T-complex protein 1 subunit alpha OS=Lucilia cuprina GN=FF38_11889 PE=3 SV=1	IPR017998:Chaperone tailless complex polypeptide 1 (TCP-1)	GO:0005524	ATP binding
evm.model.Contig56.77	21.9522	30.5588	29.3861	33.6474	25.2758	22.1254	8.88352	5.91326	6.70888	35.3357	29.6167	21.9435	81.2767	79.8826	93.2609	Cirl	LPHN_DROPE	Latrophilin Cirl OS=Drosophila persimilis GN=Cirl PE=3 SV=1	tr|Q3ZLS4|Q3ZLS4_LUCCU	Latrophilin-like receptor (Fragment) OS=Lucilia cuprina GN=Lt PE=2 SV=1	IPR017981:GPCR, family 2-like	GO:0004888	transmembrane signaling receptor activity
evm.model.Contig78.15	15.6827	11.4085	9.49103	8.24257	4.34096	3.02597	9.41399	5.93248	10.3916	44.7805	23.0092	28.4871	125.659	87.8901	92.079	Yippee	YIPP_DROME	Protein yippee OS=Drosophila melanogaster GN=Yippee PE=1 SV=1	tr|A0A1I8PPH6|A0A1I8PPH6_STOCA	Protein yippee-like OS=Stomoxys calcitrans GN=106090323 PE=3 SV=1	IPR004910:Yippee/Mis18/Cereblon
evm.model.Contig18.41	239.502	222.392	248.138	97.8282	103.042	115.611	116.82	137.274	130.969	70.2921	86.9041	52.1402	96.8816	107.339	92.0352	Pabp2	PABP2_DROPS	Polyadenylate-binding protein 2 OS=Drosophila pseudoobscura pseudoobscura GN=Pabp2 PE=3 SV=1	tr|A0A0L0BPH2|A0A0L0BPH2_LUCCU	Polyadenylate-binding protein 2 OS=Lucilia cuprina GN=FF38_12087 PE=4 SV=1	IPR034911:Polyadenylate-binding protein 2	GO:0003676	nucleic acid binding	path:ko03015,path:ko05164	mRNA surveillance pathway|Influenza A
evm.model.Contig11.134	29.8257	15.7123	23.6536	4.67918	11.3374	5.73878	0	5.62602	4.02459	12.4257	6.40081	23.4853	138.176	107.123	92.0124	ade3	PUR2_DROPS	Trifunctional purine biosynthetic protein adenosine-3 OS=Drosophila pseudoobscura pseudoobscura GN=ade3 PE=3 SV=2	tr|A0A0L0BVF6|A0A0L0BVF6_LUCCU	Trifunctional purine biosynthetic protein adenosine-3 OS=Lucilia cuprina GN=FF38_00229 PE=3 SV=1	IPR020562:Phosphoribosylglycinamide synthetase, N-terminal	GO:0004637	phosphoribosylamine-glycine ligase activity	path:ko00230,path:ko00670,path:ko01523	Purine metabolism|One carbon pool by folate|Antifolate resistance
evm.model.Contig185.21	29.374	26.2753	28.975	13.8196	15.3118	17.3223	24.008	29.0419	28.9106	76.2898	37.6428	57.187	78.0177	83.6612	91.656	RNF185	RN185_CHICK	E3 ubiquitin-protein ligase RNF185 OS=Gallus gallus GN=RNF185 PE=2 SV=1	tr|A0A0L0CK90|A0A0L0CK90_LUCCU	Uncharacterized protein (Fragment) OS=Lucilia cuprina GN=FF38_05036 PE=4 SV=1	IPR001841:Zinc finger, RING-type			path:ko04141	Protein processing in endoplasmic reticulum
evm.model.Contig7.447	347.055	325.815	358.512	2066.48	1620.21	2676.28	869.021	1316.96	1067.43	278.741	1049.24	325.629	126.192	110.519	91.5015				tr|A0A0L0CI81|A0A0L0CI81_LUCCU	Uncharacterized protein OS=Lucilia cuprina GN=FF38_14292 PE=4 SV=1	IPR001304:C-type lectin-like
evm.model.Contig44.178	18.4745	25.0816	16.4383	12.3482	12.7728	9.22943	19.9163	13.6255	23.39	60.505	32.2636	61.2111	89.269	98.6108	91.4684	Spec2	C42ES_DROME	CDC42 small effector protein homolog OS=Drosophila melanogaster GN=Spec2 PE=1 SV=2	tr|A0A0L0CLY9|A0A0L0CLY9_LUCCU	Putative CDC42 small effector protein OS=Lucilia cuprina GN=FF38_01997 PE=4 SV=1	IPR000095:CRIB domain
evm.model.Contig2.870	4760.94	5191.76	4273.91	14323	13340.8	9955.45	13868.7	9696.15	10796	5022.24	12276.2	3884.24	193.549	165.177	91.4625	Mlc2	MLR_DROME	Myosin regulatory light chain 2 OS=Drosophila melanogaster GN=Mlc2 PE=1 SV=2	tr|B4K821|B4K821_DROMO	Uncharacterized protein (Fragment) OS=Drosophila mojavensis GN=Dmoj\GI23377 PE=4 SV=2	IPR002048:EF-hand domain	GO:0005509	calcium ion binding
evm.model.Contig64.102	8.91995	6.84842	7.76296	30.0314	34.1083	30.7053	64.8431	79.58	52.948	24.0506	25.1334	32.7204	86.1097	95.6195	91.4471	Qpct	QPCT_MOUSE	Glutaminyl-peptide cyclotransferase OS=Mus musculus GN=Qpct PE=1 SV=2	tr|A0A1I8NDX4|A0A1I8NDX4_MUSDO	Uncharacterized protein OS=Musca domestica GN=101893544 PE=4 SV=1	IPR007484:Peptidase M28
evm.model.Contig13.210	271.868	258.095	287.167	110.363	133.474	135.874	95.9073	140.057	124.463	70.1546	55.8952	59.2974	96.3539	91.438	91.3529	Abce1	ABCE1_MOUSE	ATP-binding cassette sub-family E member 1 OS=Mus musculus GN=Abce1 PE=1 SV=1	tr|A0A0L0CKD0|A0A0L0CKD0_LUCCU	Uncharacterized protein OS=Lucilia cuprina GN=FF38_13257 PE=4 SV=1	IPR034348:RLI, domain 1	GO:0005524	ATP binding
evm.model.Contig117.72	179.335	159.986	163.543	319.396	308.041	547.163	242.327	299.512	234.931	13.6981	31.4645	11.6998	64.9872	93.5074	90.9574				tr|A0A0L0BWH4|A0A0L0BWH4_LUCCU	Uncharacterized protein OS=Lucilia cuprina GN=FF38_00958 PE=4 SV=1	IPR002557:Chitin binding domain	GO:0005576	extracellular region
evm.model.Contig25.30	238.483	243.856	331.213	72.8982	97.2038	71.218	158.598	241.409	177.1	57.1166	67.5381	40.2689	93.0828	91.7326	90.9398	Sam-S	METK_DROME	S-adenosylmethionine synthase OS=Drosophila melanogaster GN=Sam-S PE=2 SV=2	tr|A0A1I8PNE2|A0A1I8PNE2_STOCA	S-adenosylmethionine synthase OS=Stomoxys calcitrans GN=106084809 PE=3 SV=1	IPR002133:S-adenosylmethionine synthetase	GO:0004478	methionine adenosyltransferase activity	path:ko00270	Cysteine and methionine metabolism
evm.model.Contig77.13	32.1845	21.8934	28.1868	17.2239	19.9323	15.7769	78.5445	90.8424	90.9069	197.504	157.197	193.422	102.424	107.851	90.6618	NPEPL1	PEPL1_HUMAN	Probable aminopeptidase NPEPL1 OS=Homo sapiens GN=NPEPL1 PE=1 SV=3	tr|A0A1L8EHK7|A0A1L8EHK7_HAEIR	Putative aminopeptidase npepl1 (Fragment) OS=Haematobia irritans PE=4 SV=1	IPR000819:Peptidase M17, leucyl aminopeptidase, C-terminal	GO:0004177	aminopeptidase activity
evm.model.Contig36.176	82.116	102.074	85.4233	81.3579	81.8037	75.3569	46.2186	50.8618	46.7344	66.3983	54.1312	52.595	99.1406	75.9338	90.5954	ADARB1	RED1_HUMAN	Double-stranded RNA-specific editase 1 OS=Homo sapiens GN=ADARB1 PE=1 SV=1	tr|A0A0L0C3S4|A0A0L0C3S4_LUCCU	Uncharacterized protein OS=Lucilia cuprina GN=FF38_10935 PE=4 SV=1	IPR014720:Double-stranded RNA-binding domain
evm.model.Contig71.51	39.4647	44.0976	44.8511	35.4216	48.3533	31.1937	99.2006	82.3809	102.094	179.215	69.0725	142.641	71.7662	41.0749	90.4755	PHYHD1	PHYD1_BOVIN	Phytanoyl-CoA dioxygenase domain-containing protein 1 OS=Bos taurus GN=PHYHD1 PE=2 SV=1	tr|A0A0L0CLL7|A0A0L0CLL7_LUCCU	Uncharacterized protein OS=Lucilia cuprina GN=FF38_06779 PE=4 SV=1	IPR008775:Phytanoyl-CoA dioxygenase
evm.model.Contig17.126	109.03	93.5682	96.0317	151.555	203.178	202.002	113.395	158.258	157.86	87.2058	54.0743	78.3797	72.7163	74.1207	90.3896	GST1	GSTT1_MANSE	Glutathione S-transferase 1 OS=Manduca sexta GN=GST1 PE=2 SV=1	tr|A0A0L0C3Y8|A0A0L0C3Y8_LUCCU	Uncharacterized protein (Fragment) OS=Lucilia cuprina GN=FF38_13061 PE=4 SV=1	IPR004046:Glutathione S-transferase, C-terminal	GO:0005515	protein binding	path:ko00480,path:ko00980,path:ko00982,path:ko00983,path:ko01524,path:ko05200,path:ko05204,path:ko05225,path:ko05418	Glutathione metabolism|Metabolism of xenobiotics by cytochrome P450|Drug metabolism - cytochrome P450|Drug metabolism - other enzymes|Platinum drug resistance|Pathways in cancer|Chemical carcinogenesis|Hepatocellular carcinoma|Fluid shear stress and atherosclerosis
evm.model.Contig8.509	293.035	281.332	325.61	69.7533	69.2573	81.6791	343.063	413.456	410.122	139.241	62.4643	106.155	89.1951	76.8979	90.2029	Atp6v0a1	VPP1_MOUSE	V-type proton ATPase 116 kDa subunit a isoform 1 OS=Mus musculus GN=Atp6v0a1 PE=1 SV=3	tr|A0A1I8NRD1|A0A1I8NRD1_STOCA	V-type proton ATPase subunit a OS=Stomoxys calcitrans GN=106092567 PE=3 SV=1	IPR002490:V-type ATPase, V0 complex, 116kDa subunit family	GO:0015078	hydrogen ion transmembrane transporter activity	path:ko00190,path:ko04142,path:ko04145,path:ko04721,path:ko04966,path:ko05110,path:ko05120,path:ko05152,path:ko05165,path:ko05323	Oxidative phosphorylation|Lysosome|Phagosome|Synaptic vesicle cycle|Collecting duct acid secretion|Vibrio cholerae infection|Epithelial cell signaling in Helicobacter pylori infection|Tuberculosis|Human papillomavirus infection|Rheumatoid arthritis
evm.model.Contig6.426	34.0608	27.9041	39.7576	64.7216	30.3903	49.0945	164.252	108.289	156.973	63.0833	35.0554	72.3575	71.3003	62.735	90.1625				tr|A0A0L0C2U0|A0A0L0C2U0_LUCCU	Uncharacterized protein OS=Lucilia cuprina GN=FF38_09968 PE=3 SV=1	IPR000215:Serpin family	GO:0005615	extracellular space	path:ko05146	Amoebiasis
evm.model.Contig1.788	6.82118	8.28361	9.00664	5.57638	5.91746	3.93949	9.49205	10.9198	9.92188	40.4394	14.9994	49.8544	92.1447	89.0026	89.8583	Hrs	HRS_DROME	Hepatocyte growth factor-regulated tyrosine kinase substrate OS=Drosophila melanogaster GN=Hrs PE=1 SV=1	tr|A0A0L0CMP8|A0A0L0CMP8_LUCCU	Uncharacterized protein OS=Lucilia cuprina GN=FF38_05821 PE=4 SV=1	IPR024641:Hepatocyte growth factor-regulated tyrosine kinase substrate, helical domain			path:ko04144,path:ko04145	Endocytosis|Phagosome
evm.model.Contig21.57	8.73141	10.6974	12.7229	6.32534	6.59388	4.529	4.61126	5.70394	4.52473	8.33989	4.71144	7.60456	96.8929	69.0428	89.8153	RPTOR	RPTOR_HUMAN	Regulatory-associated protein of mTOR OS=Homo sapiens GN=RPTOR PE=1 SV=1	tr|A0A0L0CR32|A0A0L0CR32_LUCCU	Uncharacterized protein OS=Lucilia cuprina GN=FF38_10284 PE=3 SV=1	IPR004083:Regulatory associated protein of TOR	GO:0031929	TOR signaling	path:ko04136,path:ko04138,path:ko04140,path:ko04150,path:ko04151,path:ko04152,path:ko04211,path:ko04213,path:ko04714,path:ko04910,path:ko05206	Autophagy - other|Autophagy - yeast|Autophagy - animal|mTOR signaling pathway|PI3K-Akt signaling pathway|AMPK signaling pathway|Longevity regulating pathway|Longevity regulating pathway - multiple species|Thermogenesis|Insulin signaling pathway|MicroRNAs in cancer
evm.model.Contig91.8	10.066	13.0632	12.8999	16.798	17.1123	11.7448	20.9641	23.9125	24.1213	61.2267	41.2576	52.9299	83.0063	82.4652	89.7789				tr|A0A0L0CGH2|A0A0L0CGH2_LUCCU	205 kDa microtubule-associated protein OS=Lucilia cuprina GN=FF38_12760 PE=4 SV=1
evm.model.Contig6.555	10.1441	7.23496	10.0774	12.4109	8.52964	19.669	13.9415	14.2562	15.7714	54.8075	38.6933	40.395	92.3115	94.3262	89.5498	SCARB1	SCRB1_BOVIN	Scavenger receptor class B member 1 OS=Bos taurus GN=SCARB1 PE=2 SV=1	tr|A0A0L0CBL7|A0A0L0CBL7_LUCCU	Uncharacterized protein OS=Lucilia cuprina GN=FF38_08689 PE=3 SV=1	IPR002159:CD36 family	GO:0016020	membrane
evm.model.Contig9.377	18.6901	14.9046	17.4714	63.679	58.6318	45.2004	58.5117	59.4484	73.1237	80.4617	124.538	59.6032	110.431	104.202	88.6374				tr|A0A0L0BP31|A0A0L0BP31_LUCCU	Uncharacterized protein OS=Lucilia cuprina GN=FF38_04002 PE=4 SV=1	IPR002818:DJ-1/PfpI			path:ko05012	Parkinson's disease
evm.model.Contig9.56	35.2274	43.323	35.4232	90.5637	82.6637	73.4749	85.049	72.3885	93.52	63.26	101.46	36.0121	100.283	102.282	88.2116				tr|A0A0L0CD48|A0A0L0CD48_LUCCU	Uncharacterized protein OS=Lucilia cuprina GN=FF38_07656 PE=4 SV=1	IPR008580:PPPDE putative peptidase domain
evm.model.Contig77.24	3.65195	2.77474	3.82305	3.23046	2.65691	2.30407	6.74231	6.12329	7.11119	52.2092	28.1199	58.1671	100.962	95.95	88.1071	Drice	DRICE_DROME	Caspase OS=Drosophila melanogaster GN=Drice PE=1 SV=2	tr|A0A0L0BTI1|A0A0L0BTI1_LUCCU	Caspase OS=Lucilia cuprina GN=FF38_13466 PE=3 SV=1	IPR002138:Peptidase C14, caspase non-catalytic subunit p10	GO:0008234	cysteine-type peptidase activity
evm.model.Contig7.558	19.8642	27.5408	22.1198	817.479	632.218	519.265	104.043	173.524	119.116	27.7527	1.82559	15.9517	87.7272	81.5812	87.9487	chtf18	CSTI_BOMMO	Trypsin inhibitor OS=Bombyx mori PE=1 SV=1	tr|A0A0L0BX25|A0A0L0BX25_LUCCU	Uncharacterized protein OS=Lucilia cuprina GN=FF38_09646 PE=4 SV=1	IPR002223:Pancreatic trypsin inhibitor Kunitz domain	GO:0004867	serine-type endopeptidase inhibitor activity
evm.model.Contig6.542	40.7238	42.4251	42.8346	2.37974	4.12623	2.75621	14.4871	21.3271	16.7172	36.7459	9.11012	32.7723	83.7325	60.8576	87.897	SCARB1	SCRB1_PIG	Scavenger receptor class B member 1 OS=Sus scrofa GN=SCARB1 PE=2 SV=1	tr|A0A0L0BQK5|A0A0L0BQK5_LUCCU	Uncharacterized protein OS=Lucilia cuprina GN=FF38_12904 PE=3 SV=1	IPR002159:CD36 family	GO:0016020	membrane
evm.model.Contig1.96	271.892	266.075	303.154	186.186	218.861	190.823	117.639	149.779	119.773	67.9027	59.8889	55.8484	93.2364	82.2493	87.8344	Mapkbp1	TCPD_OCHTR	T-complex protein 1 subunit delta OS=Ochlerotatus triseriatus PE=2 SV=1	tr|A0A0L0CII4|A0A0L0CII4_LUCCU	T-complex protein 1 subunit delta OS=Lucilia cuprina GN=FF38_14342 PE=3 SV=1	IPR017998:Chaperone tailless complex polypeptide 1 (TCP-1)	GO:0005524	ATP binding
evm.model.Contig70.121	10.5189	9.34124	8.13726	9.13489	9.81774	9.21452	12.8878	17.9474	15.2654	37.3507	26.4783	41.7644	94.179	62.1856	87.8024	Trex2	TREX2_MOUSE	Three prime repair exonuclease 2 OS=Mus musculus GN=Trex2 PE=2 SV=1	tr|A0A0L0BSD8|A0A0L0BSD8_LUCCU	Uncharacterized protein OS=Lucilia cuprina GN=FF38_10911 PE=4 SV=1	IPR013520:Exonuclease, RNase T/DNA polymerase III
evm.model.Contig34.207	10.0744	7.1929	13.1615	1.26766	1.47593	0	258.345	70.11	114.777	2.269	11.8457	1.51657	13.2459	28.8029	86.989	Fmnl1	LYS1_MUSDO	Lysozyme 1 OS=Musca domestica PE=1 SV=1	tr|A0A1I8MSX2|A0A1I8MSX2_MUSDO	Lysozyme OS=Musca domestica GN=101894169 PE=3 SV=1	IPR001916:Glycoside hydrolase, family 22	GO:0003796	lysozyme activity	path:ko04970	Salivary secretion
evm.model.Contig1.43	175.618	180.293	187.75	103.587	130.811	131.874	50.5206	84.2277	69.6623	75.2222	61.2626	54.5731	97.9186	90.4992	86.7604	ube2i	UBC9_XENTR	SUMO-conjugating enzyme UBC9 OS=Xenopus tropicalis GN=ube2i PE=2 SV=1	tr|A0A1W4UQT5|A0A1W4UQT5_DROFC	SUMO-conjugating enzyme OS=Drosophila ficusphila GN=LOC108091566 PE=3 SV=1	IPR027230:SUMO-conjugating enzyme Ubc9	GO:0019789	SUMO transferase activity	path:ko03013,path:ko04064,path:ko04120,path:ko05206	RNA transport|NF-kappa B signaling pathway|Ubiquitin mediated proteolysis|MicroRNAs in cancer
evm.model.Contig47.140	189.752	172.994	148.415	220.848	240.084	199.95	200.302	186.563	180.966	75.7115	91.5239	58.0198	98.7124	83.738	86.6969	ND-ACP	ACPM_DROME	Acyl carrier protein, mitochondrial OS=Drosophila melanogaster GN=ND-ACP PE=2 SV=1	tr|A0A0L0BSZ1|A0A0L0BSZ1_LUCCU	Acyl carrier protein (Fragment) OS=Lucilia cuprina GN=FF38_02474 PE=3 SV=1	IPR009081:Phosphopantetheine binding ACP domain	GO:0006633	fatty acid biosynthetic process	path:ko00190,path:ko04714,path:ko04723,path:ko04932,path:ko05010,path:ko05012,path:ko05016	Oxidative phosphorylation|Thermogenesis|Retrograde endocannabinoid signaling|Non-alcoholic fatty liver disease (NAFLD)|Alzheimer's disease|Parkinson's disease|Huntington's disease
evm.model.Contig15.290	132.336	128.504	125.489	138.022	128.314	105.234	217.647	174.191	209.58	250.948	227.332	211.12	87.1059	84.7133	86.591	SUCLA2	SUCB1_BOVIN	Succinyl-CoA ligase [ADP-forming] subunit beta, mitochondrial OS=Bos taurus GN=SUCLA2 PE=2 SV=1	tr|A0A0L0CLN1|A0A0L0CLN1_LUCCU	Succinate--CoA ligase [ADP-forming] subunit beta, mitochondrial OS=Lucilia cuprina GN=FF38_12724 PE=3 SV=1	IPR011761:ATP-grasp fold	GO:0003824	catalytic activity	path:ko00020,path:ko00640	Citrate cycle (TCA cycle)|Propanoate metabolism
evm.model.Contig74.94	141.594	184.552	200.201	86.175	107.688	84.9439	31.1299	45.2485	39.0751	65.733	53.4814	57.5387	92.3777	86.5323	86.2776	nonA	NONA_DROVI	Protein no-on-transient A OS=Drosophila virilis GN=nonA PE=2 SV=1	tr|A0A0L0C3X0|A0A0L0C3X0_LUCCU	Uncharacterized protein OS=Lucilia cuprina GN=FF38_02335 PE=4 SV=1	IPR000504:RNA recognition motif domain	GO:0003676	nucleic acid binding
evm.model.Contig6.904	30.4917	25.4638	18.7105	33.9617	27.0567	29.9116	31.0913	26.1923	20.4972	79.7524	66.3247	79.3599	79.8576	92.5409	86.1852	leprot	OBRG_TAKRU	Leptin receptor gene-related protein OS=Takifugu rubripes GN=leprot PE=2 SV=1	tr|A0A0L0CEN2|A0A0L0CEN2_LUCCU	Uncharacterized protein OS=Lucilia cuprina GN=FF38_01612 PE=4 SV=1	IPR007262:Vacuolar protein sorting 55
evm.model.Contig6.43	77.1744	78.7406	100.388	35.0873	33.974	33.5152	25.3127	34.3356	30.8448	100.6	59.2895	81.1698	73.4179	80.8312	85.9986	EIF4G2	IF4G2_PONAB	Eukaryotic translation initiation factor 4 gamma 2 OS=Pongo abelii GN=EIF4G2 PE=2 SV=2	tr|A0A0L0C7M3|A0A0L0C7M3_LUCCU	Uncharacterized protein (Fragment) OS=Lucilia cuprina GN=FF38_13166 PE=4 SV=1	IPR003890:MIF4G-like, type 3	GO:0005515	protein binding	path:ko03013,path:ko05416	RNA transport|Viral myocarditis
evm.model.Contig20.33	292.875	183.195	249.542	35.8723	46.3551	38.4281	518.087	846.583	1077.13	27.372	48.0394	160.188	32.0889	32.6012	85.9101	GST1	GSTT1_MANSE	Glutathione S-transferase 1 OS=Manduca sexta GN=GST1 PE=2 SV=1	tr|A0A0L0C9Y8|A0A0L0C9Y8_LUCCU	Uncharacterized protein OS=Lucilia cuprina GN=FF38_02363 PE=3 SV=1	IPR004046:Glutathione S-transferase, C-terminal	GO:0005515	protein binding	path:ko00480,path:ko00980,path:ko00982,path:ko00983,path:ko01524,path:ko05200,path:ko05204,path:ko05225,path:ko05418	Glutathione metabolism|Metabolism of xenobiotics by cytochrome P450|Drug metabolism - cytochrome P450|Drug metabolism - other enzymes|Platinum drug resistance|Pathways in cancer|Chemical carcinogenesis|Hepatocellular carcinoma|Fluid shear stress and atherosclerosis
evm.model.Contig31.213	0.553755	0.453141	0.0843167	1.46516	3.62402	1.75704	102.758	64.3326	98.014	127.677	25.4203	94.4601	46.1123	84.2893	85.8721	Eci2	ECI2_RAT	Enoyl-CoA delta isomerase 2, mitochondrial OS=Rattus norvegicus GN=Eci2 PE=1 SV=1	tr|A0A0L0C7D9|A0A0L0C7D9_LUCCU	Uncharacterized protein OS=Lucilia cuprina GN=FF38_00399 PE=4 SV=1	IPR001753:Crotonase superfamily	GO:0003824	catalytic activity	path:ko00071,path:ko04146	Fatty acid degradation|Peroxisome
evm.model.Contig45.220	17.7551	18.5125	16.2116	384.792	312.007	237.177	325.637	264.498	318.92	844.94	931.894	663.049	88.6986	93.361	85.5519	BDH1	BDH_HUMAN	D-beta-hydroxybutyrate dehydrogenase, mitochondrial OS=Homo sapiens GN=BDH1 PE=1 SV=3	tr|A0A0L0C680|A0A0L0C680_LUCCU	Uncharacterized protein OS=Lucilia cuprina GN=FF38_06954 PE=4 SV=1	IPR002347:Short-chain dehydrogenase/reductase SDR
evm.model.Contig14.135	36.5314	15.323	27.0755	65.3981	63.4649	44.9275	54.7988	47.0045	46.7901	346.609	198.895	344.525	86.1071	156.228	85.5089	Gclc	DIPD_PROTE	Diptericin-D OS=Protophormia terraenovae PE=1 SV=1	tr|A0A1I8PF92|A0A1I8PF92_STOCA	Uncharacterized protein OS=Stomoxys calcitrans GN=106086283 PE=4 SV=1	IPR009382:Coleoptericin	GO:0005576	extracellular region
evm.model.Contig2.228	105.275	79.1259	88.4778	48.7782	46.067	31.4104	44.5317	52.2625	43.0241	53.2936	35.2601	51.842	106.431	101.983	85.4078				tr|A0A0L0BYB6|A0A0L0BYB6_LUCCU	Uncharacterized protein OS=Lucilia cuprina GN=FF38_12385 PE=4 SV=1
evm.model.Contig76.47	4.26064	4.43555	4.90451	4.79338	4.39761	2.93197	8.69033	10.1603	8.50559	45.3609	18.0701	39.8472	89.7889	87.6403	85.1275	CG7611	WDR26_DROME	WD repeat-containing protein 26 homolog OS=Drosophila melanogaster GN=CG7611 PE=1 SV=1	tr|A0A0L0C8M9|A0A0L0C8M9_LUCCU	Putative WD repeat-containing protein 26 OS=Lucilia cuprina GN=FF38_05755 PE=4 SV=1	IPR020472:G-protein beta WD-40 repeat	GO:0005515	protein binding
evm.model.Contig92.8	30.7144	51.9042	47.7391	14.326	10.4533	10.129	11.3215	8.23237	14.1096	44.8847	29.8094	28.3494	93.2981	116.131	84.8864	scyl	SCLLA_DROME	Protein scylla OS=Drosophila melanogaster GN=scyl PE=2 SV=1	tr|A0A0L0C7I0|A0A0L0C7I0_LUCCU	Protein scylla (Fragment) OS=Lucilia cuprina GN=FF38_05776 PE=4 SV=1	IPR012918:RTP801-like	GO:0005737	cytoplasm
evm.model.Contig17.168	22.0511	26.6095	21.1998	88.5232	82.295	69.9533	45.5043	45.6118	46.8058	44.5209	58.8261	36.6837	95.288	97.0581	84.3417	ASPH	ASPH_HUMAN	Aspartyl/asparaginyl beta-hydroxylase OS=Homo sapiens GN=ASPH PE=1 SV=3	tr|A0A0L0BMF6|A0A0L0BMF6_LUCCU	Uncharacterized protein OS=Lucilia cuprina GN=FF38_14081 PE=4 SV=1	IPR007803:Aspartyl/asparaginy/proline hydroxylase	GO:0018193	peptidyl-amino acid modification
evm.model.Contig107.51	3.27798	3.17137	3.68973	10.2992	5.22188	9.93433	5.63649	8.2454	6.43263	12.2108	11.139	11.0575	81.354	80.6529	84.0424	CG6966	FEM1A_DROME	Protein fem-1 homolog CG6966 OS=Drosophila melanogaster GN=CG6966 PE=2 SV=2	tr|A0A0L0C3A3|A0A0L0C3A3_LUCCU	Pfem-1-like protein OS=Lucilia cuprina GN=FF38_13011 PE=4 SV=1	IPR002110:Ankyrin repeat	GO:0005515	protein binding
evm.model.Contig7.287	8.11874	7.84925	8.93173	6.24401	6.05975	4.59131	11.2242	13.0649	11.3244	46.5134	18.4299	44.2907	83.0239	72.3665	84.0303	STAM	STAM1_HUMAN	Signal transducing adapter molecule 1 OS=Homo sapiens GN=STAM PE=1 SV=3	tr|A0A0L0CFQ5|A0A0L0CFQ5_LUCCU	Uncharacterized protein OS=Lucilia cuprina GN=FF38_14423 PE=4 SV=1	IPR001452:SH3 domain	GO:0006886	intracellular protein transport	path:ko04144,path:ko04630	Endocytosis|Jak-STAT signaling pathway
evm.model.Contig5.341	21.6533	18.9587	24.1754	23.6676	25.2641	22.966	63.7238	62.6115	69.7912	173.355	89.6673	179.536	70.8719	68.6763	83.9534	FAAH2	FAAH2_HUMAN	Fatty-acid amide hydrolase 2 OS=Homo sapiens GN=FAAH2 PE=2 SV=1	tr|A0A0L0BX96|A0A0L0BX96_LUCCU	Uncharacterized protein OS=Lucilia cuprina GN=FF38_13571 PE=4 SV=1	IPR023631:Amidase signature domain
evm.model.Contig84.53	0.670317	0.219654	0	0.855767	1.70634	0.861388	6.04693	30.6715	140.012	15.8881	83.7053	77.4026	194.055	33.9152	83.8973	Sema-1a	ARY2_CALVI	Arylphorin subunit C223 OS=Calliphora vicina PE=2 SV=1	tr|A0A0A1WS33|A0A0A1WS33_BACCU	Larval serum protein 1 beta chain (Fragment) OS=Bactrocera cucurbitae GN=Lsp1beta_2 PE=4 SV=1	IPR013788:Hemocyanin/hexamerin
evm.model.Contig6.35	45.0312	42.4181	37.0328	9.08528	24.2231	8.26444	39.4687	33.2902	25.5949	91.3125	13.455	107.259	54.5297	54.6728	83.8859	Mdr49	MDR49_DROME	Multidrug resistance protein homolog 49 OS=Drosophila melanogaster GN=Mdr49 PE=2 SV=2	tr|A0A0L0C7Z8|A0A0L0C7Z8_LUCCU	Putative multidrug resistance protein 49 OS=Lucilia cuprina GN=FF38_13163 PE=4 SV=1	IPR003439:ABC transporter-like	GO:0005524	ATP binding	path:ko02010,path:ko04976,path:ko05206,path:ko05226	ABC transporters|Bile secretion|MicroRNAs in cancer|Gastric cancer
evm.model.Contig71.8	0	0	0	0	0	0	0.126514	0	0	0.0595925	0	0	10.4854	67.2282	83.8684	loxl2a	LOL2A_DANRE	Lysyl oxidase homolog 2A OS=Danio rerio GN=loxl2a PE=2 SV=1	tr|A0A0L0CRC7|A0A0L0CRC7_LUCCU	Uncharacterized protein OS=Lucilia cuprina GN=FF38_11067 PE=4 SV=1	IPR017448:SRCR-like domain	GO:0005507	copper ion binding
evm.model.Contig7.99	86.0861	85.6592	66.559	223.321	219.404	141.741	231.933	199.578	194.269	684.25	597.448	628.867	68.1165	76.0326	83.7838				tr|A0A0L0CG73|A0A0L0CG73_LUCCU	Uncharacterized protein OS=Lucilia cuprina GN=FF38_14348 PE=4 SV=1
evm.model.Contig37.168	9.53936	11.3705	13.7284	14.9263	11.1763	9.87538	27.8035	17.4523	23.0899	93.9135	50.4149	94.7602	78.5963	85.3517	83.5288	Ube2h	UBE2H_MOUSE	Ubiquitin-conjugating enzyme E2 H OS=Mus musculus GN=Ube2h PE=1 SV=1	tr|A0A0L0CAF0|A0A0L0CAF0_LUCCU	Uncharacterized protein OS=Lucilia cuprina GN=FF38_02122 PE=3 SV=1	IPR000608:Ubiquitin-conjugating enzyme E2			path:ko04120	Ubiquitin mediated proteolysis
evm.model.Contig51.59	3.79618	2.37201	2.12101	3.645	3.65781	6.60145	23.5736	17.6301	22.6935	193.881	182.466	231.665	75.1971	93.3695	83.5285	2021-03-01	MARC1_DANRE	Mitochondrial amidoxime-reducing component 1 OS=Danio rerio GN=marc1 PE=2 SV=1	tr|A0A1I8M4Y9|A0A1I8M4Y9_MUSDO	Uncharacterized protein OS=Musca domestica GN=101891537 PE=4 SV=1	IPR005302:Molybdenum cofactor sulfurase, C-terminal	GO:0003824	catalytic activity
evm.model.Contig26.402	67.7382	63.6713	59.5057	41.677	47.859	100.386	179.324	169.003	178.533	146.761	134.221	83.104	57.2218	80.9019	83.5	Gfpt2	GFPT2_MOUSE	Glutamine--fructose-6-phosphate aminotransferase [isomerizing] 2 OS=Mus musculus GN=Gfpt2 PE=1 SV=3	tr|A0A0L0C3B7|A0A0L0C3B7_LUCCU	Uncharacterized protein (Fragment) OS=Lucilia cuprina GN=FF38_10334 PE=4 SV=1	IPR001347:Sugar isomerase (SIS)	GO:0097367	carbohydrate derivative binding	path:ko00250,path:ko00520,path:ko04931	Alanine, aspartate and glutamate metabolism|Amino sugar and nucleotide sugar metabolism|Insulin resistance
evm.model.Contig104.38	66.6205	68.6127	71.4403	27.0405	30.4224	32.0675	47.6793	82.1556	80.6648	44.9333	35.2127	38.1116	82.5547	80.9983	83.4876	sec23a	SC23A_DANRE	Protein transport protein Sec23A OS=Danio rerio GN=sec23a PE=2 SV=1	tr|A0A0L0BYD7|A0A0L0BYD7_LUCCU	Uncharacterized protein OS=Lucilia cuprina GN=FF38_11805 PE=4 SV=1	IPR012990:Sec23/Sec24 beta-sandwich	GO:0006886	intracellular protein transport	path:ko04141	Protein processing in endoplasmic reticulum
evm.model.Contig9.64	9.10079	10.5151	13.2569	4.82934	5.62957	3.23402	2.66134	4.0597	3.20972	1.69685	1.88	0.889622	94.2427	66.4464	83.1281	ADAMTS9	ATS9_HUMAN	A disintegrin and metalloproteinase with thrombospondin motifs 9 OS=Homo sapiens GN=ADAMTS9 PE=1 SV=4	tr|A0A1I8QB13|A0A1I8QB13_STOCA	Uncharacterized protein OS=Stomoxys calcitrans GN=106081477 PE=4 SV=1	IPR012314:Peptidase M12B, GON-ADAMTSs	GO:0004222	metalloendopeptidase activity
evm.model.Contig17.344	16.0551	13.9754	13.9252	2.14334	4.38597	2.34761	105.91	141.535	161.454	74.7201	37.4034	74.5351	61.8908	81.6778	83.0425	Ance	ACE_DROME	Angiotensin-converting enzyme OS=Drosophila melanogaster GN=Ance PE=1 SV=3	tr|A0A0L0C587|A0A0L0C587_LUCCU	Phenoloxidase subunit A3 OS=Lucilia cuprina GN=FF38_10017 PE=4 SV=1	IPR001548:Peptidase M2, peptidyl-dipeptidase A	GO:0006508	proteolysis	path:ko04614,path:ko04924,path:ko05142,path:ko05410	Renin-angiotensin system|Renin secretion|Chagas disease (American trypanosomiasis)|Hypertrophic cardiomyopathy (HCM)
evm.model.Contig35.102	42.6037	40.2535	43.9383	22.4395	18.4625	16.1236	31.0541	26.0291	28.9527	134.938	58.7029	141.234	78.5971	73.8188	82.9502	ITM2A	ITM2A_HUMAN	Integral membrane protein 2A OS=Homo sapiens GN=ITM2A PE=1 SV=2	tr|A0A0L0C8X3|A0A0L0C8X3_LUCCU	Uncharacterized protein (Fragment) OS=Lucilia cuprina GN=FF38_09413 PE=4 SV=1	IPR007084:BRICHOS domain
evm.model.Contig16.377	40.1997	42.9625	39.6965	36.7121	39.5419	29.678	92.1542	78.9609	77.5601	185.993	140.778	161.702	87.4788	97.4561	82.9177	uxs1	UXS1_XENTR	UDP-glucuronic acid decarboxylase 1 OS=Xenopus tropicalis GN=uxs1 PE=2 SV=1	tr|A0A0L0BS88|A0A0L0BS88_LUCCU	Uncharacterized protein OS=Lucilia cuprina GN=FF38_02879 PE=4 SV=1	IPR016040:NAD(P)-binding domain			path:ko00520	Amino sugar and nucleotide sugar metabolism
evm.model.Contig34.88	17.2088	6.26617	15.1777	2.17558	3.37188	1.02953	57.8569	135.562	96.2366	111.2	60.0971	207.545	84.0829	118.07	82.8372	Mal-A3	MAL3_DROME	Maltase A3 OS=Drosophila melanogaster GN=Mal-A3 PE=2 SV=2	tr|A0A0L0CMV9|A0A0L0CMV9_LUCCU	Maltase A3 OS=Lucilia cuprina GN=FF38_08743 PE=4 SV=1	IPR006047:Glycosyl hydrolase, family 13, catalytic domain	GO:0003824	catalytic activity
evm.model.Contig186.27	62.9068	54.2757	61.7022	39.9107	39.6016	31.8235	62.32	52.3679	49.1009	136.567	82.2597	133.864	81.6575	80.494	82.8156	RAB2A	RAB2A_CHICK	Ras-related protein Rab-2A OS=Gallus gallus GN=RAB2A PE=2 SV=1	tr|A0A0L0C2Y3|A0A0L0C2Y3_LUCCU	Uncharacterized protein OS=Lucilia cuprina GN=FF38_09997 PE=4 SV=1	IPR001806:Small GTPase superfamily	GO:0003924	GTPase activity	path:ko04152	AMPK signaling pathway
evm.model.Contig121.12	3.11174	3.37828	2.91109	0.791751	1.5536	0.538221	1.94878	1.62098	0.950184	18.949	6.05209	10.6309	55.5599	65.9324	82.8141				tr|A0A0L0BRR0|A0A0L0BRR0_LUCCU	Uncharacterized protein OS=Lucilia cuprina GN=FF38_04097 PE=4 SV=1
evm.model.Contig6.895	1.20111	0.143773	0.471688	0.183401	0.363613	0.550519	1.92468	2.09647	1.00266	111.423	70.8774	154.112	88.4052	86.9483	82.6886				tr|A0A0L0CF35|A0A0L0CF35_LUCCU	Uncharacterized protein (Fragment) OS=Lucilia cuprina GN=FF38_01600 PE=4 SV=1
evm.model.Contig116.39	12.6898	14.6665	14.7314	13.2264	12.6107	9.75516	6.63815	9.0911	7.2965	43.103	25.6305	27.202	72.8187	87.0836	82.5886	PPP4R2r	PP4R2_DROME	Serine/threonine-protein phosphatase 4 regulatory subunit 2 OS=Drosophila melanogaster GN=PPP4R2r PE=1 SV=2	tr|T1PG58|T1PG58_MUSDO	PPP4R2 protein OS=Musca domestica PE=2 SV=1	IPR015267:Protein phosphatase 4 core regulatory subunit R2	GO:0019888	protein phosphatase regulator activity
evm.model.Contig57.150	127.805	102.115	134.619	50.5918	35.993	48.1956	27.914	73.3294	43.1409	93.1309	43.8402	70.7187	93.0468	91.9266	82.575	Picot	PICO_DROME	Putative inorganic phosphate cotransporter OS=Drosophila melanogaster GN=Picot PE=1 SV=1	tr|A0A0L0CIG3|A0A0L0CIG3_LUCCU	Putative inorganic phosphate cotransporter OS=Lucilia cuprina GN=FF38_11297 PE=4 SV=1	IPR020846:Major facilitator superfamily domain	GO:0016021	integral component of membrane
evm.model.Contig26.411	146.048	149.297	169.677	99.8817	105.326	93.6275	64.0607	88.4196	76.1007	63.7838	48.7337	62.8282	78.349	80.6181	82.5596	CkIIalpha	CSK2A_DROME	Casein kinase II subunit alpha OS=Drosophila melanogaster GN=CkIIalpha PE=1 SV=2	tr|T1P9R9|T1P9R9_MUSDO	Protein kinase OS=Musca domestica GN=101896040 PE=2 SV=1	IPR000719:Protein kinase domain	GO:0004672	protein kinase activity	path:ko03008,path:ko04064,path:ko04137,path:ko04139,path:ko04310,path:ko04520,path:ko04712,path:ko05162,path:ko05168,path:ko05169	Ribosome biogenesis in eukaryotes|NF-kappa B signaling pathway|Mitophagy - animal|Mitophagy - yeast|Wnt signaling pathway|Adherens junction|Circadian rhythm - plant|Measles|Herpes simplex infection|Epstein-Barr virus infection
evm.model.Contig14.217	51.9743	47.108	51.2715	33.8486	41.3957	31.8482	47.9561	51.6612	46.9837	94.8637	55.8251	77.1749	88.831	84.4352	82.4649	Cdc42	CDC42_DROPS	Cdc42 homolog OS=Drosophila pseudoobscura pseudoobscura GN=Cdc42 PE=3 SV=1	tr|A0A1W4VTT8|A0A1W4VTT8_DROFC	cdc42 homolog OS=Drosophila ficusphila GN=LOC108097637 PE=3 SV=1	IPR003578:Small GTPase superfamily, Rho type	GO:0005525	GTP binding	path:ko04010,path:ko04011,path:ko04014,path:ko04015,path:ko04062,path:ko04144,path:ko04360,path:ko04370,path:ko04510,path:ko04520,path:ko04530,path:ko04660,path:ko04666,path:ko04670,path:ko04722,path:ko04810,path:ko04912,path:ko04932,path:ko04933,path:ko05100,path:ko05120,path:ko05130,path:ko05131,path:ko05132,path:ko05165,path:ko05200,path:ko05203,path:ko05205,path:ko05211,path:ko05212	MAPK signaling pathway|MAPK signaling pathway - yeast|Ras signaling pathway|Rap1 signaling pathway|Chemokine signaling pathway|Endocytosis|Axon guidance|VEGF signaling pathway|Focal adhesion|Adherens junction|Tight junction|T cell receptor signaling pathway|Fc gamma R-mediated phagocytosis|Leukocyte transendothelial migration|Neurotrophin signaling pathway|Regulation of actin cytoskeleton|GnRH si…
evm.model.Contig34.191	8.55127	7.06699	6.57173	41.2363	29.3571	21.8201	98.4523	63.1052	97.6194	156.331	97.0005	149.049	69.1425	79.0461	82.4556	GSTT1	GSTT1_BOVIN	Glutathione S-transferase theta-1 OS=Bos taurus GN=GSTT1 PE=2 SV=3	tr|A0A0L0BNH3|A0A0L0BNH3_LUCCU	Uncharacterized protein OS=Lucilia cuprina GN=FF38_09808 PE=3 SV=1	IPR004046:Glutathione S-transferase, C-terminal	GO:0005515	protein binding	path:ko00480,path:ko00980,path:ko00982,path:ko00983,path:ko01524,path:ko05200,path:ko05204,path:ko05225,path:ko05418	Glutathione metabolism|Metabolism of xenobiotics by cytochrome P450|Drug metabolism - cytochrome P450|Drug metabolism - other enzymes|Platinum drug resistance|Pathways in cancer|Chemical carcinogenesis|Hepatocellular carcinoma|Fluid shear stress and atherosclerosis
evm.model.Contig80.27	22.5146	20.1289	19.4911	23.0164	22.7978	24.8182	24.0706	22.056	22.8104	60.6829	51.1424	56.2921	91.9569	81.2363	82.4068	CG5902	Y5902_DROME	Uncharacterized protein CG5902 OS=Drosophila melanogaster GN=CG5902 PE=2 SV=1	tr|A0A1I8M7T2|A0A1I8M7T2_MUSDO	Uncharacterized protein OS=Musca domestica GN=101894353 PE=4 SV=1	IPR002733:AMMECR1 domain
evm.model.Contig3.837	92.6649	59.5555	84.1544	34.8485	37.962	37.1254	80.474	147.236	132.219	77.0773	57.9206	79.5119	87.8378	101.718	82.3387	LTA4H	LKHA4_HUMAN	Leukotriene A-4 hydrolase OS=Homo sapiens GN=LTA4H PE=1 SV=2	tr|A0A1I8MPT3|A0A1I8MPT3_MUSDO	Leukotriene A(4) hydrolase OS=Musca domestica GN=101894296 PE=3 SV=1	IPR015211:Peptidase M1, leukotriene A4 hydrolase/aminopeptidase C-terminal	GO:0008237	metallopeptidase activity	path:ko00590	Arachidonic acid metabolism
evm.model.Contig43.126	2192.31	2558.6	2099.37	5715.99	5296.12	3946.54	5149.19	3679.67	4094.55	2467.97	5665	1838.62	149.387	173.685	82.309	Mlc1	MLC1_DROSI	Myosin light chain alkali OS=Drosophila simulans GN=Mlc1 PE=3 SV=3	tr|D3TR65|D3TR65_GLOMM	Myosin alkali light chain 1 OS=Glossina morsitans morsitans PE=2 SV=1	IPR002048:EF-hand domain	GO:0005509	calcium ion binding
evm.model.Contig18.129	0.742392	0	0.663635	0	0	0	0	0	0	0	0.722802	0.756112	45.4499	780.916	82.2882	mig-6	VKT39_HAPSC	U15-theraphotoxin-Hs1a OS=Haplopelma schmidti PE=2 SV=1	tr|A0A0L0BRU8|A0A0L0BRU8_LUCCU	Uncharacterized protein OS=Lucilia cuprina GN=FF38_12133 PE=4 SV=1	IPR002223:Pancreatic trypsin inhibitor Kunitz domain	GO:0004867	serine-type endopeptidase inhibitor activity
evm.model.Contig14.122	80.9478	63.1728	62.8605	47.1337	57.6277	42.2015	36.1287	35.9138	37.032	78.5372	50.2451	70.8928	81.9842	75.7141	82.2544	MED10	MED10_DROME	Mediator of RNA polymerase II transcription subunit 10 OS=Drosophila melanogaster GN=MED10 PE=1 SV=1	tr|A0A0L0C7L2|A0A0L0C7L2_LUCCU	Mediator of RNA polymerase II transcription subunit 10 OS=Lucilia cuprina GN=FF38_06543 PE=4 SV=1	IPR019145:Mediator complex, subunit Med10	GO:0001104	RNA polymerase II transcription cofactor activity
evm.model.Contig24.223	14.1583	13.2973	12.8225	7.34213	7.64489	6.07601	34.9857	26.8711	35.5945	131.123	63.0879	136.247	77.211	66.8077	82.251	F56F10.1	YM9I_CAEEL	Putative serine protease F56F10.1 OS=Caenorhabditis elegans GN=F56F10.1 PE=1 SV=2	tr|A0A0L0CRF0|A0A0L0CRF0_LUCCU	Uncharacterized protein OS=Lucilia cuprina GN=FF38_10872 PE=4 SV=1	IPR008758:Peptidase S28	GO:0006508	proteolysis
evm.model.Contig148.14	8.44587	9.12478	9.74733	9.69069	9.98285	8.98896	16.5266	16.2828	13.844	61.0928	25.8577	56.5786	87.5732	79.5852	82.2489	RanBPM	RBP9X_DROME	Ran-binding proteins 9/10 homolog OS=Drosophila melanogaster GN=RanBPM PE=1 SV=1	tr|A0A0L0BRF3|A0A0L0BRF3_LUCCU	Putative Ran-binding proteins 9/10 OS=Lucilia cuprina GN=FF38_03213 PE=4 SV=1	IPR024964:CTLH/CRA C-terminal to LisH motif domain	GO:0005515	protein binding
evm.model.Contig8.319	0.301112	0.276711	0.853055	0.298642	0.49501	0.134041	4.50741	4.15343	5.60914	109.675	34.6295	145.277	85.4591	121.09	82.2237				tr|A0A1I8PQA4|A0A1I8PQA4_STOCA	Uncharacterized protein OS=Stomoxys calcitrans GN=106083942 PE=4 SV=1	IPR015470:Caspase-3	GO:0004197	cysteine-type endopeptidase activity
evm.model.Contig28.121	0.159541	0.0668599	0.147639	0.0823106	0.490207	0	0.318237	0.0790567	0.301662	34.6916	10.1171	23.4451	105.58	116.033	81.9377	wun	WUN_DROME	Putative phosphatidate phosphatase OS=Drosophila melanogaster GN=wun PE=1 SV=2	tr|A0A0L0CRW7|A0A0L0CRW7_LUCCU	Putative phosphatidate phosphatase OS=Lucilia cuprina GN=FF38_12299 PE=4 SV=1	IPR000326:Phosphatidic acid phosphatase type 2/haloperoxidase			path:ko00561,path:ko00564,path:ko00565,path:ko00600,path:ko04072,path:ko04666,path:ko04975,path:ko05231	Glycerolipid metabolism|Glycerophospholipid metabolism|Ether lipid metabolism|Sphingolipid metabolism|Phospholipase D signaling pathway|Fc gamma R-mediated phagocytosis|Fat digestion and absorption|Choline metabolism in cancer
evm.model.Contig34.29	25.375	23.8797	21.8498	18.2769	11.7653	24.8206	29.0327	39.7835	36.2822	56.6192	76.8249	66.0991	67.7802	69.231	81.821	Pu	GCH1_DROME	GTP cyclohydrolase 1 OS=Drosophila melanogaster GN=Pu PE=2 SV=3	tr|A0A0L0BUZ2|A0A0L0BUZ2_LUCCU	GTP cyclohydrolase 1 OS=Lucilia cuprina GN=FF38_12161 PE=3 SV=1	IPR020602:GTP cyclohydrolase I domain	GO:0003934	GTP cyclohydrolase I activity	path:ko00790	Folate biosynthesis
evm.model.Contig14.339	295.562	253.69	244.666	341.443	345.111	308.087	372.334	317.068	341.836	141.822	245.244	108.647	75.4258	75.7749	81.7277	NDUFB8	NDUB8_BOVIN	NADH dehydrogenase [ubiquinone] 1 beta subcomplex subunit 8, mitochondrial OS=Bos taurus GN=NDUFB8 PE=1 SV=1	tr|A0A0L0CCS1|A0A0L0CCS1_LUCCU	Uncharacterized protein OS=Lucilia cuprina GN=FF38_03048 PE=4 SV=1	IPR008699:NADH dehydrogenase [ubiquinone] 1 beta subcomplex subunit 8	GO:0003954	NADH dehydrogenase activity	path:ko00190,path:ko04714,path:ko04723,path:ko04932,path:ko05010,path:ko05012,path:ko05016	Oxidative phosphorylation|Thermogenesis|Retrograde endocannabinoid signaling|Non-alcoholic fatty liver disease (NAFLD)|Alzheimer's disease|Parkinson's disease|Huntington's disease
evm.model.Contig8.518	105.228	100.964	113.56	45.2828	52.0049	48.5551	53.0863	62.7362	55.0256	82.0322	54.7165	84.2168	79.395	82.9646	81.7097	eIF-3p66	EI3D1_DROMO	Eukaryotic translation initiation factor 3 subunit D-1 OS=Drosophila mojavensis GN=eIF-3p66 PE=3 SV=1	tr|A0A1A9YT44|A0A1A9YT44_GLOFF	Eukaryotic translation initiation factor 3 subunit D OS=Glossina fuscipes fuscipes PE=3 SV=1	IPR007783:Eukaryotic translation initiation factor 3 subunit D	GO:0004252	serine-type endopeptidase activity	path:ko03013	RNA transport
evm.model.Contig61.37	874.394	1063.02	963.564	1483.63	1504.22	1175.65	1442.06	1393.6	1313.91	616.678	1395.96	450.625	87.9836	90.3816	81.5914	Ca-P60A	ATC1_DROME	Calcium-transporting ATPase sarcoplasmic/endoplasmic reticulum type OS=Drosophila melanogaster GN=Ca-P60A PE=1 SV=2	tr|A0A0L0CN78|A0A0L0CN78_LUCCU	Calcium-transporting ATPase OS=Lucilia cuprina GN=FF38_10054 PE=3 SV=1	IPR023214:HAD-like domain	GO:0005388	calcium-transporting ATPase activity	path:ko04020,path:ko04022,path:ko04972,path:ko05010	Calcium signaling pathway|cGMP-PKG signaling pathway|Pancreatic secretion|Alzheimer's disease
evm.model.Contig28.78	705.038	631.988	641.712	369.396	552.86	475.503	212.824	468.426	387.599	62.4898	66.0182	63.6613	74.4453	91.3805	81.4664	SJCHGC01960	CH10_SCHJA	10 kDa heat shock protein, mitochondrial OS=Schistosoma japonicum GN=SJCHGC01960 PE=3 SV=2	tr|A0A0L0C3S1|A0A0L0C3S1_LUCCU	Uncharacterized protein OS=Lucilia cuprina GN=FF38_10857 PE=3 SV=1	IPR020818:GroES chaperonin family	GO:0005737	cytoplasm
evm.model.Contig74.113	6.97269	7.39268	7.62229	8.05372	10.2975	9.8789	10.5885	10.1678	12.811	51.3953	24.3867	50.3021	113.555	99.1545	81.4296	CG17065	NAGA_DROME	Putative N-acetylglucosamine-6-phosphate deacetylase OS=Drosophila melanogaster GN=CG17065 PE=2 SV=1	tr|A0A0L0C510|A0A0L0C510_LUCCU	N-acetylglucosamine-6-phosphate deacetylase OS=Lucilia cuprina GN=FF38_01089 PE=3 SV=1	IPR003764:N-acetylglucosamine-6-phosphate deacetylase	GO:0006044	N-acetylglucosamine metabolic process	path:ko00520	Amino sugar and nucleotide sugar metabolism
evm.model.Contig37.24	3.74993	7.56983	6.21598	41.0208	25.9995	46.1641	17.9734	17.3299	14.7316	19.6554	22.85	10.5313	68.4088	63.773	81.3183				tr|A0A1I8MUL1|A0A1I8MUL1_MUSDO	Uncharacterized protein OS=Musca domestica GN=101891129 PE=4 SV=1	IPR004302:Cellulose/chitin-binding protein, N-terminal
evm.model.Contig8.487	8.38627	5.96581	5.92766	3.04715	4.11693	3.16404	34.8456	26.1329	32.5804	142.513	73.0663	160.834	82.152	88.6166	81.2055	ea	EAST_DROME	Serine protease easter OS=Drosophila melanogaster GN=ea PE=1 SV=3	tr|A0A1I8PEC5|A0A1I8PEC5_STOCA	Uncharacterized protein OS=Stomoxys calcitrans GN=106084042 PE=3 SV=1	IPR001254:Serine proteases, trypsin domain	GO:0004252	serine-type endopeptidase activity
evm.model.Contig154.21	138.535	115.363	124.545	46.4118	64.5161	52.3185	48.1488	67.441	57.2378	53.9208	39.0899	36.1799	83.1774	65.8053	81.041				tr|A0A0K8W6E3|A0A0K8W6E3_BACLA	Protein translation factor SUI1 OS=Bactrocera latifrons GN=CG17737 PE=4 SV=1	IPR001950:SUI1 domain	GO:0003743	translation initiation factor activity	path:ko03013	RNA transport
evm.model.Contig94.34	68.4592	71.2617	75.2656	29.2734	19.1966	24.2799	39.395	24.9131	31.9403	89.6637	42.0973	59.4241	67.0294	81.1017	80.9805				tr|A0A0L0C7D2|A0A0L0C7D2_LUCCU	Uncharacterized protein (Fragment) OS=Lucilia cuprina GN=FF38_04362 PE=4 SV=1	IPR026780:Proline-rich nuclear receptor coactivator 1/2
evm.model.Contig135.31	66.3588	65.5906	64.8199	68.8263	77.5505	55.0202	78.6899	72.7701	78.6914	145.855	129.127	129.272	106.3	87.7794	80.7872	Parva	PARVA_MOUSE	Alpha-parvin OS=Mus musculus GN=Parva PE=1 SV=1	tr|A0A0L0BNF5|A0A0L0BNF5_LUCCU	Uncharacterized protein OS=Lucilia cuprina GN=FF38_00098 PE=4 SV=1	IPR001715:Calponin homology domain	GO:0005515	protein binding	path:ko04510	Focal adhesion
evm.model.Contig6.630	31.9014	25.5747	28.6618	1.15985	4.40002	2.86424	2.88982	2.62314	1.7029	72.126	26.1598	109.349	31.0403	39.1095	80.7447	Odc1	DCOR1_DROME	Ornithine decarboxylase 1 OS=Drosophila melanogaster GN=Odc1 PE=2 SV=3	tr|A0A0L0CR92|A0A0L0CR92_LUCCU	Ornithine decarboxylase 1 OS=Lucilia cuprina GN=FF38_10960 PE=3 SV=1	IPR000183:Ornithine/DAP/Arg decarboxylase	GO:0003824	catalytic activity	path:ko00330,path:ko00480	Arginine and proline metabolism|Glutathione metabolism
evm.model.Contig46.89	63.5337	65.4042	65.2685	49.876	37.4001	54.2104	31.7353	27.5645	23.3255	94.4559	64.2997	77.9434	48.1461	70.8869	80.6759	Hex-t2	HXK2_DROME	Hexokinase type 2 OS=Drosophila melanogaster GN=Hex-t2 PE=2 SV=4	tr|A0A0L0C2Q6|A0A0L0C2Q6_LUCCU	Phosphotransferase OS=Lucilia cuprina GN=FF38_08630 PE=3 SV=1	IPR022673:Hexokinase, C-terminal	GO:0005524	ATP binding	path:ko00010,path:ko00051,path:ko00052,path:ko00500,path:ko00520,path:ko00521,path:ko00524,path:ko04066,path:ko04910,path:ko04930,path:ko04973,path:ko05230	Glycolysis / Gluconeogenesis|Fructose and mannose metabolism|Galactose metabolism|Starch and sucrose metabolism|Amino sugar and nucleotide sugar metabolism|Streptomycin biosynthesis|Neomycin, kanamycin and gentamicin biosynthesis|HIF-1 signaling pathway|Insulin signaling pathway|Type II diabetes mellitus|Carbohydrate digestion and absorption|Central carbon metabolism in cancer
evm.model.Contig24.37	25.1063	18.9845	20.4979	29.1253	31.3121	26.0055	31.4128	23.5894	25.5821	83.1871	51.4975	86.4582	77.8295	77.3482	80.5625	TMEM50B	TM50B_PONAB	Transmembrane protein 50B OS=Pongo abelii GN=TMEM50B PE=2 SV=1	tr|A0A0L0CL14|A0A0L0CL14_LUCCU	Uncharacterized protein OS=Lucilia cuprina GN=FF38_07150 PE=4 SV=1	IPR007919:Uncharacterised protein family UPF0220
evm.model.Contig5.256	83.8538	70.005	70.0374	41.7451	48.5271	41.2906	46.0231	44.0312	47.3294	96.0102	46.5691	93.8347	75.8628	80.9013	80.5206	Iscu	ISCU_MOUSE	Iron-sulfur cluster assembly enzyme ISCU, mitochondrial OS=Mus musculus GN=Iscu PE=1 SV=1	tr|A0A0L0BZX4|A0A0L0BZX4_LUCCU	Uncharacterized protein OS=Lucilia cuprina GN=FF38_12964 PE=3 SV=1	IPR002871:NIF system FeS cluster assembly, NifU, N-terminal	GO:0005506	iron ion binding
evm.model.Contig5.73	53.3045	46.3328	48.5122	135.18	132.908	160.102	164.488	155.677	158.141	207.101	247.233	212.069	83.5547	99.6301	80.4179	Sb	STUB_DROME	Serine proteinase stubble OS=Drosophila melanogaster GN=Sb PE=2 SV=2	tr|A0A1I8PTN5|A0A1I8PTN5_STOCA	Uncharacterized protein OS=Stomoxys calcitrans GN=106081797 PE=4 SV=1	IPR001254:Serine proteases, trypsin domain	GO:0004252	serine-type endopeptidase activity
evm.model.Contig6.861	7.04806	8.31918	9.48936	34.4801	19.5776	42.0759	8.3784	7.05311	6.44976	7.47752	6.24796	4.06576	118.768	75.781	80.3516	CG8399	FRRS1_DROME	Putative ferric-chelate reductase 1 homolog OS=Drosophila melanogaster GN=CG8399 PE=2 SV=1	tr|A0A0L0CBB6|A0A0L0CBB6_LUCCU	Putative ferric-chelate reductase 1 OS=Lucilia cuprina GN=FF38_11516 PE=4 SV=1	IPR006593:Cytochrome b561/ferric reductase transmembrane
evm.model.Contig44.172	81.8847	59.3767	66.3288	129.018	107.376	88.9661	408.808	155.472	242.604	209.308	124.504	165.713	79.3465	63.8549	80.0788	Acadvl	ACADV_RAT	Very long-chain specific acyl-CoA dehydrogenase, mitochondrial OS=Rattus norvegicus GN=Acadvl PE=1 SV=1	tr|A0A0L0CK58|A0A0L0CK58_LUCCU	Uncharacterized protein (Fragment) OS=Lucilia cuprina GN=FF38_13110 PE=3 SV=1	IPR009075:Acyl-CoA dehydrogenase/oxidase C-terminal	GO:0016627	oxidoreductase activity, acting on the CH-CH group of donors	path:ko00071	Fatty acid degradation
evm.model.Contig1.122	125.299	99.0762	103.919	79.7074	84.0256	75.1084	67.5552	88.488	71.0237	57.5991	40.6535	48.6804	73.5942	82.9535	79.994	mRpL28	RM28_DROME	39S ribosomal protein L28, mitochondrial OS=Drosophila melanogaster GN=mRpL28 PE=2 SV=1	tr|A0A0L0BT61|A0A0L0BT61_LUCCU	39S ribosomal protein L28, mitochondrial OS=Lucilia cuprina GN=FF38_11452 PE=4 SV=1	IPR026569:Ribosomal protein L28/L24	GO:0003735	structural constituent of ribosome	path:ko03010	Ribosome
evm.model.Contig57.98	59.263	55.4776	44.8165	191.751	183.139	157.878	203.336	201.351	194.676	119.785	126.892	111.986	81.3748	91.0123	79.9795	Sod2	SODM_DROME	Superoxide dismutase [Mn], mitochondrial OS=Drosophila melanogaster GN=Sod2 PE=2 SV=3	tr|A0A0L0BQP8|A0A0L0BQP8_LUCCU	Superoxide dismutase OS=Lucilia cuprina GN=FF38_10609 PE=3 SV=1	IPR001189:Manganese/iron superoxide dismutase	GO:0004784	superoxide dismutase activity	path:ko04013,path:ko04068,path:ko04146,path:ko04211,path:ko04212,path:ko04213,path:ko05016	MAPK signaling pathway - fly|FoxO signaling pathway|Peroxisome|Longevity regulating pathway|Longevity regulating pathway - worm|Longevity regulating pathway - multiple species|Huntington's disease
evm.model.Contig72.79	437.712	440.924	445.628	517.339	510.908	469.402	561.444	604.694	565.075	197.299	305.297	166.011	96.1806	88.2297	79.7836	Uqcrc2	QCR2_RAT	Cytochrome b-c1 complex subunit 2, mitochondrial OS=Rattus norvegicus GN=Uqcrc2 PE=1 SV=2	tr|A0A0L0BMM6|A0A0L0BMM6_LUCCU	Uncharacterized protein OS=Lucilia cuprina GN=FF38_08412 PE=4 SV=1	IPR007863:Peptidase M16, C-terminal			path:ko00190,path:ko04260,path:ko04714,path:ko04932,path:ko05010,path:ko05012,path:ko05016	Oxidative phosphorylation|Cardiac muscle contraction|Thermogenesis|Non-alcoholic fatty liver disease (NAFLD)|Alzheimer's disease|Parkinson's disease|Huntington's disease
evm.model.Contig46.84	46.8795	45.5498	49.8356	37.3509	45.7614	38.7131	41.6473	50.9776	46.6793	75.0042	52.1321	60.4067	95.7921	91.7182	79.7195	HIP-R	F10A2_DROME	Hsc70-interacting protein 2 OS=Drosophila melanogaster GN=HIP-R PE=1 SV=2	tr|A0A1I8N5P8|A0A1I8N5P8_MUSDO	Uncharacterized protein OS=Musca domestica GN=101899258 PE=4 SV=1	IPR019734:Tetratricopeptide repeat	GO:0046983	protein dimerization activity
evm.model.Contig36.188	27.302	23.2357	25.9409	16.3416	16.1936	15.3702	16.1424	22.0576	20.9138	60.6358	40.2685	61.2506	86.4308	90.0671	79.7038	CG9132	NECAP_DROME	NECAP-like protein CG9132 OS=Drosophila melanogaster GN=CG9132 PE=2 SV=1	tr|A0A0L0C3P4|A0A0L0C3P4_LUCCU	NECAP-like protein OS=Lucilia cuprina GN=FF38_10938 PE=4 SV=1	IPR012466:NECAP, PHear domain	GO:0006897	endocytosis
evm.model.Contig156.18	39.9742	51.6752	52.1932	19.2304	17.2493	14.8472	23.5342	25.506	32.2892	106.924	57.9323	70.8068	67.2999	76.2525	79.6597	Ptp4a1	TP4A1_RAT	Protein tyrosine phosphatase type IVA 1 OS=Rattus norvegicus GN=Ptp4a1 PE=1 SV=1	tr|A0A1I8P6K0|A0A1I8P6K0_STOCA	Uncharacterized protein OS=Stomoxys calcitrans GN=106087359 PE=4 SV=1	IPR000340:Dual specificity phosphatase, catalytic domain	GO:0008138	protein tyrosine/serine/threonine phosphatase activity
evm.model.Contig134.18	25.772	26.7374	26.8636	27.7426	21.9088	18.5099	31.1181	39.7249	30.6884	54.893	15.2612	37.1706	84.6329	73.8051	79.5425	PREP	PPCE_HUMAN	Prolyl endopeptidase OS=Homo sapiens GN=PREP PE=1 SV=2	tr|A0A0L0CDV7|A0A0L0CDV7_LUCCU	Uncharacterized protein OS=Lucilia cuprina GN=FF38_02686 PE=4 SV=1	IPR023302:Peptidase S9A, N-terminal domain	GO:0006508	proteolysis	path:ko04614	Renin-angiotensin system
evm.model.Contig102.9	298.312	217.255	250.1	434.127	445.852	404.498	435.887	405.87	379.659	139.353	278.433	140.975	84.5014	74.7181	79.5235	NDUFA7	NDUA7_BOVIN	NADH dehydrogenase [ubiquinone] 1 alpha subcomplex subunit 7 OS=Bos taurus GN=NDUFA7 PE=1 SV=2	tr|A0A0L0BXW1|A0A0L0BXW1_LUCCU	Uncharacterized protein OS=Lucilia cuprina GN=FF38_03713 PE=4 SV=1	IPR009947:NADH:ubiquinone oxidoreductase subunit B14.5a	GO:0005743	mitochondrial inner membrane	path:ko00190,path:ko04714,path:ko04723,path:ko04932,path:ko05010,path:ko05012,path:ko05016	Oxidative phosphorylation|Thermogenesis|Retrograde endocannabinoid signaling|Non-alcoholic fatty liver disease (NAFLD)|Alzheimer's disease|Parkinson's disease|Huntington's disease
evm.model.Contig5.357	322.204	287.62	291.2	180.662	190.91	163.581	161.991	241.7	186.204	86.2816	206.627	50.4778	95.9075	51.4705	79.2683	HIGD1A	HIG1A_PONAB	HIG1 domain family member 1A, mitochondrial OS=Pongo abelii GN=HIGD1A PE=3 SV=1	tr|A0A1I8NFK2|A0A1I8NFK2_MUSDO	Uncharacterized protein OS=Musca domestica GN=101893921 PE=4 SV=1	IPR007667:Hypoxia induced protein, domain
evm.model.Contig91.18	14.7863	19.023	19.6778	12.7805	11.7098	10.3312	18.2427	20.3076	21.427	47.624	28.0098	41.5003	71.0295	63.1567	79.1255	Atp6v0a1	VPP1_MOUSE	V-type proton ATPase 116 kDa subunit a isoform 1 OS=Mus musculus GN=Atp6v0a1 PE=1 SV=3	tr|A0A1I8NPI7|A0A1I8NPI7_STOCA	V-type proton ATPase subunit a OS=Stomoxys calcitrans GN=106084259 PE=3 SV=1	IPR002490:V-type ATPase, V0 complex, 116kDa subunit family	GO:0015078	hydrogen ion transmembrane transporter activity	path:ko00190,path:ko04142,path:ko04145,path:ko04721,path:ko04966,path:ko05110,path:ko05120,path:ko05152,path:ko05165,path:ko05323	Oxidative phosphorylation|Lysosome|Phagosome|Synaptic vesicle cycle|Collecting duct acid secretion|Vibrio cholerae infection|Epithelial cell signaling in Helicobacter pylori infection|Tuberculosis|Human papillomavirus infection|Rheumatoid arthritis
evm.model.Contig29.227	44.4097	44.5691	31.8907	70.0752	59.9739	53.4035	58.0294	62.6682	54.8116	59.12	67.0282	50.8551	72.3707	68.1714	78.7192	Rac2	RAC2_DROME	Ras-related protein Rac2 OS=Drosophila melanogaster GN=Rac2 PE=1 SV=1	tr|A0A1L8EHN6|A0A1L8EHN6_HAEIR	Putative ras-related protein rac2 OS=Haematobia irritans PE=3 SV=1	IPR003578:Small GTPase superfamily, Rho type	GO:0005525	GTP binding	path:ko04010,path:ko04013,path:ko04014,path:ko04015,path:ko04024,path:ko04062,path:ko04071,path:ko04145,path:ko04151,path:ko04310,path:ko04360,path:ko04370,path:ko04380,path:ko04510,path:ko04520,path:ko04530,path:ko04620,path:ko04650,path:ko04662,path:ko04664,path:ko04666,path:ko04670,path:ko04722,path:ko04810,path:ko04932,path:ko04933,path:ko04972,path:ko05014,path:ko05100,path:ko05120,path:ko05…	MAPK signaling pathway|MAPK signaling pathway - fly|Ras signaling pathway|Rap1 signaling pathway|cAMP signaling pathway|Chemokine signaling pathway|Sphingolipid signaling pathway|Phagosome|PI3K-Akt signaling pathway|Wnt signaling pathway|Axon guidance|VEGF signaling pathway|Osteoclast differentiation|Focal adhesion|Adherens junction|Tight junction|Toll-like receptor signaling pathway|Natural kill…
evm.model.Contig102.22	1.47052	0.698762	1.79266	0.421376	0.0832477	0.084737	9.89197	16.8253	15.3283	161.938	57.3431	118.357	93.3886	102.409	78.6505	Cyp4d1	CP4D1_DROSI	Cytochrome P450 4d1 OS=Drosophila simulans GN=Cyp4d1 PE=3 SV=1	tr|A0A1I8NQC5|A0A1I8NQC5_STOCA	Uncharacterized protein OS=Stomoxys calcitrans GN=106084174 PE=3 SV=1	IPR001128:Cytochrome P450	GO:0005506	iron ion binding
evm.model.Contig45.90	344.632	273.537	308.308	312.532	322.259	280.594	454.487	515.652	479.71	147.688	148.619	147.303	82.2936	83.218	78.6476	ETFA	ETFA_HUMAN	Electron transfer flavoprotein subunit alpha, mitochondrial OS=Homo sapiens GN=ETFA PE=1 SV=1	tr|A0A0L0BTK3|A0A0L0BTK3_LUCCU	Uncharacterized protein (Fragment) OS=Lucilia cuprina GN=FF38_00751 PE=4 SV=1	IPR014731:Electron transfer flavoprotein, alpha subunit, C-terminal
evm.model.Contig27.181	109.452	108.518	108.052	61.5021	59.6059	45.014	42.8042	45.2084	46.0271	75.0311	53.905	65.2047	74.5246	72.8255	78.583	Ddx5	DDX5_MOUSE	Probable ATP-dependent RNA helicase DDX5 OS=Mus musculus GN=Ddx5 PE=1 SV=2	tr|A0A0L0BWK4|A0A0L0BWK4_LUCCU	Uncharacterized protein (Fragment) OS=Lucilia cuprina GN=FF38_14185 PE=3 SV=1	IPR011545:DEAD/DEAH box helicase domain	GO:0003676	nucleic acid binding	path:ko03040,path:ko05202,path:ko05205	Spliceosome|Transcriptional misregulation in cancer|Proteoglycans in cancer
evm.model.Contig135.63	222.868	213.775	212.361	112.33	147.318	151.579	288.687	303.157	348.825	95.4229	77.465	95.4639	92.7591	70.0659	78.5517	CTH	CGL_PIG	Cystathionine gamma-lyase OS=Sus scrofa GN=CTH PE=2 SV=1	tr|A0A0L0CDY9|A0A0L0CDY9_LUCCU	Uncharacterized protein OS=Lucilia cuprina GN=FF38_02166 PE=3 SV=1	IPR000277:Cys/Met metabolism, pyridoxal phosphate-dependent enzyme	GO:0030170	pyridoxal phosphate binding	path:ko00260,path:ko00270,path:ko00450	Glycine, serine and threonine metabolism|Cysteine and methionine metabolism|Selenocompound metabolism
evm.model.Contig31.261	310.53	252.051	298.169	160.919	177.555	174.137	105.187	130.889	131.419	76.8795	50.0646	61.8372	94.2367	74.8849	78.5065	Ran	RAN_DROME	GTP-binding nuclear protein Ran OS=Drosophila melanogaster GN=Ran PE=1 SV=1	tr|T1PAV1|T1PAV1_MUSDO	GTP-binding nuclear protein OS=Musca domestica GN=101897713 PE=2 SV=1	IPR002041:Ran GTPase	GO:0003924	GTPase activity	path:ko03008,path:ko03013,path:ko05166,path:ko05169	Ribosome biogenesis in eukaryotes|RNA transport|HTLV-I infection|Epstein-Barr virus infection
evm.model.Contig162.15	40.7977	39.76	39.7973	23.7643	21.9003	20.1557	21.3243	31.5966	27.5419	57.1662	40.2392	54.1033	78.6628	87.4494	78.2604	Fkbp8	FKBP8_RAT	Peptidyl-prolyl cis-trans isomerase FKBP8 OS=Rattus norvegicus GN=Fkbp8 PE=2 SV=1	tr|A0A1I8MHG7|A0A1I8MHG7_MUSDO	Peptidylprolyl isomerase OS=Musca domestica GN=101896907 PE=4 SV=1	IPR023566:Peptidyl-prolyl cis-trans isomerase, FKBP-type	GO:0005515	protein binding
evm.model.Contig29.22	50.0792	35.6508	40.0123	15.1811	20.068	19.4695	36.1066	59.6872	45.8222	52.8721	48.12	73.8099	62.1954	77.8172	78.1294	PDXK	PDXK_HUMAN	Pyridoxal kinase OS=Homo sapiens GN=PDXK PE=1 SV=1	tr|A0A0L0CSH7|A0A0L0CSH7_LUCCU	Uncharacterized protein OS=Lucilia cuprina GN=FF38_05918 PE=4 SV=1	IPR013749:Pyridoxamine kinase/Phosphomethylpyrimidine kinase	GO:0008478	pyridoxal kinase activity	path:ko00750	Vitamin B6 metabolism
evm.model.Contig29.157	125.555	116.465	95.1813	45.6697	58.6681	65.7271	35.7839	89.3837	96.6609	21.5874	23.5496	17.5541	80.6468	89.1706	78.0263	Srp9	SRP09_DROME	Signal recognition particle 9 kDa protein OS=Drosophila melanogaster GN=Srp9 PE=3 SV=1	tr|A0A0L0CA93|A0A0L0CA93_LUCCU	Signal recognition particle 9 kDa protein OS=Lucilia cuprina GN=FF38_13606 PE=3 SV=1				path:ko03060	Protein export
evm.model.Contig10.348	196.386	169.035	202.254	93.415	102.989	95.8332	90.0776	152.93	124.809	85.8254	80.1095	66.074	86.8945	97.5131	77.9965	Trxr-1	TRXR1_DROME	Thioredoxin reductase 1, mitochondrial OS=Drosophila melanogaster GN=Trxr-1 PE=1 SV=2	tr|A0A1I8P889|A0A1I8P889_STOCA	Uncharacterized protein OS=Stomoxys calcitrans GN=106080851 PE=3 SV=1	IPR023753:FAD/NAD(P)-binding domain	GO:0016491	oxidoreductase activity	path:ko00450	Selenocompound metabolism
evm.model.Contig6.602	631.098	594.498	686.685	243.458	280.161	264.531	177.39	310.234	239.429	76.2985	58.8986	65.6759	73.8025	74.3531	77.9953	Hsc70-5	HSP7E_DROME	Heat shock 70 kDa protein cognate 5 OS=Drosophila melanogaster GN=Hsc70-5 PE=1 SV=2	tr|T1PA42|T1PA42_MUSDO	Hsp70 protein OS=Musca domestica GN=101894739 PE=2 SV=1	IPR013126:Heat shock protein 70 family			path:ko03018,path:ko04212,path:ko05152	RNA degradation|Longevity regulating pathway - worm|Tuberculosis
evm.model.Contig6.537	21.6908	22.3197	23.3249	11.881	12.9173	9.59417	12.7138	15.1318	13.0905	62.9297	42.4753	52.5633	90.5009	72.3529	77.8243	Ogt	OGT1_MOUSE	UDP-N-acetylglucosamine--peptide N-acetylglucosaminyltransferase 110 kDa subunit OS=Mus musculus GN=Ogt PE=1 SV=2	tr|A0A1I8NBP2|A0A1I8NBP2_MUSDO	Uncharacterized protein OS=Musca domestica GN=101896707 PE=4 SV=1	IPR001440:Tetratricopeptide repeat 1	GO:0005515	protein binding	path:ko00514,path:ko04931	Other types of O-glycan biosynthesis|Insulin resistance
evm.model.Contig12.169	13.3204	13.5052	13.9317	11.6394	8.88024	6.03957	41.7886	30.3135	25.3508	46.7724	45.7665	29.4001	76.9805	102.046	77.7018	Pdk	PDK_DROME	[Pyruvate dehydrogenase (acetyl-transferring)] kinase, mitochondrial OS=Drosophila melanogaster GN=Pdk PE=2 SV=2	tr|A0A0L0CA08|A0A0L0CA08_LUCCU	[Pyruvate dehydrogenase (Acetyl-transferring)] kinase, mitochondrial OS=Lucilia cuprina GN=FF38_02433 PE=4 SV=1	IPR018955:Branched-chain alpha-ketoacid dehydrogenase kinase/Pyruvate dehydrogenase kinase, N-terminal
evm.model.Contig70.67	0	0	0	0	0	0.427603	0.101631	0	0	0.097547	0.0981446	0.101775	46.4912	132.047	77.6872				tr|A0A0L0CM17|A0A0L0CM17_LUCCU	Uncharacterized protein OS=Lucilia cuprina GN=FF38_00502 PE=4 SV=1	IPR010629:Insect allergen-related
evm.model.Contig6.439	19.133	17.0656	17.2936	14.8808	13.5885	12.6288	8.56019	15.0163	11.6469	15.0426	9.6163	17.725	74.1356	64.5944	77.6086	cptp	CPTP_DANRE	Ceramide-1-phosphate transfer protein OS=Danio rerio GN=cptp PE=2 SV=1	tr|A0A0L0C2X4|A0A0L0C2X4_LUCCU	Uncharacterized protein OS=Lucilia cuprina GN=FF38_09973 PE=4 SV=1	IPR014830:Glycolipid transfer protein domain	GO:0005737	cytoplasm
evm.model.Contig5.249	259.644	265.074	292.343	179.673	217.648	189.379	88.5246	110.348	84.7573	69.2463	56.2623	54.3199	86.3827	77.2599	77.4959	Cctgamma	TCPG_DROME	T-complex protein 1 subunit gamma OS=Drosophila melanogaster GN=Cctgamma PE=2 SV=2	tr|A0A0L0BZX0|A0A0L0BZX0_LUCCU	T-complex protein 1 subunit gamma OS=Lucilia cuprina GN=FF38_12959 PE=3 SV=1	IPR012719:T-complex protein 1, gamma subunit	GO:0005524	ATP binding
evm.model.Contig207.10	82.7075	76.8781	85.3728	58.1848	68.5497	65.1595	71.1127	93.6512	94.6006	87.1826	83.6023	70.5189	79.9665	78.554	77.4734	Zmpste24	FACE1_MOUSE	CAAX prenyl protease 1 homolog OS=Mus musculus GN=Zmpste24 PE=1 SV=2	tr|A0A0L0BYZ1|A0A0L0BYZ1_LUCCU	Uncharacterized protein OS=Lucilia cuprina GN=FF38_04249 PE=4 SV=1	IPR001915:Peptidase M48	GO:0004222	metalloendopeptidase activity	path:ko00900	Terpenoid backbone biosynthesis
evm.model.Contig7.455	99.0708	87.6805	74.8692	3.11222	7.90403	9.40401	55.9788	80.7533	150.75	171.325	85.144	238.913	76.8131	74.3491	77.2239	Tmlhe	TMLH_RAT	Trimethyllysine dioxygenase, mitochondrial OS=Rattus norvegicus GN=Tmlhe PE=1 SV=2	tr|A0A0L0CG61|A0A0L0CG61_LUCCU	Uncharacterized protein OS=Lucilia cuprina GN=FF38_14308 PE=4 SV=1	IPR003819:TauD/TfdA-like domain	GO:0016491	oxidoreductase activity	path:ko00310	Lysine degradation
evm.model.Contig33.87	717.719	691.855	541.979	333.149	384.498	356.783	775.215	1056.38	1310.81	68.3352	99.3139	54.2881	82.7461	103.416	77.179	GST1	GSTT1_LUCCU	Glutathione S-transferase 1-1 OS=Lucilia cuprina GN=GST1 PE=1 SV=2	tr|A0A0G4AJM1|A0A0G4AJM1_LUCSE	Glutathione S-transferases 1-1 OS=Lucilia sericata PE=2 SV=1	IPR004045:Glutathione S-transferase, N-terminal	GO:0005515	protein binding	path:ko00480,path:ko00980,path:ko00982,path:ko00983,path:ko01524,path:ko05200,path:ko05204,path:ko05225,path:ko05418	Glutathione metabolism|Metabolism of xenobiotics by cytochrome P450|Drug metabolism - cytochrome P450|Drug metabolism - other enzymes|Platinum drug resistance|Pathways in cancer|Chemical carcinogenesis|Hepatocellular carcinoma|Fluid shear stress and atherosclerosis
evm.model.Contig27.227	61.1448	61.267	68.5703	17.8337	20.8891	31.0956	39.104	72.9633	77.9691	43.9092	27.1985	35.5912	88.4489	76.2548	77.1669	LMAN1	LMAN1_CHLAE	Protein ERGIC-53 OS=Chlorocebus aethiops GN=LMAN1 PE=2 SV=1	tr|A0A0L0BYM0|A0A0L0BYM0_LUCCU	Zinc transporter foi (Fragment) OS=Lucilia cuprina GN=FF38_07755 PE=4 SV=1	IPR005052:Legume-like lectin	GO:0016020	membrane	path:ko04141	Protein processing in endoplasmic reticulum
evm.model.Contig6.859	121.945	104.11	100.17	77.1331	83.9472	75.2895	80.8636	87.0722	92.054	87.7171	53.9594	87.2172	87.9624	77.1124	77.1528	C35D10.1	YLC1_CAEEL	ER membrane protein complex subunit 7 homolog OS=Caenorhabditis elegans GN=C35D10.1 PE=3 SV=1	tr|A0A0L0CDN3|A0A0L0CDN3_LUCCU	Uncharacterized protein OS=Lucilia cuprina GN=FF38_11513 PE=4 SV=1	IPR019008:Domain of unknown function DUF2012
[truncated: 14,828 more rows]

## Sheet: Table S5
Table S5. GO significant enrichment analysis of continually down-regulated genes.
id	term	category	ListHits	ListTotal	PopHits	PopTotal	pval	padj	Enrichment_score	Gene
GO:0008495	protoheme IX farnesyltransferase activity	molecular_function	1	379	1	7409	0	0	19.5488	evm.model.Contig3.240
[truncated: 139 more rows]

## Sheet: Table S6
Table S6. KEGG significant enrichment analysis of continually down-regulated genes.
[truncated: 228 more rows]

[truncated: 8 more sheets: Table S7, Table S8, Table S9, Table S10, Table S11, Table S12, Table S13, Table S14]
